# Supplementary material for: Design of synthetic bacterial communities for predictable plant phenotypes
Source: PLoS Biol. 2018 Feb 20;16(2):e2003962. doi: 10.1371/journal.pbio.2003962 (PMC5819758; doi:10.1371/journal.pbio.2003962)
Supplement: S4 Table — For each of the strains used in the synthetic communities experiments, we indicate its ID, its taxonomy, the blocks of bacteria to which it belongs, the ID in the binary-association assays, the taxon_oid, which can be used to retrieve their full genome from the DOE JGI IMG database, and the full strain name. The information used in this table and additional data can be found in https://github.com/surh/wheelP under the descriptor “Tax. Colonization.” DOE, Department of Energy; ID, strain identifier; IMG, Integrated Microbial Genomes; JGI, Joint Genome Institute. (XLSX) [file pbio.2003962.s016.xlsx]

## Sheet: S4_Table
S4 Table. List of strains used in the synthetic communities experiments. For each of the strains used in the synthetic communities experiments, we indicate their ID, its taxonomy, the blocks of bacteria to which it belongs, the ID in the binary association assays, the taxon_oid which can be used to retrieve their full genome from the DOE JGI Integrated Microbial Genomes (IMG) database and the ful…
ID	Phylym	Class	Order	Family	Genus	Type	Block	MonoID	taxon_oid	Name
10	Proteobacteria	Alphaproteobacteria	Rhizobiales	Rhizobiaceae	Agrobacterium	Indifferent	I1	10	2521172663	Agrobacterium sp. 10MFCol1.1
20	Proteobacteria	Gammaproteobacteria	Pseudomonadales	Pseudomonadaceae	Pseudomonas	Indifferent	I3	20	2517572232	Pseudomonas umsongensis 20MFCvi1.1
28	Proteobacteria	Alphaproteobacteria	Rhizobiales	Rhizobiaceae	Rhizobium	Positive	P3	28	2643221483	Rhizobium sp. 28MFCol1.1
33	Proteobacteria	Alphaproteobacteria	Rhizobiales	Rhizobiaceae	Agrobacterium	Indifferent	I3	33	2561511224	Agrobacterium sp. 33MFTa1.1
36	Proteobacteria	Gammaproteobacteria	Pseudomonadales	Pseudomonadaceae	Pseudomonas	Indifferent	I2	36	2521172653	Pseudomonas mandelii 36MFCvi1.1
59	Actinobacteria	Actinobacteria	Actinomycetales	Microbacteriaceae	Leifsonia	Negative	N3	59	NA	NA
69	Firmicutes	Bacilli	Bacillales	Bacillaceae	Bacillus	Negative	N2	69	2574179747	Bacillus sp. UNC69MF
72	Proteobacteria	Alphaproteobacteria	Rhizobiales	Rhizobiaceae	Rhizobium	Negative	N1	72	2510065092	Rhizobium sp. IBUN
74	Actinobacteria	Actinobacteria	Actinomycetales	Micrococcaceae	Renibacterium	Positive	P3	74	NA	NA
77	Actinobacteria	Actinobacteria	Actinomycetales	Microbacteriaceae	Microbacterium	Indifferent	I1	77	2521172614	Microbacterium paraoxydans 77MFTsu3.2
88	Actinobacteria	Actinobacteria	Actinomycetales	Nocardiaceae	Millisia	Negative	N3	88	NA	NA
113	Proteobacteria	Gammaproteobacteria	Pseudomonadales	Pseudomonadaceae	Pseudomonas	Positive	P1	113	2643221484	Pseudomonas sp. 113MF
121	Proteobacteria	Gammaproteobacteria	Pseudomonadales	Pseudomonadaceae	Pseudomonas	Positive	P3	121	NA	NA
122	Proteobacteria	Alphaproteobacteria	Rhizobiales	Rhizobiaceae	Ensifer	Indifferent	I1	122	NA	NA
123	Firmicutes	Bacilli	Bacillales	Bacillaceae	Bacillus	Negative	N1	123	2521172627	Bacillus sp. 123MFChir2
131	Actinobacteria	Actinobacteria	Actinomycetales	Micrococcaceae	Arthrobacter	Indifferent	I2	131	2517572122	Arthrobacter sp. 131MFCol6.1
143	Firmicutes	Bacilli	Bacillales	Bacillaceae 1	Bacillus	Indifferent	I1	143	NA	NA
146	Proteobacteria	Alphaproteobacteria	Rhizobiales	Rhizobiaceae	Ciceribacter	Positive	P3	146	NA	NA
160	Proteobacteria	Alphaproteobacteria	Rhizobiales	Brucellaceae	Falsochrobactrum	Positive	P1	160	NA	NA
165	Proteobacteria	Betaproteobacteria	Burkholderiales	Comamonadaceae	Variovorax	Indifferent	I3	165	NA	NA
168	Proteobacteria	Alphaproteobacteria	Sphingomonadales	Sphingomonadaceae	Sphingomonas	Indifferent	I3	168	NA	NA
186	Proteobacteria	Alphaproteobacteria	Rhizobiales	Phyllobacteriaceae	Phyllobacterium	Positive	P3	186	NA	NA
210	Actinobacteria	Actinobacteria	Actinomycetales	Microbacteriaceae	Leifsonia	Positive	P3	210	NA	NA
211	Firmicutes	Bacilli	Bacillales	Bacillaceae 1	Bacillus	Indifferent	I2	211	NA	NA
214	Actinobacteria	Actinobacteria	Actinomycetales	Mycobacteriaceae	Mycobacterium	Negative	N1	214	NA	NA
215	Firmicutes	Bacilli	Bacillales	Bacillaceae	Bacillus	Positive	P1	215	2643221488	Bacillus sp. 215MF
217	Firmicutes	Bacilli	Bacillales	Paenibacillaceae	Paenibacillus	Positive	P1	217	2563366516	Paenibacillus sp. UNC217MF
218	Firmicutes	Bacilli	Bacillales	Bacillaceae 1	Bacillus	Negative	N2	218	NA	NA
224	Proteobacteria	Alphaproteobacteria	Rhizobiales	Rhizobiaceae	Agrobacterium	Negative	N2	224	2521172624	Agrobacterium sp. 224MFTsu3.1
229	Actinobacteria	Actinobacteria	Actinomycetales	Micrococcaceae	Arthrobacter	Positive	P3	229	NA	NA
233	Proteobacteria	Alphaproteobacteria	Rhizobiales	Rhizobiaceae	Agrobacterium	Negative	N1	233	2643221489	Agrobacterium tumefaciens 233MFSha2.1
259	Actinobacteria	Actinobacteria	Corynebacteriales	Nocardiaceae	Rhodococcus	Negative	N1	259	2643221491	Rhodococcus maanshanensis 259MFSha1.1
267	Actinobacteria	Actinobacteria	Actinomycetales	Mycobacteriaceae	Mycobacterium	Negative	N3	267	2593339259	Mycobacterium sp. UNC267MFSha1.1M11
275	Proteobacteria	Alphaproteobacteria	Rhizobiales	Methylobacteriaceae	Methylobacterium	Indifferent	I2	275	2590828857	Methylobacterium sp. 275MFSha3.1
278	Proteobacteria	Betaproteobacteria	Burkholderiales	Comamonadaceae	Variovorax	Positive	P1	278	2643221492	Variovorax sp. 278MFTsu5.1
283	Actinobacteria	Actinobacteria	Corynebacteriales	Mycobacteriaceae	Mycobacterium	Indifferent	I2	283	2636416058	Mycobacterium sp. 283MFTsu
295	Proteobacteria	Betaproteobacteria	Burkholderiales	Comamonadaceae	Variovorax	Indifferent	I2	295	2643221495	Variovorax paradoxus 295MFChir4.1
316	Proteobacteria	Alphaproteobacteria	Sphingomonadales	Sphingomonadaceae	Sphingomonas	Indifferent	I2	316	NA	NA
317	Firmicutes	Bacilli	Bacillales	Bacillaceae 1	Bacillus	Indifferent	I3	317	NA	NA
329	Proteobacteria	Gammaproteobacteria	Xanthomonadales	Xanthomonadaceae	Luteibacter	Indifferent	I1	329	2639762521	Luteibacter sp. 329MFSha
339	Actinobacteria	Actinobacteria	Corynebacteriales	Nocardiaceae	Rhodococcus	Negative	N1	339	2643221496	Rhodococcus erythropolis 339MFSha3.1
340	Actinobacteria	Actinobacteria	Actinomycetales	Microbacteriaceae	Cryocola	Positive	P2	340	2522125173	Cryocola sp. 340MFSha3.1
350	Proteobacteria	Betaproteobacteria	Burkholderiales	Comamonadaceae	Variovorax	Negative	N1	350	2643221498	Variovorax sp. 350MFTsu5.1
351	Actinobacteria	Actinobacteria	Actinomycetales	Streptomycetaceae	Streptomyces	Negative	N3	351	2521172628	Streptomyces sp. 351MFTsu5.1
363	Actinobacteria	Actinobacteria	Actinomycetales	Nocardiaceae	Rhodococcus	Indifferent	I3	363	2563366512	Rhodococcus sp. UNC363MFTsu5.1
370	Proteobacteria	Alphaproteobacteria	Rhizobiales	Brucellaceae	Ochrobactrum	Indifferent	I3	370	2643221500	Ochrobactrum sp. 370MFChir3.1
371	Bacteroidetes	Sphingobacteriia	Sphingobacteriales	Sphingobacteriaceae	Pseudosphingobacterium	Positive	P2	371	NA	NA
375	Proteobacteria	Betaproteobacteria	Burkholderiales	Comamonadaceae	Variovorax	Negative	N1	375	2643221501	Variovorax sp. 375MFSha3.1
376	Proteobacteria	Betaproteobacteria	Burkholderiales	Burkholderiaceae	Burkholderia	Negative	N2	376	2521172625	Burkholderia bryophila 376MFSha3.1
384	Proteobacteria	Betaproteobacteria	Burkholderiales	Burkholderiaceae	Burkholderia	Negative	N3	384	2546825545	Burkholderia MF384
385	Firmicutes	Bacilli	Bacillales	Bacillaceae 1	Bacillus	Positive	P2	385	NA	NA
474	Firmicutes	Bacilli	Bacillales	Paenibacillaceae 1	Paenibacillus	Positive	P2	474	NA	NA
494	Actinobacteria	Actinobacteria	Actinomycetales	Mycobacteriaceae	Mycobacterium	Negative	N2	494	NA	NA
499	Firmicutes	Bacilli	Bacillales	Paenibacillaceae	Paenibacillus	Positive	P2	499	2593339197	Paenibacillus sp. UNC499MF
111A	Proteobacteria	Alphaproteobacteria	Rhizobiales	Methylobacteriaceae	Methylobacterium	Positive	P3	111	2590828855	Methylobacterium brachiatum 111MFTsu3.1M4
111B	Actinobacteria	Actinobacteria	Actinomycetales	Nocardiaceae	Rhodococcus	Positive	P3	111	NA	NA
137A	Proteobacteria	Betaproteobacteria	Burkholderiales	Comamonadaceae	Variovorax	Positive	P2	137	NA	NA
137B	Firmicutes	Bacilli	Bacillales	Bacillaceae 1	Bacillus	Positive	P2	137	NA	NA
13A	Proteobacteria	Alphaproteobacteria	Rhizobiales	Methylobacteriaceae	Methylobacterium	Negative	N3	13	2590828854	Methylobacterium sp. 13MFTsu3.1M2
13B	Actinobacteria	Actinobacteria	Actinomycetales	Micrococcaceae	Arthrobacter	Negative	N3	13	NA	NA
1B	Proteobacteria	Betaproteobacteria	Burkholderiales	Comamonadaceae	Variovorax	Negative	N3	1	NA	NA
30A	Proteobacteria	Gammaproteobacteria	Pseudomonadales	Moraxellaceae	Acinetobacter	Indifferent	I2	30	NA	NA
Acine	Proteobacteria	Gammaproteobacteria	Pseudomonadales	Moraxellaceae	Acinetobacter	Positive	P2	Acine	NA	NA
30B	Proteobacteria	Gammaproteobacteria	Pseudomonadales	Pseudomonadaceae	Pseudomonas	Indifferent	I2	30	NA	NA
345A	Actinobacteria	Actinobacteria	Actinomycetales	Nocardioidaceae	Nocardioides	Negative	N2	345	2582580751	Nocardioides sp. UNC345MFTsu5.1
345B	Proteobacteria	Gammaproteobacteria	Xanthomonadales	Xanthomonadaceae	Stenotrophomonas	Negative	N2	345	NA	NA
CL11	Proteobacteria	Betaproteobacteria	Burkholderiales	Burkholderiaceae	Burkholderia	Negative	N2	CL11	2546825541	Burkholderia CL11
CL149	Actinobacteria	Actinobacteria	Actinomycetales	Micrococcaceae	Arthrobacter	Indifferent	I1	CL149	NA	NA
CL151	Actinobacteria	Actinobacteria	Actinomycetales	Microbacteriaceae	Microbacterium	Indifferent	I2	CL151	NA	NA
CL155	Actinobacteria	Actinobacteria	Actinomycetales	Microbacteriaceae	Leifsonia	Indifferent	I1	CL155	NA	NA
CL17	Actinobacteria	Actinobacteria	Actinomycetales	Microbacteriaceae	Curtobacterium	Indifferent	I1	CL17	2563366719	Curtobacterium sp. UNCCL17
CL21	Proteobacteria	Betaproteobacteria	Burkholderiales	Burkholderiaceae	Ralstonia	Positive	P1	CL21	2558309150	Ralstonia sp. UNC404CL21Col
CL28	Actinobacteria	Actinobacteria	Actinomycetales	Micrococcaceae	Arthrobacter	Positive	P1	CL28	2593339130	Arthrobacter sp. UNCCL28
CL32	Proteobacteria	Alphaproteobacteria	Rhizobiales	Rhizobiaceae	Agrobacterium	Negative	N2	CL32	2643221509	Agrobacterium tumefaciens CL32Tsu
CL52	Firmicutes	Bacilli	Bacillales	Paenibacillaceae	Paenibacillus	Negative	N3	CL52	2563366513	Paenibacillus sp. UNCCL52
CL59	Actinobacteria	Actinobacteria	Actinomycetales	Microbacteriaceae	Leifsonia	Positive	P1	CL59	NA	NA
CL71	Actinobacteria	Actinobacteria	Actinomycetales	Nocardiaceae	Rhodococcus	Positive	P2	CL71	NA	NA
CL81	Firmicutes	Bacilli	Bacillales	Bacillaceae	Bacillus	Positive	P2	CL81	2593339131	Bacillus sp. UNCCL81
CL87	Actinobacteria	Actinobacteria	Actinomycetales	Microbacteriaceae	Microbacterium	Indifferent	I1	CL87	NA	NA
CL89	Actinobacteria	Actinobacteria	Micrococcales	Microbacteriaceae	Microbacterium	Negative	N1	CL89	2643221511	Microbacterium azadirachtae CL89
CL96	Firmicutes	Bacilli	Bacillales	Bacillaceae	Bacillus	Positive	P1	CL96	2639762528	Bacillus sp. CL96
CL4	Proteobacteria	Alphaproteobacteria	Caulobacterales	Caulobacteraceae	Brevundimonas	Positive	P2	CL4	2643221505	Brevundimonas sp. CL04Tsu
240	NA	NA	NA	NA	NA	Indifferent	I3	240	NA	NA
CL9	Actinobacteria	Actinobacteria	Actinomycetales	Mycobacteriaceae	Mycobacterium	Negative	N2	CL9	2576861824	Mycobacterium sp. UNCCL9
