# Supplementary material for: Design of synthetic bacterial communities for predictable plant phenotypes
Source: PLoS Biol. 2018 Feb 20;16(2):e2003962. doi: 10.1371/journal.pbio.2003962 (PMC5819758; doi:10.1371/journal.pbio.2003962)
Supplement: S5 Table — Tab (a) shows the effect of individual bacterial blocks (Block effects) and tab (b) the effect of synthetic communities (SynCom effects) on shoot Pi accumulation. For each bacterial block (a) or synthetic community (b), its effect on shoot Pi accumulation was determined via ANOVA (Materials and methods 3j). For each test, we indicate the starting (StartP) and final (EndP) Pi concentrations, the estimated log(fold-change) in Pi content with respect to no bacteria (Estimate), the standard error of that estimate (SE), the associated t statistic (t.value), and the p-value of a 2-sided test (p.value). Pi, phosphate; SynCom, synthetic community. (XLSX) [file pbio.2003962.s017.xlsx]

## Sheet: Legend
S5 Table. Table shows the effect of bacterial consortia on shoot Pi accumulation. Tab a) shows the effect of individual bacterial blocks (Block effects) and Tab b) the effect of synthetic communities (SynCom effects) on shoot Pi accumulation. For each bacterial block (a) or synthetic community (b), its effect on shoot Pi accumulation was determined via ANOVA (Materials and Methods 3j). For each t…

## Sheet: a) Block Effects
Block	StartP	EndP	Estimate	SE	t.value	p.value
P1	-Pi,0.5%Suc	100 uM,0%Suc	-0.0504094	0.0522472	-0.964825	0.337189
P2	-Pi,0.5%Suc	100 uM,0%Suc	-0.113254	0.0512084	-2.21163	0.0294966
P3	-Pi,0.5%Suc	100 uM,0%Suc	-0.0229661	0.0512084	-0.448483	0.654871
I1	-Pi,0.5%Suc	100 uM,0%Suc	-0.0208048	0.0546598	-0.380623	0.70437
I2	-Pi,0.5%Suc	100 uM,0%Suc	-0.101218	0.0916747	-1.1041	0.27246
I3	-Pi,0.5%Suc	100 uM,0%Suc	0.0440568	0.0941043	0.468169	0.640783
N1	-Pi,0.5%Suc	100 uM,0%Suc	-0.357865	0.105645	-3.38743	0.00104381
N2	-Pi,0.5%Suc	100 uM,0%Suc	-0.0963447	0.0888166	-1.08476	0.280893
N3	-Pi,0.5%Suc	100 uM,0%Suc	-0.353652	0.0749358	-4.71941	8.52507e-06
P1	-Pi,0.5%Suc	30 uM,0%Suc	-0.715364	0.14753	-4.84893	5.09472e-06
P2	-Pi,0.5%Suc	30 uM,0%Suc	-0.625741	0.144597	-4.32748	3.86284e-05
P3	-Pi,0.5%Suc	30 uM,0%Suc	0.220152	0.144597	1.52252	0.131346
I1	-Pi,0.5%Suc	30 uM,0%Suc	-0.15936	0.154343	-1.0325	0.304572
I2	-Pi,0.5%Suc	30 uM,0%Suc	-0.938019	0.258861	-3.62363	0.000478095
I3	-Pi,0.5%Suc	30 uM,0%Suc	0.0841848	0.265722	0.316815	0.752109
N1	-Pi,0.5%Suc	30 uM,0%Suc	-2.14757	0.29831	-7.19914	1.68242e-10
N2	-Pi,0.5%Suc	30 uM,0%Suc	-0.751578	0.250791	-2.99683	0.00351572
N3	-Pi,0.5%Suc	30 uM,0%Suc	-1.92251	0.211596	-9.08578	2.0892e-14
P1	+Pi,0.5%Suc	100 uM,0%Suc	0.00564356	0.0459568	0.122802	0.902535
P2	+Pi,0.5%Suc	100 uM,0%Suc	-0.10894	0.045043	-2.41858	0.017572
P3	+Pi,0.5%Suc	100 uM,0%Suc	-0.138213	0.045043	-3.06845	0.00283485
I1	+Pi,0.5%Suc	100 uM,0%Suc	-0.042885	0.048079	-0.89197	0.374762
I2	+Pi,0.5%Suc	100 uM,0%Suc	-0.240008	0.0806373	-2.97639	0.00373608
I3	+Pi,0.5%Suc	100 uM,0%Suc	0.198995	0.0827745	2.40406	0.018241
N1	+Pi,0.5%Suc	100 uM,0%Suc	-0.222966	0.0929257	-2.3994	0.0184605
N2	+Pi,0.5%Suc	100 uM,0%Suc	-0.0378984	0.0781233	-0.48511	0.628764
N3	+Pi,0.5%Suc	100 uM,0%Suc	-0.194737	0.0659137	-2.95442	0.00398721
P1	+Pi,0.5%Suc	30 uM,0%Suc	-0.150821	0.135164	-1.11584	0.26743
P2	+Pi,0.5%Suc	30 uM,0%Suc	-0.768002	0.132476	-5.79729	9.6136e-08
P3	+Pi,0.5%Suc	30 uM,0%Suc	0.310813	0.132476	2.34618	0.0211383
I1	+Pi,0.5%Suc	30 uM,0%Suc	-0.826473	0.141405	-5.84471	7.81847e-08
I2	+Pi,0.5%Suc	30 uM,0%Suc	-0.741495	0.237163	-3.12652	0.00237497
I3	+Pi,0.5%Suc	30 uM,0%Suc	-0.213722	0.243448	-0.877894	0.382313
N1	+Pi,0.5%Suc	30 uM,0%Suc	-1.43576	0.273304	-5.25335	9.76113e-07
N2	+Pi,0.5%Suc	30 uM,0%Suc	-0.788438	0.229769	-3.43144	0.000904815
N3	+Pi,0.5%Suc	30 uM,0%Suc	-1.75388	0.193859	-9.04717	2.51638e-14
P1I1	-Pi,0.5%Suc	100 uM,0%Suc	-0.266087	0.0798126	-3.3339	0.00874458
P1I1	+Pi,0.5%Suc	100 uM,0%Suc	0.0228095	0.0979862	0.232783	0.821138
P1I1	-Pi,0.5%Suc	30 uM,0%Suc	-1.58275	0.175137	-9.0372	8.25468e-06
P1I1	+Pi,0.5%Suc	30 uM,0%Suc	-1.57708	0.143719	-10.9734	1.64314e-06
P2I1	-Pi,0.5%Suc	100 uM,0%Suc	-0.162858	0.0717572	-2.26957	0.049398
P2I1	+Pi,0.5%Suc	100 uM,0%Suc	-0.136179	0.103543	-1.31519	0.220966
P2I1	-Pi,0.5%Suc	30 uM,0%Suc	-0.447948	0.088768	-5.04628	0.000693843
P2I1	+Pi,0.5%Suc	30 uM,0%Suc	-1.8601	0.29621	-6.27969	0.00014443
P1P3	-Pi,0.5%Suc	100 uM,0%Suc	-0.0381294	0.0380698	-1.00156	0.34272
P1P3	+Pi,0.5%Suc	100 uM,0%Suc	0.033449	0.0967536	0.345713	0.737502
P1P3	-Pi,0.5%Suc	30 uM,0%Suc	-0.222971	0.0621232	-3.58918	0.00584628
P1P3	+Pi,0.5%Suc	30 uM,0%Suc	0.129973	0.0526324	2.46944	0.0356028
P2N3	-Pi,0.5%Suc	100 uM,0%Suc	-0.578669	0.140326	-4.12374	0.00258347
P2N3	+Pi,0.5%Suc	100 uM,0%Suc	-0.276766	0.0448636	-6.16905	0.00016489
P2N3	-Pi,0.5%Suc	30 uM,0%Suc	-3.24287	0.147717	-21.9532	3.98571e-09
P2N3	+Pi,0.5%Suc	30 uM,0%Suc	-2.69982	0.144562	-18.6758	1.65991e-08
P3N3	-Pi,0.5%Suc	100 uM,0%Suc	-0.635982	0.125196	-5.07988	0.000662945
P3N3	+Pi,0.5%Suc	100 uM,0%Suc	-0.520291	0.0688225	-7.55989	3.4685e-05
P3N3	-Pi,0.5%Suc	30 uM,0%Suc	-2.09482	0.301701	-6.94336	6.73408e-05
P3N3	+Pi,0.5%Suc	30 uM,0%Suc	-1.58163	0.213702	-7.4011	4.09863e-05

## Sheet: b) SynCom Effects
SynCom	StartP	EndP	Estimate	SE	t.value	p.value
P1P2	-Pi,0.5%Suc	100 uM,0%Suc	-0.122753	0.0739678	-1.65954	0.131378
P1P2	+Pi,0.5%Suc	100 uM,0%Suc	-0.25243	0.0711704	-3.54684	0.00624679
P1P2	-Pi,0.5%Suc	30 uM,0%Suc	-1.02498	0.187717	-5.46025	0.000400298
P1P2	+Pi,0.5%Suc	30 uM,0%Suc	-0.31033	0.09765	-3.17798	0.0112211
P2P3	-Pi,0.5%Suc	100 uM,0%Suc	-0.113172	0.0668415	-1.69313	0.124678
P2P3	+Pi,0.5%Suc	100 uM,0%Suc	-0.254483	0.118804	-2.14204	0.0608194
P2P3	-Pi,0.5%Suc	30 uM,0%Suc	-0.701942	0.0793326	-8.84809	9.81166e-06
P2P3	+Pi,0.5%Suc	30 uM,0%Suc	-0.503757	0.100249	-5.02506	0.00071415
P3I1	-Pi,0.5%Suc	100 uM,0%Suc	0.0806962	0.0896871	0.899752	0.391691
P3I1	+Pi,0.5%Suc	100 uM,0%Suc	-0.266349	0.0729133	-3.65296	0.00529309
P3I1	-Pi,0.5%Suc	30 uM,0%Suc	0.13966	0.0697343	2.00274	0.076215
P3I1	+Pi,0.5%Suc	30 uM,0%Suc	-0.182147	0.0556227	-3.27468	0.00961055
I1I2	-Pi,0.5%Suc	100 uM,0%Suc	-0.0228177	0.0757479	-0.301232	0.770081
I1I2	+Pi,0.5%Suc	100 uM,0%Suc	-0.273339	0.042027	-6.50388	0.000110949
I1I2	-Pi,0.5%Suc	30 uM,0%Suc	-0.805371	0.149026	-5.40425	0.000430608
I1I2	+Pi,0.5%Suc	30 uM,0%Suc	-1.03606	0.222407	-4.65842	0.00118788
I2I3	-Pi,0.5%Suc	100 uM,0%Suc	-0.0621534	0.0860743	-0.72209	0.488575
I2I3	+Pi,0.5%Suc	100 uM,0%Suc	-0.171426	0.0637477	-2.68913	0.0248319
I2I3	-Pi,0.5%Suc	30 uM,0%Suc	-1.09652	0.332369	-3.29912	0.00924287
I2I3	+Pi,0.5%Suc	30 uM,0%Suc	-1.0394	0.31153	-3.33645	0.00870924
I3N1	-Pi,0.5%Suc	100 uM,0%Suc	-0.138001	0.0699548	-1.97272	0.0799914
I3N1	+Pi,0.5%Suc	100 uM,0%Suc	0.099489	0.109617	0.907607	0.387742
I3N1	-Pi,0.5%Suc	30 uM,0%Suc	-1.43368	0.183913	-7.79541	2.72084e-05
I3N1	+Pi,0.5%Suc	30 uM,0%Suc	-1.23594	0.174286	-7.09143	5.72022e-05
N1N2	-Pi,0.5%Suc	100 uM,0%Suc	-0.3826	0.0801677	-4.77249	0.00101183
N1N2	+Pi,0.5%Suc	100 uM,0%Suc	-0.277371	0.106072	-2.61494	0.0280425
N1N2	-Pi,0.5%Suc	30 uM,0%Suc	-2.80414	0.115463	-24.286	1.6284e-09
N1N2	+Pi,0.5%Suc	30 uM,0%Suc	-2.42674	0.0788697	-30.769	1.98169e-10
N2N3	-Pi,0.5%Suc	100 uM,0%Suc	-0.27419	0.0578628	-4.73862	0.00106098
N2N3	+Pi,0.5%Suc	100 uM,0%Suc	-0.109175	0.0797605	-1.36879	0.204256
N2N3	-Pi,0.5%Suc	30 uM,0%Suc	-2.04438	0.13116	-15.587	8.07937e-08
N2N3	+Pi,0.5%Suc	30 uM,0%Suc	-2.12877	0.137577	-15.4733	8.6111e-08
P1N3	-Pi,0.5%Suc	100 uM,0%Suc	-0.208743	0.0663197	-3.14753	0.0117843
P1N3	+Pi,0.5%Suc	100 uM,0%Suc	-0.152124	0.0613925	-2.47788	0.0351131
P1N3	-Pi,0.5%Suc	30 uM,0%Suc	-2.18051	0.207249	-10.5212	2.34061e-06
P1N3	+Pi,0.5%Suc	30 uM,0%Suc	-2.00174	0.144095	-13.8918	2.193e-07
P1I1	-Pi,0.5%Suc	100 uM,0%Suc	-0.266087	0.0798126	-3.3339	0.00874458
P1I1	+Pi,0.5%Suc	100 uM,0%Suc	0.0228095	0.0979862	0.232783	0.821138
P1I1	-Pi,0.5%Suc	30 uM,0%Suc	-1.58275	0.175137	-9.0372	8.25468e-06
P1I1	+Pi,0.5%Suc	30 uM,0%Suc	-1.57708	0.143719	-10.9734	1.64314e-06
P2I1	-Pi,0.5%Suc	100 uM,0%Suc	-0.162858	0.0717572	-2.26957	0.049398
P2I1	+Pi,0.5%Suc	100 uM,0%Suc	-0.136179	0.103543	-1.31519	0.220966
P2I1	-Pi,0.5%Suc	30 uM,0%Suc	-0.447948	0.088768	-5.04628	0.000693843
P2I1	+Pi,0.5%Suc	30 uM,0%Suc	-1.8601	0.29621	-6.27969	0.00014443
P1P3	-Pi,0.5%Suc	100 uM,0%Suc	-0.0381294	0.0380698	-1.00156	0.34272
P1P3	+Pi,0.5%Suc	100 uM,0%Suc	0.033449	0.0967536	0.345713	0.737502
P1P3	-Pi,0.5%Suc	30 uM,0%Suc	-0.222971	0.0621232	-3.58918	0.00584628
P1P3	+Pi,0.5%Suc	30 uM,0%Suc	0.129973	0.0526324	2.46944	0.0356028
P2N3	-Pi,0.5%Suc	100 uM,0%Suc	-0.578669	0.140326	-4.12374	0.00258347
P2N3	+Pi,0.5%Suc	100 uM,0%Suc	-0.276766	0.0448636	-6.16905	0.00016489
P2N3	-Pi,0.5%Suc	30 uM,0%Suc	-3.24287	0.147717	-21.9532	3.98571e-09
P2N3	+Pi,0.5%Suc	30 uM,0%Suc	-2.69982	0.144562	-18.6758	1.65991e-08
P3N3	-Pi,0.5%Suc	100 uM,0%Suc	-0.635982	0.125196	-5.07988	0.000662945
P3N3	+Pi,0.5%Suc	100 uM,0%Suc	-0.520291	0.0688225	-7.55989	3.4685e-05
P3N3	-Pi,0.5%Suc	30 uM,0%Suc	-2.09482	0.301701	-6.94336	6.73408e-05
P3N3	+Pi,0.5%Suc	30 uM,0%Suc	-1.58163	0.213702	-7.4011	4.09863e-05
