# Supplementary material for: Design of synthetic bacterial communities for predictable plant phenotypes
Source: PLoS Biol. 2018 Feb 20;16(2):e2003962. doi: 10.1371/journal.pbio.2003962 (PMC5819758; doi:10.1371/journal.pbio.2003962)
Supplement: S7 Table — In the Table, tab (a) (Cluster assignments) contains the 17,106 most variably expressed genes in A. thaliana seedlings in our RNA-Seq experiment in response to different bacterial synthetic communities. Genes are clustered according to their relative expression profiles from all samples with a given bacterial treatment in each condition. The table indicates the cluster assignment for each gene. Tabs (b)–(h) show the GO enrichment analysis for each cluster. Analysis was performed in the PlantGSEA web platform. Each tab contains the following information: descriptive name of the GO category (Description), ID in the GO database (GO ID), the total number of A. thaliana genes annotated with the corresponding GO term (Total), the number of A. thaliana genes in the corresponding cluster annotated with the corresponding GO term (Found), p-value of the enrichment test (p-value), and the adjusted p-value for multiple testing, using the Benjamini-Hochberg method (q-value). See also S9A Fig, RNA-Seq clustering. Col-0, Columbia-0; GO, gene ontology; GO ID, GO identifier; RNA-Seq, RNA sequencing. (XLSX) [file pbio.2003962.s019.xlsx]

## Sheet: Legend
S7 Table. Gene Ontology (GO) enrichment analysis of genes differentially expressed in Arabidopsis Col-0 in response to different bacterial synthetic communities. In the Table, tab a) (Cluster assignments) contains the 17106 most variably expressed genes in Arabidopsis seedlings in our RNA-Seq experiment in response to different bacterial synthetic communities. Genes are clustered according to the…

## Sheet: a) Cluster assignments
Gene	Cluster
AT3G04300	c1
AT1G15520	c1
AT2G29470	c1
AT5G13080	c1
AT1G66600	c1
AT2G47190	c1
AT4G11370	c1
AT2G15760	c1
AT4G28085	c1
AT3G57460	c1
AT1G05010	c1
AT3G15356	c1
AT3G16530	c1
AT3G51430	c1
AT3G48890	c1
AT2G04400	c1
AT5G17990	c1
AT4G34180	c1
AT5G26340	c1
AT1G79680	c1
AT2G26560	c1
AT1G28190	c1
AT1G25220	c1
AT5G54810	c1
AT3G14620	c1
AT5G12890	c1
AT3G55740	c1
AT3G28480	c1
AT3G45620	c1
AT4G12070	c1
AT1G75170	c1
AT1G65690	c1
AT1G22180	c1
AT3G28940	c1
AT5G61160	c1
AT3G21520	c1
AT2G02010	c1
AT5G56960	c1
AT4G13040	c1
AT4G30910	c1
AT2G45570	c1
AT1G61800	c1
AT1G59950	c1
AT3G49110	c1
AT4G35110	c1
AT5G28830	c1
AT1G49000	c1
AT4G11890	c1
AT2G29990	c1
AT5G12930	c1
AT5G46330	c1
AT4G15236	c1
AT4G39230	c1
AT4G23030	c1
AT2G29720	c1
AT5G23510	c1
AT3G26090	c1
AT2G31955	c1
AT5G48150	c1
AT1G14642	c1
AT1G76440	c1
AT1G15430	c1
AT3G57760	c1
AT4G23060	c1
AT1G47510	c1
AT5G02020	c1
AT4G18170	c1
AT3G56260	c1
AT5G09440	c1
AT1G61255	c1
AT4G21940	c1
AT1G69610	c1
AT3G23920	c1
AT4G05100	c1
AT3G50760	c1
AT5G20190	c1
AT4G31750	c1
AT2G22430	c1
AT2G28400	c1
AT5G03890	c1
AT5G44210	c1
AT3G04620	c1
AT4G28140	c1
AT1G20070	c1
AT1G64380	c1
AT5G62470	c1
AT1G77680	c1
AT2G20880	c1
AT3G54950	c1
AT5G60790	c1
AT1G13740	c1
AT1G01720	c1
AT1G77450	c1
AT5G63790	c1
AT2G41280	c1
AT3G47380	c1
AT5G26220	c1
AT5G48850	c1
AT1G53060	c1
AT2G28210	c1
AT3G17770	c1
AT1G48300	c1
AT3G56360	c1
AT4G00290	c1
AT2G36460	c1
AT5G19550	c1
AT4G03320	c1
AT1G32230	c1
AT5G23540	c1
AT5G58290	c1
AT1G69790	c1
AT3G08590	c1
AT2G47000	c1
AT5G56350	c1
AT1G02520	c1
AT3G47780	c1
AT1G72330	c1
AT3G13080	c1
AT3G50930	c1
AT4G17260	c1
AT3G59820	c1
AT4G27585	c1
AT1G32940	c1
AT5G48400	c1
AT1G13520	c1
AT5G11210	c1
AT5G55200	c1
AT5G20910	c1
AT5G20000	c1
AT4G29040	c1
AT4G38630	c1
AT1G74410	c1
AT2G19450	c1
AT1G15110	c1
AT2G24260	c1
AT4G01910	c1
AT1G18470	c1
AT1G62200	c1
AT1G04230	c1
AT1G10730	c1
AT3G01980	c1
AT1G26270	c1
AT1G08720	c1
AT1G67310	c1
AT1G78280	c1
AT1G53390	c1
AT1G63740	c1
AT1G53440	c1
AT2G22300	c1
AT5G06560	c1
AT3G07780	c1
AT3G12360	c1
AT5G25040	c1
AT1G10920	c1
AT1G74300	c1
AT5G62630	c1
AT5G53830	c1
AT1G06840	c1
AT5G49660	c1
AT5G65750	c1
AT3G56990	c1
AT5G02480	c1
AT3G27570	c1
AT1G03040	c1
AT4G05390	c1
AT3G27560	c1
AT1G58400	c1
AT3G04580	c1
AT3G14840	c1
AT4G16960	c1
AT4G36140	c1
AT5G45260	c1
AT1G69910	c1
AT3G50650	c1
AT1G10210	c1
AT3G15355	c1
AT1G34300	c1
AT1G54115	c1
AT2G17110	c1
AT1G74680	c1
AT4G05320	c1
AT5G20620	c1
AT1G14790	c1
AT3G55830	c1
AT1G08820	c1
AT1G50570	c1
AT3G19990	c1
AT1G49710	c1
AT5G24760	c1
AT4G17940	c1
AT4G22740	c1
AT2G36330	c1
AT5G47420	c1
AT5G02800	c1
AT2G33630	c1
AT5G06960	c1
AT1G07240	c1
AT1G34370	c1
AT1G78420	c1
AT4G17900	c1
AT2G02370	c1
AT4G26060	c1
AT1G04100	c1
AT1G06800	c1
AT1G30420	c1
AT1G03230	c1
AT3G02360	c1
AT4G26120	c1
AT5G65600	c1
AT5G67340	c1
AT1G74590	c1
AT4G25900	c1
AT2G43570	c1
AT3G63380	c1
AT5G33290	c1
AT5G54500	c1
AT2G24200	c1
AT5G40760	c1
AT2G45300	c1
AT1G51680	c1
AT2G37040	c1
AT1G48850	c1
AT2G30490	c1
AT1G02360	c1
AT3G24503	c1
AT4G21534	c1
AT1G65540	c1
AT2G21520	c1
AT5G55860	c1
AT1G13000	c1
AT4G26910	c1
AT5G18480	c1
AT1G03290	c1
AT3G20410	c1
AT3G47550	c1
AT1G03740	c1
AT5G18490	c1
AT3G22260	c1
AT5G23520	c1
AT1G67800	c1
AT5G04930	c1
AT4G33430	c1
AT5G57035	c1
AT2G20320	c1
AT1G52780	c1
AT4G11850	c1
AT3G48760	c1
AT5G44290	c1
AT1G01550	c1
AT2G30440	c1
AT3G26020	c1
AT4G35310	c1
AT2G17760	c1
AT3G21630	c1
AT4G23850	c1
AT5G13860	c1
AT4G12120	c1
AT2G38290	c1
AT1G17290	c1
AT5G11670	c1
AT1G62305	c1
AT3G19260	c1
AT5G22350	c1
AT5G65240	c1
AT5G10190	c1
AT4G24290	c1
AT5G12480	c1
AT3G59660	c1
AT5G21090	c1
AT1G05065	c1
AT1G07901	c1
AT4G17695	c1
AT4G11470	c1
AT1G14540	c1
AT5G64905	c1
AT1G23830	c1
AT1G18570	c1
AT1G74650	c1
AT1G69520	c1
AT1G27020	c1
AT5G61520	c1
AT5G02630	c1
AT1G21100	c1
AT1G21120	c1
AT1G21130	c1
AT4G22690	c1
AT1G21110	c1
AT5G57220	c1
AT5G40170	c1
AT3G16030	c1
AT5G39020	c1
AT1G70520	c1
AT4G36150	c1
AT4G27300	c1
AT4G29050	c1
AT1G74780	c1
AT5G56270	c1
AT2G20950	c1
AT3G62150	c1
AT5G66900	c1
AT2G31820	c1
AT4G28400	c1
AT1G07390	c1
AT1G74790	c1
AT1G50180	c1
AT1G55910	c1
AT1G71040	c1
AT1G61380	c1
AT3G04110	c1
AT5G55530	c1
AT5G20050	c1
AT2G39660	c1
AT5G61560	c1
AT2G28930	c1
AT3G53280	c1
AT4G03020	c1
AT4G24240	c1
AT5G03700	c1
AT1G70530	c1
AT4G28390	c1
AT1G55850	c1
AT1G55920	c1
AT3G14990	c1
AT4G13180	c1
AT1G21670	c1
AT5G13490	c1
AT1G60730	c1
AT2G15480	c1
AT4G01870	c1
AT2G30140	c1
AT4G22530	c1
AT4G27830	c1
AT5G59540	c1
AT1G28360	c1
AT1G16510	c1
AT2G04040	c1
AT3G04420	c1
AT2G23770	c1
AT4G00970	c1
AT1G08930	c1
AT5G54710	c1
AT5G54720	c1
AT1G56140	c1
AT1G13210	c1
AT2G37940	c1
AT5G48540	c1
AT2G44490	c1
AT4G23190	c1
AT4G09570	c1
AT1G07000	c1
AT4G39640	c1
AT2G13800	c1
AT5G02290	c1
AT5G61210	c1
AT3G48090	c1
AT1G24150	c1
AT3G17700	c1
AT2G17220	c1
AT1G03370	c1
AT2G13790	c1
AT1G51805	c1
AT3G56050	c1
AT4G02420	c1
AT1G66910	c1
AT4G01090	c1
AT1G31540	c1
AT5G38990	c1
AT2G40270	c1
AT5G04720	c1
AT5G53130	c1
AT5G62560	c1
AT3G45650	c1
AT3G52450	c1
AT3G47820	c1
AT5G11000	c1
AT5G39030	c1
AT3G08870	c1
AT1G65800	c1
AT2G23200	c1
AT2G31880	c1
AT4G08850	c1
AT4G01010	c1
AT1G14370	c1
AT3G19010	c1
AT2G31865	c1
AT5G48657	c1
AT4G38560	c1
AT4G14365	c1
AT4G23170	c1
AT3G55950	c1
AT1G24145	c1
AT5G58940	c1
AT5G61010	c1
AT3G29400	c1
AT3G59700	c1
AT4G01700	c1
AT5G67450	c1
AT2G19130	c1
AT3G28450	c1
AT1G11310	c1
AT3G57330	c1
AT1G07630	c1
AT2G28890	c1
AT1G69730	c1
AT2G46440	c1
AT4G14400	c1
AT4G36090	c1
AT1G01340	c1
AT5G19250	c1
AT1G11200	c1
AT3G04480	c1
AT4G17570	c1
AT1G16500	c1
AT2G26170	c1
AT5G62680	c1
AT2G46150	c1
AT2G46620	c1
AT2G36580	c1
AT5G42050	c1
AT3G57630	c1
AT4G37640	c1
AT4G22980	c1
AT5G38240	c1
AT1G67850	c1
AT3G26600	c1
AT2G11520	c1
AT5G45110	c1
AT3G13050	c1
AT3G51890	c1
AT5G11970	c1
AT2G05320	c1
AT4G04695	c1
AT2G26650	c1
AT5G04860	c1
AT5G16170	c1
AT4G04700	c1
AT4G21903	c1
AT5G39760	c1
AT3G54420	c1
AT5G60270	c1
AT2G15390	c1
AT3G49350	c1
AT5G42010	c1
AT2G18690	c1
AT3G01290	c1
AT1G07620	c1
AT3G28850	c1
AT4G01540	c1
AT3G49210	c1
AT1G44100	c1
AT3G26590	c1
AT4G02860	c1
AT4G09750	c1
AT2G21190	c1
AT1G16210	c1
AT5G50960	c1
AT1G71840	c1
AT4G24940	c1
AT1G66070	c1
AT4G18040	c1
AT1G31440	c1
AT4G35040	c1
AT1G74230	c1
AT2G17870	c1
AT3G20170	c1
AT1G45180	c1
AT1G55690	c1
AT5G57015	c1
AT4G14350	c1
AT5G41790	c1
AT4G32551	c1
AT5G17020	c1
AT1G21080	c1
AT1G18900	c1
AT5G04870	c1
AT1G18070	c1
AT2G18790	c1
AT2G17480	c1
AT1G42470	c1
AT5G38560	c1
AT2G21120	c1
AT4G02600	c1
AT1G23950	c1
AT2G33845	c1
AT4G11530	c1
AT1G13110	c1
AT5G49760	c1
AT1G79670	c1
AT5G35370	c1
AT4G12010	c1
AT3G17410	c1
AT1G25390	c1
AT2G02220	c1
AT4G23270	c1
AT3G04210	c1
AT3G46540	c1
AT3G07800	c1
AT5G19080	c1
AT3G47670	c1
AT5G50200	c1
AT5G53110	c1
AT5G37600	c1
AT5G54160	c1
AT2G27920	c1
AT5G07820	c1
AT5G60280	c1
AT2G31020	c1
AT4G25070	c1
AT4G37900	c1
AT2G21850	c1
AT1G30900	c1
AT4G20110	c1
AT1G30370	c1
AT1G30700	c1
AT2G46750	c1
AT1G58602	c1
AT5G11250	c1
AT5G36930	c1
AT1G16260	c1
AT1G66970	c1
AT1G69550	c1
AT4G11900	c1
AT5G07300	c1
AT1G02120	c1
AT4G19990	c1
AT1G33390	c1
AT1G14740	c1
AT5G20990	c1
AT4G29900	c1
AT5G45250	c1
AT5G65200	c1
AT1G80510	c1
AT3G54100	c1
AT3G13380	c1
AT1G02170	c1
AT4G23470	c1
AT3G57890	c1
AT1G09020	c1
AT5G18520	c1
AT4G12650	c1
AT5G17920	c1
AT5G25100	c1
AT5G35160	c1
AT1G43690	c1
AT1G48900	c1
AT2G17190	c1
AT2G01970	c1
AT4G31490	c1
AT5G10840	c1
AT5G61970	c1
AT3G52640	c1
AT4G39170	c1
AT1G21700	c1
AT2G32910	c1
AT1G67680	c1
AT2G33730	c1
AT3G51050	c1
AT3G58110	c1
AT5G55670	c1
AT3G47930	c1
AT2G42230	c1
AT5G67470	c1
AT3G16630	c1
AT1G60070	c1
AT2G40730	c1
AT3G08930	c1
AT3G07330	c1
AT1G05960	c1
AT1G08190	c1
AT1G28240	c1
AT5G41150	c1
AT3G51640	c1
AT4G24100	c1
AT3G07020	c1
AT1G01440	c1
AT3G24550	c1
AT3G51550	c1
AT1G28340	c1
AT2G32810	c1
AT1G68720	c1
AT2G06210	c1
AT5G12430	c1
AT5G11700	c1
AT5G20490	c1
AT1G36160	c1
AT3G14270	c1
AT4G03080	c1
AT1G24190	c1
AT5G15020	c1
AT3G19190	c1
AT5G64070	c1
AT1G54490	c1
AT4G02570	c1
AT4G34450	c1
AT1G12470	c1
AT1G02890	c1
AT1G63770	c1
AT1G48410	c1
AT5G18230	c1
AT3G17750	c1
AT3G60350	c1
AT1G11660	c1
AT1G25490	c1
AT1G76140	c1
AT2G05170	c1
AT5G49830	c1
AT1G67930	c1
AT1G48760	c1
AT5G57460	c1
AT2G15530	c1
AT3G55320	c1
AT4G12770	c1
AT2G33435	c1
AT2G29080	c1
AT5G08450	c1
AT1G59610	c1
AT3G01780	c1
AT1G23230	c1
AT4G11270	c1
AT3G44340	c1
AT4G32640	c1
AT3G60860	c1
AT5G04560	c1
AT1G16710	c1
AT5G13530	c1
AT5G47480	c1
AT3G51120	c1
AT1G24300	c1
AT1G27430	c1
AT3G11960	c1
AT3G33530	c1
AT4G01290	c1
AT5G58410	c1
AT1G58230	c1
AT2G46560	c1
AT5G24350	c1
AT5G15680	c1
AT3G07100	c1
AT4G00450	c1
AT1G55325	c1
AT3G01460	c1
AT1G03060	c1
AT4G31570	c1
AT4G36080	c1
AT3G02260	c1
AT5G23110	c1
AT1G55860	c1
AT1G70320	c1
AT2G17930	c1
AT2G28290	c1
AT3G52250	c1
AT3G59770	c1
AT1G79000	c1
AT2G46020	c1
AT4G01810	c1
AT3G13060	c1
AT2G02560	c1
AT3G11910	c1
AT2G31960	c1
AT5G06600	c1
AT5G15400	c1
AT1G78920	c1
AT5G02310	c1
AT5G09860	c1
AT3G46790	c1
AT5G15920	c1
AT4G32520	c1
AT3G11710	c1
AT1G25350	c1
AT5G26830	c1
AT4G23540	c1
AT2G31740	c1
AT4G16143	c1
AT5G64960	c1
AT1G26370	c1
AT1G23780	c1
AT2G34970	c1
AT4G21670	c1
AT2G29190	c1
AT5G41770	c1
AT3G22330	c1
AT4G11160	c1
AT5G49880	c1
AT4G36520	c1
AT4G26630	c1
AT5G55660	c1
AT1G44910	c1
AT3G06010	c1
AT1G03365	c1
AT3G60740	c1
AT4G00990	c1
AT3G23780	c1
AT4G14900	c1
AT1G75820	c1
AT4G32880	c1
AT5G63950	c1
AT3G17340	c1
AT5G18620	c1
AT5G62410	c1
AT3G49600	c1
AT5G06460	c1
AT5G13680	c1
AT5G40480	c1
AT3G58510	c1
AT5G26710	c1
AT1G16270	c1
AT1G79930	c1
AT2G13540	c1
AT5G27540	c1
AT5G58440	c1
AT1G13020	c1
AT3G54760	c1
AT5G28740	c1
AT4G34430	c1
AT1G76810	c1
AT4G32620	c1
AT3G53110	c1
AT4G39690	c1
AT1G66530	c1
AT5G17930	c1
AT4G22285	c1
AT3G01610	c1
AT5G22010	c1
AT1G76350	c1
AT5G08170	c1
AT4G10790	c1
AT2G02040	c1
AT4G05160	c1
AT3G14830	c1
AT1G50600	c1
AT5G60160	c1
AT1G52320	c1
AT4G02715	c1
AT1G27320	c1
AT3G23640	c1
AT4G15840	c1
AT5G36210	c1
AT5G13640	c1
AT5G59710	c1
AT3G56640	c1
AT4G30000	c1
AT1G22610	c1
AT5G38640	c1
AT3G06480	c1
AT5G51660	c1
AT1G14850	c1
AT2G38770	c1
AT1G80680	c1
AT4G30990	c1
AT3G55160	c1
AT1G74260	c1
AT1G14610	c1
AT3G52140	c1
AT5G27650	c1
AT3G13990	c1
AT5G51300	c1
AT1G10390	c1
AT1G26110	c1
AT1G76950	c1
AT3G13290	c1
AT1G30330	c1
AT1G55540	c1
AT2G48110	c1
AT2G40980	c1
AT1G12270	c1
AT3G22520	c1
AT3G07610	c1
AT1G30470	c1
AT3G06720	c1
AT5G65720	c1
AT1G04860	c1
AT1G79090	c1
AT1G06220	c1
AT2G31660	c1
AT5G53480	c1
AT3G10650	c1
AT5G57870	c1
AT5G46070	c1
AT1G68790	c1
AT4G31880	c1
AT2G17410	c1
AT3G19740	c1
AT1G19110	c1
AT1G67890	c1
AT1G10900	c1
AT3G54460	c1
AT5G12850	c1
AT3G21290	c1
AT3G46960	c1
AT2G27170	c1
AT1G59890	c1
AT5G54440	c1
AT2G25170	c1
AT4G38760	c1
AT2G26780	c1
AT5G15540	c1
AT3G23900	c1
AT1G33410	c1
AT4G33200	c1
AT1G31810	c1
AT3G21430	c1
AT1G79350	c1
AT3G12810	c1
AT1G77800	c1
AT2G03140	c1
AT2G03150	c1
AT3G54670	c1
AT5G53440	c1
AT3G15120	c1
AT1G24706	c1
AT2G13370	c1
AT1G32750	c1
AT1G79280	c1
AT1G65440	c1
AT5G47690	c1
AT3G26560	c1
AT2G41960	c1
AT4G10710	c1
AT1G72390	c1
AT5G20730	c1
AT5G24710	c1
AT2G26890	c1
AT2G45540	c1
AT1G20960	c1
AT4G35800	c1
AT1G80070	c1
AT4G38600	c1
AT5G47010	c1
AT3G13300	c1
AT3G60240	c1
AT2G25320	c1
AT1G58250	c1
AT1G21580	c1
AT5G61140	c1
AT1G48090	c1
AT4G15180	c1
AT1G77300	c1
AT2G16485	c1
AT3G50370	c1
AT4G24680	c1
AT1G08420	c1
AT1G17210	c1
AT5G65950	c1
AT2G18960	c1
AT4G14160	c1
AT5G46210	c1
AT4G05420	c1
AT3G16830	c1
AT4G10320	c1
AT1G08620	c1
AT5G07940	c1
AT5G07980	c1
AT1G43850	c1
AT5G19400	c1
AT1G71010	c1
AT4G30100	c1
AT2G27210	c1
AT4G12780	c1
AT2G41520	c1
AT5G22770	c1
AT3G63070	c1
AT3G15880	c1
AT2G36850	c1
AT3G07160	c1
AT4G17330	c1
AT5G53460	c1
AT4G03550	c1
AT5G51200	c1
AT5G38840	c1
AT1G17980	c1
AT3G03940	c1
AT5G49930	c1
AT3G62900	c1
AT1G24460	c1
AT4G39850	c1
AT4G08350	c1
AT5G16270	c1
AT1G08600	c1
AT2G16950	c1
AT2G47980	c1
AT2G39260	c1
AT3G06400	c1
AT1G60995	c1
AT2G31370	c1
AT5G16520	c1
AT1G43190	c1
AT1G72550	c1
AT5G53620	c1
AT1G16350	c1
AT2G27110	c1
AT3G03110	c1
AT5G56730	c1
AT1G25570	c1
AT1G72560	c1
AT1G31230	c1
AT4G26300	c1
AT5G17530	c1
AT5G12040	c1
AT5G14590	c1
AT1G60890	c1
AT1G09060	c1
AT4G19500	c1
AT5G10490	c1
AT1G04810	c1
AT2G25730	c1
AT4G17140	c1
AT3G61690	c1
AT4G31160	c1
AT2G21390	c1
AT2G32730	c1
AT1G62020	c1
AT5G11560	c1
AT3G11130	c1
AT3G63460	c1
AT4G38200	c1
AT5G39500	c1
AT5G13390	c1
AT2G36910	c1
AT1G49340	c1
AT5G03280	c1
AT4G33650	c1
AT5G58100	c1
AT1G80490	c1
AT5G20660	c1
AT1G10130	c1
AT3G09090	c1
AT4G15080	c1
AT4G23640	c1
AT1G07705	c1
AT1G50380	c1
AT2G41700	c1
AT4G04920	c1
AT5G17890	c1
AT1G65380	c1
AT1G49470	c1
AT3G23430	c1
AT1G72480	c1
AT4G02150	c1
AT3G03305	c1
AT1G07920	c1
AT4G30190	c1
AT5G45480	c1
AT1G18880	c1
AT3G14920	c1
AT1G36280	c1
AT1G54610	c1
AT4G08810	c1
AT3G06550	c1
AT3G61130	c1
AT1G55170	c1
AT3G60830	c1
AT3G25545	c1
AT4G16850	c1
AT3G14470	c1
AT1G05570	c1
AT4G28710	c1
AT5G45510	c1
AT1G79380	c1
AT1G05630	c1
AT1G20780	c1
AT5G14230	c1
AT2G19110	c1
AT2G27090	c1
AT2G22090	c1
AT4G38250	c1
AT5G58060	c1
AT4G32040	c1
AT5G35200	c1
AT3G03720	c1
AT3G43230	c1
AT1G60420	c1
AT2G38020	c1
AT4G36630	c1
AT5G64440	c1
AT2G13560	c1
AT2G44100	c1
AT2G27600	c1
AT3G13772	c1
AT4G17830	c1
AT3G25800	c1
AT5G43940	c1
AT1G29150	c1
AT5G09810	c1
AT1G44820	c1
AT1G20200	c1
AT5G38470	c1
AT1G44170	c1
AT1G51710	c1
AT5G62530	c1
AT1G49670	c1
AT3G06860	c1
AT4G29010	c1
AT3G16090	c1
AT1G70330	c1
AT3G18060	c1
AT1G06290	c1
AT4G03560	c1
AT2G01980	c1
AT2G41740	c1
AT2G21410	c1
AT4G39080	c1
AT5G54870	c1
AT1G54710	c1
AT3G10360	c1
AT4G30097	c1
AT4G12670	c1
AT1G68910	c1
AT5G49580	c1
AT4G21350	c1
AT1G68070	c1
AT5G62740	c1
AT4G36380	c1
AT4G25570	c1
AT4G31130	c1
AT3G13410	c1
AT3G30390	c1
AT1G35470	c1
AT4G33740	c1
AT3G05270	c1
AT4G39870	c1
AT2G45260	c1
AT3G54290	c1
AT5G47870	c1
AT5G65780	c1
AT1G31470	c1
AT4G27780	c1
AT3G01100	c1
AT2G31260	c1
AT3G47730	c1
AT3G48170	c1
AT4G36760	c1
AT5G10270	c1
AT1G74740	c1
AT5G45900	c1
AT3G23540	c1
AT4G39140	c1
AT2G40380	c1
AT5G14310	c1
AT4G15410	c1
AT4G32140	c1
AT5G11980	c1
AT5G63110	c1
AT5G20680	c1
AT2G30740	c1
AT3G51580	c1
AT3G28720	c1
AT1G79940	c1
AT4G24330	c1
AT3G19950	c1
AT4G08960	c1
AT5G45800	c1
AT1G48210	c1
AT5G52540	c1
AT4G12250	c1
AT4G35870	c1
AT5G13890	c1
AT1G80010	c1
AT5G62640	c1
AT1G08370	c1
AT2G01600	c1
AT1G15130	c1
AT1G20110	c1
AT1G53590	c1
AT3G16340	c1
AT4G00440	c1
AT5G64220	c1
AT5G18830	c1
AT5G51630	c1
AT5G63930	c1
AT4G10590	c1
AT2G43490	c1
AT3G28430	c1
AT5G65290	c1
AT4G14950	c1
AT4G15470	c1
AT2G14720	c1
AT2G20010	c1
AT4G11800	c1
AT5G62000	c1
AT1G10050	c1
AT1G64060	c1
AT5G54650	c1
AT3G05050	c1
AT5G54830	c1
AT3G47060	c1
AT3G16270	c1
AT5G04020	c1
AT3G24180	c1
AT5G17910	c1
AT1G04780	c1
AT4G08180	c1
AT5G24360	c1
AT4G32285	c1
AT1G15780	c1
AT2G30110	c1
AT3G15730	c1
AT2G42010	c1
AT1G07510	c1
AT1G17440	c1
AT1G10580	c1
AT1G53050	c1
AT3G51620	c1
AT1G17070	c1
AT5G41360	c1
AT2G26460	c1
AT1G17820	c1
AT5G49530	c1
AT4G34280	c1
AT5G07290	c1
AT5G07970	c1
AT1G17110	c1
AT5G01400	c1
AT1G15060	c1
AT3G22270	c1
AT3G48060	c1
AT4G24560	c1
AT3G52120	c1
AT2G37520	c1
AT4G10730	c1
AT1G73730	c1
AT2G33700	c1
AT4G33080	c1
AT5G13160	c1
AT5G32470	c1
AT1G18910	c1
AT4G23650	c1
AT1G11390	c1
AT3G05670	c1
AT3G19240	c1
AT2G15560	c1
AT4G26750	c1
AT3G10800	c1
AT1G77500	c1
AT4G00570	c1
AT1G21380	c1
AT1G31130	c1
AT4G29440	c1
AT1G68690	c1
AT1G34260	c1
AT2G19710	c1
AT3G21295	c1
AT4G11670	c1
AT5G01960	c1
AT3G09100	c1
AT2G35510	c1
AT3G27260	c1
AT3G22380	c1
AT3G48050	c1
AT5G13590	c1
AT5G52530	c1
AT3G16940	c1
AT5G22450	c1
AT1G59820	c1
AT1G61140	c1
AT4G32010	c1
AT1G25280	c1
AT5G48385	c1
AT3G12620	c1
AT5G19000	c1
AT2G47210	c1
AT3G05545	c1
AT2G43790	c1
AT5G54310	c1
AT2G41490	c1
AT1G67530	c1
AT1G76900	c1
AT5G56650	c1
AT5G10630	c1
AT5G50230	c1
AT5G28350	c1
AT3G18480	c1
AT5G05570	c1
AT1G23900	c1
AT4G23460	c1
AT1G17500	c1
AT5G36880	c1
AT2G17790	c1
AT5G35180	c1
AT1G22860	c1
AT3G59290	c1
AT5G22780	c1
AT1G25540	c1
AT1G66340	c1
AT2G32850	c1
AT5G08560	c1
AT2G28360	c1
AT3G23280	c1
AT1G60490	c1
AT2G32700	c1
AT3G17205	c1
AT1G19870	c1
AT5G11850	c1
AT1G21170	c1
AT1G69340	c1
AT2G19950	c1
AT5G64813	c1
AT4G19180	c1
AT1G14670	c1
AT4G24840	c1
AT4G37120	c1
AT1G32130	c1
AT5G50380	c1
AT1G61180	c1
AT4G04720	c1
AT1G50360	c1
AT5G46340	c1
AT2G23980	c1
AT3G28690	c1
AT3G46220	c1
AT3G61960	c1
AT3G51310	c1
AT3G54010	c1
AT3G15920	c1
AT1G67490	c1
AT5G61190	c1
AT1G76320	c1
AT1G68920	c1
AT3G57570	c1
AT3G03810	c1
AT5G16560	c1
AT1G18580	c1
AT3G42950	c1
AT1G77770	c1
AT3G01650	c1
AT3G56110	c1
AT5G54430	c1
AT2G37035	c1
AT1G18720	c1
AT3G04090	c1
AT3G63310	c1
AT4G02340	c1
AT4G25230	c1
AT5G13550	c1
AT2G45140	c1
AT3G62580	c1
AT1G65430	c1
AT2G14740	c1
AT3G11880	c1
AT1G44750	c1
AT1G62310	c1
AT1G05120	c1
AT4G10930	c1
AT4G08320	c1
AT3G06540	c1
AT5G10610	c1
AT4G04910	c1
AT3G01720	c1
AT5G49680	c1
AT1G19360	c1
AT5G43060	c1
AT1G34130	c1
AT5G60640	c1
AT5G66680	c1
AT2G01720	c1
AT4G21150	c1
AT5G41950	c1
AT3G04080	c1
AT1G14830	c1
AT5G05010	c1
AT2G17980	c1
AT3G53520	c1
AT3G09570	c1
AT1G14000	c1
AT1G54320	c1
AT2G47970	c1
AT5G55610	c1
AT1G17760	c1
AT2G38840	c1
AT5G19420	c1
AT4G39270	c1
AT5G66950	c1
AT3G07810	c1
AT5G61960	c1
AT1G07670	c1
AT5G35430	c1
AT3G13320	c1
AT3G15430	c1
AT4G25360	c1
AT3G57650	c1
AT5G61840	c1
AT4G10570	c1
AT1G08510	c1
AT1G20260	c1
AT3G23660	c1
AT1G31480	c1
AT5G42870	c1
AT4G36890	c1
AT5G52560	c1
AT1G09270	c1
AT1G79340	c1
AT1G15340	c1
AT3G16110	c1
AT3G54610	c1
AT3G56760	c1
AT1G51590	c1
AT3G21160	c1
AT1G33360	c1
AT2G26510	c1
AT4G02640	c1
AT2G43070	c1
AT3G07180	c1
AT1G16970	c1
AT2G43980	c1
AT3G47700	c1
AT5G11390	c1
AT1G43620	c1
AT4G19185	c1
AT1G04910	c1
AT5G48020	c1
AT2G15860	c1
AT2G30710	c1
AT5G21010	c1
AT1G65020	c1
AT3G03610	c1
AT1G17590	c1
AT5G48440	c1
AT2G36670	c1
AT5G18780	c1
AT3G21640	c1
AT1G80290	c1
AT1G21370	c1
AT2G20780	c1
AT5G58730	c1
AT4G17010	c1
AT2G47760	c1
AT3G20800	c1
AT5G40580	c1
AT5G63260	c1
AT3G13445	c1
AT3G27930	c1
AT4G16845	c1
AT1G64470	c1
AT1G31120	c1
AT4G38900	c1
AT2G04100	c1
AT5G48370	c1
AT1G67560	c1
AT4G16110	c1
AT2G24360	c1
AT4G28570	c1
AT2G01650	c1
AT1G61250	c1
AT4G29810	c1
AT5G26751	c1
AT4G36210	c1
AT5G49570	c1
AT5G04170	c1
AT1G70160	c1
AT5G59420	c1
AT2G04620	c1
AT5G34930	c1
AT4G35580	c1
AT1G54170	c1
AT1G34190	c1
AT3G02520	c1
AT5G42140	c1
AT2G27150	c1
AT3G18370	c1
AT5G57580	c1
AT4G25720	c1
AT1G71190	c1
AT5G19980	c1
AT5G05460	c1
AT1G52760	c1
AT1G62810	c1
AT3G51980	c1
AT1G75990	c1
AT2G03510	c1
AT3G13235	c1
AT2G21270	c1
AT2G25650	c1
AT3G53390	c1
AT4G11560	c1
AT5G04270	c1
AT5G10110	c1
AT5G24310	c1
AT3G05280	c1
AT1G30890	c1
AT1G80950	c1
AT4G01410	c1
AT1G27600	c1
AT4G38230	c1
AT3G56580	c1
AT1G10630	c1
AT2G14835	c1
AT5G47940	c1
AT1G31830	c1
AT3G07890	c1
AT1G16560	c1
AT1G50430	c1
AT5G28850	c1
AT5G59840	c1
AT4G34960	c1
AT2G38580	c1
AT3G07950	c1
AT1G04630	c1
AT5G05780	c1
AT1G70490	c1
AT2G47170	c1
AT1G13060	c1
AT5G35590	c1
AT5G05620	c1
AT5G45290	c1
AT1G18840	c1
AT1G74690	c1
AT3G15410	c1
AT1G10670	c1
AT2G44160	c1
AT3G23820	c1
AT1G20440	c1
AT3G23810	c1
AT3G17130	c1
AT4G38400	c1
AT4G18270	c1
AT5G55400	c1
AT1G60790	c1
AT1G66350	c1
AT2G39250	c1
AT4G15450	c1
AT1G09180	c1
AT2G28900	c1
AT2G42530	c1
AT1G21790	c1
AT4G34650	c1
AT1G76180	c1
AT2G37170	c1
AT1G30260	c1
AT1G78210	c1
AT4G01026	c1
AT1G22470	c1
AT5G24155	c1
AT1G08570	c1
AT5G52660	c1
AT5G01260	c1
AT1G79520	c1
AT5G25220	c1
AT1G01140	c1
AT1G46768	c1
AT5G54960	c1
AT5G64230	c1
AT3G58790	c1
AT1G76580	c1
AT5G63370	c1
AT3G04010	c1
AT3G05220	c1
AT1G17750	c1
AT3G47960	c1
AT4G15130	c1
AT1G19300	c1
AT4G10390	c1
AT5G52320	c1
AT1G19180	c1
AT5G56980	c1
AT1G61890	c1
AT2G46510	c1
AT4G27560	c1
AT5G13200	c1
AT1G72520	c1
AT1G20510	c1
AT4G17230	c1
AT2G44840	c1
AT5G59730	c1
AT1G07150	c1
AT2G25460	c1
AT3G19580	c1
AT5G07070	c1
AT5G22250	c1
AT1G28370	c1
AT2G30020	c1
AT2G26530	c1
AT5G59550	c1
AT5G49520	c1
AT1G29340	c1
AT2G22500	c1
AT5G52050	c1
AT1G73080	c1
AT1G80840	c1
AT4G35480	c1
AT3G20500	c1
AT4G18280	c1
AT1G02270	c1
AT5G19070	c1
AT4G35985	c1
AT1G10090	c1
AT2G17840	c1
AT1G51090	c1
AT1G09950	c1
AT4G34410	c1
AT4G36010	c1
AT4G27840	c1
AT5G13880	c1
AT3G09032	c1
AT3G06760	c1
AT5G40460	c1
AT1G66500	c1
AT5G43620	c1
AT4G32030	c1
AT5G48655	c1
AT1G57610	c1
AT4G38810	c1
AT4G35550	c1
AT5G59480	c1
AT2G23340	c1
AT4G37790	c1
AT1G07870	c1
AT2G38640	c1
AT1G50640	c1
AT3G20310	c1
AT4G27652	c1
AT1G61340	c1
AT3G50260	c1
AT3G62260	c1
AT1G78070	c1
AT4G12000	c1
AT1G75860	c1
AT4G22780	c1
AT4G31800	c1
AT5G01100	c1
AT5G11650	c1
AT5G62070	c1
AT1G02400	c1
AT1G71697	c1
AT5G18400	c1
AT5G40540	c1
AT1G22190	c1
AT3G02800	c1
AT1G42990	c1
AT1G50740	c1
AT1G19020	c1
AT3G26980	c1
AT1G18300	c1
AT2G32190	c1
AT2G32210	c1
AT4G39670	c1
AT5G42380	c1
AT4G33985	c1
AT5G45750	c1
AT1G18740	c1
AT3G03020	c1
AT1G19380	c1
AT5G13190	c1
AT4G25380	c1
AT4G25434	c1
AT1G28470	c1
AT1G78340	c1
AT2G29490	c1
AT3G04670	c1
AT2G29480	c1
AT5G19440	c1
AT5G13750	c1
AT5G64250	c1
AT1G14130	c1
AT5G59510	c1
AT4G32950	c1
AT1G78050	c1
AT3G12700	c1
AT4G33420	c1
AT1G04130	c1
AT4G14746	c1
AT4G28480	c1
AT5G22060	c1
AT3G07090	c1
AT3G09440	c1
AT1G60710	c1
AT3G52220	c1
AT2G24500	c1
AT4G02890	c1
AT4G27680	c1
AT5G48970	c1
AT5G42000	c1
AT1G72750	c1
AT4G19140	c1
AT5G59050	c1
AT2G41170	c1
AT5G45950	c1
AT2G47485	c1
AT4G00360	c1
AT4G24510	c1
AT1G51440	c1
AT1G29670	c1
AT1G28010	c1
AT1G49430	c1
AT4G39330	c1
AT1G17840	c1
AT4G33220	c1
AT5G13400	c1
AT1G01600	c1
AT2G35760	c1
AT1G25425	c1
AT5G61570	c1
AT1G35180	c1
AT5G06440	c1
AT1G43310	c1
AT2G13422	c1
AT5G58320	c1
AT2G26570	c1
AT2G25430	c1
AT5G40340	c1
AT5G37540	c1
AT1G28200	c1
AT5G58020	c1
AT4G03820	c1
AT1G54830	c1
AT4G25680	c1
AT2G44500	c1
AT5G01830	c1
AT3G62010	c1
AT1G17340	c1
AT5G07350	c1
AT2G20810	c1
AT1G17370	c1
AT1G77260	c1
AT1G30250	c1
AT2G34355	c1
AT5G03490	c1
AT2G47730	c1
AT3G11330	c1
AT3G55430	c1
AT4G18010	c1
AT3G17800	c1
AT3G21750	c1
AT3G11660	c1
AT5G35460	c1
AT5G64170	c1
AT3G46450	c1
AT5G04410	c1
AT4G28600	c1
AT2G41900	c1
AT2G22010	c1
AT1G03080	c1
AT3G04240	c1
AT1G73740	c1
AT2G40830	c1
AT4G34480	c1
AT5G05850	c1
AT3G55130	c1
AT1G18890	c1
AT5G57710	c1
AT1G08800	c1
AT3G57880	c1
AT4G03430	c1
AT2G39720	c1
AT3G09920	c1
AT4G12020	c1
AT1G79570	c1
AT3G13870	c1
AT2G12461	c1
AT4G26055	c1
AT5G46845	c1
AT5G57181	c1
AT5G05870	c1
AT3G49880	c1
AT4G35560	c1
AT1G19970	c1
AT4G23630	c1
AT4G34000	c1
AT3G56270	c1
AT5G03190	c1
AT5G66460	c1
AT1G56170	c1
AT5G47640	c1
AT3G01990	c1
AT1G58170	c1
AT1G09960	c1
AT1G78610	c1
AT1G22710	c1
AT2G04350	c1
AT1G71960	c1
AT5G06530	c1
AT2G18230	c1
AT1G04990	c1
AT4G09030	c1
AT3G58800	c1
AT3G10340	c1
AT5G22500	c1
AT2G41540	c1
AT1G67730	c1
AT5G10480	c1
AT3G13620	c1
AT1G75450	c1
AT1G33260	c1
AT5G53760	c1
AT2G38010	c1
AT3G53960	c1
AT1G76390	c1
AT5G61780	c1
AT1G69870	c1
AT5G23850	c1
AT1G14640	c1
AT3G12200	c1
AT1G29240	c1
AT2G01680	c1
AT1G73680	c1
AT3G62200	c1
AT3G16170	c1
AT2G26920	c1
AT5G64430	c1
AT1G80300	c1
AT3G62700	c1
AT4G16250	c1
AT5G09620	c1
AT5G50350	c1
AT3G58600	c1
AT3G03740	c1
AT3G03560	c1
AT5G08660	c1
AT1G25580	c1
AT5G39450	c1
AT1G06540	c1
AT4G01650	c1
AT1G61600	c1
AT5G62940	c1
AT1G15970	c1
AT5G64080	c1
AT3G54390	c1
AT4G16442	c1
AT1G46480	c1
AT4G17970	c1
AT5G62210	c1
AT3G01960	c1
AT5G61430	c1
AT5G45070	c1
AT3G06035	c1
AT3G29630	c1
AT2G31990	c1
AT3G01513	c1
AT3G08040	c1
AT3G22930	c1
AT5G10820	c1
AT1G06870	c1
AT3G25585	c1
AT3G20040	c1
AT3G55120	c1
AT5G08640	c1
AT5G13930	c1
AT4G00300	c1
AT1G74380	c1
AT2G41110	c1
AT5G45340	c1
AT5G59450	c1
AT4G22580	c1
AT1G76360	c1
AT2G39360	c1
AT3G02880	c1
AT5G57480	c1
AT2G36300	c1
AT5G44370	c1
AT3G44850	c1
AT5G67540	c1
AT1G23170	c1
AT3G54030	c1
AT1G63500	c1
AT1G30640	c1
AT5G21990	c1
AT3G18620	c1
AT4G36945	c1
AT2G46700	c1
AT5G04885	c1
AT4G17350	c1
AT3G01510	c1
AT2G43240	c1
AT5G41460	c1
AT1G29195	c1
AT1G23040	c1
AT3G48020	c1
AT1G29300	c1
AT2G17700	c1
AT3G10960	c1
AT1G06780	c1
AT2G22470	c1
AT5G01820	c1
AT3G53150	c1
AT4G10500	c1
AT1G18970	c1
AT2G15220	c1
AT3G18440	c1
AT4G35630	c1
AT4G27070	c1
AT4G39950	c1
AT1G70300	c1
AT3G48850	c1
AT4G11650	c1
AT4G23700	c1
AT1G68620	c1
AT2G30550	c1
AT4G39190	c1
AT3G12750	c1
AT3G28510	c1
AT5G49850	c1
AT1G67810	c1
AT1G68880	c1
AT1G35190	c1
AT3G21420	c1
AT1G25370	c1
AT2G21560	c1
AT1G64370	c1
AT4G01390	c1
AT4G19970	c1
AT2G05510	c1
AT4G17030	c1
AT5G50800	c1
AT5G24600	c1
AT1G22150	c1
AT3G15990	c1
AT1G55120	c1
AT3G51860	c1
AT5G11930	c1
AT3G27150	c1
AT5G05160	c1
AT3G25290	c1
AT5G44670	c1
AT5G18070	c1
AT5G45275	c1
AT3G05030	c1
AT5G49990	c1
AT4G21960	c1
AT5G09220	c1
AT2G33770	c1
AT4G24450	c1
AT1G79450	c1
AT2G30840	c1
AT5G49950	c1
AT4G18360	c1
AT3G47790	c1
AT2G18360	c1
AT5G63560	c1
AT3G22240	c1
AT3G61990	c1
AT3G17820	c1
AT1G17745	c1
AT5G10770	c1
AT1G18980	c1
AT2G41380	c1
AT1G51420	c1
AT5G24090	c1
AT5G59530	c1
AT1G29050	c1
AT2G45290	c1
AT5G01640	c1
AT1G77120	c1
AT3G22910	c1
AT4G33070	c1
AT5G40010	c1
AT4G30490	c1
AT5G55070	c1
AT2G34250	c1
AT1G04120	c1
AT3G55410	c1
AT3G53780	c1
AT4G24400	c1
AT1G63720	c1
AT3G10500	c1
AT5G51640	c1
AT1G78850	c1
AT3G11340	c1
AT3G49690	c1
AT2G37280	c1
AT5G44400	c1
AT2G15320	c1
AT1G54160	c1
AT1G68470	c1
AT5G49630	c1
AT1G70800	c1
AT3G53450	c1
AT2G15310	c1
AT4G01380	c1
AT5G53820	c1
AT2G48090	c1
AT1G07640	c1
AT2G16740	c1
AT5G45350	c1
AT5G47920	c1
AT1G71110	c1
AT5G43380	c1
AT3G17690	c1
AT4G18890	c1
AT5G06750	c1
AT3G47540	c1
AT5G64810	c1
AT1G10040	c1
AT1G07500	c1
AT1G45249	c1
AT1G56600	c1
AT4G05020	c1
AT1G67360	c1
AT5G19875	c1
AT4G38620	c1
AT4G04610	c1
AT5G24660	c1
AT5G57190	c1
AT4G15150	c1
AT2G43120	c1
AT3G13100	c1
AT4G12130	c1
AT2G25690	c1
AT1G06210	c1
AT2G17290	c1
AT1G30080	c1
AT4G00940	c1
AT2G41130	c1
AT2G30933	c1
AT2G03500	c1
AT3G25710	c1
AT3G12090	c1
AT4G10050	c1
AT4G01440	c1
AT4G01450	c1
AT5G54660	c1
AT1G72800	c1
AT4G13345	c1
AT5G14500	c1
AT5G17650	c1
AT1G44960	c1
AT2G34140	c1
AT5G61760	c1
AT1G25530	c1
AT2G21060	c1
AT5G40980	c1
AT1G28680	c1
AT2G44670	c1
AT1G06080	c1
AT2G38090	c1
AT4G29110	c1
AT1G77200	c1
AT1G04330	c1
AT3G20590	c1
AT5G62330	c1
AT1G32340	c1
AT4G04320	c1
AT4G23100	c1
AT1G04970	c1
AT3G56310	c1
AT5G10650	c1
AT4G29490	c1
AT4G36400	c1
AT3G05165	c1
AT3G52880	c1
AT4G14030	c1
AT5G43280	c1
AT4G13270	c1
AT4G19670	c1
AT1G27000	c1
AT4G36195	c1
AT4G09760	c1
AT1G22360	c1
AT5G47860	c1
AT5G51070	c1
AT3G23790	c1
AT4G23680	c1
AT5G22860	c1
AT2G25940	c1
AT3G22200	c1
AT5G11520	c1
AT2G02390	c1
AT5G17380	c1
AT5G27600	c1
AT5G35690	c1
AT1G63440	c1
AT3G53230	c1
AT3G17710	c1
AT3G09480	c1
AT1G78670	c1
AT4G16190	c1
AT2G43060	c1
AT5G61640	c1
AT4G07990	c1
AT5G46560	c1
AT5G60370	c1
AT1G08030	c1
AT1G27840	c1
AT2G20410	c1
AT4G29820	c1
AT3G10190	c1
AT3G52570	c1
AT4G31600	c1
AT1G26650	c1
AT4G12110	c1
AT3G20620	c1
AT5G20580	c1
AT1G05360	c1
AT4G24060	c1
AT5G57270	c1
AT1G19710	c1
AT1G24764	c1
AT1G74510	c1
AT4G34270	c1
AT5G48640	c1
AT1G55520	c1
AT5G60620	c1
AT1G33270	c1
AT5G06950	c1
AT3G07690	c1
AT2G33310	c1
AT4G35220	c1
AT3G25560	c1
AT3G26380	c1
AT1G54340	c1
AT2G01350	c1
AT5G23490	c1
[truncated: 15,107 more rows]

## Sheet: b) Cluster 1
Description	GO ID	Total	Found	p-value	q-value
RESPONSE_TO_STIMULUS	GO:0050896 response to stimulus, GOslim:biological_process	6222	2149	3.17e-107	7.94e-103
RESPONSE_TO_CHEMICAL_STIMULUS	GO:0042221 response to chemical stimulus, GOslim:biological_process	3953	1475	1.63e-85	2.04e-81
RESPONSE_TO_STRESS	GO:0006950 response to stress, GOslim:biological_process	4037	1480	2e-81	1.67e-77
CELLULAR_PROCESS	GO:0009987 cellular process, GOslim:biological_process	14300	3696	4.31e-56	2.7e-52
RESPONSE_TO_ORGANIC_SUBSTANCE	GO:0010033 response to organic substance, GOslim:biological_process	2739	1019	1.24e-55	6.18e-52
TRANSPORT	GO:0006810 transport, GOslim:biological_process	3558	1225	2.93e-53	1.22e-49
LOCALIZATION	GO:0051179 localization, GOslim:biological_process	3799	1281	4.93e-52	1.76e-48
ESTABLISHMENT_OF_LOCALIZATION	GO:0051234 establishment of localization, GOslim:biological_process	3633	1226	1.23e-49	3.85e-46
CELLULAR_RESPONSE_TO_STIMULUS	GO:0051716 cellular response to stimulus, GOslim:biological_process	2302	851	6.29e-45	1.75e-41
SIGNALING	GO:0023052 signaling, GOslim:biological_process	2317	838	2.47e-41	6.17e-38
RESPONSE_TO_BIOTIC_STIMULUS	GO:0009607 response to biotic stimulus, GOslim:biological_process	1675	656	2.73e-40	6.2e-37
IMMUNE_RESPONSE	GO:0006955 immune response, GOslim:biological_process	980	446	7.19e-39	1.38e-35
IMMUNE_SYSTEM_PROCESS	GO:0002376 immune system process, GOslim:biological_process	980	446	7.19e-39	1.38e-35
INNATE_IMMUNE_RESPONSE	GO:0045087 innate immune response, GOslim:biological_process	926	429	8.6e-39	1.54e-35
RESPONSE_TO_EXTERNAL_STIMULUS	GO:0009605 response to external stimulus, GOslim:biological_process	1047	466	9.81e-39	1.64e-35
CELLULAR_RESPONSE_TO_STRESS	GO:0033554 cellular response to stress, GOslim:biological_process	1431	577	4.03e-38	6.31e-35
DEFENSE_RESPONSE	GO:0006952 defense response, GOslim:biological_process	1644	636	9.45e-38	1.39e-34
METABOLIC_PROCESS	GO:0008152 metabolic process, GOslim:biological_process	13568	3389	3.78e-34	5.25e-31
BIOLOGICAL_REGULATION	GO:0065007 biological regulation, GOslim:biological_process	6172	1746	1.97e-33	2.59e-30
RESPONSE_TO_ABIOTIC_STIMULUS	GO:0009628 response to abiotic stimulus, GOslim:biological_process	2615	875	3.01e-33	3.76e-30
RESPONSE_TO_CARBOHYDRATE_STIMULUS	GO:0009743 response to carbohydrate stimulus, GOslim:biological_process	811	367	1.14e-31	1.36e-28
RESPONSE_TO_INORGANIC_SUBSTANCE	GO:0010035 response to inorganic substance, GOslim:biological_process	1075	443	7.17e-31	8.15e-28
SMALL_MOLECULE_METABOLIC_PROCESS	GO:0044281 small molecule metabolic process, GOslim:biological_process	4053	1216	5.57e-30	6.06e-27
INTRACELLULAR_TRANSPORT	GO:0046907 intracellular transport, GOslim:biological_process	1422	535	2.6e-29	2.71e-26
RESPONSE_TO_OTHER_ORGANISM	GO:0051707 response to other organism, GOslim:biological_process	1411	531	4.1e-29	4.1e-26
RESPONSE_TO_CHITIN	GO:0010200 response to chitin, GOslim:biological_process	421	231	9.62e-29	9.26e-26
PRIMARY_METABOLIC_PROCESS	GO:0044238 primary metabolic process, GOslim:biological_process	11672	2928	1.48e-27	1.37e-24
REGULATION_OF_DEFENSE_RESPONSE	GO:0031347 regulation of defense response, GOslim:biological_process	529	263	1.57e-27	1.4e-24
RESPONSE_TO_OSMOTIC_STRESS	GO:0006970 response to osmotic stress, GOslim:biological_process	834	357	2.59e-27	2.24e-24
REGULATION_OF_RESPONSE_TO_STRESS	GO:0080134 regulation of response to stress, GOslim:biological_process	544	267	2.78e-27	2.32e-24
REGULATION_OF_RESPONSE_TO_STIMULUS	GO:0048583 regulation of response to stimulus, GOslim:biological_process	662	304	3.53e-27	2.85e-24
RESPONSE_TO_SALT_STRESS	GO:0009651 response to salt stress, GOslim:biological_process	780	339	7.11e-27	5.56e-24
SMALL_MOLECULE_BIOSYNTHETIC_PROCESS	GO:0044283 small molecule biosynthetic process, GOslim:biological_process	1859	639	1.98e-26	1.5e-23
CELLULAR_METABOLIC_PROCESS	GO:0044237 cellular metabolic process, GOslim:biological_process	11467	2873	2.22e-26	1.63e-23
CELLULAR_LOCALIZATION	GO:0051641 cellular localization, GOslim:biological_process	1611	572	2.57e-26	1.84e-23
REGULATION_OF_BIOLOGICAL_PROCESS	GO:0050789 regulation of biological process, GOslim:biological_process	5191	1461	3.58e-26	2.42e-23
REGULATION_OF_CELLULAR_PROCESS	GO:0050794 regulation of cellular process, GOslim:biological_process	4571	1314	3.52e-26	2.42e-23
RESPONSE_TO_ENDOPLASMIC_RETICULUM_STRESS	GO:0034976 response to endoplasmic reticulum stress, GOslim:biological_process	351	198	6.6e-26	4.34e-23
ESTABLISHMENT_OF_LOCALIZATION_IN_CELL	GO:0051649 establishment of localization in cell, GOslim:biological_process	1553	550	4.21e-25	2.7e-22
ROOT_DEVELOPMENT	GO:0048364 root development, GOslim:biological_process	581	269	1.43e-24	8.97e-22
CELLULAR_MODIFIED_AMINO_ACID_METABOLIC_PROCESS	GO:0006575 cellular modified amino acid metabolic process, GOslim:biological_process	708	308	1.49e-24	9.1e-22
ROOT_SYSTEM_DEVELOPMENT	GO:0022622 root system development, GOslim:biological_process	582	269	1.74e-24	1.02e-21
MACROMOLECULE_LOCALIZATION	GO:0033036 macromolecule localization, GOslim:biological_process	1528	540	1.75e-24	1.02e-21
RESPONSE_TO_ENDOGENOUS_STIMULUS	GO:0009719 response to endogenous stimulus, GOslim:biological_process	1604	560	2.13e-24	1.21e-21
CELL_COMMUNICATION	GO:0007154 cell communication, GOslim:biological_process	705	306	2.81e-24	1.56e-21
CELLULAR_RESPONSE_TO_NUTRIENT_LEVELS	GO:0031669 cellular response to nutrient levels, GOslim:biological_process	314	180	2.97e-24	1.62e-21
RESPONSE_TO_PROTEIN_STIMULUS	GO:0051789 response to protein stimulus, GOslim:biological_process	374	200	4.88e-24	2.6e-21
PROTEIN_TRANSPORT	GO:0015031 protein transport, GOslim:biological_process	1159	435	9.83e-24	5.02e-21
ESTABLISHMENT_OF_PROTEIN_LOCALIZATION	GO:0045184 establishment of protein localization, GOslim:biological_process	1159	435	9.83e-24	5.02e-21
CELLULAR_MACROMOLECULE_LOCALIZATION	GO:0070727 cellular macromolecule localization, GOslim:biological_process	1091	415	1.54e-23	7.73e-21
CELLULAR_RESPONSE_TO_CHEMICAL_STIMULUS	GO:0070887 cellular response to chemical stimulus, GOslim:biological_process	1403	500	2.64e-23	1.27e-20
RESPONSE_TO_NUTRIENT_LEVELS	GO:0031667 response to nutrient levels, GOslim:biological_process	331	183	2.61e-23	1.27e-20
CELLULAR_RESPONSE_TO_STARVATION	GO:0009267 cellular response to starvation, GOslim:biological_process	300	172	3.06e-23	1.44e-20
CELLULAR_PROTEIN_LOCALIZATION	GO:0034613 cellular protein localization, GOslim:biological_process	1057	403	5.04e-23	2.33e-20
PROTEIN_LOCALIZATION	GO:0008104 protein localization, GOslim:biological_process	1214	446	7.34e-23	3.34e-20
RESPONSE_TO_HORMONE_STIMULUS	GO:0009725 response to hormone stimulus, GOslim:biological_process	1364	487	7.66e-23	3.42e-20
INTRACELLULAR_PROTEIN_TRANSPORT	GO:0006886 intracellular protein transport, GOslim:biological_process	1043	398	8.43e-23	3.7e-20
ROOT_MORPHOGENESIS	GO:0010015 root morphogenesis, GOslim:biological_process	429	214	9.27e-23	4e-20
RESPONSE_TO_STARVATION	GO:0042594 response to starvation, GOslim:biological_process	308	173	1.18e-22	4.98e-20
CELLULAR_RESPONSE_TO_EXTRACELLULAR_STIMULUS	GO:0031668 cellular response to extracellular stimulus, GOslim:biological_process	352	188	1.25e-22	5.22e-20
CELLULAR_RESPONSE_TO_EXTERNAL_STIMULUS	GO:0071496 cellular response to external stimulus, GOslim:biological_process	353	188	1.59e-22	6.53e-20
MULTI-ORGANISM_PROCESS	GO:0051704 multi-organism process, GOslim:biological_process	1804	602	1.98e-22	8e-20
CELLULAR_RESPONSE_TO_ORGANIC_SUBSTANCE	GO:0071310 cellular response to organic substance, GOslim:biological_process	1221	445	2.82e-22	1.1e-19
SIGNAL_TRANSDUCTION	GO:0007165 signal transduction, GOslim:biological_process	1659	563	2.79e-22	1.1e-19
ROOT_EPIDERMAL_CELL_DIFFERENTIATION	GO:0010053 root epidermal cell differentiation, GOslim:biological_process	349	185	5.12e-22	1.97e-19
REGULATION_OF_IMMUNE_RESPONSE	GO:0050776 regulation of immune response, GOslim:biological_process	419	208	5.75e-22	2.15e-19
REGULATION_OF_IMMUNE_SYSTEM_PROCESS	GO:0002682 regulation of immune system process, GOslim:biological_process	419	208	5.75e-22	2.15e-19
ANION_TRANSPORT	GO:0006820 anion transport, GOslim:biological_process	350	185	6.49e-22	2.39e-19
RESPONSE_TO_EXTRACELLULAR_STIMULUS	GO:0009991 response to extracellular stimulus, GOslim:biological_process	370	191	1.05e-21	3.8e-19
CELL_DEATH	GO:0008219 cell death, GOslim:biological_process	498	232	1.29e-21	4.55e-19
DEATH	GO:0016265 death, GOslim:biological_process	498	232	1.29e-21	4.55e-19
REGULATION_OF_CELL_DEATH	GO:0010941 regulation of cell death, GOslim:biological_process	405	202	1.5e-21	5.2e-19
DEFENSE_RESPONSE,_INCOMPATIBLE_INTERACTION	GO:0009814 defense response, incompatible interaction, GOslim:biological_process	535	243	1.82e-21	6.23e-19
REGULATION_OF_PROGRAMMED_CELL_DEATH	GO:0043067 regulation of programmed cell death, GOslim:biological_process	397	199	1.94e-21	6.55e-19
SYSTEMIC_ACQUIRED_RESISTANCE	GO:0009627 systemic acquired resistance, GOslim:biological_process	444	214	2.23e-21	7.44e-19
RESPONSE_TO_ABSCISIC_ACID_STIMULUS	GO:0009737 response to abscisic acid stimulus, GOslim:biological_process	618	268	2.33e-21	7.69e-19
REGULATION_OF_PLANT-TYPE_HYPERSENSITIVE_RESPONSE	GO:0010363 regulation of plant-type hypersensitive response, GOslim:biological_process	371	190	2.62e-21	8.51e-19
REGULATION_OF_INNATE_IMMUNE_RESPONSE	GO:0045088 regulation of innate immune response, GOslim:biological_process	415	204	3.43e-21	1.1e-18
CELLULAR_MODIFIED_AMINO_ACID_BIOSYNTHETIC_PROCESS	GO:0042398 cellular modified amino acid biosynthetic process, GOslim:biological_process	532	241	3.47e-21	1.1e-18
REGULATION_OF_CELLULAR_RESPONSE_TO_STRESS	GO:0080135 regulation of cellular response to stress, GOslim:biological_process	379	192	4.05e-21	1.25e-18
PROGRAMMED_CELL_DEATH	GO:0012501 programmed cell death, GOslim:biological_process	450	215	4.02e-21	1.25e-18
CARBOHYDRATE_METABOLIC_PROCESS	GO:0005975 carbohydrate metabolic process, GOslim:biological_process	2239	706	4.13e-21	1.26e-18
TRICHOBLAST_DIFFERENTIATION	GO:0010054 trichoblast differentiation, GOslim:biological_process	338	178	5.22e-21	1.57e-18
CELLULAR_PROTEIN_MODIFICATION_PROCESS	GO:0006464 cellular protein modification process, GOslim:biological_process	2764	837	5.26e-21	1.57e-18
SIGNAL_TRANSMISSION	GO:0023060 signal transmission, GOslim:biological_process	1743	576	1.02e-20	3e-18
EPIDERMIS_DEVELOPMENT	GO:0008544 epidermis development, GOslim:biological_process	465	217	2.28e-20	6.56e-18
ECTODERM_DEVELOPMENT	GO:0007398 ectoderm development, GOslim:biological_process	465	217	2.28e-20	6.56e-18
EPIDERMAL_CELL_DIFFERENTIATION	GO:0009913 epidermal cell differentiation, GOslim:biological_process	463	216	2.87e-20	8.16e-18
PLANT-TYPE_HYPERSENSITIVE_RESPONSE	GO:0009626 plant-type hypersensitive response, GOslim:biological_process	401	196	3.33e-20	9.37e-18
PROTEIN_TARGETING_TO_MEMBRANE	GO:0006612 protein targeting to membrane, GOslim:biological_process	392	193	3.53e-20	9.81e-18
HOST_PROGRAMMED_CELL_DEATH_INDUCED_BY_SYMBIONT	GO:0034050 host programmed cell death induced by symbiont, GOslim:biological_process	402	196	4.11e-20	1.13e-17
ION_TRANSPORT	GO:0006811 ion transport, GOslim:biological_process	1016	375	1.3e-19	3.54e-17
CELLULAR_AROMATIC_COMPOUND_METABOLIC_PROCESS	GO:0006725 cellular aromatic compound metabolic process, GOslim:biological_process	1017	373	3.71e-19	9.99e-17
ER-NUCLEUS_SIGNALING_PATHWAY	GO:0006984 ER-nucleus signaling pathway, GOslim:biological_process	192	120	9.18e-19	2.44e-16
CELLULAR_CARBOHYDRATE_METABOLIC_PROCESS	GO:0044262 cellular carbohydrate metabolic process, GOslim:biological_process	1771	571	1.04e-18	2.74e-16
PROTEIN_TARGETING	GO:0006605 protein targeting, GOslim:biological_process	906	339	1.58e-18	4.12e-16
CELLULAR_RESPONSE_TO_BIOTIC_STIMULUS	GO:0071216 cellular response to biotic stimulus, GOslim:biological_process	195	120	2.22e-18	5.73e-16
CELLULAR_RESPONSE_TO_PROTEIN_STIMULUS	GO:0071445 cellular response to protein stimulus, GOslim:biological_process	192	118	4.57e-18	1.17e-15
VESICLE-MEDIATED_TRANSPORT	GO:0016192 vesicle-mediated transport, GOslim:biological_process	597	247	8.49e-18	2.14e-15
ENDOPLASMIC_RETICULUM_UNFOLDED_PROTEIN_RESPONSE	GO:0030968 endoplasmic reticulum unfolded protein response, GOslim:biological_process	184	114	1.08e-17	2.69e-15
RESPONSE_TO_UNFOLDED_PROTEIN	GO:0006986 response to unfolded protein, GOslim:biological_process	186	114	1.93e-17	4.74e-15
CELLULAR_RESPONSE_TO_UNFOLDED_PROTEIN	GO:0034620 cellular response to unfolded protein, GOslim:biological_process	186	114	1.93e-17	4.74e-15
INORGANIC_ANION_TRANSPORT	GO:0015698 inorganic anion transport, GOslim:biological_process	266	141	4.07e-17	9.88e-15
RESPONSE_TO_ETHYLENE_STIMULUS	GO:0009723 response to ethylene stimulus, GOslim:biological_process	353	169	5.84e-17	1.4e-14
AROMATIC_COMPOUND_BIOSYNTHETIC_PROCESS	GO:0019438 aromatic compound biosynthetic process, GOslim:biological_process	679	267	6.49e-17	1.55e-14
RESPONSE_TO_SALICYLIC_ACID_STIMULUS	GO:0009751 response to salicylic acid stimulus, GOslim:biological_process	470	205	7.61e-17	1.8e-14
RESPONSE_TO_METAL_ION	GO:0010038 response to metal ion, GOslim:biological_process	603	242	3.02e-16	7.06e-14
CELLULAR_RESPONSE_TO_ENDOGENOUS_STIMULUS	GO:0071495 cellular response to endogenous stimulus, GOslim:biological_process	804	299	3.38e-16	7.84e-14
ABSCISIC_ACID_MEDIATED_SIGNALING_PATHWAY	GO:0009738 abscisic acid mediated signaling pathway, GOslim:biological_process	252	133	4.07e-16	9.34e-14
DEVELOPMENTAL_MATURATION	GO:0021700 developmental maturation, GOslim:biological_process	319	155	4.23e-16	9.63e-14
TRICHOBLAST_MATURATION	GO:0048764 trichoblast maturation, GOslim:biological_process	307	151	4.57e-16	1.02e-13
ROOT_HAIR_CELL_DIFFERENTIATION	GO:0048765 root hair cell differentiation, GOslim:biological_process	307	151	4.57e-16	1.02e-13
CELL_MATURATION	GO:0048469 cell maturation, GOslim:biological_process	308	151	5.65e-16	1.25e-13
PHENYLPROPANOID_METABOLIC_PROCESS	GO:0009698 phenylpropanoid metabolic process, GOslim:biological_process	400	180	5.99e-16	1.32e-13
TRANSITION_METAL_ION_TRANSPORT	GO:0000041 transition metal ion transport, GOslim:biological_process	243	129	8.01e-16	1.74e-13
BIOSYNTHETIC_PROCESS	GO:0009058 biosynthetic process, GOslim:biological_process	7941	1991	8.68e-16	1.87e-13
OXOACID_METABOLIC_PROCESS	GO:0043436 oxoacid metabolic process, GOslim:biological_process	2099	633	1.36e-15	2.88e-13
CARBOXYLIC_ACID_METABOLIC_PROCESS	GO:0019752 carboxylic acid metabolic process, GOslim:biological_process	2099	633	1.36e-15	2.88e-13
ORGANIC_ACID_METABOLIC_PROCESS	GO:0006082 organic acid metabolic process, GOslim:biological_process	2101	633	1.59e-15	3.35e-13
CELLULAR_RESPONSE_TO_ABSCISIC_ACID_STIMULUS	GO:0071215 cellular response to abscisic acid stimulus, GOslim:biological_process	267	136	1.62e-15	3.38e-13
NEGATIVE_REGULATION_OF_PROGRAMMED_CELL_DEATH	GO:0043069 negative regulation of programmed cell death, GOslim:biological_process	170	102	2.57e-15	5.3e-13
NEGATIVE_REGULATION_OF_CELL_DEATH	GO:0060548 negative regulation of cell death, GOslim:biological_process	174	103	3.61e-15	7.39e-13
TISSUE_DEVELOPMENT	GO:0009888 tissue development, GOslim:biological_process	999	347	3.68e-15	7.49e-13
CELLULAR_KETONE_METABOLIC_PROCESS	GO:0042180 cellular ketone metabolic process, GOslim:biological_process	2121	635	4.03e-15	8.13e-13
CATABOLIC_PROCESS	GO:0009056 catabolic process, GOslim:biological_process	2175	648	4.54e-15	9.08e-13
NITRATE_TRANSPORT	GO:0015706 nitrate transport, GOslim:biological_process	207	114	5.6e-15	1.11e-12
HORMONE-MEDIATED_SIGNALING_PATHWAY	GO:0009755 hormone-mediated signaling pathway, GOslim:biological_process	589	232	6.27e-15	1.24e-12
RESPONSE_TO_FUNGUS	GO:0009620 response to fungus, GOslim:biological_process	497	205	6.81e-15	1.33e-12
RESPONSE_TO_WOUNDING	GO:0009611 response to wounding, GOslim:biological_process	340	156	1.48e-14	2.88e-12
RESPONSE_TO_NITRATE	GO:0010167 response to nitrate, GOslim:biological_process	197	109	1.73e-14	3.34e-12
RESPONSE_TO_CADMIUM_ION	GO:0046686 response to cadmium ion, GOslim:biological_process	470	195	2e-14	3.82e-12
CELLULAR_RESPONSE_TO_HORMONE_STIMULUS	GO:0032870 cellular response to hormone stimulus, GOslim:biological_process	630	241	2.41e-14	4.56e-12
CELLULAR_CATABOLIC_PROCESS	GO:0044248 cellular catabolic process, GOslim:biological_process	2088	620	3.26e-14	6.13e-12
METAL_ION_TRANSPORT	GO:0030001 metal ion transport, GOslim:biological_process	573	224	3.43e-14	6.4e-12
PHENYLPROPANOID_BIOSYNTHETIC_PROCESS	GO:0009699 phenylpropanoid biosynthetic process, GOslim:biological_process	326	150	3.97e-14	7.36e-12
DEFENSE_RESPONSE_TO_FUNGUS	GO:0050832 defense response to fungus, GOslim:biological_process	342	154	7.19e-14	1.32e-11
MEMBRANE_LIPID_METABOLIC_PROCESS	GO:0006643 membrane lipid metabolic process, GOslim:biological_process	178	100	1.02e-13	1.86e-11
CELLULAR_RESPONSE_TO_SALICYLIC_ACID_STIMULUS	GO:0071446 cellular response to salicylic acid stimulus, GOslim:biological_process	351	156	1.14e-13	2.06e-11
NEGATIVE_REGULATION_OF_CELLULAR_PROCESS	GO:0048523 negative regulation of cellular process, GOslim:biological_process	779	279	1.22e-13	2.19e-11
NEGATIVE_REGULATION_OF_BIOLOGICAL_PROCESS	GO:0048519 negative regulation of biological process, GOslim:biological_process	1215	395	1.3e-13	2.32e-11
SALICYLIC_ACID_MEDIATED_SIGNALING_PATHWAY	GO:0009863 salicylic acid mediated signaling pathway, GOslim:biological_process	349	155	1.43e-13	2.53e-11
RESPONSE_TO_OXIDATIVE_STRESS	GO:0006979 response to oxidative stress, GOslim:biological_process	586	224	2.11e-13	3.72e-11
CELLULAR_RESPONSE_TO_PHOSPHATE_STARVATION	GO:0016036 cellular response to phosphate starvation, GOslim:biological_process	139	85	2.4e-13	4.2e-11
GOLGI_VESICLE_TRANSPORT	GO:0048193 Golgi vesicle transport, GOslim:biological_process	327	147	2.91e-13	5.06e-11
AMINE_TRANSPORT	GO:0015837 amine transport, GOslim:biological_process	272	129	4.57e-13	7.88e-11
NEGATIVE_REGULATION_OF_RESPONSE_TO_STIMULUS	GO:0048585 negative regulation of response to stimulus, GOslim:biological_process	346	152	4.78e-13	8.19e-11
NEGATIVE_REGULATION_OF_DEFENSE_RESPONSE	GO:0031348 negative regulation of defense response, GOslim:biological_process	273	129	5.58e-13	9.5e-11
GLYCOLIPID_METABOLIC_PROCESS	GO:0006664 glycolipid metabolic process, GOslim:biological_process	115	75	5.93e-13	1e-10
MACROMOLECULE_MODIFICATION	GO:0043412 macromolecule modification, GOslim:biological_process	3188	875	5.97e-13	1e-10
GALACTOLIPID_METABOLIC_PROCESS	GO:0019374 galactolipid metabolic process, GOslim:biological_process	100	69	7.42e-13	1.24e-10
CELL_WALL_MACROMOLECULE_METABOLIC_PROCESS	GO:0044036 cell wall macromolecule metabolic process, GOslim:biological_process	317	142	9.01e-13	1.49e-10
AMINO_ACID_TRANSPORT	GO:0006865 amino acid transport, GOslim:biological_process	266	126	9.07e-13	1.49e-10
ORGANIC_ACID_TRANSPORT	GO:0015849 organic acid transport, GOslim:biological_process	289	133	1.07e-12	1.75e-10
REGULATION_OF_BIOLOGICAL_QUALITY	GO:0065008 regulation of biological quality, GOslim:biological_process	1637	496	1.22e-12	1.98e-10
GALACTOLIPID_BIOSYNTHETIC_PROCESS	GO:0019375 galactolipid biosynthetic process, GOslim:biological_process	99	68	1.26e-12	2.04e-10
CELLULAR_BIOSYNTHETIC_PROCESS	GO:0044249 cellular biosynthetic process, GOslim:biological_process	7714	1902	1.42e-12	2.28e-10
RESPONSE_TO_WATER_DEPRIVATION	GO:0009414 response to water deprivation, GOslim:biological_process	413	170	1.56e-12	2.48e-10
RESPIRATORY_BURST	GO:0045730 respiratory burst, GOslim:biological_process	121	76	1.64e-12	2.58e-10
RESPIRATORY_BURST_INVOLVED_IN_DEFENSE_RESPONSE	GO:0002679 respiratory burst involved in defense response, GOslim:biological_process	121	76	1.64e-12	2.58e-10
CATION_TRANSPORT	GO:0006812 cation transport, GOslim:biological_process	810	281	1.85e-12	2.89e-10
SECONDARY_METABOLIC_PROCESS	GO:0019748 secondary metabolic process, GOslim:biological_process	1241	394	2.04e-12	3.17e-10
MEMBRANE_LIPID_BIOSYNTHETIC_PROCESS	GO:0046467 membrane lipid biosynthetic process, GOslim:biological_process	148	85	2.92e-12	4.51e-10
PEPTIDYL-AMINO_ACID_MODIFICATION	GO:0018193 peptidyl-amino acid modification, GOslim:biological_process	610	225	3.12e-12	4.78e-10
RESPONSE_TO_WATER_STIMULUS	GO:0009415 response to water stimulus, GOslim:biological_process	421	171	3.19e-12	4.87e-10
CARBOXYLIC_ACID_TRANSPORT	GO:0046942 carboxylic acid transport, GOslim:biological_process	283	129	3.87e-12	5.87e-10
CARBOHYDRATE_BIOSYNTHETIC_PROCESS	GO:0016051 carbohydrate biosynthetic process, GOslim:biological_process	1069	347	4.96e-12	7.48e-10
RESPONSE_TO_TEMPERATURE_STIMULUS	GO:0009266 response to temperature stimulus, GOslim:biological_process	955	316	7.64e-12	1.15e-09
CELLULAR_RESPONSE_TO_IRON_ION_STARVATION	GO:0010106 cellular response to iron ion starvation, GOslim:biological_process	116	72	9.37e-12	1.39e-09
FLAVONOID_BIOSYNTHETIC_PROCESS	GO:0009813 flavonoid biosynthetic process, GOslim:biological_process	225	109	1.06e-11	1.58e-09
GLYCOLIPID_BIOSYNTHETIC_PROCESS	GO:0009247 glycolipid biosynthetic process, GOslim:biological_process	106	68	1.19e-11	1.75e-09
CELL_WALL_POLYSACCHARIDE_METABOLIC_PROCESS	GO:0010383 cell wall polysaccharide metabolic process, GOslim:biological_process	229	110	1.28e-11	1.87e-09
FLAVONOID_METABOLIC_PROCESS	GO:0009812 flavonoid metabolic process, GOslim:biological_process	250	116	1.95e-11	2.84e-09
PROTEIN_ACYLATION	GO:0043543 protein acylation, GOslim:biological_process	560	207	1.97e-11	2.85e-09
MACROMOLECULE_GLYCOSYLATION	GO:0043413 macromolecule glycosylation, GOslim:biological_process	225	108	2.02e-11	2.86e-09
GLYCOPROTEIN_BIOSYNTHETIC_PROCESS	GO:0009101 glycoprotein biosynthetic process, GOslim:biological_process	225	108	2.02e-11	2.86e-09
GLYCOSYLATION	GO:0070085 glycosylation, GOslim:biological_process	225	108	2.02e-11	2.86e-09
PROTEIN_GLYCOSYLATION	GO:0006486 protein glycosylation, GOslim:biological_process	225	108	2.02e-11	2.86e-09
DEFENSE_RESPONSE_BY_CALLOSE_DEPOSITION	GO:0052542 defense response by callose deposition, GOslim:biological_process	62	50	2.13e-11	3e-09
N-TERMINAL_PROTEIN_MYRISTOYLATION	GO:0006499 N-terminal protein myristoylation, GOslim:biological_process	529	198	2.28e-11	3.15e-09
PROTEIN_MYRISTOYLATION	GO:0018377 protein myristoylation, GOslim:biological_process	529	198	2.28e-11	3.15e-09
N-TERMINAL_PROTEIN_LIPIDATION	GO:0006498 N-terminal protein lipidation, GOslim:biological_process	529	198	2.28e-11	3.15e-09
POSITIVE_REGULATION_OF_FLAVONOID_BIOSYNTHETIC_PROCESS	GO:0009963 positive regulation of flavonoid biosynthetic process, GOslim:biological_process	103	66	2.46e-11	3.38e-09
TOXIN_CATABOLIC_PROCESS	GO:0009407 toxin catabolic process, GOslim:biological_process	211	103	2.77e-11	3.77e-09
TOXIN_METABOLIC_PROCESS	GO:0009404 toxin metabolic process, GOslim:biological_process	211	103	2.77e-11	3.77e-09
N-TERMINAL_PROTEIN_AMINO_ACID_MODIFICATION	GO:0031365 N-terminal protein amino acid modification, GOslim:biological_process	533	198	3.83e-11	5.18e-09
INTRACELLULAR_SIGNAL_TRANSDUCTION	GO:0035556 intracellular signal transduction, GOslim:biological_process	222	106	3.91e-11	5.26e-09
REGULATION_OF_FLAVONOID_BIOSYNTHETIC_PROCESS	GO:0009962 regulation of flavonoid biosynthetic process, GOslim:biological_process	124	73	4.17e-11	5.57e-09
GLYCOPROTEIN_METABOLIC_PROCESS	GO:0009100 glycoprotein metabolic process, GOslim:biological_process	229	108	4.53e-11	6.03e-09
MONOCARBOXYLIC_ACID_METABOLIC_PROCESS	GO:0032787 monocarboxylic acid metabolic process, GOslim:biological_process	1480	445	4.6e-11	6.09e-09
RESPONSE_TO_JASMONIC_ACID_STIMULUS	GO:0009753 response to jasmonic acid stimulus, GOslim:biological_process	471	180	4.87e-11	6.41e-09
LIPOPROTEIN_BIOSYNTHETIC_PROCESS	GO:0042158 lipoprotein biosynthetic process, GOslim:biological_process	550	201	8.44e-11	1.1e-08
PROTEIN_LIPIDATION	GO:0006497 protein lipidation, GOslim:biological_process	550	201	8.44e-11	1.1e-08
POLYSACCHARIDE_LOCALIZATION	GO:0033037 polysaccharide localization, GOslim:biological_process	94	61	9.46e-11	1.23e-08
LIPOPROTEIN_METABOLIC_PROCESS	GO:0042157 lipoprotein metabolic process, GOslim:biological_process	551	201	9.55e-11	1.23e-08
CALLOSE_LOCALIZATION	GO:0052545 callose localization, GOslim:biological_process	93	60	1.59e-10	2.04e-08
CELL_WALL_ORGANIZATION_OR_BIOGENESIS	GO:0071554 cell wall organization or biogenesis, GOslim:biological_process	958	308	1.89e-10	2.42e-08
REGULATION_OF_SECONDARY_METABOLIC_PROCESS	GO:0043455 regulation of secondary metabolic process, GOslim:biological_process	157	82	2.42e-10	3.07e-08
LIPID_METABOLIC_PROCESS	GO:0006629 lipid metabolic process, GOslim:biological_process	1767	509	3.39e-10	4.29e-08
PROTEASOMAL_PROTEIN_CATABOLIC_PROCESS	GO:0010498 proteasomal protein catabolic process, GOslim:biological_process	211	99	3.53e-10	4.44e-08
ROOT_HAIR_ELONGATION	GO:0048767 root hair elongation, GOslim:biological_process	187	91	4.33e-10	5.41e-08
SALICYLIC_ACID_BIOSYNTHETIC_PROCESS	GO:0009697 salicylic acid biosynthetic process, GOslim:biological_process	209	98	4.43e-10	5.52e-08
ER_TO_GOLGI_VESICLE-MEDIATED_TRANSPORT	GO:0006888 ER to Golgi vesicle-mediated transport, GOslim:biological_process	105	63	4.94e-10	6.12e-08
MONOSACCHARIDE_BIOSYNTHETIC_PROCESS	GO:0046364 monosaccharide biosynthetic process, GOslim:biological_process	191	92	5.21e-10	6.43e-08
CELLULAR_CELL_WALL_MACROMOLECULE_METABOLIC_PROCESS	GO:0010382 cellular cell wall macromolecule metabolic process, GOslim:biological_process	201	95	5.91e-10	7.25e-08
DEVELOPMENTAL_PROCESS	GO:0032502 developmental process, GOslim:biological_process	4034	1039	8.31e-10	1.01e-07
SALICYLIC_ACID_METABOLIC_PROCESS	GO:0009696 salicylic acid metabolic process, GOslim:biological_process	222	101	8.62e-10	1.05e-07
CELLULAR_CARBOHYDRATE_BIOSYNTHETIC_PROCESS	GO:0034637 cellular carbohydrate biosynthetic process, GOslim:biological_process	938	298	1.02e-09	1.24e-07
SMALL_MOLECULE_CATABOLIC_PROCESS	GO:0044282 small molecule catabolic process, GOslim:biological_process	931	296	1.1e-09	1.32e-07
SYSTEM_DEVELOPMENT	GO:0048731 system development, GOslim:biological_process	2037	569	1.41e-09	1.68e-07
ORGAN_DEVELOPMENT	GO:0048513 organ development, GOslim:biological_process	2037	569	1.41e-09	1.68e-07
CELLULAR_CELL_WALL_ORGANIZATION_OR_BIOGENESIS	GO:0070882 cellular cell wall organization or biogenesis, GOslim:biological_process	364	142	1.8e-09	2.13e-07
CELLULAR_MACROMOLECULE_CATABOLIC_PROCESS	GO:0044265 cellular macromolecule catabolic process, GOslim:biological_process	1201	363	1.89e-09	2.23e-07
HEXOSE_BIOSYNTHETIC_PROCESS	GO:0019319 hexose biosynthetic process, GOslim:biological_process	182	87	2.01e-09	2.36e-07
HEMICELLULOSE_METABOLIC_PROCESS	GO:0010410 hemicellulose metabolic process, GOslim:biological_process	198	92	2.12e-09	2.47e-07
MACROMOLECULE_CATABOLIC_PROCESS	GO:0009057 macromolecule catabolic process, GOslim:biological_process	1248	374	2.39e-09	2.78e-07
MULTICELLULAR_ORGANISMAL_PROCESS	GO:0032501 multicellular organismal process, GOslim:biological_process	3963	1017	2.5e-09	2.9e-07
POST-TRANSLATIONAL_PROTEIN_MODIFICATION	GO:0043687 post-translational protein modification, GOslim:biological_process	2069	574	2.74e-09	3.16e-07
IRON_ION_TRANSPORT	GO:0006826 iron ion transport, GOslim:biological_process	126	68	2.89e-09	3.32e-07
CELLULAR_DEVELOPMENTAL_PROCESS	GO:0048869 cellular developmental process, GOslim:biological_process	1439	420	3.6e-09	4.1e-07
PROTEOLYSIS_INVOLVED_IN_CELLULAR_PROTEIN_CATABOLIC_PROCESS	GO:0051603 proteolysis involved in cellular protein catabolic process, GOslim:biological_process	494	177	3.6e-09	4.1e-07
PHOSPHORYLATION	GO:0016310 phosphorylation, GOslim:biological_process	1355	399	3.86e-09	4.36e-07
SYSTEMIC_ACQUIRED_RESISTANCE,_SALICYLIC_ACID_MEDIATED_SIGNALING_PATHWAY	GO:0009862 systemic acquired resistance, salicylic acid mediated signaling pathway, GOslim:biological_process	251	107	4.59e-09	5.17e-07
PHOSPHORUS_METABOLIC_PROCESS	GO:0006793 phosphorus metabolic process, GOslim:biological_process	1574	452	4.91e-09	5.5e-07
PHOSPHATE-CONTAINING_COMPOUND_METABOLIC_PROCESS	GO:0006796 phosphate-containing compound metabolic process, GOslim:biological_process	1573	451	6.01e-09	6.71e-07
ALCOHOL_METABOLIC_PROCESS	GO:0006066 alcohol metabolic process, GOslim:biological_process	1142	344	6.82e-09	7.58e-07
TRANSMEMBRANE_TRANSPORT	GO:0055085 transmembrane transport, GOslim:biological_process	650	217	8.32e-09	9.21e-07
ALCOHOL_BIOSYNTHETIC_PROCESS	GO:0046165 alcohol biosynthetic process, GOslim:biological_process	292	118	8.66e-09	9.54e-07
REGULATION_OF_CELLULAR_METABOLIC_PROCESS	GO:0031323 regulation of cellular metabolic process, GOslim:biological_process	2917	769	8.84e-09	9.69e-07
HEXOSE_METABOLIC_PROCESS	GO:0019318 hexose metabolic process, GOslim:biological_process	602	204	9.1e-09	9.94e-07
GLYCOLYSIS	GO:0006096 glycolysis, GOslim:biological_process	219	96	9.51e-09	1.03e-06
GROWTH	GO:0040007 growth, GOslim:biological_process	938	291	1.07e-08	1.16e-06
GLUCONEOGENESIS	GO:0006094 gluconeogenesis, GOslim:biological_process	169	80	1.22e-08	1.31e-06
RESPONSE_TO_MISFOLDED_PROTEIN	GO:0051788 response to misfolded protein, GOslim:biological_process	188	86	1.22e-08	1.31e-06
CELL_WALL_MACROMOLECULE_BIOSYNTHETIC_PROCESS	GO:0044038 cell wall macromolecule biosynthetic process, GOslim:biological_process	185	85	1.26e-08	1.34e-06
CELLULAR_COMPONENT_MACROMOLECULE_BIOSYNTHETIC_PROCESS	GO:0070589 cellular component macromolecule biosynthetic process, GOslim:biological_process	185	85	1.26e-08	1.34e-06
CELL_WALL_POLYSACCHARIDE_BIOSYNTHETIC_PROCESS	GO:0070592 cell wall polysaccharide biosynthetic process, GOslim:biological_process	185	85	1.26e-08	1.34e-06
RESPONSE_TO_GLUCOSE_STIMULUS	GO:0009749 response to glucose stimulus, GOslim:biological_process	86	52	1.28e-08	1.35e-06
MACROMOLECULE_METABOLIC_PROCESS	GO:0043170 macromolecule metabolic process, GOslim:biological_process	9200	2170	1.45e-08	1.53e-06
ANATOMICAL_STRUCTURE_DEVELOPMENT	GO:0048856 anatomical structure development, GOslim:biological_process	3344	865	1.61e-08	1.68e-06
IMMUNE_EFFECTOR_PROCESS	GO:0002252 immune effector process, GOslim:biological_process	273	111	1.82e-08	1.89e-06
PROTEIN_PHOSPHORYLATION	GO:0006468 protein phosphorylation, GOslim:biological_process	1135	339	1.81e-08	1.89e-06
PROTEOLYSIS	GO:0006508 proteolysis, GOslim:biological_process	940	289	2.41e-08	2.49e-06
REGULATION_OF_METABOLIC_PROCESS	GO:0019222 regulation of metabolic process, GOslim:biological_process	3154	819	2.43e-08	2.5e-06
CELLULAR_RESPONSE_TO_JASMONIC_ACID_STIMULUS	GO:0071395 cellular response to jasmonic acid stimulus, GOslim:biological_process	282	113	2.53e-08	2.57e-06
JASMONIC_ACID_MEDIATED_SIGNALING_PATHWAY	GO:0009867 jasmonic acid mediated signaling pathway, GOslim:biological_process	282	113	2.53e-08	2.57e-06
REGULATION_OF_CELL_SIZE	GO:0008361 regulation of cell size, GOslim:biological_process	734	236	2.53e-08	2.57e-06
REGULATION_OF_HORMONE_LEVELS	GO:0010817 regulation of hormone levels, GOslim:biological_process	453	161	2.77e-08	2.81e-06
XYLAN_METABOLIC_PROCESS	GO:0045491 xylan metabolic process, GOslim:biological_process	186	84	2.79e-08	2.81e-06
AMINO_ACID_IMPORT	GO:0043090 amino acid import, GOslim:biological_process	75	47	2.81e-08	2.82e-06
XYLAN_BIOSYNTHETIC_PROCESS	GO:0045492 xylan biosynthetic process, GOslim:biological_process	183	83	2.9e-08	2.9e-06
RESPONSE_TO_BACTERIUM	GO:0009617 response to bacterium, GOslim:biological_process	572	193	2.93e-08	2.92e-06
METHIONINE_METABOLIC_PROCESS	GO:0006555 methionine metabolic process, GOslim:biological_process	236	99	3.16e-08	3.14e-06
PROTEIN_CATABOLIC_PROCESS	GO:0030163 protein catabolic process, GOslim:biological_process	537	183	3.77e-08	3.73e-06
PROTEASOME_ASSEMBLY	GO:0043248 proteasome assembly, GOslim:biological_process	182	82	4.38e-08	4.3e-06
GLUCURONOXYLAN_METABOLIC_PROCESS	GO:0010413 glucuronoxylan metabolic process, GOslim:biological_process	182	82	4.38e-08	4.3e-06
REGULATION_OF_CELLULAR_BIOSYNTHETIC_PROCESS	GO:0031326 regulation of cellular biosynthetic process, GOslim:biological_process	2623	692	5.03e-08	4.91e-06
POLYSACCHARIDE_METABOLIC_PROCESS	GO:0005976 polysaccharide metabolic process, GOslim:biological_process	707	227	5.09e-08	4.96e-06
REGULATION_OF_CELLULAR_COMPONENT_SIZE	GO:0032535 regulation of cellular component size, GOslim:biological_process	746	237	5.27e-08	5.09e-06
REGULATION_OF_ANATOMICAL_STRUCTURE_SIZE	GO:0090066 regulation of anatomical structure size, GOslim:biological_process	746	237	5.27e-08	5.09e-06
ALKENE_BIOSYNTHETIC_PROCESS	GO:0043450 alkene biosynthetic process, GOslim:biological_process	133	66	5.75e-08	5.51e-06
CELLULAR_ALKENE_METABOLIC_PROCESS	GO:0043449 cellular alkene metabolic process, GOslim:biological_process	133	66	5.75e-08	5.51e-06
REGULATION_OF_BIOSYNTHETIC_PROCESS	GO:0009889 regulation of biosynthetic process, GOslim:biological_process	2626	692	5.8e-08	5.54e-06
PROTEASOMAL_UBIQUITIN-DEPENDENT_PROTEIN_CATABOLIC_PROCESS	GO:0043161 proteasomal ubiquitin-dependent protein catabolic process, GOslim:biological_process	127	64	5.88e-08	5.57e-06
HYPEROSMOTIC_RESPONSE	GO:0006972 hyperosmotic response, GOslim:biological_process	250	102	5.87e-08	5.57e-06
CELL_GROWTH	GO:0016049 cell growth, GOslim:biological_process	710	227	6.69e-08	6.31e-06
RESPONSE_TO_GRAVITY	GO:0009629 response to gravity, GOslim:biological_process	162	75	6.9e-08	6.49e-06
ETHYLENE_MEDIATED_SIGNALING_PATHWAY	GO:0009873 ethylene mediated signaling pathway, GOslim:biological_process	125	63	7.4e-08	6.93e-06
CELLULAR_PROTEIN_CATABOLIC_PROCESS	GO:0044257 cellular protein catabolic process, GOslim:biological_process	522	177	8.25e-08	7.7e-06
REGULATION_OF_PRIMARY_METABOLIC_PROCESS	GO:0080090 regulation of primary metabolic process, GOslim:biological_process	2751	719	8.88e-08	8.26e-06
CELL_DEVELOPMENT	GO:0048468 cell development, GOslim:biological_process	694	222	9.01e-08	8.34e-06
CELL_WALL_BIOGENESIS	GO:0042546 cell wall biogenesis, GOslim:biological_process	333	125	9.14e-08	8.43e-06
COUMARIN_METABOLIC_PROCESS	GO:0009804 coumarin metabolic process, GOslim:biological_process	55	38	9.54e-08	8.78e-06
MULTICELLULAR_ORGANISMAL_DEVELOPMENT	GO:0007275 multicellular organismal development, GOslim:biological_process	3807	961	1.03e-07	9.41e-06
ETHYLENE_METABOLIC_PROCESS	GO:0009692 ethylene metabolic process, GOslim:biological_process	131	64	1.4e-07	1.27e-05
ETHYLENE_BIOSYNTHETIC_PROCESS	GO:0009693 ethylene biosynthetic process, GOslim:biological_process	131	64	1.4e-07	1.27e-05
TROPISM	GO:0009606 tropism, GOslim:biological_process	166	75	1.48e-07	1.33e-05
GLUCOSE_METABOLIC_PROCESS	GO:0006006 glucose metabolic process, GOslim:biological_process	554	184	1.47e-07	1.33e-05
LIPID_MODIFICATION	GO:0030258 lipid modification, GOslim:biological_process	222	92	1.47e-07	1.33e-05
CELLULAR_RESPONSE_TO_ETHYLENE_STIMULUS	GO:0071369 cellular response to ethylene stimulus, GOslim:biological_process	144	68	1.56e-07	1.4e-05
MAPK_CASCADE	GO:0000165 MAPK cascade, GOslim:biological_process	209	88	1.57e-07	1.4e-05
COUMARIN_BIOSYNTHETIC_PROCESS	GO:0009805 coumarin biosynthetic process, GOslim:biological_process	54	37	1.63e-07	1.45e-05
STEROID_METABOLIC_PROCESS	GO:0008202 steroid metabolic process, GOslim:biological_process	247	99	1.77e-07	1.57e-05
CELLULAR_MEMBRANE_FUSION	GO:0006944 cellular membrane fusion, GOslim:biological_process	275	107	1.87e-07	1.65e-05
MEMBRANE_FUSION	GO:0061025 membrane fusion, GOslim:biological_process	275	107	1.87e-07	1.65e-05
RESPONSE_TO_COLD	GO:0009409 response to cold, GOslim:biological_process	622	201	2.01e-07	1.77e-05
HORMONE_METABOLIC_PROCESS	GO:0042445 hormone metabolic process, GOslim:biological_process	322	120	2.21e-07	1.93e-05
CELLULAR_MACROMOLECULE_METABOLIC_PROCESS	GO:0044260 cellular macromolecule metabolic process, GOslim:biological_process	8586	2015	2.62e-07	2.28e-05
CARBOXYLIC_ACID_BIOSYNTHETIC_PROCESS	GO:0046394 carboxylic acid biosynthetic process, GOslim:biological_process	1113	324	2.82e-07	2.44e-05
ORGANIC_ACID_BIOSYNTHETIC_PROCESS	GO:0016053 organic acid biosynthetic process, GOslim:biological_process	1113	324	2.82e-07	2.44e-05
BRASSINOSTEROID_METABOLIC_PROCESS	GO:0016131 brassinosteroid metabolic process, GOslim:biological_process	122	60	2.84e-07	2.45e-05
INTRACELLULAR_PROTEIN_KINASE_CASCADE	GO:0007243 intracellular protein kinase cascade, GOslim:biological_process	223	91	2.93e-07	2.52e-05
HYDROGEN_PEROXIDE_METABOLIC_PROCESS	GO:0042743 hydrogen peroxide metabolic process, GOslim:biological_process	335	123	2.96e-07	2.54e-05
UBIQUITIN-DEPENDENT_PROTEIN_CATABOLIC_PROCESS	GO:0006511 ubiquitin-dependent protein catabolic process, GOslim:biological_process	404	142	2.97e-07	2.54e-05
GRAVITROPISM	GO:0009630 gravitropism, GOslim:biological_process	154	70	3.16e-07	2.69e-05
MODIFICATION-DEPENDENT_MACROMOLECULE_CATABOLIC_PROCESS	GO:0043632 modification-dependent macromolecule catabolic process, GOslim:biological_process	409	143	3.46e-07	2.92e-05
MODIFICATION-DEPENDENT_PROTEIN_CATABOLIC_PROCESS	GO:0019941 modification-dependent protein catabolic process, GOslim:biological_process	409	143	3.46e-07	2.92e-05
PHYTOSTEROID_METABOLIC_PROCESS	GO:0016128 phytosteroid metabolic process, GOslim:biological_process	123	60	3.51e-07	2.95e-05
BRASSINOSTEROID_BIOSYNTHETIC_PROCESS	GO:0016132 brassinosteroid biosynthetic process, GOslim:biological_process	117	58	3.63e-07	3.05e-05
PHYTOSTEROID_BIOSYNTHETIC_PROCESS	GO:0016129 phytosteroid biosynthetic process, GOslim:biological_process	118	58	4.5e-07	3.76e-05
OXYGEN_AND_REACTIVE_OXYGEN_SPECIES_METABOLIC_PROCESS	GO:0006800 oxygen and reactive oxygen species metabolic process, GOslim:biological_process	347	125	5.34e-07	4.46e-05
PROTEIN_MODIFICATION_BY_SMALL_PROTEIN_CONJUGATION_OR_REMOVAL	GO:0070647 protein modification by small protein conjugation or removal, GOslim:biological_process	413	143	5.4e-07	4.49e-05
CELLULAR_POLYSACCHARIDE_METABOLIC_PROCESS	GO:0044264 cellular polysaccharide metabolic process, GOslim:biological_process	596	191	6.31e-07	5.23e-05
ASPARTATE_FAMILY_AMINO_ACID_METABOLIC_PROCESS	GO:0009066 aspartate family amino acid metabolic process, GOslim:biological_process	277	105	6.5e-07	5.36e-05
ACETYL-COA_METABOLIC_PROCESS	GO:0006084 acetyl-CoA metabolic process, GOslim:biological_process	114	56	7.14e-07	5.87e-05
RESPONSE_TO_AUXIN_STIMULUS	GO:0009733 response to auxin stimulus, GOslim:biological_process	425	145	8.87e-07	7.28e-05
CELLULAR_CARBOHYDRATE_CATABOLIC_PROCESS	GO:0044275 cellular carbohydrate catabolic process, GOslim:biological_process	543	176	9.64e-07	7.88e-05
DEVELOPMENTAL_GROWTH	GO:0048589 developmental growth, GOslim:biological_process	781	237	9.72e-07	7.92e-05
STEROID_BIOSYNTHETIC_PROCESS	GO:0006694 steroid biosynthetic process, GOslim:biological_process	221	88	1.03e-06	8.33e-05
HORMONE_BIOSYNTHETIC_PROCESS	GO:0042446 hormone biosynthetic process, GOslim:biological_process	277	104	1.04e-06	8.43e-05
DEFENSE_RESPONSE_TO_BACTERIUM	GO:0042742 defense response to bacterium, GOslim:biological_process	390	135	1.12e-06	9.01e-05
RESPONSE_TO_ORGANIC_CYCLIC_COMPOUND	GO:0014070 response to organic cyclic compound, GOslim:biological_process	148	66	1.13e-06	9.1e-05
RESPONSE_TO_CYCLOPENTENONE	GO:0010583 response to cyclopentenone, GOslim:biological_process	148	66	1.13e-06	9.1e-05
AGING	GO:0007568 aging, GOslim:biological_process	145	65	1.18e-06	9.47e-05
CYTOSKELETON_ORGANIZATION	GO:0007010 cytoskeleton organization, GOslim:biological_process	505	165	1.41e-06	0.000112
CELLULAR_POLYSACCHARIDE_BIOSYNTHETIC_PROCESS	GO:0033692 cellular polysaccharide biosynthetic process, GOslim:biological_process	520	168	1.97e-06	0.000156
POLYSACCHARIDE_BIOSYNTHETIC_PROCESS	GO:0000271 polysaccharide biosynthetic process, GOslim:biological_process	587	185	2.23e-06	0.000177
PROTEASOME_CORE_COMPLEX_ASSEMBLY	GO:0080129 proteasome core complex assembly, GOslim:biological_process	126	58	2.28e-06	0.00018
CELLULAR_LIPID_METABOLIC_PROCESS	GO:0044255 cellular lipid metabolic process, GOslim:biological_process	1394	384	2.34e-06	0.000184
CELL_DIFFERENTIATION	GO:0030154 cell differentiation, GOslim:biological_process	1116	316	2.9e-06	0.000227
AMINE_METABOLIC_PROCESS	GO:0009308 amine metabolic process, GOslim:biological_process	1030	295	2.9e-06	0.000227
ORGAN_SENESCENCE	GO:0010260 organ senescence, GOslim:biological_process	96	48	2.95e-06	0.000229
SENESCENCE	GO:0010149 senescence, GOslim:biological_process	96	48	2.95e-06	0.000229
CARBOHYDRATE_CATABOLIC_PROCESS	GO:0016052 carbohydrate catabolic process, GOslim:biological_process	571	180	3e-06	0.000233
MONOSACCHARIDE_METABOLIC_PROCESS	GO:0005996 monosaccharide metabolic process, GOslim:biological_process	804	239	3.02e-06	0.000233
REGULATION_OF_ANION_CHANNEL_ACTIVITY	GO:0010359 regulation of anion channel activity, GOslim:biological_process	32	25	3.13e-06	0.000237
REGULATION_OF_TRANSPORTER_ACTIVITY	GO:0032409 regulation of transporter activity, GOslim:biological_process	32	25	3.13e-06	0.000237
REGULATION_OF_TRANSMEMBRANE_TRANSPORTER_ACTIVITY	GO:0022898 regulation of transmembrane transporter activity, GOslim:biological_process	32	25	3.13e-06	0.000237
REGULATION_OF_ION_TRANSMEMBRANE_TRANSPORTER_ACTIVITY	GO:0032412 regulation of ion transmembrane transporter activity, GOslim:biological_process	32	25	3.13e-06	0.000237
REGULATION_OF_TRANSMEMBRANE_TRANSPORT	GO:0034762 regulation of transmembrane transport, GOslim:biological_process	32	25	3.13e-06	0.000237
REGULATION_OF_ION_TRANSMEMBRANE_TRANSPORT	GO:0034765 regulation of ion transmembrane transport, GOslim:biological_process	32	25	3.13e-06	0.000237
CELLULAR_COMPONENT_ORGANIZATION	GO:0016043 cellular component organization, GOslim:biological_process	3130	785	4.12e-06	0.000311
RESPONSE_TO_REACTIVE_OXYGEN_SPECIES	GO:0000302 response to reactive oxygen species, GOslim:biological_process	336	117	4.47e-06	0.000336
RESPONSE_TO_MECHANICAL_STIMULUS	GO:0009612 response to mechanical stimulus, GOslim:biological_process	63	36	5.42e-06	0.000407
LIPID_OXIDATION	GO:0034440 lipid oxidation, GOslim:biological_process	182	73	6.65e-06	0.000498
D-XYLOSE_METABOLIC_PROCESS	GO:0042732 D-xylose metabolic process, GOslim:biological_process	35	25	9.51e-06	0.00071
HEXOSE_CATABOLIC_PROCESS	GO:0019320 hexose catabolic process, GOslim:biological_process	476	152	9.8e-06	0.000729
FATTY_ACID_BETA-OXIDATION	GO:0006635 fatty acid beta-oxidation, GOslim:biological_process	171	69	1e-05	0.000742
HYPEROSMOTIC_SALINITY_RESPONSE	GO:0042538 hyperosmotic salinity response, GOslim:biological_process	161	66	1.03e-05	0.000764
RESPONSE_TO_HEAT	GO:0009408 response to heat, GOslim:biological_process	303	106	1.04e-05	0.000768
MONOSACCHARIDE_CATABOLIC_PROCESS	GO:0046365 monosaccharide catabolic process, GOslim:biological_process	480	152	1.4e-05	0.00103
RESPONSE_TO_DISACCHARIDE_STIMULUS	GO:0034285 response to disaccharide stimulus, GOslim:biological_process	212	80	1.48e-05	0.00109
FATTY_ACID_METABOLIC_PROCESS	GO:0006631 fatty acid metabolic process, GOslim:biological_process	587	179	1.57e-05	0.00115
RESPONSE_TO_SUCROSE_STIMULUS	GO:0009744 response to sucrose stimulus, GOslim:biological_process	209	79	1.59e-05	0.00116
GLUCOSE_CATABOLIC_PROCESS	GO:0006007 glucose catabolic process, GOslim:biological_process	474	150	1.63e-05	0.00119
GOLGI_ORGANIZATION	GO:0007030 Golgi organization, GOslim:biological_process	178	70	1.7e-05	0.00123
ALCOHOL_CATABOLIC_PROCESS	GO:0046164 alcohol catabolic process, GOslim:biological_process	491	154	1.86e-05	0.00134
PROTEIN_N-LINKED_GLYCOSYLATION	GO:0006487 protein N-linked glycosylation, GOslim:biological_process	105	48	1.87e-05	0.00135
PROTEIN_METABOLIC_PROCESS	GO:0019538 protein metabolic process, GOslim:biological_process	5207	1240	1.88e-05	0.00135
HYDROGEN_PEROXIDE_BIOSYNTHETIC_PROCESS	GO:0050665 hydrogen peroxide biosynthetic process, GOslim:biological_process	80	40	1.89e-05	0.00136
SULFUR_COMPOUND_METABOLIC_PROCESS	GO:0006790 sulfur compound metabolic process, GOslim:biological_process	682	202	2.04e-05	0.00146
TWO-COMPONENT_SIGNAL_TRANSDUCTION_SYSTEM_(PHOSPHORELAY)	GO:0000160 two-component signal transduction system (phosphorelay), GOslim:biological_process	169	67	2.08e-05	0.00148
FATTY_ACID_OXIDATION	GO:0019395 fatty acid oxidation, GOslim:biological_process	176	69	2.11e-05	0.00149
REGULATION_OF_ANION_TRANSPORT	GO:0044070 regulation of anion transport, GOslim:biological_process	40	26	2.11e-05	0.00149
CELLULAR_MODIFIED_AMINO_ACID_CATABOLIC_PROCESS	GO:0042219 cellular modified amino acid catabolic process, GOslim:biological_process	142	59	2.16e-05	0.00153
CELLULAR_AMINE_METABOLIC_PROCESS	GO:0044106 cellular amine metabolic process, GOslim:biological_process	944	266	2.3e-05	0.00162
RESPONSE_TO_HYDROGEN_PEROXIDE	GO:0042542 response to hydrogen peroxide, GOslim:biological_process	263	93	2.51e-05	0.00177
ANATOMICAL_STRUCTURE_MORPHOGENESIS	GO:0009653 anatomical structure morphogenesis, GOslim:biological_process	1762	459	2.93e-05	0.00206
RESPONSE_TO_MOLECULE_OF_BACTERIAL_ORIGIN	GO:0002237 response to molecule of bacterial origin, GOslim:biological_process	101	46	2.96e-05	0.00207
PROTEIN_DESUMOYLATION	GO:0016926 protein desumoylation, GOslim:biological_process	80	39	3.69e-05	0.00257
CELL_MORPHOGENESIS	GO:0000902 cell morphogenesis, GOslim:biological_process	687	201	3.88e-05	0.0027
REGULATION_OF_RNA_METABOLIC_PROCESS	GO:0051252 regulation of RNA metabolic process, GOslim:biological_process	2384	600	4.61e-05	0.00319
POSITIVE_REGULATION_OF_BIOLOGICAL_PROCESS	GO:0048518 positive regulation of biological process, GOslim:biological_process	886	249	4.78e-05	0.0033
REGULATION_OF_TRANSCRIPTION,_DNA-DEPENDENT	GO:0006355 regulation of transcription, DNA-dependent, GOslim:biological_process	2370	595	6.18e-05	0.00426
PROTEIN_MODIFICATION_BY_SMALL_PROTEIN_REMOVAL	GO:0070646 protein modification by small protein removal, GOslim:biological_process	184	69	6.4e-05	0.0044
VACUOLAR_TRANSPORT	GO:0007034 vacuolar transport, GOslim:biological_process	129	53	6.93e-05	0.00475
CELLULAR_PROTEIN_METABOLIC_PROCESS	GO:0044267 cellular protein metabolic process, GOslim:biological_process	4762	1130	7.86e-05	0.00537
NUCLEOTIDE-SUGAR_METABOLIC_PROCESS	GO:0009225 nucleotide-sugar metabolic process, GOslim:biological_process	39	24	8.15e-05	0.00555
DETECTION_OF_STIMULUS	GO:0051606 detection of stimulus, GOslim:biological_process	148	58	9.2e-05	0.00625
CALCIUM_ION_TRANSPORT	GO:0006816 calcium ion transport, GOslim:biological_process	121	50	9.77e-05	0.00662
NEGATIVE_REGULATION_OF_RNA_METABOLIC_PROCESS	GO:0051253 negative regulation of RNA metabolic process, GOslim:biological_process	398	125	0.000102	0.00691
NEGATIVE_REGULATION_OF_TRANSCRIPTION,_DNA-DEPENDENT	GO:0045892 negative regulation of transcription, DNA-dependent, GOslim:biological_process	398	125	0.000102	0.00691
RESPONSE_TO_HEXOSE_STIMULUS	GO:0009746 response to hexose stimulus, GOslim:biological_process	170	64	0.000105	0.00706
RESPONSE_TO_MONOSACCHARIDE_STIMULUS	GO:0034284 response to monosaccharide stimulus, GOslim:biological_process	170	64	0.000105	0.00706
SULFUR_AMINO_ACID_METABOLIC_PROCESS	GO:0000096 sulfur amino acid metabolic process, GOslim:biological_process	465	142	0.000106	0.0071
RESPONSE_TO_INSECT	GO:0009625 response to insect, GOslim:biological_process	76	36	0.000113	0.00752
LIPID_CATABOLIC_PROCESS	GO:0016042 lipid catabolic process, GOslim:biological_process	262	89	0.000117	0.00778
LEAF_SENESCENCE	GO:0010150 leaf senescence, GOslim:biological_process	70	34	0.000119	0.00789
CELLULAR_COMPONENT_MORPHOGENESIS	GO:0032989 cellular component morphogenesis, GOslim:biological_process	742	210	0.00013	0.00863
POST-EMBRYONIC_ROOT_DEVELOPMENT	GO:0048528 post-embryonic root development, GOslim:biological_process	130	52	0.000138	0.00908
REGULATION_OF_MACROMOLECULE_BIOSYNTHETIC_PROCESS	GO:0010556 regulation of macromolecule biosynthetic process, GOslim:biological_process	2488	616	0.000155	0.0102
NEGATIVE_REGULATION_OF_MACROMOLECULE_BIOSYNTHETIC_PROCESS	GO:0010558 negative regulation of macromolecule biosynthetic process, GOslim:biological_process	416	128	0.000174	0.0114
PROTEIN_TARGETING_TO_VACUOLE	GO:0006623 protein targeting to vacuole, GOslim:biological_process	118	48	0.000178	0.0117
REGULATION_OF_CELL_COMMUNICATION	GO:0010646 regulation of cell communication, GOslim:biological_process	171	63	0.000192	0.0125
RESPONSE_TO_ZINC_ION	GO:0010043 response to zinc ion, GOslim:biological_process	60	30	0.000198	0.0129
CELLULAR_LIPID_CATABOLIC_PROCESS	GO:0044242 cellular lipid catabolic process, GOslim:biological_process	252	85	0.000198	0.0129
CELLULOSE_METABOLIC_PROCESS	GO:0030243 cellulose metabolic process, GOslim:biological_process	150	57	0.0002	0.013
ION_TRANSMEMBRANE_TRANSPORT	GO:0034220 ion transmembrane transport, GOslim:biological_process	133	52	0.000215	0.0139
PENTOSE_METABOLIC_PROCESS	GO:0019321 pentose metabolic process, GOslim:biological_process	73	34	0.00022	0.0142
NEGATIVE_REGULATION_OF_BIOSYNTHETIC_PROCESS	GO:0009890 negative regulation of biosynthetic process, GOslim:biological_process	423	129	0.000223	0.0143
NEGATIVE_REGULATION_OF_CELLULAR_BIOSYNTHETIC_PROCESS	GO:0031327 negative regulation of cellular biosynthetic process, GOslim:biological_process	423	129	0.000223	0.0143
CELLULAR_AMINO_ACID_METABOLIC_PROCESS	GO:0006520 cellular amino acid metabolic process, GOslim:biological_process	880	241	0.00023	0.0147
RESPONSE_TO_FRUCTOSE_STIMULUS	GO:0009750 response to fructose stimulus, GOslim:biological_process	144	55	0.000231	0.0148
REGULATION_OF_NUCLEOBASE-CONTAINING_COMPOUND_METABOLIC_PROCESS	GO:0019219 regulation of nucleobase-containing compound metabolic process, GOslim:biological_process	2492	614	0.000239	0.0152
REGULATION_OF_GENE_EXPRESSION	GO:0010468 regulation of gene expression, GOslim:biological_process	2669	654	0.00024	0.0152
LATERAL_ROOT_DEVELOPMENT	GO:0048527 lateral root development, GOslim:biological_process	120	48	0.000243	0.0154
FLUID_TRANSPORT	GO:0042044 fluid transport, GOslim:biological_process	155	58	0.000244	0.0154
WATER_TRANSPORT	GO:0006833 water transport, GOslim:biological_process	155	58	0.000244	0.0154
PECTIN_METABOLIC_PROCESS	GO:0045488 pectin metabolic process, GOslim:biological_process	49	26	0.000255	0.016
NEGATIVE_REGULATION_OF_NITROGEN_COMPOUND_METABOLIC_PROCESS	GO:0051172 negative regulation of nitrogen compound metabolic process, GOslim:biological_process	413	126	0.000258	0.0162
CELLULAR_BIOGENIC_AMINE_CATABOLIC_PROCESS	GO:0042402 cellular biogenic amine catabolic process, GOslim:biological_process	117	47	0.000259	0.0162
POSITIVE_REGULATION_OF_CELLULAR_PROCESS	GO:0048522 positive regulation of cellular process, GOslim:biological_process	787	218	0.000268	0.0167
REGULATION_OF_NITROGEN_COMPOUND_METABOLIC_PROCESS	GO:0051171 regulation of nitrogen compound metabolic process, GOslim:biological_process	2509	617	0.000271	0.0168
RESPONSE_TO_KARRIKIN	GO:0080167 response to karrikin, GOslim:biological_process	128	50	0.000285	0.0176
DETECTION_OF_BIOTIC_STIMULUS	GO:0009595 detection of biotic stimulus, GOslim:biological_process	104	43	0.000285	0.0176
REGULATION_OF_MACROMOLECULE_METABOLIC_PROCESS	GO:0060255 regulation of macromolecule metabolic process, GOslim:biological_process	2803	683	0.000285	0.0176
REGULATION_OF_SIGNAL_TRANSDUCTION	GO:0009966 regulation of signal transduction, GOslim:biological_process	167	61	0.000288	0.0177
REGULATION_OF_SIGNALING	GO:0023051 regulation of signaling, GOslim:biological_process	167	61	0.000288	0.0177
NEGATIVE_REGULATION_OF_NUCLEOBASE-CONTAINING_COMPOUND_METABOLIC_PROCESS	GO:0045934 negative regulation of nucleobase-containing compound metabolic process, GOslim:biological_process	411	125	0.000302	0.0185
DI-,_TRI-VALENT_INORGANIC_CATION_HOMEOSTASIS	GO:0055066 di-, tri-valent inorganic cation homeostasis, GOslim:biological_process	101	42	0.000303	0.0185
NEGATIVE_REGULATION_OF_CELLULAR_METABOLIC_PROCESS	GO:0031324 negative regulation of cellular metabolic process, GOslim:biological_process	447	134	0.000309	0.0189
FATTY_ACID_CATABOLIC_PROCESS	GO:0009062 fatty acid catabolic process, GOslim:biological_process	220	75	0.000351	0.0213
RESPONSE_TO_NEMATODE	GO:0009624 response to nematode, GOslim:biological_process	82	36	0.000357	0.0216
REGULATION_OF_HYDROGEN_PEROXIDE_METABOLIC_PROCESS	GO:0010310 regulation of hydrogen peroxide metabolic process, GOslim:biological_process	187	66	0.000361	0.0219
REGULATION_OF_OXYGEN_AND_REACTIVE_OXYGEN_SPECIES_METABOLIC_PROCESS	GO:0080010 regulation of oxygen and reactive oxygen species metabolic process, GOslim:biological_process	188	66	0.000406	0.0245
CELLULOSE_BIOSYNTHETIC_PROCESS	GO:0030244 cellulose biosynthetic process, GOslim:biological_process	103	42	0.000419	0.0252
CELLULAR_BIOGENIC_AMINE_METABOLIC_PROCESS	GO:0006576 cellular biogenic amine metabolic process, GOslim:biological_process	181	64	0.000421	0.0253
POSITIVE_REGULATION_OF_RESPONSE_TO_STIMULUS	GO:0048584 positive regulation of response to stimulus, GOslim:biological_process	84	36	0.000508	0.0305
NUCLEOTIDE_BIOSYNTHETIC_PROCESS	GO:0009165 nucleotide biosynthetic process, GOslim:biological_process	336	104	0.000562	0.0336
LIPID_BIOSYNTHETIC_PROCESS	GO:0008610 lipid biosynthetic process, GOslim:biological_process	1156	302	0.00057	0.0339
AMMONIUM_TRANSPORT	GO:0015696 ammonium transport, GOslim:biological_process	29	18	0.000569	0.0339
BASIC_AMINO_ACID_TRANSPORT	GO:0015802 basic amino acid transport, GOslim:biological_process	29	18	0.000569	0.0339
RESPONSE_TO_LIGHT_INTENSITY	GO:0009642 response to light intensity, GOslim:biological_process	278	89	0.000574	0.034
CELL_WALL_PECTIN_METABOLIC_PROCESS	GO:0052546 cell wall pectin metabolic process, GOslim:biological_process	32	19	0.000606	0.0358
NUCLEOTIDE_TRANSPORT	GO:0006862 nucleotide transport, GOslim:biological_process	35	20	0.000632	0.0373
SPHINGOID_METABOLIC_PROCESS	GO:0046519 sphingoid metabolic process, GOslim:biological_process	53	26	0.000637	0.0375
ORGANIC_ACID_CATABOLIC_PROCESS	GO:0016054 organic acid catabolic process, GOslim:biological_process	401	120	0.000648	0.0379
CARBOXYLIC_ACID_CATABOLIC_PROCESS	GO:0046395 carboxylic acid catabolic process, GOslim:biological_process	401	120	0.000648	0.0379
ZINC_ION_HOMEOSTASIS	GO:0055069 zinc ion homeostasis, GOslim:biological_process	24	16	0.00065	0.038
RESPONSE_TO_LIGHT_STIMULUS	GO:0009416 response to light stimulus, GOslim:biological_process	1182	307	0.0007	0.0408
ORGANIC_CATION_TRANSPORT	GO:0015695 organic cation transport, GOslim:biological_process	30	18	0.000764	0.0444
NITROGEN_COMPOUND_METABOLIC_PROCESS	GO:0006807 nitrogen compound metabolic process, GOslim:biological_process	5653	1305	0.00077	0.0447
STEROL_METABOLIC_PROCESS	GO:0016125 sterol metabolic process, GOslim:biological_process	172	60	0.000817	0.0473
RESPONSE_TO_RADIATION	GO:0009314 response to radiation, GOslim:biological_process	1257	323	0.000913	0.0527
SPHINGOLIPID_METABOLIC_PROCESS	GO:0006665 sphingolipid metabolic process, GOslim:biological_process	68	30	0.000996	0.0573
CELLULAR_ZINC_ION_HOMEOSTASIS	GO:0006882 cellular zinc ion homeostasis, GOslim:biological_process	20	14	0.000996	0.0573
PROTEIN_UBIQUITINATION	GO:0016567 protein ubiquitination, GOslim:biological_process	261	83	0.00101	0.0578
RESPONSE_TO_OXYGEN_LEVELS	GO:0070482 response to oxygen levels, GOslim:biological_process	103	40	0.00119	0.0682
REGULATION_OF_CATABOLIC_PROCESS	GO:0009894 regulation of catabolic process, GOslim:biological_process	26	16	0.00121	0.0693
RESPONSE_TO_HYPOXIA	GO:0001666 response to hypoxia, GOslim:biological_process	100	39	0.00128	0.0728
PHOSPHATE_ION_TRANSPORT	GO:0006817 phosphate ion transport, GOslim:biological_process	29	17	0.00128	0.0728
STEROL_BIOSYNTHETIC_PROCESS	GO:0016126 sterol biosynthetic process, GOslim:biological_process	165	57	0.0013	0.0738
POLYAMINE_CATABOLIC_PROCESS	GO:0006598 polyamine catabolic process, GOslim:biological_process	38	20	0.00136	0.0769
DEVELOPMENTAL_CELL_GROWTH	GO:0048588 developmental cell growth, GOslim:biological_process	436	126	0.00142	0.0799
AEROBIC_RESPIRATION	GO:0009060 aerobic respiration, GOslim:biological_process	57	26	0.00145	0.0817
HETEROCYCLE_METABOLIC_PROCESS	GO:0046483 heterocycle metabolic process, GOslim:biological_process	1020	265	0.00154	0.0868
RESPONSE_TO_UV	GO:0009411 response to UV, GOslim:biological_process	247	78	0.00163	0.0916
COENZYME_CATABOLIC_PROCESS	GO:0009109 coenzyme catabolic process, GOslim:biological_process	30	17	0.00168	0.0943
CELLULAR_NITROGEN_COMPOUND_METABOLIC_PROCESS	GO:0034641 cellular nitrogen compound metabolic process, GOslim:biological_process	1369	345	0.00177	0.0989
CELL_WALL_ORGANIZATION	GO:0071555 cell wall organization, GOslim:biological_process	609	167	0.00185	0.1029
REGULATION_OF_MULTI-ORGANISM_PROCESS	GO:0043900 regulation of multi-organism process, GOslim:biological_process	117	43	0.0019	0.1054
ION_HOMEOSTASIS	GO:0050801 ion homeostasis, GOslim:biological_process	234	74	0.00205	0.1135
PROTEIN_MODIFICATION_BY_SMALL_PROTEIN_CONJUGATION	GO:0032446 protein modification by small protein conjugation, GOslim:biological_process	281	86	0.00207	0.1144
AROMATIC_COMPOUND_CATABOLIC_PROCESS	GO:0019439 aromatic compound catabolic process, GOslim:biological_process	107	40	0.00209	0.1153
INDOLE-CONTAINING_COMPOUND_METABOLIC_PROCESS	GO:0042430 indole-containing compound metabolic process, GOslim:biological_process	148	51	0.00235	0.1295
PROTEIN_LOCALIZATION_TO_ORGANELLE	GO:0033365 protein localization to organelle, GOslim:biological_process	271	83	0.0024	0.1319
CERAMIDE_METABOLIC_PROCESS	GO:0006672 ceramide metabolic process, GOslim:biological_process	20	13	0.00241	0.1323
POSITIVE_REGULATION_OF_DEFENSE_RESPONSE	GO:0031349 positive regulation of defense response, GOslim:biological_process	47	22	0.00253	0.1387
NEUTRAL_AMINO_ACID_TRANSPORT	GO:0015804 neutral amino acid transport, GOslim:biological_process	77	31	0.0026	0.1418
PROTEIN_IMPORT	GO:0017038 protein import, GOslim:biological_process	368	107	0.00262	0.1429
ACETYL-COA_CATABOLIC_PROCESS	GO:0046356 acetyl-CoA catabolic process, GOslim:biological_process	26	15	0.00272	0.1477
TRICARBOXYLIC_ACID_CYCLE	GO:0006099 tricarboxylic acid cycle, GOslim:biological_process	26	15	0.00272	0.1477
PROLINE_TRANSPORT	GO:0015824 proline transport, GOslim:biological_process	74	30	0.00278	0.1503
DIVALENT_METAL_ION_TRANSPORT	GO:0070838 divalent metal ion transport, GOslim:biological_process	195	63	0.00281	0.1517
CELL_WALL_THICKENING	GO:0052386 cell wall thickening, GOslim:biological_process	48	22	0.0031	0.1669
TRICHOME_DIFFERENTIATION	GO:0010026 trichome differentiation, GOslim:biological_process	166	55	0.00325	0.1745
HAIR_CELL_DIFFERENTIATION	GO:0035315 hair cell differentiation, GOslim:biological_process	166	55	0.00325	0.1745
TRICHOME_MORPHOGENESIS	GO:0010090 trichome morphogenesis, GOslim:biological_process	151	51	0.00327	0.1754
CHEMICAL_HOMEOSTASIS	GO:0048878 chemical homeostasis, GOslim:biological_process	275	83	0.00332	0.1772
RESPONSE_TO_SYMBIONT	GO:0009608 response to symbiont, GOslim:biological_process	39	19	0.00345	0.1839
SECOND-MESSENGER-MEDIATED_SIGNALING	GO:0019932 second-messenger-mediated signaling, GOslim:biological_process	79	31	0.00353	0.1877
SMALL_GTPASE_MEDIATED_SIGNAL_TRANSDUCTION	GO:0007264 small GTPase mediated signal transduction, GOslim:biological_process	148	50	0.00355	0.1885
CARBOHYDRATE_TRANSPORT	GO:0008643 carbohydrate transport, GOslim:biological_process	49	22	0.00376	0.1992
DEFENSE_RESPONSE_BY_CELL_WALL_THICKENING	GO:0052482 defense response by cell wall thickening, GOslim:biological_process	16	11	0.00378	0.1993
DEFENSE_RESPONSE_BY_CALLOSE_DEPOSITION_IN_CELL_WALL	GO:0052544 defense response by callose deposition in cell wall, GOslim:biological_process	16	11	0.00378	0.1993
REGULATION_OF_TRANSPORT	GO:0051049 regulation of transport, GOslim:biological_process	172	56	0.00406	0.2136
POSITIVE_REGULATION_OF_IMMUNE_RESPONSE	GO:0050778 positive regulation of immune response, GOslim:biological_process	43	20	0.00411	0.2151
POSITIVE_REGULATION_OF_IMMUNE_SYSTEM_PROCESS	GO:0002684 positive regulation of immune system process, GOslim:biological_process	43	20	0.00411	0.2151
POSITIVE_REGULATION_OF_INNATE_IMMUNE_RESPONSE	GO:0045089 positive regulation of innate immune response, GOslim:biological_process	43	20	0.00411	0.2151
PHOTORESPIRATION	GO:0009853 photorespiration, GOslim:biological_process	161	53	0.00423	0.2211
ANTHOCYANIN-CONTAINING_COMPOUND_BIOSYNTHETIC_PROCESS	GO:0009718 anthocyanin-containing compound biosynthetic process, GOslim:biological_process	63	26	0.00425	0.2216
HEAT_ACCLIMATION	GO:0010286 heat acclimation, GOslim:biological_process	84	32	0.00439	0.2281
NEGATIVE_REGULATION_OF_GENE_EXPRESSION	GO:0010629 negative regulation of gene expression, GOslim:biological_process	592	159	0.00451	0.2339
POLYAMINE_METABOLIC_PROCESS	GO:0006595 polyamine metabolic process, GOslim:biological_process	60	25	0.00453	0.2348
TRANSCRIPTION,_DNA-DEPENDENT	GO:0006351 transcription, DNA-dependent, GOslim:biological_process	2616	619	0.00465	0.2405
CELLULAR_RESPONSE_TO_WATER_DEPRIVATION	GO:0042631 cellular response to water deprivation, GOslim:biological_process	67	27	0.00467	0.2411
CALLOSE_DEPOSITION_IN_CELL_WALL	GO:0052543 callose deposition in cell wall, GOslim:biological_process	47	21	0.00478	0.2459
MITOCHONDRION_LOCALIZATION	GO:0051646 mitochondrion localization, GOslim:biological_process	44	20	0.00501	0.2562
GOLGI_LOCALIZATION	GO:0051645 Golgi localization, GOslim:biological_process	44	20	0.00501	0.2562
RNA_BIOSYNTHETIC_PROCESS	GO:0032774 RNA biosynthetic process, GOslim:biological_process	2619	619	0.00502	0.2562
PEROXISOME_LOCALIZATION	GO:0060151 peroxisome localization, GOslim:biological_process	44	20	0.00501	0.2562
BIOLOGICAL_ADHESION	GO:0022610 biological adhesion, GOslim:biological_process	96	35	0.00522	0.2655
CELL_ADHESION	GO:0007155 cell adhesion, GOslim:biological_process	96	35	0.00522	0.2655
RESPONSE_TO_SYMBIOTIC_FUNGUS	GO:0009610 response to symbiotic fungus, GOslim:biological_process	38	18	0.00545	0.2766
POSITIVE_REGULATION_OF_METABOLIC_PROCESS	GO:0009893 positive regulation of metabolic process, GOslim:biological_process	617	164	0.0055	0.2783
POSITIVE_REGULATION_OF_CELLULAR_METABOLIC_PROCESS	GO:0031325 positive regulation of cellular metabolic process, GOslim:biological_process	609	162	0.00562	0.2842
RESPONSE_TO_UV-B	GO:0010224 response to UV-B, GOslim:biological_process	104	37	0.00573	0.2889
VACUOLE_ORGANIZATION	GO:0007033 vacuole organization, GOslim:biological_process	55	23	0.0061	0.3069
ANTHOCYANIN-CONTAINING_COMPOUND_METABOLIC_PROCESS	GO:0046283 anthocyanin-containing compound metabolic process, GOslim:biological_process	87	32	0.00662	0.3325
CELLULAR_METABOLIC_COMPOUND_SALVAGE	GO:0043094 cellular metabolic compound salvage, GOslim:biological_process	185	58	0.00667	0.3345
INDOLE-CONTAINING_COMPOUND_BIOSYNTHETIC_PROCESS	GO:0042435 indole-containing compound biosynthetic process, GOslim:biological_process	139	46	0.00676	0.3381
NEGATIVE_REGULATION_OF_MACROMOLECULE_METABOLIC_PROCESS	GO:0010605 negative regulation of macromolecule metabolic process, GOslim:biological_process	617	163	0.00677	0.3381
RESPONSE_TO_OZONE	GO:0010193 response to ozone, GOslim:biological_process	36	17	0.00697	0.3473
ACTIN_NUCLEATION	GO:0045010 actin nucleation, GOslim:biological_process	102	36	0.00702	0.3491
REGULATION_OF_ION_TRANSPORT	GO:0043269 regulation of ion transport, GOslim:biological_process	147	48	0.00704	0.3492
RIBONUCLEOTIDE_BIOSYNTHETIC_PROCESS	GO:0009260 ribonucleotide biosynthetic process, GOslim:biological_process	229	69	0.0071	0.3515
REGULATION_OF_ABSCISIC_ACID_MEDIATED_SIGNALING_PATHWAY	GO:0009787 regulation of abscisic acid mediated signaling pathway, GOslim:biological_process	53	22	0.00771	0.3809
CATION_HOMEOSTASIS	GO:0055080 cation homeostasis, GOslim:biological_process	215	65	0.00825	0.407
CALCIUM_ION_TRANSMEMBRANE_TRANSPORT	GO:0070588 calcium ion transmembrane transport, GOslim:biological_process	13	9	0.00833	0.4101
CELL_DIVISION	GO:0051301 cell division, GOslim:biological_process	362	101	0.00885	0.4349
RESPONSE_TO_ABSENCE_OF_LIGHT	GO:0009646 response to absence of light, GOslim:biological_process	34	16	0.00893	0.437
CELL_SURFACE_RECEPTOR_SIGNALING_PATHWAY	GO:0007166 cell surface receptor signaling pathway, GOslim:biological_process	161	51	0.00893	0.437
NEGATIVE_REGULATION_OF_METABOLIC_PROCESS	GO:0009892 negative regulation of metabolic process, GOslim:biological_process	640	167	0.00898	0.4389
POTASSIUM_ION_TRANSPORT	GO:0006813 potassium ion transport, GOslim:biological_process	54	22	0.00909	0.4435
POSITIVE_REGULATION_OF_BIOSYNTHETIC_PROCESS	GO:0009891 positive regulation of biosynthetic process, GOslim:biological_process	595	156	0.00982	0.4771
POSITIVE_REGULATION_OF_CELLULAR_BIOSYNTHETIC_PROCESS	GO:0031328 positive regulation of cellular biosynthetic process, GOslim:biological_process	595	156	0.00982	0.4771
CELLULAR_HORMONE_METABOLIC_PROCESS	GO:0034754 cellular hormone metabolic process, GOslim:biological_process	170	53	0.00998	0.4836
HOMEOSTATIC_PROCESS	GO:0042592 homeostatic process, GOslim:biological_process	481	129	0.01	0.4845
MICROTUBULE_CYTOSKELETON_ORGANIZATION	GO:0000226 microtubule cytoskeleton organization, GOslim:biological_process	246	72	0.0104	0.5022
ISOCITRATE_METABOLIC_PROCESS	GO:0006102 isocitrate metabolic process, GOslim:biological_process	11	8	0.0104	0.5022
OXIDATION-REDUCTION_PROCESS	GO:0055114 oxidation-reduction process, GOslim:biological_process	1368	333	0.0105	0.5038
PURINE_RIBONUCLEOTIDE_BIOSYNTHETIC_PROCESS	GO:0009152 purine ribonucleotide biosynthetic process, GOslim:biological_process	95	33	0.0114	0.5478
PHOSPHATE_ION_HOMEOSTASIS	GO:0055062 phosphate ion homeostasis, GOslim:biological_process	14	9	0.0116	0.5536
REACTIVE_OXYGEN_SPECIES_METABOLIC_PROCESS	GO:0072593 reactive oxygen species metabolic process, GOslim:biological_process	14	9	0.0116	0.5536
PHOSPHOLIPID_TRANSPORT	GO:0015914 phospholipid transport, GOslim:biological_process	14	9	0.0116	0.5536
CELLULAR_DI-,_TRI-VALENT_INORGANIC_CATION_HOMEOSTASIS	GO:0030005 cellular di-, tri-valent inorganic cation homeostasis, GOslim:biological_process	70	26	0.0122	0.5814
ANION_HOMEOSTASIS	GO:0055081 anion homeostasis, GOslim:biological_process	17	10	0.0122	0.5814
POSITIVE_GRAVITROPISM	GO:0009958 positive gravitropism, GOslim:biological_process	26	13	0.0122	0.5814
INDOLE-CONTAINING_COMPOUND_CATABOLIC_PROCESS	GO:0042436 indole-containing compound catabolic process, GOslim:biological_process	81	29	0.0124	0.5895
PROTEIN_LOCALIZATION_TO_NUCLEUS	GO:0034504 protein localization to nucleus, GOslim:biological_process	158	49	0.0138	0.6519
REGULATION_OF_SEED_GERMINATION	GO:0010029 regulation of seed germination, GOslim:biological_process	64	24	0.0143	0.676
PHYTOALEXIN_METABOLIC_PROCESS	GO:0052314 phytoalexin metabolic process, GOslim:biological_process	12	8	0.0148	0.6859
RNA_SPLICING,_VIA_ENDONUCLEOLYTIC_CLEAVAGE_AND_LIGATION	GO:0000394 RNA splicing, via endonucleolytic cleavage and ligation, GOslim:biological_process	143	45	0.0146	0.6859
INDOLE_PHYTOALEXIN_METABOLIC_PROCESS	GO:0046217 indole phytoalexin metabolic process, GOslim:biological_process	12	8	0.0148	0.6859
INDOLE_PHYTOALEXIN_BIOSYNTHETIC_PROCESS	GO:0009700 indole phytoalexin biosynthetic process, GOslim:biological_process	12	8	0.0148	0.6859
INDOLE_METABOLIC_PROCESS	GO:0042431 indole metabolic process, GOslim:biological_process	12	8	0.0148	0.6859
PHYTOALEXIN_BIOSYNTHETIC_PROCESS	GO:0052315 phytoalexin biosynthetic process, GOslim:biological_process	12	8	0.0148	0.6859
AROMATIC_AMINO_ACID_FAMILY_CATABOLIC_PROCESS	GO:0009074 aromatic amino acid family catabolic process, GOslim:biological_process	86	30	0.0147	0.6859
ACTIN_FILAMENT-BASED_PROCESS	GO:0030029 actin filament-based process, GOslim:biological_process	259	74	0.0147	0.6859
INTRA-GOLGI_VESICLE-MEDIATED_TRANSPORT	GO:0006891 intra-Golgi vesicle-mediated transport, GOslim:biological_process	68	25	0.0152	0.7035
ROOT_HAIR_CELL_DEVELOPMENT	GO:0080147 root hair cell development, GOslim:biological_process	15	9	0.0157	0.7208
NEGATIVE_REGULATION_OF_SIGNAL_TRANSDUCTION	GO:0009968 negative regulation of signal transduction, GOslim:biological_process	54	21	0.0157	0.7208
NEGATIVE_REGULATION_OF_SIGNALING	GO:0023057 negative regulation of signaling, GOslim:biological_process	54	21	0.0157	0.7208
DI-,_TRI-VALENT_INORGANIC_ANION_HOMEOSTASIS	GO:0055061 di-, tri-valent inorganic anion homeostasis, GOslim:biological_process	15	9	0.0157	0.7208
ACETYL-COA_BIOSYNTHETIC_PROCESS	GO:0006085 acetyl-CoA biosynthetic process, GOslim:biological_process	15	9	0.0157	0.7208
NEGATIVE_REGULATION_OF_CELL_COMMUNICATION	GO:0010648 negative regulation of cell communication, GOslim:biological_process	54	21	0.0157	0.7208
NUCLEOTIDE-SUGAR_TRANSPORT	GO:0015780 nucleotide-sugar transport, GOslim:biological_process	15	9	0.0157	0.7208
PROTEIN_IMPORT_INTO_NUCLEUS	GO:0006606 protein import into nucleus, GOslim:biological_process	156	48	0.0163	0.745
ACTIN_FILAMENT_ORGANIZATION	GO:0007015 actin filament organization, GOslim:biological_process	156	48	0.0163	0.745
RESPONSE_TO_HIGH_LIGHT_INTENSITY	GO:0009644 response to high light intensity, GOslim:biological_process	224	65	0.0164	0.7479
PURINE_NUCLEOTIDE_BIOSYNTHETIC_PROCESS	GO:0006164 purine nucleotide biosynthetic process, GOslim:biological_process	125	40	0.0166	0.7548
STOMATAL_MOVEMENT	GO:0010118 stomatal movement, GOslim:biological_process	73	26	0.0181	0.8225
VERY_LONG-CHAIN_FATTY_ACID_BIOSYNTHETIC_PROCESS	GO:0042761 very long-chain fatty acid biosynthetic process, GOslim:biological_process	10	7	0.0187	0.8467
SUBERIN_BIOSYNTHETIC_PROCESS	GO:0010345 suberin biosynthetic process, GOslim:biological_process	10	7	0.0187	0.8467
NUCLEAR_IMPORT	GO:0051170 nuclear import, GOslim:biological_process	158	48	0.0194	0.8742
PROTEIN_FOLDING	GO:0006457 protein folding, GOslim:biological_process	338	92	0.0196	0.8816
DEVELOPMENTAL_GROWTH_INVOLVED_IN_MORPHOGENESIS	GO:0060560 developmental growth involved in morphogenesis, GOslim:biological_process	499	130	0.0198	0.8892
UNIDIMENSIONAL_CELL_GROWTH	GO:0009826 unidimensional cell growth, GOslim:biological_process	499	130	0.0198	0.8892
RESPONSE_TO_CYTOKININ_STIMULUS	GO:0009735 response to cytokinin stimulus, GOslim:biological_process	127	40	0.0201	0.9001
XYLOGLUCAN_METABOLIC_PROCESS	GO:0010411 xyloglucan metabolic process, GOslim:biological_process	13	8	0.0203	0.9064
POSITIVE_REGULATION_OF_CELLULAR_COMPONENT_ORGANIZATION	GO:0051130 positive regulation of cellular component organization, GOslim:biological_process	63	23	0.0204	0.9131
DEFENSE_RESPONSE_TO_BACTERIUM,_INCOMPATIBLE_INTERACTION	GO:0009816 defense response to bacterium, incompatible interaction, GOslim:biological_process	35	15	0.0205	0.9138
LIGNAN_METABOLIC_PROCESS	GO:0009806 lignan metabolic process, GOslim:biological_process	16	9	0.0209	0.9186
REGULATION_OF_LOCALIZATION	GO:0032879 regulation of localization, GOslim:biological_process	207	60	0.0208	0.9186
MALATE_METABOLIC_PROCESS	GO:0006108 malate metabolic process, GOslim:biological_process	16	9	0.0209	0.9186
PHLOEM_OR_XYLEM_HISTOGENESIS	GO:0010087 phloem or xylem histogenesis, GOslim:biological_process	108	35	0.0207	0.9186
PECTIN_BIOSYNTHETIC_PROCESS	GO:0045489 pectin biosynthetic process, GOslim:biological_process	16	9	0.0209	0.9186
ROOT_HAIR_CELL_TIP_GROWTH	GO:0048768 root hair cell tip growth, GOslim:biological_process	16	9	0.0209	0.9186
LIGNAN_BIOSYNTHETIC_PROCESS	GO:0009807 lignan biosynthetic process, GOslim:biological_process	16	9	0.0209	0.9186
GLUCAN_METABOLIC_PROCESS	GO:0044042 glucan metabolic process, GOslim:biological_process	432	114	0.0209	0.9203
PURINE_RIBONUCLEOSIDE_TRIPHOSPHATE_BIOSYNTHETIC_PROCESS	GO:0009206 purine ribonucleoside triphosphate biosynthetic process, GOslim:biological_process	78	27	0.0213	0.9288
PURINE_NUCLEOSIDE_TRIPHOSPHATE_BIOSYNTHETIC_PROCESS	GO:0009145 purine nucleoside triphosphate biosynthetic process, GOslim:biological_process	78	27	0.0213	0.9288
RIBONUCLEOSIDE_TRIPHOSPHATE_BIOSYNTHETIC_PROCESS	GO:0009201 ribonucleoside triphosphate biosynthetic process, GOslim:biological_process	78	27	0.0213	0.9288
SPHINGOLIPID_BIOSYNTHETIC_PROCESS	GO:0030148 sphingolipid biosynthetic process, GOslim:biological_process	42	17	0.0212	0.9288
PHOTOMORPHOGENESIS	GO:0009640 photomorphogenesis, GOslim:biological_process	232	66	0.0216	0.9418
GALACTOSE_METABOLIC_PROCESS	GO:0006012 galactose metabolic process, GOslim:biological_process	32	14	0.0218	0.9492
METHIONINE_BIOSYNTHETIC_PROCESS	GO:0009086 methionine biosynthetic process, GOslim:biological_process	101	33	0.0222	0.9624
FATTY_ACID_BIOSYNTHETIC_PROCESS	GO:0006633 fatty acid biosynthetic process, GOslim:biological_process	303	83	0.0227	0.9837
REGULATION_OF_STOMATAL_MOVEMENT	GO:0010119 regulation of stomatal movement, GOslim:biological_process	39	16	0.0228	0.9848
ACTIN_CYTOSKELETON_ORGANIZATION	GO:0030036 actin cytoskeleton organization, GOslim:biological_process	184	54	0.0228	0.9848
RAS_PROTEIN_SIGNAL_TRANSDUCTION	GO:0007265 Ras protein signal transduction, GOslim:biological_process	46	18	0.023	0.9902
REGULATION_OF_SMALL_GTPASE_MEDIATED_SIGNAL_TRANSDUCTION	GO:0051056 regulation of small GTPase mediated signal transduction, GOslim:biological_process	46	18	0.023	0.9902
REGULATION_OF_RAS_PROTEIN_SIGNAL_TRANSDUCTION	GO:0046578 regulation of Ras protein signal transduction, GOslim:biological_process	46	18	0.023	0.9902
CELL_WALL_MACROMOLECULE_CATABOLIC_PROCESS	GO:0016998 cell wall macromolecule catabolic process, GOslim:biological_process	29	13	0.0231	0.9927
APOPTOTIC_NUCLEAR_CHANGES	GO:0030262 apoptotic nuclear changes, GOslim:biological_process	1	1	0.3186	1
RRNA_PROCESSING	GO:0006364 rRNA processing, GOslim:biological_process	323	16	1	1
NCRNA_CATABOLIC_PROCESS	GO:0034661 ncRNA catabolic process, GOslim:biological_process	6	2	0.4197	1
C-TERMINAL_PROTEIN_AMINO_ACID_MODIFICATION	GO:0018410 C-terminal protein amino acid modification, GOslim:biological_process	3	1	0.5357	1
MERISTEM_GROWTH	GO:0035266 meristem growth, GOslim:biological_process	173	36	0.563	1
PYRIDINE_NUCLEOTIDE_METABOLIC_PROCESS	GO:0019362 pyridine nucleotide metabolic process, GOslim:biological_process	214	30	0.9892	1
PEPTIDE_TRANSPORT	GO:0015833 peptide transport, GOslim:biological_process	116	34	0.0607	1
PEROXISOMAL_TRANSPORT	GO:0043574 peroxisomal transport, GOslim:biological_process	97	28	0.0925	1
SPHINGOID_CATABOLIC_PROCESS	GO:0046521 sphingoid catabolic process, GOslim:biological_process	8	6	0.0236	1
ATP-DEPENDENT_CHROMATIN_REMODELING	GO:0043044 ATP-dependent chromatin remodeling, GOslim:biological_process	2	2	0.143	1
CYTOSKELETON-DEPENDENT_INTRACELLULAR_TRANSPORT	GO:0030705 cytoskeleton-dependent intracellular transport, GOslim:biological_process	82	21	0.2506	1
LEAF_MORPHOGENESIS	GO:0009965 leaf morphogenesis, GOslim:biological_process	343	72	0.5423	1
DRUG_TRANSMEMBRANE_TRANSPORT	GO:0006855 drug transmembrane transport, GOslim:biological_process	72	22	0.0862	1
PURINE_RIBONUCLEOTIDE_METABOLIC_PROCESS	GO:0009150 purine ribonucleotide metabolic process, GOslim:biological_process	184	49	0.0895	1
AUXIN_POLAR_TRANSPORT	GO:0009926 auxin polar transport, GOslim:biological_process	95	27	0.1087	1
ACIDIC_AMINO_ACID_TRANSPORT	GO:0015800 acidic amino acid transport, GOslim:biological_process	5	2	0.3523	1
MODULATION_BY_SYMBIONT_OF_HOST_INNATE_IMMUNE_RESPONSE	GO:0052167 modulation by symbiont of host innate immune response, GOslim:biological_process	6	5	0.0295	1
RIBONUCLEOPROTEIN_COMPLEX_ASSEMBLY	GO:0022618 ribonucleoprotein complex assembly, GOslim:biological_process	19	3	0.7651	1
NICOTINAMIDE_NUCLEOTIDE_BIOSYNTHETIC_PROCESS	GO:0019359 nicotinamide nucleotide biosynthetic process, GOslim:biological_process	9	2	0.5967	1
MUCILAGE_METABOLIC_PROCESS	GO:0010191 mucilage metabolic process, GOslim:biological_process	11	3	0.4524	1
MICROTUBULE_POLYMERIZATION_OR_DEPOLYMERIZATION	GO:0031109 microtubule polymerization or depolymerization, GOslim:biological_process	10	2	0.6459	1
AROMATIC_AMINO_ACID_FAMILY_METABOLIC_PROCESS	GO:0009072 aromatic amino acid family metabolic process, GOslim:biological_process	245	61	0.1418	1
RESPONSE_TO_1-AMINOCYCLOPROPANE-1-CARBOXYLIC_ACID	GO:0009961 response to 1-aminocyclopropane-1-carboxylic acid, GOslim:biological_process	4	4	0.0358	1
PYRIMIDINE_RIBONUCLEOTIDE_BIOSYNTHETIC_PROCESS	GO:0009220 pyrimidine ribonucleotide biosynthetic process, GOslim:biological_process	140	38	0.1033	1
SEPAL_MORPHOGENESIS	GO:0048447 sepal morphogenesis, GOslim:biological_process	72	3	0.9999	1
CHROMATIN_ORGANIZATION	GO:0006325 chromatin organization, GOslim:biological_process	563	123	0.3848	1
REGULATION_OF_TRANSLATION	GO:0006417 regulation of translation, GOslim:biological_process	69	15	0.5057	1
XENOBIOTIC_METABOLIC_PROCESS	GO:0006805 xenobiotic metabolic process, GOslim:biological_process	9	3	0.3505	1
TRIPEPTIDE_TRANSPORT	GO:0042939 tripeptide transport, GOslim:biological_process	7	1	0.7844	1
NEGATIVE_REGULATION_OF_TRANSLATION,_NCRNA-MEDIATED	GO:0040033 negative regulation of translation, ncRNA-mediated, GOslim:biological_process	1	1	0.3186	1
CELLULAR_RESPONSE_TO_OSMOTIC_STRESS	GO:0071470 cellular response to osmotic stress, GOslim:biological_process	26	11	0.0464	1
GLUCOSE_CATABOLIC_PROCESS_TO_BUTANEDIOL	GO:0019650 glucose catabolic process to butanediol, GOslim:biological_process	5	1	0.6836	1
REGULATION_OF_EPIDERMAL_CELL_DIFFERENTIATION	GO:0045604 regulation of epidermal cell differentiation, GOslim:biological_process	6	1	0.7388	1
REGULATION_OF_GENERATION_OF_PRECURSOR_METABOLITES_AND_ENERGY	GO:0043467 regulation of generation of precursor metabolites and energy, GOslim:biological_process	20	2	0.9169	1
REGULATION_OF_CELLULAR_PROTEIN_METABOLIC_PROCESS	GO:0032268 regulation of cellular protein metabolic process, GOslim:biological_process	212	41	0.7242	1
CELLULAR_RESPONSE_TO_GIBBERELLIN_STIMULUS	GO:0071370 cellular response to gibberellin stimulus, GOslim:biological_process	83	14	0.8197	1
REGULATION_OF_HISTONE_METHYLATION	GO:0031060 regulation of histone methylation, GOslim:biological_process	4	2	0.2822	1
PROTEIN_TARGETING_TO_PLASMA_MEMBRANE	GO:0072661 protein targeting to plasma membrane, GOslim:biological_process	3	1	0.5357	1
CELL_CYCLE_PROCESS	GO:0022402 cell cycle process, GOslim:biological_process	586	143	0.0674	1
NEUTRAL_LIPID_BIOSYNTHETIC_PROCESS	GO:0046460 neutral lipid biosynthetic process, GOslim:biological_process	16	8	0.0451	1
CELLULAR_RESPONSE_TO_NUTRIENT	GO:0031670 cellular response to nutrient, GOslim:biological_process	1	1	0.3186	1
STOMATAL_COMPLEX_DEVELOPMENT	GO:0010374 stomatal complex development, GOslim:biological_process	216	38	0.8725	1
REGULATION_OF_STOMATAL_COMPLEX_PATTERNING	GO:2000037 regulation of stomatal complex patterning, GOslim:biological_process	6	4	0.0803	1
PEPTIDYL-TYROSINE_MODIFICATION	GO:0018212 peptidyl-tyrosine modification, GOslim:biological_process	1	1	0.3186	1
REGULATION_OF_ORGANELLE_ORGANIZATION	GO:0033043 regulation of organelle organization, GOslim:biological_process	175	42	0.2538	1
LIGNIN_BIOSYNTHETIC_PROCESS	GO:0009809 lignin biosynthetic process, GOslim:biological_process	48	13	0.2584	1
REPRODUCTIVE_STRUCTURE_DEVELOPMENT	GO:0048608 reproductive structure development, GOslim:biological_process	1700	374	0.2441	1
RIBONUCLEOSIDE_CATABOLIC_PROCESS	GO:0042454 ribonucleoside catabolic process, GOslim:biological_process	14	2	0.7963	1
ACTIN_FILAMENT_SEVERING	GO:0051014 actin filament severing, GOslim:biological_process	2	1	0.4375	1
HEXOSE_PHOSPHATE_TRANSPORT	GO:0015712 hexose phosphate transport, GOslim:biological_process	4	2	0.2822	1
PETAL_FORMATION	GO:0048451 petal formation, GOslim:biological_process	73	3	0.9999	1
REGULATION_OF_GTPASE_ACTIVITY	GO:0043087 regulation of GTPase activity, GOslim:biological_process	41	16	0.0315	1
RIBOSOMAL_LARGE_SUBUNIT_BIOGENESIS	GO:0042273 ribosomal large subunit biogenesis, GOslim:biological_process	1	1	0.3186	1
SIGNAL_COMPLEX_ASSEMBLY	GO:0007172 signal complex assembly, GOslim:biological_process	1	1	0.3186	1
REGULATION_OF_LIPID_METABOLIC_PROCESS	GO:0019216 regulation of lipid metabolic process, GOslim:biological_process	44	10	0.4734	1
REGULATION_OF_CELLULAR_AMINE_METABOLIC_PROCESS	GO:0033238 regulation of cellular amine metabolic process, GOslim:biological_process	9	2	0.5967	1
TERPENOID_CATABOLIC_PROCESS	GO:0016115 terpenoid catabolic process, GOslim:biological_process	11	3	0.4524	1
CELLULAR_RESPONSE_TO_BORON-CONTAINING_SUBSTANCE_LEVELS	GO:0080029 cellular response to boron-containing substance levels, GOslim:biological_process	3	1	0.5357	1
GLUCOSINOLATE_METABOLIC_PROCESS	GO:0019760 glucosinolate metabolic process, GOslim:biological_process	205	43	0.5449	1
NEGATIVE_REGULATION_OF_PROTEIN_KINASE_ACTIVITY	GO:0006469 negative regulation of protein kinase activity, GOslim:biological_process	43	8	0.6865	1
SHOOT_FORMATION	GO:0010346 shoot formation, GOslim:biological_process	14	3	0.5905	1
TYROSYL-TRNA_AMINOACYLATION	GO:0006437 tyrosyl-tRNA aminoacylation, GOslim:biological_process	3	2	0.2115	1
FLORAL_ORGAN_FORMATION	GO:0048449 floral organ formation, GOslim:biological_process	174	16	0.9999	1
STOMATAL_COMPLEX_MORPHOGENESIS	GO:0010103 stomatal complex morphogenesis, GOslim:biological_process	148	18	0.9934	1
POSITIVE_REGULATION_OF_POSTTRANSCRIPTIONAL_GENE_SILENCING	GO:0060148 positive regulation of posttranscriptional gene silencing, GOslim:biological_process	1	1	0.3186	1
RESPONSE_TO_OOMYCETES	GO:0002239 response to oomycetes, GOslim:biological_process	14	5	0.227	1
REGULATION_OF_RAB_GTPASE_ACTIVITY	GO:0032313 regulation of Rab GTPase activity, GOslim:biological_process	23	10	0.0498	1
PIGMENT_ACCUMULATION_IN_TISSUES_IN_RESPONSE_TO_UV_LIGHT	GO:0043479 pigment accumulation in tissues in response to UV light, GOslim:biological_process	113	33	0.0659	1
PEPTIDYL-ASPARAGINE_MODIFICATION	GO:0018196 peptidyl-asparagine modification, GOslim:biological_process	2	2	0.143	1
PHOTOPERIODISM,_FLOWERING	GO:0048573 photoperiodism, flowering, GOslim:biological_process	163	23	0.9771	1
REGULATION_OF_TRANSLATION,_NCRNA-MEDIATED	GO:0045974 regulation of translation, ncRNA-mediated, GOslim:biological_process	1	1	0.3186	1
GLYCOGEN_METABOLIC_PROCESS	GO:0005977 glycogen metabolic process, GOslim:biological_process	2	1	0.4375	1
GLYCOSYLCERAMIDE_CATABOLIC_PROCESS	GO:0046477 glycosylceramide catabolic process, GOslim:biological_process	8	6	0.0236	1
FARNESYL_DIPHOSPHATE_METABOLIC_PROCESS	GO:0045338 farnesyl diphosphate metabolic process, GOslim:biological_process	5	2	0.3523	1
POSTTRANSCRIPTIONAL_REGULATION_OF_GENE_EXPRESSION	GO:0010608 posttranscriptional regulation of gene expression, GOslim:biological_process	329	65	0.7117	1
PLANT-TYPE_CELL_WALL_MODIFICATION	GO:0009827 plant-type cell wall modification, GOslim:biological_process	222	35	0.9596	1
REGULATION_OF_PEPTIDYL-TYROSINE_PHOSPHORYLATION	GO:0050730 regulation of peptidyl-tyrosine phosphorylation, GOslim:biological_process	1	1	0.3186	1
4-HYDROXYPROLINE_METABOLIC_PROCESS	GO:0019471 4-hydroxyproline metabolic process, GOslim:biological_process	11	7	0.0261	1
PRIMARY_MERISTEM_TISSUE_DEVELOPMENT	GO:0010065 primary meristem tissue development, GOslim:biological_process	10	3	0.4021	1
FOLIC_ACID_METABOLIC_PROCESS	GO:0046655 folic acid metabolic process, GOslim:biological_process	38	14	0.0584	1
CENTROMERE_COMPLEX_ASSEMBLY	GO:0034508 centromere complex assembly, GOslim:biological_process	2	1	0.4375	1
AMINE_BIOSYNTHETIC_PROCESS	GO:0009309 amine biosynthetic process, GOslim:biological_process	524	116	0.3408	1
PHOSPHATIDYLINOSITOL-MEDIATED_SIGNALING	GO:0048015 phosphatidylinositol-mediated signaling, GOslim:biological_process	8	4	0.1424	1
SULFOLIPID_BIOSYNTHETIC_PROCESS	GO:0046506 sulfolipid biosynthetic process, GOslim:biological_process	2	2	0.143	1
RESPONSE_TO_XENOBIOTIC_STIMULUS	GO:0009410 response to xenobiotic stimulus, GOslim:biological_process	87	23	0.2004	1
REGULATION_OF_MAP_KINASE_ACTIVITY	GO:0043405 regulation of MAP kinase activity, GOslim:biological_process	16	5	0.2988	1
ETHANOLAMINE_BIOSYNTHETIC_PROCESS	GO:0046335 ethanolamine biosynthetic process, GOslim:biological_process	1	1	0.3186	1
ISOPENTENYL_DIPHOSPHATE_BIOSYNTHETIC_PROCESS	GO:0009240 isopentenyl diphosphate biosynthetic process, GOslim:biological_process	233	12	1	1
GLYCEROLIPID_BIOSYNTHETIC_PROCESS	GO:0045017 glycerolipid biosynthetic process, GOslim:biological_process	198	34	0.8893	1
LIPID_TRANSPORT	GO:0006869 lipid transport, GOslim:biological_process	182	52	0.0356	1
CELL-CELL_SIGNALING_INVOLVED_IN_CELL_FATE_COMMITMENT	GO:0045168 cell-cell signaling involved in cell fate commitment, GOslim:biological_process	7	1	0.7844	1
PIGMENT_ACCUMULATION_IN_RESPONSE_TO_UV_LIGHT	GO:0043478 pigment accumulation in response to UV light, GOslim:biological_process	113	33	0.0659	1
DIOL_METABOLIC_PROCESS	GO:0034311 diol metabolic process, GOslim:biological_process	6	1	0.7388	1
POSITIVE_REGULATION_OF_CIRCADIAN_RHYTHM	GO:0042753 positive regulation of circadian rhythm, GOslim:biological_process	6	1	0.7388	1
PLANT-TYPE_SPORE_DEVELOPMENT	GO:0048236 plant-type spore development, GOslim:biological_process	57	15	0.2667	1
NEGATIVE_REGULATION_OF_RAS_PROTEIN_SIGNAL_TRANSDUCTION	GO:0046580 negative regulation of Ras protein signal transduction, GOslim:biological_process	1	1	0.3186	1
SODIUM_ION_TRANSMEMBRANE_TRANSPORT	GO:0035725 sodium ion transmembrane transport, GOslim:biological_process	49	5	0.9701	1
XANTHINE_TRANSPORT	GO:0042906 xanthine transport, GOslim:biological_process	1	1	0.3186	1
PRODUCTION_OF_SIRNA_INVOLVED_IN_RNA_INTERFERENCE	GO:0030422 production of siRNA involved in RNA interference, GOslim:biological_process	140	27	0.6999	1
MULTICELLULAR_ORGANISM_GROWTH	GO:0035264 multicellular organism growth, GOslim:biological_process	4	1	0.6167	1
CIRCUMNUTATION	GO:0010031 circumnutation, GOslim:biological_process	5	1	0.6836	1
PROTEIN_O-LINKED_GLYCOSYLATION	GO:0006493 protein O-linked glycosylation, GOslim:biological_process	2	1	0.4375	1
LYSYL-TRNA_AMINOACYLATION	GO:0006430 lysyl-tRNA aminoacylation, GOslim:biological_process	3	1	0.5357	1
SNRNA_PSEUDOURIDINE_SYNTHESIS	GO:0031120 snRNA pseudouridine synthesis, GOslim:biological_process	3	1	0.5357	1
REGULATION_OF_AMINO_ACID_TRANSPORT	GO:0051955 regulation of amino acid transport, GOslim:biological_process	7	2	0.4834	1
RESPONSE_TO_COPPER_ION	GO:0046688 response to copper ion, GOslim:biological_process	14	4	0.3869	1
NITRATE_METABOLIC_PROCESS	GO:0042126 nitrate metabolic process, GOslim:biological_process	9	3	0.3505	1
CELLULAR_RESPONSE_TO_BORON-CONTAINING_SUBSTANCE_DEPRIVATION	GO:0080169 cellular response to boron-containing substance deprivation, GOslim:biological_process	1	1	0.3186	1
POSITIVE_REGULATION_OF_ABSCISIC_ACID_BIOSYNTHETIC_PROCESS	GO:0010116 positive regulation of abscisic acid biosynthetic process, GOslim:biological_process	2	1	0.4375	1
REGULATION_OF_PROTEIN_COMPLEX_ASSEMBLY	GO:0043254 regulation of protein complex assembly, GOslim:biological_process	19	3	0.7651	1
SOMATIC_EMBRYOGENESIS	GO:0010262 somatic embryogenesis, GOslim:biological_process	10	3	0.4021	1
GENE_SILENCING	GO:0016458 gene silencing, GOslim:biological_process	433	80	0.881	1
ADENOSINE_SALVAGE	GO:0006169 adenosine salvage, GOslim:biological_process	2	2	0.143	1
REGULATION_OF_UNIDIMENSIONAL_CELL_GROWTH	GO:0051510 regulation of unidimensional cell growth, GOslim:biological_process	96	29	0.061	1
PEPTIDYL-CYSTEINE_S-NITROSYLATION	GO:0018119 peptidyl-cysteine S-nitrosylation, GOslim:biological_process	16	3	0.669	1
POLYSACCHARIDE_TRANSPORT	GO:0015774 polysaccharide transport, GOslim:biological_process	1	1	0.3186	1
CELL_CYCLE_CHECKPOINT	GO:0000075 cell cycle checkpoint, GOslim:biological_process	10	3	0.4021	1
UDP-GALACTOSE_TRANSMEMBRANE_TRANSPORT	GO:0072334 UDP-galactose transmembrane transport, GOslim:biological_process	3	1	0.5357	1
CHLOROPHYLL_METABOLIC_PROCESS	GO:0015994 chlorophyll metabolic process, GOslim:biological_process	188	13	1	1
7-METHYLGUANOSINE_MRNA_CAPPING	GO:0006370 7-methylguanosine mRNA capping, GOslim:biological_process	5	2	0.3523	1
L-PHENYLALANINE_CATABOLIC_PROCESS	GO:0006559 L-phenylalanine catabolic process, GOslim:biological_process	7	3	0.2469	1
RNA_STABILIZATION	GO:0043489 RNA stabilization, GOslim:biological_process	6	1	0.7388	1
REGULATION_OF_IRON_ION_TRANSPORT	GO:0034756 regulation of iron ion transport, GOslim:biological_process	3	1	0.5357	1
VITAMIN_E_BIOSYNTHETIC_PROCESS	GO:0010189 vitamin E biosynthetic process, GOslim:biological_process	7	2	0.4834	1
NEGATIVE_REGULATION_OF_IMMUNE_SYSTEM_PROCESS	GO:0002683 negative regulation of immune system process, GOslim:biological_process	6	3	0.197	1
ACTIVATION_OF_PROTEIN_KINASE_ACTIVITY	GO:0032147 activation of protein kinase activity, GOslim:biological_process	10	6	0.0461	1
TRICHOBLAST_FATE_SPECIFICATION	GO:0010057 trichoblast fate specification, GOslim:biological_process	3	1	0.5357	1
L-SERINE_BIOSYNTHETIC_PROCESS	GO:0006564 L-serine biosynthetic process, GOslim:biological_process	7	5	0.0434	1
HISTONE_H3-K36_METHYLATION	GO:0010452 histone H3-K36 methylation, GOslim:biological_process	3	1	0.5357	1
SPINDLE_ASSEMBLY	GO:0051225 spindle assembly, GOslim:biological_process	45	9	0.6161	1
PURINE_NUCLEOSIDE_CATABOLIC_PROCESS	GO:0006152 purine nucleoside catabolic process, GOslim:biological_process	5	2	0.3523	1
POSITIVE_REGULATION_OF_AUTOPHAGY	GO:0010508 positive regulation of autophagy, GOslim:biological_process	2	1	0.4375	1
AXIS_SPECIFICATION	GO:0009798 axis specification, GOslim:biological_process	92	17	0.7326	1
REGULATION_OF_ACTIN_FILAMENT_LENGTH	GO:0030832 regulation of actin filament length, GOslim:biological_process	18	2	0.8872	1
NEGATIVE_REGULATION_OF_PHOSPHORYLATION	GO:0042326 negative regulation of phosphorylation, GOslim:biological_process	1	1	0.3186	1
MEIOTIC_MISMATCH_REPAIR	GO:0000710 meiotic mismatch repair, GOslim:biological_process	8	1	0.822	1
REGULATION_OF_STEROID_BIOSYNTHETIC_PROCESS	GO:0050810 regulation of steroid biosynthetic process, GOslim:biological_process	2	1	0.4375	1
CELLULAR_RESPONSE_TO_HIGH_LIGHT_INTENSITY	GO:0071486 cellular response to high light intensity, GOslim:biological_process	6	1	0.7388	1
LIGNIN_CATABOLIC_PROCESS	GO:0046274 lignin catabolic process, GOslim:biological_process	18	9	0.0345	1
TRIGLYCERIDE_BIOSYNTHETIC_PROCESS	GO:0019432 triglyceride biosynthetic process, GOslim:biological_process	13	7	0.0463	1
REGULATION_OF_BETA-GLUCAN_METABOLIC_PROCESS	GO:0032950 regulation of beta-glucan metabolic process, GOslim:biological_process	1	1	0.3186	1
ARABINOSE_METABOLIC_PROCESS	GO:0019566 arabinose metabolic process, GOslim:biological_process	8	3	0.2985	1
CELLULAR_RESPONSE_TO_MISFOLDED_PROTEIN	GO:0071218 cellular response to misfolded protein, GOslim:biological_process	6	4	0.0803	1
MALE_MEIOSIS	GO:0007140 male meiosis, GOslim:biological_process	21	2	0.9289	1
MAINTENANCE_OF_PROTEIN_LOCATION_IN_NUCLEUS	GO:0051457 maintenance of protein location in nucleus, GOslim:biological_process	2	1	0.4375	1
GDP-L-FUCOSE_METABOLIC_PROCESS	GO:0046368 GDP-L-fucose metabolic process, GOslim:biological_process	3	2	0.2115	1
DITERPENOID_METABOLIC_PROCESS	GO:0016101 diterpenoid metabolic process, GOslim:biological_process	62	8	0.9382	1
ENDONUCLEOLYTIC_CLEAVAGE_INVOLVED_IN_RRNA_PROCESSING	GO:0000478 endonucleolytic cleavage involved in rRNA processing, GOslim:biological_process	17	2	0.8689	1
PTERIDINE-CONTAINING_COMPOUND_METABOLIC_PROCESS	GO:0042558 pteridine-containing compound metabolic process, GOslim:biological_process	64	18	0.175	1
PHOTOPERIODISM	GO:0009648 photoperiodism, GOslim:biological_process	168	23	0.9843	1
SRP-DEPENDENT_COTRANSLATIONAL_PROTEIN_TARGETING_TO_MEMBRANE,_SIGNAL_SEQUENCE_RECOGNITION	GO:0006617 SRP-dependent cotranslational protein targeting to membrane, signal sequence recognition, GOslim:biological_process	4	1	0.6167	1
IRON_ION_TRANSMEMBRANE_TRANSPORT	GO:0034755 iron ion transmembrane transport, GOslim:biological_process	5	1	0.6836	1
DNA_DUPLEX_UNWINDING	GO:0032508 DNA duplex unwinding, GOslim:biological_process	13	2	0.7651	1
THREONINE_BIOSYNTHETIC_PROCESS	GO:0009088 threonine biosynthetic process, GOslim:biological_process	4	1	0.6167	1
GLYCOSYLCERAMIDE_METABOLIC_PROCESS	GO:0006677 glycosylceramide metabolic process, GOslim:biological_process	8	6	0.0236	1
RECOMBINATIONAL_REPAIR	GO:0000725 recombinational repair, GOslim:biological_process	67	4	0.9992	1
(1->3)-BETA-D-GLUCAN_METABOLIC_PROCESS	GO:0006074 (1->3)-beta-D-glucan metabolic process, GOslim:biological_process	13	6	0.0986	1
EPITHELIUM_DEVELOPMENT	GO:0060429 epithelium development, GOslim:biological_process	3	1	0.5357	1
CYTOKININ_METABOLIC_PROCESS	GO:0009690 cytokinin metabolic process, GOslim:biological_process	61	20	0.0624	1
MAINTENANCE_OF_PROTEIN_LOCATION	GO:0045185 maintenance of protein location, GOslim:biological_process	13	5	0.1932	1
PYRIMIDINE_RIBONUCLEOTIDE_SALVAGE	GO:0010138 pyrimidine ribonucleotide salvage, GOslim:biological_process	2	1	0.4375	1
NUCLEAR-TRANSCRIBED_MRNA_CATABOLIC_PROCESS	GO:0000956 nuclear-transcribed mRNA catabolic process, GOslim:biological_process	107	28	0.1838	1
MIRNA_METABOLIC_PROCESS	GO:0010586 miRNA metabolic process, GOslim:biological_process	6	1	0.7388	1
PHOSPHATIDYLINOSITOL_DEPHOSPHORYLATION	GO:0046856 phosphatidylinositol dephosphorylation, GOslim:biological_process	2	1	0.4375	1
RED_OR_FAR-RED_LIGHT_SIGNALING_PATHWAY	GO:0010017 red or far-red light signaling pathway, GOslim:biological_process	45	13	0.2015	1
REGULATION_OF_CELLULAR_CATABOLIC_PROCESS	GO:0031329 regulation of cellular catabolic process, GOslim:biological_process	12	7	0.0353	1
REGULATION_OF_PHOSPHOPROTEIN_PHOSPHATASE_ACTIVITY	GO:0043666 regulation of phosphoprotein phosphatase activity, GOslim:biological_process	2	1	0.4375	1
REGIONALIZATION	GO:0003002 regionalization, GOslim:biological_process	236	49	0.5703	1
REGULATION_OF_CHLOROPHYLL_CATABOLIC_PROCESS	GO:0010271 regulation of chlorophyll catabolic process, GOslim:biological_process	3	2	0.2115	1
COTYLEDON_DEVELOPMENT	GO:0048825 cotyledon development, GOslim:biological_process	77	26	0.0293	1
RECIPROCAL_MEIOTIC_RECOMBINATION	GO:0007131 reciprocal meiotic recombination, GOslim:biological_process	145	24	0.8906	1
ATTACHMENT_OF_SPINDLE_MICROTUBULES_TO_KINETOCHORE_INVOLVED_IN_MEIOTIC_CHROMOSOME_SEGREGATION	GO:0051316 attachment of spindle microtubules to kinetochore involved in meiotic chromosome segregation, GOslim:biological_process	2	1	0.4375	1
REGULATION_OF_LONG-DAY_PHOTOPERIODISM,_FLOWERING	GO:0048586 regulation of long-day photoperiodism, flowering, GOslim:biological_process	9	3	0.3505	1
CAMP-MEDIATED_SIGNALING	GO:0019933 cAMP-mediated signaling, GOslim:biological_process	4	2	0.2822	1
RESPONSE_TO_FAR_RED_LIGHT	GO:0010218 response to far red light, GOslim:biological_process	98	11	0.9888	1
CELLULAR_METAL_ION_HOMEOSTASIS	GO:0006875 cellular metal ion homeostasis, GOslim:biological_process	44	13	0.1839	1
FLAVONOL_BIOSYNTHETIC_PROCESS	GO:0051555 flavonol biosynthetic process, GOslim:biological_process	8	2	0.5425	1
GLYCOSPHINGOLIPID_CATABOLIC_PROCESS	GO:0046479 glycosphingolipid catabolic process, GOslim:biological_process	4	3	0.1071	1
VESICLE_COATING	GO:0006901 vesicle coating, GOslim:biological_process	14	4	0.3869	1
SPREAD_OF_VIRUS_IN_MULTICELLULAR_HOST	GO:0046739 spread of virus in multicellular host, GOslim:biological_process	8	1	0.822	1
REGULATION_OF_FATTY_ACID_OXIDATION	GO:0046320 regulation of fatty acid oxidation, GOslim:biological_process	2	1	0.4375	1
CELL_REDOX_HOMEOSTASIS	GO:0045454 cell redox homeostasis, GOslim:biological_process	136	35	0.1726	1
NEGATIVE_REGULATION_OF_TRANSLATION_INVOLVED_IN_GENE_SILENCING_BY_MIRNA	GO:0035278 negative regulation of translation involved in gene silencing by miRNA, GOslim:biological_process	1	1	0.3186	1
CHLOROPLAST_RNA_PROCESSING	GO:0031425 chloroplast RNA processing, GOslim:biological_process	13	1	0.9318	1
REGULATION_OF_VESICLE-MEDIATED_TRANSPORT	GO:0060627 regulation of vesicle-mediated transport, GOslim:biological_process	5	1	0.6836	1
CELL-MATRIX_ADHESION	GO:0007160 cell-matrix adhesion, GOslim:biological_process	2	1	0.4375	1
NUCLEAR-TRANSCRIBED_MRNA_POLY(A)_TAIL_SHORTENING	GO:0000289 nuclear-transcribed mRNA poly(A) tail shortening, GOslim:biological_process	3	2	0.2115	1
STEM_CELL_FATE_DETERMINATION	GO:0048867 stem cell fate determination, GOslim:biological_process	1	1	0.3186	1
REGULATION_OF_CELL_DIFFERENTIATION	GO:0045595 regulation of cell differentiation, GOslim:biological_process	130	32	0.2475	1
FEMALE_MEIOSIS	GO:0007143 female meiosis, GOslim:biological_process	6	1	0.7388	1
POSITIVE_REGULATION_OF_REACTIVE_OXYGEN_SPECIES_METABOLIC_PROCESS	GO:2000379 positive regulation of reactive oxygen species metabolic process, GOslim:biological_process	2	1	0.4375	1
CELL_FATE_DETERMINATION	GO:0001709 cell fate determination, GOslim:biological_process	6	1	0.7388	1
PETAL_DEVELOPMENT	GO:0048441 petal development, GOslim:biological_process	117	11	0.9986	1
FEMALE_GAMETE_GENERATION	GO:0007292 female gamete generation, GOslim:biological_process	141	30	0.5188	1
REGULATION_OF_MICROTUBULE-BASED_PROCESS	GO:0032886 regulation of microtubule-based process, GOslim:biological_process	7	1	0.7844	1
G-PROTEIN_COUPLED_RECEPTOR_SIGNALING_PATHWAY,_COUPLED_TO_S1P_SECOND_MESSENGER	GO:0001789 G-protein coupled receptor signaling pathway, coupled to S1P second messenger, GOslim:biological_process	1	1	0.3186	1
RHO_PROTEIN_SIGNAL_TRANSDUCTION	GO:0007266 Rho protein signal transduction, GOslim:biological_process	1	1	0.3186	1
LYSINE_BIOSYNTHETIC_PROCESS_VIA_DIAMINOPIMELATE	GO:0009089 lysine biosynthetic process via diaminopimelate, GOslim:biological_process	15	2	0.8238	1
GLYCOPROTEIN_CATABOLIC_PROCESS	GO:0006516 glycoprotein catabolic process, GOslim:biological_process	6	1	0.7388	1
RESPONSE_TO_IRON_ION	GO:0010039 response to iron ion, GOslim:biological_process	54	13	0.3849	1
NEGATIVE_GRAVITROPISM	GO:0009959 negative gravitropism, GOslim:biological_process	7	3	0.2469	1
UV_PROTECTION	GO:0009650 UV protection, GOslim:biological_process	4	2	0.2822	1
ESTABLISHMENT_OF_CELL_POLARITY	GO:0030010 establishment of cell polarity, GOslim:biological_process	3	2	0.2115	1
RNA_LOCALIZATION	GO:0006403 RNA localization, GOslim:biological_process	68	15	0.4856	1
GIBBERELLIC_ACID_MEDIATED_SIGNALING_PATHWAY	GO:0009740 gibberellic acid mediated signaling pathway, GOslim:biological_process	81	14	0.7951	1
PRIMARY_SHOOT_APICAL_MERISTEM_SPECIFICATION	GO:0010072 primary shoot apical meristem specification, GOslim:biological_process	44	15	0.079	1
VEGETATIVE_TO_REPRODUCTIVE_PHASE_TRANSITION_OF_MERISTEM	GO:0010228 vegetative to reproductive phase transition of meristem, GOslim:biological_process	450	108	0.1281	1
STEROID_HORMONE_MEDIATED_SIGNALING_PATHWAY	GO:0043401 steroid hormone mediated signaling pathway, GOslim:biological_process	37	15	0.029	1
ATP_CATABOLIC_PROCESS	GO:0006200 ATP catabolic process, GOslim:biological_process	55	10	0.7188	1
GLUCURONATE_METABOLIC_PROCESS	GO:0019585 glucuronate metabolic process, GOslim:biological_process	5	4	0.0557	1
REGULATION_OF_PROTEIN_DEPHOSPHORYLATION	GO:0035304 regulation of protein dephosphorylation, GOslim:biological_process	135	22	0.8957	1
GLYPHOSATE_METABOLIC_PROCESS	GO:0018920 glyphosate metabolic process, GOslim:biological_process	2	1	0.4375	1
LONGITUDINAL_AXIS_SPECIFICATION	GO:0009942 longitudinal axis specification, GOslim:biological_process	8	4	0.1424	1
POSTTRANSLATIONAL_PROTEIN_TARGETING_TO_MEMBRANE	GO:0006620 posttranslational protein targeting to membrane, GOslim:biological_process	1	1	0.3186	1
CYCLIC_NUCLEOTIDE_BIOSYNTHETIC_PROCESS	GO:0009190 cyclic nucleotide biosynthetic process, GOslim:biological_process	1	1	0.3186	1
NUCLEAR-TRANSCRIBED_MRNA_CATABOLIC_PROCESS,_DEADENYLATION-INDEPENDENT_DECAY	GO:0031086 nuclear-transcribed mRNA catabolic process, deadenylation-independent decay, GOslim:biological_process	5	4	0.0557	1
PIGMENT_METABOLIC_PROCESS	GO:0042440 pigment metabolic process, GOslim:biological_process	360	55	0.9918	1
BRASSINOSTEROID_HOMEOSTASIS	GO:0010268 brassinosteroid homeostasis, GOslim:biological_process	6	1	0.7388	1
DNA-DEPENDENT_TRANSCRIPTION,_ELONGATION	GO:0006354 DNA-dependent transcription, elongation, GOslim:biological_process	133	12	0.9995	1
CELLULOSE_MICROFIBRIL_ORGANIZATION	GO:0010215 cellulose microfibril organization, GOslim:biological_process	4	1	0.6167	1
RESPONSE_TO_STEROID_HORMONE_STIMULUS	GO:0048545 response to steroid hormone stimulus, GOslim:biological_process	37	15	0.029	1
ARF_PROTEIN_SIGNAL_TRANSDUCTION	GO:0032011 ARF protein signal transduction, GOslim:biological_process	22	7	0.2322	1
RESPONSE_TO_MANNITOL_STIMULUS	GO:0010555 response to mannitol stimulus, GOslim:biological_process	9	3	0.3505	1
NEGATIVE_REGULATION_OF_PEPTIDASE_ACTIVITY	GO:0010466 negative regulation of peptidase activity, GOslim:biological_process	10	2	0.6459	1
ALANYL-TRNA_AMINOACYLATION	GO:0006419 alanyl-tRNA aminoacylation, GOslim:biological_process	3	1	0.5357	1
SISTER_CHROMATID_COHESION	GO:0007062 sister chromatid cohesion, GOslim:biological_process	142	32	0.4022	1
TRYPTOPHAN_CATABOLIC_PROCESS	GO:0006569 tryptophan catabolic process, GOslim:biological_process	79	27	0.0239	1
CELL_WALL_DISASSEMBLY	GO:0044277 cell wall disassembly, GOslim:biological_process	15	7	0.0744	1
LIGNIN_METABOLIC_PROCESS	GO:0009808 lignin metabolic process, GOslim:biological_process	70	24	0.031	1
NUCLEOTIDE_CATABOLIC_PROCESS	GO:0009166 nucleotide catabolic process, GOslim:biological_process	96	20	0.562	1
REGULATION_OF_JASMONIC_ACID_MEDIATED_SIGNALING_PATHWAY	GO:2000022 regulation of jasmonic acid mediated signaling pathway, GOslim:biological_process	6	1	0.7388	1
REGULATION_OF_CELLULOSE_BIOSYNTHETIC_PROCESS	GO:2001006 regulation of cellulose biosynthetic process, GOslim:biological_process	2	1	0.4375	1
RESPONSE_TO_PH	GO:0009268 response to pH, GOslim:biological_process	3	2	0.2115	1
ESTABLISHMENT_OF_PLASTID_LOCALIZATION	GO:0051667 establishment of plastid localization, GOslim:biological_process	104	1	1	1
REGULATION_OF_FATTY_ACID_BIOSYNTHETIC_PROCESS	GO:0042304 regulation of fatty acid biosynthetic process, GOslim:biological_process	7	2	0.4834	1
NEGATIVE_REGULATION_OF_DEFENSE_RESPONSE_TO_VIRUS	GO:0050687 negative regulation of defense response to virus, GOslim:biological_process	1	1	0.3186	1
REGULATION_OF_CHROMOSOME_ORGANIZATION	GO:0033044 regulation of chromosome organization, GOslim:biological_process	129	34	0.1481	1
PEPTIDYL-PROLINE_HYDROXYLATION	GO:0019511 peptidyl-proline hydroxylation, GOslim:biological_process	11	7	0.0261	1
POLYPRENOL_BIOSYNTHETIC_PROCESS	GO:0016094 polyprenol biosynthetic process, GOslim:biological_process	18	9	0.0345	1
NEGATIVE_REGULATION_OF_DEVELOPMENTAL_PROCESS	GO:0051093 negative regulation of developmental process, GOslim:biological_process	148	33	0.4208	1
CELL_RECOGNITION	GO:0008037 cell recognition, GOslim:biological_process	39	12	0.1673	1
ROOT_MERISTEM_GROWTH	GO:0010449 root meristem growth, GOslim:biological_process	16	1	0.9617	1
PYRIMIDINE_RIBONUCLEOSIDE_TRIPHOSPHATE_METABOLIC_PROCESS	GO:0009208 pyrimidine ribonucleoside triphosphate metabolic process, GOslim:biological_process	6	2	0.4197	1
GMP_BIOSYNTHETIC_PROCESS	GO:0006177 GMP biosynthetic process, GOslim:biological_process	4	2	0.2822	1
STAMEN_DEVELOPMENT	GO:0048443 stamen development, GOslim:biological_process	174	43	0.2013	1
SPREAD_OF_VIRUS_IN_HOST,_CELL_TO_CELL	GO:0046740 spread of virus in host, cell to cell, GOslim:biological_process	3	1	0.5357	1
VITAMIN_TRANSPORT	GO:0051180 vitamin transport, GOslim:biological_process	3	1	0.5357	1
AMYLOPECTIN_BIOSYNTHETIC_PROCESS	GO:0010021 amylopectin biosynthetic process, GOslim:biological_process	6	1	0.7388	1
CHROMOSOME_SEGREGATION	GO:0007059 chromosome segregation, GOslim:biological_process	166	35	0.5348	1
CELLULAR_RESPONSE_TO_LIGHT_STIMULUS	GO:0071482 cellular response to light stimulus, GOslim:biological_process	77	20	0.2406	1
HEXOSE_MEDIATED_SIGNALING	GO:0009757 hexose mediated signaling, GOslim:biological_process	7	4	0.1094	1
SHORT-DAY_PHOTOPERIODISM	GO:0048572 short-day photoperiodism, GOslim:biological_process	8	1	0.822	1
ANATOMICAL_STRUCTURE_FORMATION_INVOLVED_IN_MORPHOGENESIS	GO:0048646 anatomical structure formation involved in morphogenesis, GOslim:biological_process	327	42	0.9995	1
CELL-CELL_JUNCTION_ASSEMBLY	GO:0007043 cell-cell junction assembly, GOslim:biological_process	5	4	0.0557	1
POSITIVE_REGULATION_OF_DNA_REPLICATION	GO:0045740 positive regulation of DNA replication, GOslim:biological_process	5	1	0.6836	1
CELL-CELL_JUNCTION_ORGANIZATION	GO:0045216 cell-cell junction organization, GOslim:biological_process	7	4	0.1094	1
DETECTION_OF_ABIOTIC_STIMULUS	GO:0009582 detection of abiotic stimulus, GOslim:biological_process	27	8	0.2579	1
POSITIVE_REGULATION_OF_CELL_COMMUNICATION	GO:0010647 positive regulation of cell communication, GOslim:biological_process	31	12	0.06	1
REGULATION_OF_RESPONSE_TO_NUTRIENT_LEVELS	GO:0032107 regulation of response to nutrient levels, GOslim:biological_process	4	3	0.1071	1
G-PROTEIN_COUPLED_RECEPTOR_SIGNALING_PATHWAY,_COUPLED_TO_CYCLIC_NUCLEOTIDE_SECOND_MESSENGER	GO:0007187 G-protein coupled receptor signaling pathway, coupled to cyclic nucleotide second messenger, GOslim:biological_process	4	2	0.2822	1
POLYSACCHARIDE_CATABOLIC_PROCESS	GO:0000272 polysaccharide catabolic process, GOslim:biological_process	54	13	0.3849	1
PURINE_NUCLEOTIDE_METABOLIC_PROCESS	GO:0006163 purine nucleotide metabolic process, GOslim:biological_process	217	57	0.0848	1
GUARD_CELL_DIFFERENTIATION	GO:0010052 guard cell differentiation, GOslim:biological_process	8	1	0.822	1
MEMBRANE_DOCKING	GO:0022406 membrane docking, GOslim:biological_process	36	12	0.1196	1
PRIMING_OF_CELLULAR_RESPONSE_TO_STRESS	GO:0080136 priming of cellular response to stress, GOslim:biological_process	2	2	0.143	1
GLYCEROL-3-PHOSPHATE_CATABOLIC_PROCESS	GO:0046168 glycerol-3-phosphate catabolic process, GOslim:biological_process	3	2	0.2115	1
CELLULAR_NITROGEN_COMPOUND_BIOSYNTHETIC_PROCESS	GO:0044271 cellular nitrogen compound biosynthetic process, GOslim:biological_process	800	175	0.3519	1
RIBONUCLEOTIDE_CATABOLIC_PROCESS	GO:0009261 ribonucleotide catabolic process, GOslim:biological_process	96	20	0.562	1
INDOLE_GLUCOSINOLATE_CATABOLIC_PROCESS	GO:0042344 indole glucosinolate catabolic process, GOslim:biological_process	3	3	0.0701	1
MUCILAGE_PECTIN_METABOLIC_PROCESS	GO:0048363 mucilage pectin metabolic process, GOslim:biological_process	2	1	0.4375	1
PROTEIN_ALKYLATION	GO:0008213 protein alkylation, GOslim:biological_process	302	60	0.6915	1
BLUE_LIGHT_SIGNALING_PATHWAY	GO:0009785 blue light signaling pathway, GOslim:biological_process	14	8	0.0271	1
NUCLEOBASE_CATABOLIC_PROCESS	GO:0046113 nucleobase catabolic process, GOslim:biological_process	4	3	0.1071	1
REGULATION_OF_TRICHOBLAST_FATE_SPECIFICATION	GO:0010061 regulation of trichoblast fate specification, GOslim:biological_process	3	1	0.5357	1
REGULATION_OF_CELLULAR_COMPONENT_ORGANIZATION	GO:0051128 regulation of cellular component organization, GOslim:biological_process	274	73	0.0472	1
PHENYLPROPANOID_CATABOLIC_PROCESS	GO:0046271 phenylpropanoid catabolic process, GOslim:biological_process	18	9	0.0345	1
GAS_TRANSPORT	GO:0015669 gas transport, GOslim:biological_process	4	2	0.2822	1
GLUTAMINE_FAMILY_AMINO_ACID_BIOSYNTHETIC_PROCESS	GO:0009084 glutamine family amino acid biosynthetic process, GOslim:biological_process	27	5	0.6789	1
TERMINATION_OF_G-PROTEIN_COUPLED_RECEPTOR_SIGNALING_PATHWAY	GO:0038032 termination of G-protein coupled receptor signaling pathway, GOslim:biological_process	3	1	0.5357	1
REGULATION_OF_SALICYLIC_ACID_MEDIATED_SIGNALING_PATHWAY	GO:2000031 regulation of salicylic acid mediated signaling pathway, GOslim:biological_process	5	1	0.6836	1
REGULATION_OF_STARCH_BIOSYNTHETIC_PROCESS	GO:0010581 regulation of starch biosynthetic process, GOslim:biological_process	3	2	0.2115	1
NUCLEAR_DIVISION	GO:0000280 nuclear division, GOslim:biological_process	105	24	0.4	1
RECEPTOR_METABOLIC_PROCESS	GO:0043112 receptor metabolic process, GOslim:biological_process	1	1	0.3186	1
CELLULAR_MACROMOLECULE_BIOSYNTHETIC_PROCESS	GO:0034645 cellular macromolecule biosynthetic process, GOslim:biological_process	5231	1144	0.1289	1
TETRAPYRROLE_CATABOLIC_PROCESS	GO:0033015 tetrapyrrole catabolic process, GOslim:biological_process	62	6	0.9857	1
NUCLEAR_EXPORT	GO:0051168 nuclear export, GOslim:biological_process	72	16	0.4718	1
REGULATION_OF_PHOSPHATE_METABOLIC_PROCESS	GO:0019220 regulation of phosphate metabolic process, GOslim:biological_process	231	52	0.3642	1
INACTIVATION_OF_MAPK_ACTIVITY	GO:0000188 inactivation of MAPK activity, GOslim:biological_process	3	1	0.5357	1
INTRASPECIES_INTERACTION_BETWEEN_ORGANISMS	GO:0051703 intraspecies interaction between organisms, GOslim:biological_process	2	1	0.4375	1
PHOTOTROPISM	GO:0009638 phototropism, GOslim:biological_process	13	5	0.1932	1
INOSITOL_TRISPHOSPHATE_METABOLIC_PROCESS	GO:0032957 inositol trisphosphate metabolic process, GOslim:biological_process	21	8	0.119	1
SEED_GERMINATION	GO:0009845 seed germination, GOslim:biological_process	225	64	0.0234	1
NEGATIVE_REGULATION_OF_ENDOPEPTIDASE_ACTIVITY	GO:0010951 negative regulation of endopeptidase activity, GOslim:biological_process	10	2	0.6459	1
CELL-SUBSTRATE_ADHESION	GO:0031589 cell-substrate adhesion, GOslim:biological_process	2	1	0.4375	1
MRNA_PROCESSING	GO:0006397 mRNA processing, GOslim:biological_process	177	28	0.9403	1
NEGATIVE_REGULATION_OF_CELL_CYCLE	GO:0045786 negative regulation of cell cycle, GOslim:biological_process	32	6	0.6721	1
POSITIVE_REGULATION_OF_G2/M_TRANSITION_OF_MITOTIC_CELL_CYCLE	GO:0010971 positive regulation of G2/M transition of mitotic cell cycle, GOslim:biological_process	4	2	0.2822	1
AMINE_CATABOLIC_PROCESS	GO:0009310 amine catabolic process, GOslim:biological_process	213	61	0.0238	1
PYRIMIDINE_NUCLEOSIDE_MONOPHOSPHATE_BIOSYNTHETIC_PROCESS	GO:0009130 pyrimidine nucleoside monophosphate biosynthetic process, GOslim:biological_process	8	4	0.1424	1
PROTEIN_ARGINYLATION	GO:0016598 protein arginylation, GOslim:biological_process	2	1	0.4375	1
CHLOROPLAST_AVOIDANCE_MOVEMENT	GO:0009903 chloroplast avoidance movement, GOslim:biological_process	8	1	0.822	1
REGULATION_OF_TWO-COMPONENT_SIGNAL_TRANSDUCTION_SYSTEM_(PHOSPHORELAY)	GO:0070297 regulation of two-component signal transduction system (phosphorelay), GOslim:biological_process	15	7	0.0744	1
SPINDLE_ASSEMBLY_CHECKPOINT	GO:0071173 spindle assembly checkpoint, GOslim:biological_process	4	1	0.6167	1
NEGATIVE_REGULATION_OF_CELLULAR_AMINO_ACID_METABOLIC_PROCESS	GO:0045763 negative regulation of cellular amino acid metabolic process, GOslim:biological_process	2	1	0.4375	1
MONOPOLAR_CELL_GROWTH	GO:0042814 monopolar cell growth, GOslim:biological_process	5	2	0.3523	1
COROLLA_DEVELOPMENT	GO:0048465 corolla development, GOslim:biological_process	117	11	0.9986	1
TRANSCRIPTION_FROM_RNA_POLYMERASE_II_PROMOTER	GO:0006366 transcription from RNA polymerase II promoter, GOslim:biological_process	85	23	0.1756	1
LEAF_DEVELOPMENT	GO:0048366 leaf development, GOslim:biological_process	446	116	0.0273	1
MONOVALENT_INORGANIC_CATION_TRANSPORT	GO:0015672 monovalent inorganic cation transport, GOslim:biological_process	245	49	0.6625	1
DOUBLE-STRAND_BREAK_REPAIR_VIA_NONHOMOLOGOUS_END_JOINING	GO:0006303 double-strand break repair via nonhomologous end joining, GOslim:biological_process	2	1	0.4375	1
POLYPRENOL_METABOLIC_PROCESS	GO:0016093 polyprenol metabolic process, GOslim:biological_process	21	9	0.0647	1
INOSITOL_PHOSPHATE_BIOSYNTHETIC_PROCESS	GO:0032958 inositol phosphate biosynthetic process, GOslim:biological_process	66	13	0.6381	1
UDP-L-ARABINOSE_METABOLIC_PROCESS	GO:0033356 UDP-L-arabinose metabolic process, GOslim:biological_process	4	2	0.2822	1
REGULATION_OF_CELL_MORPHOGENESIS	GO:0022604 regulation of cell morphogenesis, GOslim:biological_process	101	29	0.0919	1
CELLULAR_RESPONSE_TO_ABIOTIC_STIMULUS	GO:0071214 cellular response to abiotic stimulus, GOslim:biological_process	103	33	0.0271	1
MISFOLDED_OR_INCOMPLETELY_SYNTHESIZED_PROTEIN_CATABOLIC_PROCESS	GO:0006515 misfolded or incompletely synthesized protein catabolic process, GOslim:biological_process	11	5	0.1319	1
CYTOSOLIC_CALCIUM_ION_HOMEOSTASIS	GO:0051480 cytosolic calcium ion homeostasis, GOslim:biological_process	4	1	0.6167	1
REGULATION_OF_HOMEOSTATIC_PROCESS	GO:0032844 regulation of homeostatic process, GOslim:biological_process	54	7	0.9259	1
POSITIVE_REGULATION_OF_FATTY_ACID_BIOSYNTHETIC_PROCESS	GO:0045723 positive regulation of fatty acid biosynthetic process, GOslim:biological_process	3	1	0.5357	1
ALDEHYDE_CATABOLIC_PROCESS	GO:0046185 aldehyde catabolic process, GOslim:biological_process	100	20	0.6269	1
MERISTEM_INITIATION	GO:0010014 meristem initiation, GOslim:biological_process	165	46	0.0602	1
FLORAL_ORGAN_SENESCENCE	GO:0080187 floral organ senescence, GOslim:biological_process	2	1	0.4375	1
MOLYBDOPTERIN_COFACTOR_BIOSYNTHETIC_PROCESS	GO:0032324 molybdopterin cofactor biosynthetic process, GOslim:biological_process	11	3	0.4524	1
OXIDOREDUCTION_COENZYME_METABOLIC_PROCESS	GO:0006733 oxidoreduction coenzyme metabolic process, GOslim:biological_process	269	33	0.9994	1
MAINTENANCE_OF_MERISTEM_IDENTITY	GO:0010074 maintenance of meristem identity, GOslim:biological_process	56	12	0.5329	1
AMINO_SUGAR_METABOLIC_PROCESS	GO:0006040 amino sugar metabolic process, GOslim:biological_process	7	4	0.1094	1
POSTTRANSCRIPTIONAL_GENE_SILENCING	GO:0016441 posttranscriptional gene silencing, GOslim:biological_process	246	50	0.6242	1
NEGATIVE_REGULATION_OF_TRANSPORT	GO:0051051 negative regulation of transport, GOslim:biological_process	4	1	0.6167	1
REGULATION_OF_FATTY_ACID_BETA-OXIDATION	GO:0031998 regulation of fatty acid beta-oxidation, GOslim:biological_process	2	1	0.4375	1
VESICLE_DOCKING_INVOLVED_IN_EXOCYTOSIS	GO:0006904 vesicle docking involved in exocytosis, GOslim:biological_process	35	12	0.1057	1
SEED_DEVELOPMENT	GO:0048316 seed development, GOslim:biological_process	684	142	0.5934	1
THIAMINE_TRANSPORT	GO:0015888 thiamine transport, GOslim:biological_process	2	1	0.4375	1
DETECTION_OF_BACTERIUM	GO:0016045 detection of bacterium, GOslim:biological_process	16	6	0.1724	1
NEGATIVE_REGULATION_OF_PROTEIN_PHOSPHORYLATION	GO:0001933 negative regulation of protein phosphorylation, GOslim:biological_process	1	1	0.3186	1
CHLOROPHYLL_BIOSYNTHETIC_PROCESS	GO:0015995 chlorophyll biosynthetic process, GOslim:biological_process	124	7	1	1
MERISTEM_STRUCTURAL_ORGANIZATION	GO:0009933 meristem structural organization, GOslim:biological_process	254	70	0.0308	1
ESTABLISHMENT_OF_TISSUE_POLARITY	GO:0007164 establishment of tissue polarity, GOslim:biological_process	4	1	0.6167	1
MRNA_POLYADENYLATION	GO:0006378 mRNA polyadenylation, GOslim:biological_process	6	1	0.7388	1
DETERMINATION_OF_BILATERAL_SYMMETRY	GO:0009855 determination of bilateral symmetry, GOslim:biological_process	122	28	0.3796	1
POST-EMBRYONIC_ORGAN_DEVELOPMENT	GO:0048569 post-embryonic organ development, GOslim:biological_process	596	110	0.9166	1
NEGATIVE_REGULATION_OF_TRANSLATIONAL_INITIATION	GO:0045947 negative regulation of translational initiation, GOslim:biological_process	2	1	0.4375	1
ABAXIAL_CELL_FATE_SPECIFICATION	GO:0010158 abaxial cell fate specification, GOslim:biological_process	7	1	0.7844	1
REGULATION_OF_MITOTIC_CELL_CYCLE	GO:0007346 regulation of mitotic cell cycle, GOslim:biological_process	112	14	0.9817	1
REGULATION_OF_RNA_STABILITY	GO:0043487 regulation of RNA stability, GOslim:biological_process	6	1	0.7388	1
RESPONSE_TO_MANGANESE_ION	GO:0010042 response to manganese ion, GOslim:biological_process	3	2	0.2115	1
FRUIT_DEHISCENCE	GO:0010047 fruit dehiscence, GOslim:biological_process	10	2	0.6459	1
MITOSIS	GO:0007067 mitosis, GOslim:biological_process	67	13	0.6568	1
AMINOGLYCAN_CATABOLIC_PROCESS	GO:0006026 aminoglycan catabolic process, GOslim:biological_process	1	1	0.3186	1
CELLULAR_ION_HOMEOSTASIS	GO:0006873 cellular ion homeostasis, GOslim:biological_process	181	48	0.096	1
L-ALANINE_METABOLIC_PROCESS	GO:0042851 L-alanine metabolic process, GOslim:biological_process	1	1	0.3186	1
FOLIC_ACID-CONTAINING_COMPOUND_BIOSYNTHETIC_PROCESS	GO:0009396 folic acid-containing compound biosynthetic process, GOslim:biological_process	20	2	0.9169	1
PROTEIN_MATURATION	GO:0051604 protein maturation, GOslim:biological_process	79	16	0.6043	1
RHAMNOSE_METABOLIC_PROCESS	GO:0019299 rhamnose metabolic process, GOslim:biological_process	7	4	0.1094	1
SYMBIOSIS,_ENCOMPASSING_MUTUALISM_THROUGH_PARASITISM	GO:0044403 symbiosis, encompassing mutualism through parasitism, GOslim:biological_process	128	31	0.2771	1
ISOPRENOID_TRANSPORT	GO:0046864 isoprenoid transport, GOslim:biological_process	1	1	0.3186	1
REGULATION_OF_SALICYLIC_ACID_METABOLIC_PROCESS	GO:0010337 regulation of salicylic acid metabolic process, GOslim:biological_process	10	3	0.4021	1
CELLULAR_RESPONSE_TO_HEAT	GO:0034605 cellular response to heat, GOslim:biological_process	18	4	0.551	1
TRNA_METABOLIC_PROCESS	GO:0006399 tRNA metabolic process, GOslim:biological_process	158	22	0.9785	1
REGULATION_OF_NUCLEAR_DIVISION	GO:0051783 regulation of nuclear division, GOslim:biological_process	9	1	0.8531	1
MULTICELLULAR_ORGANISMAL_MOVEMENT	GO:0050879 multicellular organismal movement, GOslim:biological_process	5	1	0.6836	1
CELL_PROLIFERATION	GO:0008283 cell proliferation, GOslim:biological_process	264	58	0.4176	1
DETECTION_OF_GRAVITY	GO:0009590 detection of gravity, GOslim:biological_process	5	3	0.1499	1
POSITIVE_REGULATION_OF_GENE_EXPRESSION	GO:0010628 positive regulation of gene expression, GOslim:biological_process	468	81	0.9609	1
COENZYME_A_BIOSYNTHETIC_PROCESS	GO:0015937 coenzyme A biosynthetic process, GOslim:biological_process	9	1	0.8531	1
PHOSPHOGLYCERATE_TRANSPORT	GO:0015713 phosphoglycerate transport, GOslim:biological_process	6	4	0.0803	1
STEM_CELL_DEVELOPMENT	GO:0048864 stem cell development, GOslim:biological_process	66	14	0.5414	1
AUXIN_MEDIATED_SIGNALING_PATHWAY	GO:0009734 auxin mediated signaling pathway, GOslim:biological_process	63	22	0.0327	1
LACTOSE_CATABOLIC_PROCESS_VIA_UDP-GALACTOSE	GO:0019515 lactose catabolic process via UDP-galactose, GOslim:biological_process	12	4	0.3009	1
CLATHRIN-MEDIATED_ENDOCYTOSIS	GO:0072583 clathrin-mediated endocytosis, GOslim:biological_process	3	1	0.5357	1
MAINTENANCE_OF_PROTEIN_LOCALIZATION_IN_ENDOPLASMIC_RETICULUM	GO:0035437 maintenance of protein localization in endoplasmic reticulum, GOslim:biological_process	1	1	0.3186	1
PROTEIN_SUMOYLATION	GO:0016925 protein sumoylation, GOslim:biological_process	19	2	0.9031	1
POSITIVE_REGULATION_OF_ABSCISIC_ACID_MEDIATED_SIGNALING_PATHWAY	GO:0009789 positive regulation of abscisic acid mediated signaling pathway, GOslim:biological_process	18	8	0.0696	1
POLLEN-PISTIL_INTERACTION	GO:0009875 pollen-pistil interaction, GOslim:biological_process	44	14	0.123	1
MULTIDIMENSIONAL_CELL_GROWTH	GO:0009825 multidimensional cell growth, GOslim:biological_process	110	29	0.1702	1
RESPIRATORY_GASEOUS_EXCHANGE	GO:0007585 respiratory gaseous exchange, GOslim:biological_process	6	1	0.7388	1
ADENYLATE_CYCLASE-MODULATING_G-PROTEIN_COUPLED_RECEPTOR_SIGNALING_PATHWAY	GO:0007188 adenylate cyclase-modulating G-protein coupled receptor signaling pathway, GOslim:biological_process	4	2	0.2822	1
VITAMIN_E_METABOLIC_PROCESS	GO:0042360 vitamin E metabolic process, GOslim:biological_process	7	2	0.4834	1
POSITIVE_REGULATION_OF_CELLULAR_PROTEIN_METABOLIC_PROCESS	GO:0032270 positive regulation of cellular protein metabolic process, GOslim:biological_process	23	8	0.1601	1
GENE_SILENCING_BY_RNA	GO:0031047 gene silencing by RNA, GOslim:biological_process	354	62	0.9276	1
RESPONSE_TO_IONIZING_RADIATION	GO:0010212 response to ionizing radiation, GOslim:biological_process	93	16	0.8119	1
GAMETE_GENERATION	GO:0007276 gamete generation, GOslim:biological_process	189	37	0.6924	1
COFACTOR_TRANSPORT	GO:0051181 cofactor transport, GOslim:biological_process	13	2	0.7651	1
PENTOSE-PHOSPHATE_SHUNT	GO:0006098 pentose-phosphate shunt, GOslim:biological_process	200	28	0.9872	1
DNA_CATABOLIC_PROCESS,_ENDONUCLEOLYTIC	GO:0000737 DNA catabolic process, endonucleolytic, GOslim:biological_process	93	14	0.9106	1
THIAMINE_METABOLIC_PROCESS	GO:0006772 thiamine metabolic process, GOslim:biological_process	10	2	0.6459	1
UMP_SALVAGE	GO:0044206 UMP salvage, GOslim:biological_process	2	1	0.4375	1
POSITIVE_REGULATION_OF_RHO_GTPASE_ACTIVITY	GO:0032321 positive regulation of Rho GTPase activity, GOslim:biological_process	1	1	0.3186	1
CELLULAR_RESPONSE_TO_IRON_ION	GO:0071281 cellular response to iron ion, GOslim:biological_process	31	7	0.5035	1
ASPARTATE_TRANSAMIDATION	GO:0019465 aspartate transamidation, GOslim:biological_process	2	2	0.143	1
AMINOGLYCAN_METABOLIC_PROCESS	GO:0006022 aminoglycan metabolic process, GOslim:biological_process	1	1	0.3186	1
TERPENE_CATABOLIC_PROCESS	GO:0046247 terpene catabolic process, GOslim:biological_process	5	2	0.3523	1
PROTEIN_SECRETION	GO:0009306 protein secretion, GOslim:biological_process	22	9	0.0777	1
METHYLGLYOXAL_CATABOLIC_PROCESS	GO:0051596 methylglyoxal catabolic process, GOslim:biological_process	96	20	0.562	1
ARABINOSE_BIOSYNTHETIC_PROCESS	GO:0019567 arabinose biosynthetic process, GOslim:biological_process	1	1	0.3186	1
PEPTIDYL-PYROGLUTAMIC_ACID_BIOSYNTHETIC_PROCESS,_USING_GLUTAMINYL-PEPTIDE_CYCLOTRANSFERASE	GO:0017186 peptidyl-pyroglutamic acid biosynthetic process, using glutaminyl-peptide cyclotransferase, GOslim:biological_process	1	1	0.3186	1
GDP-FUCOSE_TRANSPORT	GO:0015783 GDP-fucose transport, GOslim:biological_process	2	1	0.4375	1
TYROSINE_BIOSYNTHETIC_PROCESS	GO:0006571 tyrosine biosynthetic process, GOslim:biological_process	5	2	0.3523	1
NUCLEOBASE_BIOSYNTHETIC_PROCESS	GO:0046112 nucleobase biosynthetic process, GOslim:biological_process	19	7	0.1544	1
REGULATION_OF_CELL_DEVELOPMENT	GO:0060284 regulation of cell development, GOslim:biological_process	16	2	0.8478	1
S-GLYCOSIDE_CATABOLIC_PROCESS	GO:0016145 S-glycoside catabolic process, GOslim:biological_process	14	6	0.121	1
REGULATION_OF_TRANSLATIONAL_INITIATION	GO:0006446 regulation of translational initiation, GOslim:biological_process	15	4	0.4295	1
ACTIVATION_OF_INNATE_IMMUNE_RESPONSE	GO:0002218 activation of innate immune response, GOslim:biological_process	34	14	0.0312	1
CELLULAR_DI-,_TRI-VALENT_INORGANIC_ANION_HOMEOSTASIS	GO:0030319 cellular di-, tri-valent inorganic anion homeostasis, GOslim:biological_process	4	3	0.1071	1
JASMONIC_ACID_AND_ETHYLENE-DEPENDENT_SYSTEMIC_RESISTANCE	GO:0009861 jasmonic acid and ethylene-dependent systemic resistance, GOslim:biological_process	12	4	0.3009	1
GLUTAMATE_CATABOLIC_PROCESS_TO_OXALOACETATE	GO:0019554 glutamate catabolic process to oxaloacetate, GOslim:biological_process	2	2	0.143	1
EMBRYO_SAC_DEVELOPMENT	GO:0009553 embryo sac development, GOslim:biological_process	242	49	0.6328	1
SESQUITERPENOID_METABOLIC_PROCESS	GO:0006714 sesquiterpenoid metabolic process, GOslim:biological_process	50	11	0.5048	1
PEPTIDYL-LYSINE_MODIFICATION	GO:0018205 peptidyl-lysine modification, GOslim:biological_process	6	3	0.197	1
L-ALANINE_CATABOLIC_PROCESS	GO:0042853 L-alanine catabolic process, GOslim:biological_process	1	1	0.3186	1
PURINE_RIBONUCLEOSIDE_MONOPHOSPHATE_METABOLIC_PROCESS	GO:0009167 purine ribonucleoside monophosphate metabolic process, GOslim:biological_process	16	6	0.1724	1
RHAMNOGALACTURONAN_II_BIOSYNTHETIC_PROCESS	GO:0010306 rhamnogalacturonan II biosynthetic process, GOslim:biological_process	5	3	0.1499	1
PHOSPHATIDYLSERINE_BIOSYNTHETIC_PROCESS	GO:0006659 phosphatidylserine biosynthetic process, GOslim:biological_process	2	2	0.143	1
ACTIN_FILAMENT_POLYMERIZATION	GO:0030041 actin filament polymerization, GOslim:biological_process	21	4	0.6573	1
GLYCEROL-3-PHOSPHATE_METABOLIC_PROCESS	GO:0006072 glycerol-3-phosphate metabolic process, GOslim:biological_process	5	3	0.1499	1
PEPTIDYL-GLUTAMINE_MODIFICATION	GO:0018199 peptidyl-glutamine modification, GOslim:biological_process	1	1	0.3186	1
HYPUSINE_METABOLIC_PROCESS	GO:0046516 hypusine metabolic process, GOslim:biological_process	4	3	0.1071	1
GLUTAMYL-TRNA_AMINOACYLATION	GO:0006424 glutamyl-tRNA aminoacylation, GOslim:biological_process	5	2	0.3523	1
CYTOPLASMIC_MRNA_PROCESSING_BODY_ASSEMBLY	GO:0033962 cytoplasmic mRNA processing body assembly, GOslim:biological_process	1	1	0.3186	1
NON-RECOMBINATIONAL_REPAIR	GO:0000726 non-recombinational repair, GOslim:biological_process	2	1	0.4375	1
REGULATION_OF_TRANSCRIPTION_FROM_RNA_POLYMERASE_II_PROMOTER_IN_RESPONSE_TO_SALT_STRESS	GO:0061416 regulation of transcription from RNA polymerase II promoter in response to salt stress, GOslim:biological_process	1	1	0.3186	1
PRIMARY_MIRNA_PROCESSING	GO:0031053 primary miRNA processing, GOslim:biological_process	4	1	0.6167	1
FLORAL_WHORL_DEVELOPMENT	GO:0048438 floral whorl development, GOslim:biological_process	505	90	0.9429	1
UMP_BIOSYNTHETIC_PROCESS	GO:0006222 UMP biosynthetic process, GOslim:biological_process	5	3	0.1499	1
FLOWER_DEVELOPMENT	GO:0009908 flower development, GOslim:biological_process	937	194	0.6182	1
POSITIVE_REGULATION_OF_RAS_GTPASE_ACTIVITY	GO:0032320 positive regulation of Ras GTPase activity, GOslim:biological_process	2	2	0.143	1
PYRIMIDINE_NUCLEOBASE_BIOSYNTHETIC_PROCESS	GO:0019856 pyrimidine nucleobase biosynthetic process, GOslim:biological_process	6	4	0.0803	1
PUTRESCINE_BIOSYNTHETIC_PROCESS	GO:0009446 putrescine biosynthetic process, GOslim:biological_process	3	2	0.2115	1
PURINE_NUCLEOSIDE_METABOLIC_PROCESS	GO:0042278 purine nucleoside metabolic process, GOslim:biological_process	31	9	0.2545	1
INTERSPECIES_INTERACTION_BETWEEN_ORGANISMS	GO:0044419 interspecies interaction between organisms, GOslim:biological_process	130	32	0.2475	1
REGULATION_OF_RADIAL_PATTERN_FORMATION	GO:0090213 regulation of radial pattern formation, GOslim:biological_process	2	2	0.143	1
STAMEN_MORPHOGENESIS	GO:0048448 stamen morphogenesis, GOslim:biological_process	8	1	0.822	1
MEDIUM-CHAIN_FATTY_ACID_METABOLIC_PROCESS	GO:0051791 medium-chain fatty acid metabolic process, GOslim:biological_process	2	1	0.4375	1
DEOXYRIBONUCLEOSIDE_MONOPHOSPHATE_METABOLIC_PROCESS	GO:0009162 deoxyribonucleoside monophosphate metabolic process, GOslim:biological_process	3	1	0.5357	1
CALCIUM_ION_HOMEOSTASIS	GO:0055074 calcium ion homeostasis, GOslim:biological_process	32	10	0.1856	1
DETECTION_OF_MOLECULE_OF_BACTERIAL_ORIGIN	GO:0032490 detection of molecule of bacterial origin, GOslim:biological_process	1	1	0.3186	1
ESTABLISHMENT_OF_RNA_LOCALIZATION	GO:0051236 establishment of RNA localization, GOslim:biological_process	68	15	0.4856	1
DNA_MODIFICATION	GO:0006304 DNA modification, GOslim:biological_process	183	22	0.9973	1
VITAMIN_K_METABOLIC_PROCESS	GO:0042373 vitamin K metabolic process, GOslim:biological_process	9	1	0.8531	1
DETECTION_OF_MOLECULE_OF_FUNGAL_ORIGIN	GO:0032491 detection of molecule of fungal origin, GOslim:biological_process	1	1	0.3186	1
REGULATION_OF_NITRIC_OXIDE_METABOLIC_PROCESS	GO:0080164 regulation of nitric oxide metabolic process, GOslim:biological_process	2	1	0.4375	1
MITOCHONDRIAL_FISSION	GO:0000266 mitochondrial fission, GOslim:biological_process	5	4	0.0557	1
PATHOGEN-ASSOCIATED_MOLECULAR_PATTERN_DEPENDENT_INDUCTION_BY_ORGANISM_OF_INNATE_IMMUNE_RESPONSE_OF_OTHER_ORGANISM_INVOLVED_IN_SYMBIOTIC_INTERACTION	GO:0052257 pathogen-associated molecular pattern dependent induction by organism of innate immune response of other organism involved in symbiotic interaction, GOslim:biological_process	6	5	0.0295	1
REGULATION_OF_NUCLEOCYTOPLASMIC_TRANSPORT	GO:0046822 regulation of nucleocytoplasmic transport, GOslim:biological_process	2	1	0.4375	1
L-METHIONINE_SALVAGE_FROM_METHYLTHIOADENOSINE	GO:0019509 L-methionine salvage from methylthioadenosine, GOslim:biological_process	5	1	0.6836	1
REGULATION_OF_PROTEIN_LOCALIZATION_TO_CELL_SURFACE	GO:2000008 regulation of protein localization to cell surface, GOslim:biological_process	5	1	0.6836	1
PURINE_NUCLEOTIDE_CATABOLIC_PROCESS	GO:0006195 purine nucleotide catabolic process, GOslim:biological_process	96	20	0.562	1
REGULATION_OF_POLYSACCHARIDE_METABOLIC_PROCESS	GO:0032881 regulation of polysaccharide metabolic process, GOslim:biological_process	4	3	0.1071	1
LACTOSE_CATABOLIC_PROCESS	GO:0005990 lactose catabolic process, GOslim:biological_process	15	7	0.0744	1
MYO-INOSITOL_HEXAKISPHOSPHATE_BIOSYNTHETIC_PROCESS	GO:0010264 myo-inositol hexakisphosphate biosynthetic process, GOslim:biological_process	65	13	0.6188	1
MEIOTIC_CHROMOSOME_SEGREGATION	GO:0045132 meiotic chromosome segregation, GOslim:biological_process	118	21	0.7979	1
DIPEPTIDE_TRANSPORT	GO:0042938 dipeptide transport, GOslim:biological_process	4	1	0.6167	1
PROTEIN_IMPORT_INTO_MITOCHONDRIAL_INNER_MEMBRANE	GO:0045039 protein import into mitochondrial inner membrane, GOslim:biological_process	7	1	0.7844	1
OVULE_DEVELOPMENT	GO:0048481 ovule development, GOslim:biological_process	158	24	0.9513	1
FLORAL_ORGAN_ABSCISSION	GO:0010227 floral organ abscission, GOslim:biological_process	34	10	0.2282	1
PROTEIN-CHROMOPHORE_LINKAGE	GO:0018298 protein-chromophore linkage, GOslim:biological_process	4	1	0.6167	1
REGULATION_OF_DEVELOPMENTAL_PROCESS	GO:0050793 regulation of developmental process, GOslim:biological_process	829	198	0.0649	1
DNA-DEPENDENT_DNA_REPLICATION	GO:0006261 DNA-dependent DNA replication, GOslim:biological_process	256	40	0.9723	1
DICARBOXYLIC_ACID_BIOSYNTHETIC_PROCESS	GO:0043650 dicarboxylic acid biosynthetic process, GOslim:biological_process	5	3	0.1499	1
NUCLEOTIDE-EXCISION_REPAIR,_DNA_INCISION	GO:0033683 nucleotide-excision repair, DNA incision, GOslim:biological_process	1	1	0.3186	1
REGULATION_OF_SEED_DORMANCY_PROCESS	GO:2000033 regulation of seed dormancy process, GOslim:biological_process	4	2	0.2822	1
ASSEMBLY_OF_ACTOMYOSIN_APPARATUS_INVOLVED_IN_CELL_CYCLE_CYTOKINESIS	GO:0000912 assembly of actomyosin apparatus involved in cell cycle cytokinesis, GOslim:biological_process	6	1	0.7388	1
THIAMINE_DIPHOSPHATE_BIOSYNTHETIC_PROCESS	GO:0009229 thiamine diphosphate biosynthetic process, GOslim:biological_process	2	1	0.4375	1
CELL_CYCLE	GO:0007049 cell cycle, GOslim:biological_process	802	196	0.0369	1
POSITIVE_REGULATION_OF_FLOWER_DEVELOPMENT	GO:0009911 positive regulation of flower development, GOslim:biological_process	37	6	0.7852	1
IMMUNE_RESPONSE-REGULATING_SIGNALING_PATHWAY	GO:0002764 immune response-regulating signaling pathway, GOslim:biological_process	2	1	0.4375	1
TETRAPYRROLE_BIOSYNTHETIC_PROCESS	GO:0033014 tetrapyrrole biosynthetic process, GOslim:biological_process	159	11	1	1
REGULATION_OF_GENE_EXPRESSION,_EPIGENETIC	GO:0040029 regulation of gene expression, epigenetic, GOslim:biological_process	491	90	0.9065	1
L-FUCOSE_BIOSYNTHETIC_PROCESS	GO:0006005 L-fucose biosynthetic process, GOslim:biological_process	4	2	0.2822	1
KETO-3-DEOXY-D-MANNO-OCTULOSONIC_ACID_METABOLIC_PROCESS	GO:0046400 keto-3-deoxy-D-manno-octulosonic acid metabolic process, GOslim:biological_process	3	2	0.2115	1
REGULATION_OF_SULFUR_METABOLIC_PROCESS	GO:0042762 regulation of sulfur metabolic process, GOslim:biological_process	15	6	0.1456	1
UDP-GLUCOSE_TRANSPORT	GO:0015786 UDP-glucose transport, GOslim:biological_process	3	2	0.2115	1
VERY_LONG-CHAIN_FATTY_ACID_METABOLIC_PROCESS	GO:0000038 very long-chain fatty acid metabolic process, GOslim:biological_process	55	19	0.0483	1
PIGMENT_CATABOLIC_PROCESS	GO:0046149 pigment catabolic process, GOslim:biological_process	58	6	0.9768	1
ENDOCYTIC_RECYCLING	GO:0032456 endocytic recycling, GOslim:biological_process	3	1	0.5357	1
L-METHIONINE_BIOSYNTHETIC_PROCESS	GO:0071265 L-methionine biosynthetic process, GOslim:biological_process	7	1	0.7844	1
MATURE_RIBOSOME_ASSEMBLY	GO:0042256 mature ribosome assembly, GOslim:biological_process	3	1	0.5357	1
REGULATION_OF_VIRAL_REPRODUCTION	GO:0050792 regulation of viral reproduction, GOslim:biological_process	2	1	0.4375	1
METHYLATION	GO:0032259 methylation, GOslim:biological_process	545	94	0.9729	1
AUTOPHAGY	GO:0006914 autophagy, GOslim:biological_process	74	17	0.4206	1
STEROID_ESTERIFICATION	GO:0034433 steroid esterification, GOslim:biological_process	2	1	0.4375	1
XYLOGLUCAN_BIOSYNTHETIC_PROCESS	GO:0009969 xyloglucan biosynthetic process, GOslim:biological_process	6	5	0.0295	1
FLORAL_ORGAN_DEVELOPMENT	GO:0048437 floral organ development, GOslim:biological_process	593	110	0.9085	1
ICOSANOID_METABOLIC_PROCESS	GO:0006690 icosanoid metabolic process, GOslim:biological_process	4	2	0.2822	1
7-METHYLGUANOSINE_RNA_CAPPING	GO:0009452 7-methylguanosine RNA capping, GOslim:biological_process	7	3	0.2469	1
REGULATION_OF_TELOMERE_MAINTENANCE	GO:0032204 regulation of telomere maintenance, GOslim:biological_process	54	7	0.9259	1
ASPARTATE_CATABOLIC_PROCESS	GO:0006533 aspartate catabolic process, GOslim:biological_process	2	2	0.143	1
TRANSMEMBRANE_RECEPTOR_PROTEIN_TYROSINE_KINASE_SIGNALING_PATHWAY	GO:0007169 transmembrane receptor protein tyrosine kinase signaling pathway, GOslim:biological_process	130	36	0.0928	1
GDP-L-FUCOSE_BIOSYNTHETIC_PROCESS	GO:0042350 GDP-L-fucose biosynthetic process, GOslim:biological_process	3	2	0.2115	1
REGULATION_OF_PROTEIN_POLYMERIZATION	GO:0032271 regulation of protein polymerization, GOslim:biological_process	19	3	0.7651	1
LONG-DAY_PHOTOPERIODISM	GO:0048571 long-day photoperiodism, GOslim:biological_process	25	9	0.1251	1
PROLINE_CATABOLIC_PROCESS	GO:0006562 proline catabolic process, GOslim:biological_process	3	1	0.5357	1
ARACHIDONIC_ACID_METABOLITE_PRODUCTION_INVOLVED_IN_INFLAMMATORY_RESPONSE	GO:0002538 arachidonic acid metabolite production involved in inflammatory response, GOslim:biological_process	1	1	0.3186	1
REGULATION_OF_ARF_PROTEIN_SIGNAL_TRANSDUCTION	GO:0032012 regulation of ARF protein signal transduction, GOslim:biological_process	22	7	0.2322	1
REGULATION_OF_CELL_GROWTH	GO:0001558 regulation of cell growth, GOslim:biological_process	110	30	0.1301	1
DETECTION_OF_EXTERNAL_STIMULUS	GO:0009581 detection of external stimulus, GOslim:biological_process	60	21	0.0357	1
COPPER_ION_TRANSMEMBRANE_TRANSPORT	GO:0035434 copper ion transmembrane transport, GOslim:biological_process	7	1	0.7844	1
FAT-SOLUBLE_VITAMIN_BIOSYNTHETIC_PROCESS	GO:0042362 fat-soluble vitamin biosynthetic process, GOslim:biological_process	16	3	0.669	1
TETRAPYRROLE_METABOLIC_PROCESS	GO:0033013 tetrapyrrole metabolic process, GOslim:biological_process	226	18	1	1
GLYCOSINOLATE_METABOLIC_PROCESS	GO:0019757 glycosinolate metabolic process, GOslim:biological_process	205	43	0.5449	1
ENDOSOMAL_TRANSPORT	GO:0016197 endosomal transport, GOslim:biological_process	34	13	0.055	1
NEGATIVE_REGULATION_OF_DNA_BINDING	GO:0043392 negative regulation of DNA binding, GOslim:biological_process	5	1	0.6836	1
FORMALDEHYDE_METABOLIC_PROCESS	GO:0046292 formaldehyde metabolic process, GOslim:biological_process	2	1	0.4375	1
METHYLAMMONIUM_TRANSPORT	GO:0015843 methylammonium transport, GOslim:biological_process	1	1	0.3186	1
MOVEMENT_IN_HOST	GO:0044000 movement in host, GOslim:biological_process	8	1	0.822	1
METALLO-SULFUR_CLUSTER_ASSEMBLY	GO:0031163 metallo-sulfur cluster assembly, GOslim:biological_process	101	4	1	1
ADENINE_TRANSPORT	GO:0015853 adenine transport, GOslim:biological_process	2	1	0.4375	1
ANAEROBIC_RESPIRATION	GO:0009061 anaerobic respiration, GOslim:biological_process	20	5	0.4481	1
CYCLIC_NUCLEOTIDE_METABOLIC_PROCESS	GO:0009187 cyclic nucleotide metabolic process, GOslim:biological_process	1	1	0.3186	1
RNA_SPLICING	GO:0008380 RNA splicing, GOslim:biological_process	300	68	0.3211	1
ACTIVATION_OF_MAPK_ACTIVITY	GO:0000187 activation of MAPK activity, GOslim:biological_process	1	1	0.3186	1
PHOSPHATIDYLGLYCEROL_BIOSYNTHETIC_PROCESS	GO:0006655 phosphatidylglycerol biosynthetic process, GOslim:biological_process	63	11	0.7656	1
ATTACHMENT_OF_SPINDLE_MICROTUBULES_TO_KINETOCHORE	GO:0008608 attachment of spindle microtubules to kinetochore, GOslim:biological_process	2	1	0.4375	1
DEFENSE_RESPONSE_SIGNALING_PATHWAY,_RESISTANCE_GENE-DEPENDENT	GO:0009870 defense response signaling pathway, resistance gene-dependent, GOslim:biological_process	15	7	0.0744	1
INFLORESCENCE_DEVELOPMENT	GO:0010229 inflorescence development, GOslim:biological_process	25	7	0.3201	1
RESPONSE_TO_VERY_LOW_LIGHT_INTENSITY_STIMULUS	GO:0055122 response to very low light intensity stimulus, GOslim:biological_process	2	1	0.4375	1
NEGATIVE_REGULATION_OF_NUCLEAR_DIVISION	GO:0051784 negative regulation of nuclear division, GOslim:biological_process	5	1	0.6836	1
MODIFICATION_OF_MORPHOLOGY_OR_PHYSIOLOGY_OF_OTHER_ORGANISM_INVOLVED_IN_SYMBIOTIC_INTERACTION	GO:0051817 modification of morphology or physiology of other organism involved in symbiotic interaction, GOslim:biological_process	110	27	0.2741	1
POSITIVE_REGULATION_OF_KINASE_ACTIVITY	GO:0033674 positive regulation of kinase activity, GOslim:biological_process	13	7	0.0463	1
MOVEMENT_IN_ENVIRONMENT_OF_OTHER_ORGANISM_INVOLVED_IN_SYMBIOTIC_INTERACTION	GO:0052192 movement in environment of other organism involved in symbiotic interaction, GOslim:biological_process	8	1	0.822	1
PROTEIN_COMPLEX_ASSEMBLY	GO:0006461 protein complex assembly, GOslim:biological_process	577	137	0.1186	1
NEGATIVE_REGULATION_OF_INNATE_IMMUNE_RESPONSE	GO:0045824 negative regulation of innate immune response, GOslim:biological_process	5	2	0.3523	1
REGULATION_OF_CELL_CYCLE_PROCESS	GO:0010564 regulation of cell cycle process, GOslim:biological_process	147	32	0.4709	1
PROTEIN_RETENTION_IN_ER_LUMEN	GO:0006621 protein retention in ER lumen, GOslim:biological_process	7	3	0.2469	1
POSITIVE_REGULATION_OF_PROGRAMMED_CELL_DEATH	GO:0043068 positive regulation of programmed cell death, GOslim:biological_process	11	4	0.2586	1
REGULATION_OF_ARF_GTPASE_ACTIVITY	GO:0032312 regulation of ARF GTPase activity, GOslim:biological_process	16	4	0.4713	1
RESPONSE_TO_GIBBERELLIN_STIMULUS	GO:0009739 response to gibberellin stimulus, GOslim:biological_process	165	38	0.344	1
REGULATION_OF_GLUCAN_BIOSYNTHETIC_PROCESS	GO:0010962 regulation of glucan biosynthetic process, GOslim:biological_process	4	3	0.1071	1
CGMP_BIOSYNTHETIC_PROCESS	GO:0006182 cGMP biosynthetic process, GOslim:biological_process	1	1	0.3186	1
SESQUITERPENE_BIOSYNTHETIC_PROCESS	GO:0051762 sesquiterpene biosynthetic process, GOslim:biological_process	41	6	0.8521	1
CELLULAR_RESPONSE_TO_STEROID_HORMONE_STIMULUS	GO:0071383 cellular response to steroid hormone stimulus, GOslim:biological_process	37	15	0.029	1
MRNA_TRANSPORT	GO:0051028 mRNA transport, GOslim:biological_process	61	14	0.4373	1
PHOTOSYSTEM_II_REPAIR	GO:0010206 photosystem II repair, GOslim:biological_process	10	1	0.8787	1
CELL_WALL_MODIFICATION_INVOLVED_IN_ABSCISSION	GO:0009830 cell wall modification involved in abscission, GOslim:biological_process	15	7	0.0744	1
PHOTOSYNTHETIC_ACCLIMATION	GO:0009643 photosynthetic acclimation, GOslim:biological_process	4	1	0.6167	1
NEGATIVE_REGULATION_OF_MITOSIS	GO:0045839 negative regulation of mitosis, GOslim:biological_process	5	1	0.6836	1
NUCLEOTIDE_SALVAGE	GO:0043173 nucleotide salvage, GOslim:biological_process	7	1	0.7844	1
REGULATION_OF_SEED_MATURATION	GO:2000034 regulation of seed maturation, GOslim:biological_process	3	1	0.5357	1
NUCLEOSIDE_METABOLIC_PROCESS	GO:0009116 nucleoside metabolic process, GOslim:biological_process	70	19	0.2005	1
DNA_METHYLATION	GO:0006306 DNA methylation, GOslim:biological_process	180	22	0.9965	1
DETECTION_OF_ENDOGENOUS_STIMULUS	GO:0009726 detection of endogenous stimulus, GOslim:biological_process	6	3	0.197	1
REGULATION_OF_GIBBERELLIC_ACID_MEDIATED_SIGNALING_PATHWAY	GO:0009937 regulation of gibberellic acid mediated signaling pathway, GOslim:biological_process	16	7	0.0915	1
COLD_ACCLIMATION	GO:0009631 cold acclimation, GOslim:biological_process	30	13	0.028	1
M_PHASE_OF_MITOTIC_CELL_CYCLE	GO:0000087 M phase of mitotic cell cycle, GOslim:biological_process	68	14	0.5814	1
CELL_JUNCTION_ORGANIZATION	GO:0034330 cell junction organization, GOslim:biological_process	8	4	0.1424	1
N-ACETYLGLUCOSAMINE_BIOSYNTHETIC_PROCESS	GO:0006045 N-acetylglucosamine biosynthetic process, GOslim:biological_process	3	2	0.2115	1
PROTON-TRANSPORTING_TWO-SECTOR_ATPASE_COMPLEX_ASSEMBLY	GO:0070071 proton-transporting two-sector ATPase complex assembly, GOslim:biological_process	5	3	0.1499	1
REGULATION_OF_CYTOPLASMIC_MRNA_PROCESSING_BODY_ASSEMBLY	GO:0010603 regulation of cytoplasmic mRNA processing body assembly, GOslim:biological_process	1	1	0.3186	1
RNA_TRANSPORT	GO:0050658 RNA transport, GOslim:biological_process	68	15	0.4856	1
MUCILAGE_BIOSYNTHETIC_PROCESS	GO:0010192 mucilage biosynthetic process, GOslim:biological_process	8	3	0.2985	1
PROTEIN_DEALKYLATION	GO:0008214 protein dealkylation, GOslim:biological_process	4	1	0.6167	1
GIBBERELLIN_MEDIATED_SIGNALING_PATHWAY	GO:0010476 gibberellin mediated signaling pathway, GOslim:biological_process	82	14	0.8077	1
DEVELOPMENTAL_PROCESS_INVOLVED_IN_REPRODUCTION	GO:0003006 developmental process involved in reproduction, GOslim:biological_process	2026	423	0.6042	1
PROTON_TRANSPORT	GO:0015992 proton transport, GOslim:biological_process	147	19	0.9876	1
NUCLEOSIDE_BIOSYNTHETIC_PROCESS	GO:0009163 nucleoside biosynthetic process, GOslim:biological_process	4	2	0.2822	1
CELLULAR_HOMEOSTASIS	GO:0019725 cellular homeostasis, GOslim:biological_process	324	85	0.045	1
RHYTHMIC_PROCESS	GO:0048511 rhythmic process, GOslim:biological_process	170	39	0.3492	1
MAINTENANCE_OF_LOCATION	GO:0051235 maintenance of location, GOslim:biological_process	18	8	0.0696	1
OXIDATIVE_PHOSPHORYLATION	GO:0006119 oxidative phosphorylation, GOslim:biological_process	72	12	0.8171	1
ROOT_CAP_DEVELOPMENT	GO:0048829 root cap development, GOslim:biological_process	14	4	0.3869	1
ANTIBIOTIC_TRANSPORT	GO:0042891 antibiotic transport, GOslim:biological_process	1	1	0.3186	1
ARGININE_CATABOLIC_PROCESS	GO:0006527 arginine catabolic process, GOslim:biological_process	6	1	0.7388	1
RESPONSE_TO_ARSENIC-CONTAINING_SUBSTANCE	GO:0046685 response to arsenic-containing substance, GOslim:biological_process	37	15	0.029	1
REPRODUCTION	GO:0000003 reproduction, GOslim:biological_process	2245	480	0.4156	1
OLIGOSACCHARIDE_METABOLIC_PROCESS	GO:0009311 oligosaccharide metabolic process, GOslim:biological_process	244	48	0.6996	1
PHOTOSYNTHESIS	GO:0015979 photosynthesis, GOslim:biological_process	436	21	1	1
NADP_BIOSYNTHETIC_PROCESS	GO:0006741 NADP biosynthetic process, GOslim:biological_process	2	1	0.4375	1
FLORAL_MERISTEM_DETERMINACY	GO:0010582 floral meristem determinacy, GOslim:biological_process	15	2	0.8238	1
POTASSIUM_ION_TRANSMEMBRANE_TRANSPORT	GO:0071805 potassium ion transmembrane transport, GOslim:biological_process	19	5	0.411	1
REGULATION_OF_ACTIN_NUCLEATION	GO:0051125 regulation of actin nucleation, GOslim:biological_process	4	1	0.6167	1
STAMEN_FORMATION	GO:0048455 stamen formation, GOslim:biological_process	5	1	0.6836	1
REGULATION_OF_FLOWER_DEVELOPMENT	GO:0009909 regulation of flower development, GOslim:biological_process	359	74	0.5987	1
LIPID_LOCALIZATION	GO:0010876 lipid localization, GOslim:biological_process	282	72	0.0874	1
TEMPERATURE_COMPENSATION_OF_THE_CIRCADIAN_CLOCK	GO:0010378 temperature compensation of the circadian clock, GOslim:biological_process	1	1	0.3186	1
NEGATIVE_REGULATION_OF_TWO-COMPONENT_SIGNAL_TRANSDUCTION_SYSTEM_(PHOSPHORELAY)	GO:0070298 negative regulation of two-component signal transduction system (phosphorelay), GOslim:biological_process	12	5	0.1614	1
N-ACETYLGLUCOSAMINE_METABOLIC_PROCESS	GO:0006044 N-acetylglucosamine metabolic process, GOslim:biological_process	6	3	0.197	1
REGULATION_OF_LIPID_BIOSYNTHETIC_PROCESS	GO:0046890 regulation of lipid biosynthetic process, GOslim:biological_process	20	6	0.2948	1
NCRNA_PROCESSING	GO:0034470 ncRNA processing, GOslim:biological_process	384	24	1	1
NEGATIVE_REGULATION_OF_CYCLIN-DEPENDENT_PROTEIN_KINASE_ACTIVITY	GO:0045736 negative regulation of cyclin-dependent protein kinase activity, GOslim:biological_process	27	4	0.8147	1
TRNA_WOBBLE_BASE_MODIFICATION	GO:0002097 tRNA wobble base modification, GOslim:biological_process	5	1	0.6836	1
CELLULAR_OLIGOSACCHARIDE_METABOLIC_PROCESS	GO:0051691 cellular oligosaccharide metabolic process, GOslim:biological_process	1	1	0.3186	1
RESPONSE_TO_ANOXIA	GO:0034059 response to anoxia, GOslim:biological_process	4	1	0.6167	1
SKOTOMORPHOGENESIS	GO:0009647 skotomorphogenesis, GOslim:biological_process	4	2	0.2822	1
LIPID_PARTICLE_ORGANIZATION	GO:0034389 lipid particle organization, GOslim:biological_process	2	1	0.4375	1
MRNA_EXPORT_FROM_NUCLEUS	GO:0006406 mRNA export from nucleus, GOslim:biological_process	61	14	0.4373	1
CHLOROPLAST-NUCLEUS_SIGNALING_PATHWAY	GO:0010019 chloroplast-nucleus signaling pathway, GOslim:biological_process	6	1	0.7388	1
PURINE_NUCLEOBASE_SALVAGE	GO:0043096 purine nucleobase salvage, GOslim:biological_process	6	1	0.7388	1
CELLULAR_RESPONSE_TO_XENOBIOTIC_STIMULUS	GO:0071466 cellular response to xenobiotic stimulus, GOslim:biological_process	9	3	0.3505	1
POLYAMINE_TRANSPORT	GO:0015846 polyamine transport, GOslim:biological_process	5	2	0.3523	1
SHOOT_MORPHOGENESIS	GO:0010016 shoot morphogenesis, GOslim:biological_process	523	104	0.7328	1
REGULATION_OF_RAS_GTPASE_ACTIVITY	GO:0032318 regulation of Ras GTPase activity, GOslim:biological_process	40	15	0.0463	1
PYRIMIDINE_NUCLEOSIDE_METABOLIC_PROCESS	GO:0006213 pyrimidine nucleoside metabolic process, GOslim:biological_process	23	5	0.5548	1
NUCLEAR-TRANSCRIBED_MRNA_CATABOLIC_PROCESS,_NONSENSE-MEDIATED_DECAY	GO:0000184 nuclear-transcribed mRNA catabolic process, nonsense-mediated decay, GOslim:biological_process	5	2	0.3523	1
PEPTIDYL-HISTIDINE_MODIFICATION	GO:0018202 peptidyl-histidine modification, GOslim:biological_process	12	4	0.3009	1
PHYTOL_METABOLIC_PROCESS	GO:0033306 phytol metabolic process, GOslim:biological_process	2	1	0.4375	1
PROTEIN_DEACETYLATION	GO:0006476 protein deacetylation, GOslim:biological_process	16	2	0.8478	1
PHOSPHORYLATED_CARBOHYDRATE_DEPHOSPHORYLATION	GO:0046838 phosphorylated carbohydrate dephosphorylation, GOslim:biological_process	23	8	0.1601	1
REGULATION_OF_SECONDARY_SHOOT_FORMATION	GO:2000032 regulation of secondary shoot formation, GOslim:biological_process	6	1	0.7388	1
SUPEROXIDE_METABOLIC_PROCESS	GO:0006801 superoxide metabolic process, GOslim:biological_process	14	2	0.7963	1
PHOSPHATIDYLINOSITOL_METABOLIC_PROCESS	GO:0046488 phosphatidylinositol metabolic process, GOslim:biological_process	114	16	0.957	1
PLANT-TYPE_CELL_WALL_CELLULOSE_METABOLIC_PROCESS	GO:0052541 plant-type cell wall cellulose metabolic process, GOslim:biological_process	24	11	0.0316	1
PEPTIDYL-DIPHTHAMIDE_BIOSYNTHETIC_PROCESS_FROM_PEPTIDYL-HISTIDINE	GO:0017183 peptidyl-diphthamide biosynthetic process from peptidyl-histidine, GOslim:biological_process	3	1	0.5357	1
POSITIVE_REGULATION_OF_ISOPRENOID_METABOLIC_PROCESS	GO:0045828 positive regulation of isoprenoid metabolic process, GOslim:biological_process	2	1	0.4375	1
POLAR_NUCLEUS_FUSION	GO:0010197 polar nucleus fusion, GOslim:biological_process	22	5	0.5202	1
HISTIDINE_METABOLIC_PROCESS	GO:0006547 histidine metabolic process, GOslim:biological_process	11	1	0.8999	1
ANTHER_DEHISCENCE	GO:0009901 anther dehiscence, GOslim:biological_process	14	3	0.5905	1
POLLEN_TUBE_GUIDANCE	GO:0010183 pollen tube guidance, GOslim:biological_process	17	3	0.7039	1
POLLEN_SPERM_CELL_DIFFERENTIATION	GO:0048235 pollen sperm cell differentiation, GOslim:biological_process	28	3	0.9259	1
MITOTIC_CELL_CYCLE_CHECKPOINT	GO:0007093 mitotic cell cycle checkpoint, GOslim:biological_process	7	2	0.4834	1
MODIFICATION_BY_SYMBIONT_OF_HOST_MORPHOLOGY_OR_PHYSIOLOGY	GO:0044003 modification by symbiont of host morphology or physiology, GOslim:biological_process	110	27	0.2741	1
ANTHER_DEVELOPMENT	GO:0048653 anther development, GOslim:biological_process	84	18	0.5199	1
NUCLEOTIDE_PHOSPHORYLATION	GO:0046939 nucleotide phosphorylation, GOslim:biological_process	16	4	0.4713	1
REGULATION_OF_PHOSPHORYLATION	GO:0042325 regulation of phosphorylation, GOslim:biological_process	95	30	0.0387	1
POSITIVE_REGULATION_OF_ORGAN_GROWTH	GO:0046622 positive regulation of organ growth, GOslim:biological_process	2	1	0.4375	1
CYTOKININ_CATABOLIC_PROCESS	GO:0009823 cytokinin catabolic process, GOslim:biological_process	7	2	0.4834	1
MACROMOLECULAR_COMPLEX_ASSEMBLY	GO:0065003 macromolecular complex assembly, GOslim:biological_process	665	159	0.0872	1
COFACTOR_CATABOLIC_PROCESS	GO:0051187 cofactor catabolic process, GOslim:biological_process	92	23	0.2692	1
THREONINE_CATABOLIC_PROCESS	GO:0006567 threonine catabolic process, GOslim:biological_process	12	3	0.5008	1
MANGANESE_ION_TRANSPORT	GO:0006828 manganese ion transport, GOslim:biological_process	9	4	0.1787	1
SULFATE_ASSIMILATION	GO:0000103 sulfate assimilation, GOslim:biological_process	15	5	0.2623	1
RESPONSE_TO_NICKEL_CATION	GO:0010045 response to nickel cation, GOslim:biological_process	2	1	0.4375	1
SELENIUM_COMPOUND_METABOLIC_PROCESS	GO:0001887 selenium compound metabolic process, GOslim:biological_process	4	1	0.6167	1
CELLULAR_RESPONSE_TO_SALT_STRESS	GO:0071472 cellular response to salt stress, GOslim:biological_process	19	7	0.1544	1
REGULATION_OF_FATTY_ACID_METABOLIC_PROCESS	GO:0019217 regulation of fatty acid metabolic process, GOslim:biological_process	10	3	0.4021	1
DEFENSE_RESPONSE_TO_OOMYCETES	GO:0002229 defense response to oomycetes, GOslim:biological_process	11	4	0.2586	1
CELL-CELL_ADHESION	GO:0016337 cell-cell adhesion, GOslim:biological_process	5	3	0.1499	1
IRON-SULFUR_CLUSTER_ASSEMBLY	GO:0016226 iron-sulfur cluster assembly, GOslim:biological_process	101	4	1	1
MO-MOLYBDOPTERIN_COFACTOR_BIOSYNTHETIC_PROCESS	GO:0006777 Mo-molybdopterin cofactor biosynthetic process, GOslim:biological_process	11	3	0.4524	1
TRANSLATION	GO:0006412 translation, GOslim:biological_process	1342	87	1	1
REGULATION_OF_BINDING	GO:0051098 regulation of binding, GOslim:biological_process	13	1	0.9318	1
REGULATION_OF_DEFENSE_RESPONSE_TO_VIRUS_BY_HOST	GO:0050691 regulation of defense response to virus by host, GOslim:biological_process	2	2	0.143	1
PROTEIN_REFOLDING	GO:0042026 protein refolding, GOslim:biological_process	9	3	0.3505	1
RIBOFLAVIN_BIOSYNTHETIC_PROCESS	GO:0009231 riboflavin biosynthetic process, GOslim:biological_process	10	1	0.8787	1
RESPONSE_TO_ATP	GO:0033198 response to ATP, GOslim:biological_process	1	1	0.3186	1
NEGATIVE_REGULATION_OF_LATERAL_ROOT_DEVELOPMENT	GO:1901332 negative regulation of lateral root development, GOslim:biological_process	1	1	0.3186	1
CELLULAR_RESPONSE_TO_HYDROGEN_PEROXIDE	GO:0070301 cellular response to hydrogen peroxide, GOslim:biological_process	75	18	0.3544	1
TRIOSE_PHOSPHATE_TRANSMEMBRANE_TRANSPORT	GO:0035436 triose phosphate transmembrane transport, GOslim:biological_process	4	2	0.2822	1
PROTEIN_NEDDYLATION	GO:0045116 protein neddylation, GOslim:biological_process	2	1	0.4375	1
CELLULAR_RESPONSE_TO_OXIDATIVE_STRESS	GO:0034599 cellular response to oxidative stress, GOslim:biological_process	98	23	0.3613	1
TRANSCRIPTION_INITIATION_FROM_RNA_POLYMERASE_II_PROMOTER	GO:0006367 transcription initiation from RNA polymerase II promoter, GOslim:biological_process	17	4	0.5119	1
PEPTIDYL-LYSINE_MODIFICATION_TO_HYPUSINE	GO:0008612 peptidyl-lysine modification to hypusine, GOslim:biological_process	4	3	0.1071	1
INTERPHASE	GO:0051325 interphase, GOslim:biological_process	77	8	0.9875	1
PHYLLOQUINONE_BIOSYNTHETIC_PROCESS	GO:0042372 phylloquinone biosynthetic process, GOslim:biological_process	8	1	0.822	1
HISTONE_DEACETYLATION	GO:0016575 histone deacetylation, GOslim:biological_process	14	2	0.7963	1
BETA-GLUCAN_METABOLIC_PROCESS	GO:0051273 beta-glucan metabolic process, GOslim:biological_process	13	6	0.0986	1
AROMATIC_AMINO_ACID_FAMILY_BIOSYNTHETIC_PROCESS,_PREPHENATE_PATHWAY	GO:0009095 aromatic amino acid family biosynthetic process, prephenate pathway, GOslim:biological_process	11	6	0.0611	1
NEGATIVE_REGULATION_OF_GIBBERELLIC_ACID_MEDIATED_SIGNALING_PATHWAY	GO:0009938 negative regulation of gibberellic acid mediated signaling pathway, GOslim:biological_process	8	3	0.2985	1
CORTICAL_MICROTUBULE_ORGANIZATION	GO:0043622 cortical microtubule organization, GOslim:biological_process	20	4	0.6238	1
POLLEN_DEVELOPMENT	GO:0009555 pollen development, GOslim:biological_process	316	69	0.4241	1
RESPONSE_TO_DESICCATION	GO:0009269 response to desiccation, GOslim:biological_process	39	15	0.0399	1
REGULATION_OF_MITOSIS	GO:0007088 regulation of mitosis, GOslim:biological_process	8	1	0.822	1
CELLULAR_COPPER_ION_HOMEOSTASIS	GO:0006878 cellular copper ion homeostasis, GOslim:biological_process	7	3	0.2469	1
UDP-RHAMNOSE_METABOLIC_PROCESS	GO:0033478 UDP-rhamnose metabolic process, GOslim:biological_process	4	3	0.1071	1
NUCLEOCYTOPLASMIC_TRANSPORT	GO:0006913 nucleocytoplasmic transport, GOslim:biological_process	213	61	0.0238	1
MITOCHONDRIAL_ATP_SYNTHESIS_COUPLED_ELECTRON_TRANSPORT	GO:0042775 mitochondrial ATP synthesis coupled electron transport, GOslim:biological_process	21	4	0.6573	1
SUCCINATE_METABOLIC_PROCESS	GO:0006105 succinate metabolic process, GOslim:biological_process	6	3	0.197	1
ENDOCYTOSIS	GO:0006897 endocytosis, GOslim:biological_process	36	11	0.1856	1
SUGAR_MEDIATED_SIGNALING_PATHWAY	GO:0010182 sugar mediated signaling pathway, GOslim:biological_process	114	33	0.0712	1
XANTHOPHYLL_METABOLIC_PROCESS	GO:0016122 xanthophyll metabolic process, GOslim:biological_process	12	1	0.9174	1
REGULATION_OF_PHOTOSYNTHESIS	GO:0010109 regulation of photosynthesis, GOslim:biological_process	25	2	0.9622	1
CELLULAR_PROCESS_INVOLVED_IN_REPRODUCTION	GO:0048610 cellular process involved in reproduction, GOslim:biological_process	411	62	0.996	1
CELLULAR_RESPONSE_TO_METAL_ION	GO:0071248 cellular response to metal ion, GOslim:biological_process	37	9	0.4112	1
RESPONSE_TO_DNA_DAMAGE_STIMULUS	GO:0006974 response to DNA damage stimulus, GOslim:biological_process	350	47	0.9992	1
POSITIVE_REGULATION_BY_SYMBIONT_OF_HOST_INNATE_IMMUNE_RESPONSE	GO:0052166 positive regulation by symbiont of host innate immune response, GOslim:biological_process	6	5	0.0295	1
MICROTUBULE-BASED_PROCESS	GO:0007017 microtubule-based process, GOslim:biological_process	313	81	0.0607	1
THREONINE_METABOLIC_PROCESS	GO:0006566 threonine metabolic process, GOslim:biological_process	17	4	0.5119	1
PHYTOCHELATIN_METABOLIC_PROCESS	GO:0046937 phytochelatin metabolic process, GOslim:biological_process	2	1	0.4375	1
REGULATION_OF_ETHYLENE_MEDIATED_SIGNALING_PATHWAY	GO:0010104 regulation of ethylene mediated signaling pathway, GOslim:biological_process	15	7	0.0744	1
SPHINGOLIPID_CATABOLIC_PROCESS	GO:0030149 sphingolipid catabolic process, GOslim:biological_process	9	6	0.0337	1
POSITIVE_REGULATION_OF_TRANSLATION	GO:0045727 positive regulation of translation, GOslim:biological_process	21	7	0.2049	1
ETHANOL_METABOLIC_PROCESS	GO:0006067 ethanol metabolic process, GOslim:biological_process	1	1	0.3186	1
CAROTENOID_BIOSYNTHETIC_PROCESS	GO:0016117 carotenoid biosynthetic process, GOslim:biological_process	105	8	0.9996	1
CELL_PLATE_ASSEMBLY	GO:0000919 cell plate assembly, GOslim:biological_process	11	1	0.8999	1
PROTEIN_AUTOPHOSPHORYLATION	GO:0046777 protein autophosphorylation, GOslim:biological_process	146	41	0.0673	1
POLLEN_TUBE_GROWTH	GO:0009860 pollen tube growth, GOslim:biological_process	255	36	0.9931	1
CYTOKINESIS,_SITE_SELECTION	GO:0007105 cytokinesis, site selection, GOslim:biological_process	4	2	0.2822	1
INOSITOL_PHOSPHATE_DEPHOSPHORYLATION	GO:0046855 inositol phosphate dephosphorylation, GOslim:biological_process	23	8	0.1601	1
SULFATE_TRANSPORT	GO:0008272 sulfate transport, GOslim:biological_process	14	5	0.227	1
MRNA_3'-END_PROCESSING	GO:0031124 mRNA 3'-end processing, GOslim:biological_process	9	3	0.3505	1
CYTIDINE_TO_URIDINE_EDITING	GO:0016554 cytidine to uridine editing, GOslim:biological_process	5	1	0.6836	1
NEGATIVE_REGULATION_OF_PEPTIDYL-TYROSINE_PHOSPHORYLATION	GO:0050732 negative regulation of peptidyl-tyrosine phosphorylation, GOslim:biological_process	1	1	0.3186	1
BORATE_TRANSPORT	GO:0046713 borate transport, GOslim:biological_process	4	1	0.6167	1
NADP_METABOLIC_PROCESS	GO:0006739 NADP metabolic process, GOslim:biological_process	204	29	0.9854	1
REGULATION_OF_DEPHOSPHORYLATION	GO:0035303 regulation of dephosphorylation, GOslim:biological_process	137	23	0.8728	1
MOVEMENT_IN_HOST_ENVIRONMENT	GO:0052126 movement in host environment, GOslim:biological_process	8	1	0.822	1
FAT-SOLUBLE_VITAMIN_METABOLIC_PROCESS	GO:0006775 fat-soluble vitamin metabolic process, GOslim:biological_process	16	3	0.669	1
C4-DICARBOXYLATE_TRANSPORT	GO:0015740 C4-dicarboxylate transport, GOslim:biological_process	7	1	0.7844	1
L-ASCORBIC_ACID_BIOSYNTHETIC_PROCESS	GO:0019853 L-ascorbic acid biosynthetic process, GOslim:biological_process	13	4	0.3438	1
MODULATION_BY_ORGANISM_OF_DEFENSE_RESPONSE_OF_OTHER_ORGANISM_INVOLVED_IN_SYMBIOTIC_INTERACTION	GO:0052255 modulation by organism of defense response of other organism involved in symbiotic interaction, GOslim:biological_process	6	5	0.0295	1
PARA-AMINOBENZOIC_ACID_METABOLIC_PROCESS	GO:0046482 para-aminobenzoic acid metabolic process, GOslim:biological_process	38	14	0.0584	1
'DE_NOVO'_IMP_BIOSYNTHETIC_PROCESS	GO:0006189 'de novo' IMP biosynthetic process, GOslim:biological_process	7	2	0.4834	1
POSITIVE_REGULATION_OF_CYTOSKELETON_ORGANIZATION	GO:0051495 positive regulation of cytoskeleton organization, GOslim:biological_process	7	1	0.7844	1
REGULATION_OF_EMBRYO_SAC_EGG_CELL_DIFFERENTIATION	GO:0045694 regulation of embryo sac egg cell differentiation, GOslim:biological_process	2	1	0.4375	1
POTASSIUM_ION_EXPORT	GO:0071435 potassium ion export, GOslim:biological_process	1	1	0.3186	1
MAINTENANCE_OF_INFLORESCENCE_MERISTEM_IDENTITY	GO:0010077 maintenance of inflorescence meristem identity, GOslim:biological_process	9	1	0.8531	1
ESTABLISHMENT_OR_MAINTENANCE_OF_CELL_POLARITY	GO:0007163 establishment or maintenance of cell polarity, GOslim:biological_process	5	2	0.3523	1
PURINE-CONTAINING_COMPOUND_SALVAGE	GO:0043101 purine-containing compound salvage, GOslim:biological_process	8	3	0.2985	1
PROTEIN_TARGETING_TO_ER	GO:0045047 protein targeting to ER, GOslim:biological_process	13	4	0.3438	1
NITRIC_OXIDE_METABOLIC_PROCESS	GO:0046209 nitric oxide metabolic process, GOslim:biological_process	5	2	0.3523	1
PYRIMIDINE_RIBONUCLEOSIDE_METABOLIC_PROCESS	GO:0046131 pyrimidine ribonucleoside metabolic process, GOslim:biological_process	22	5	0.5202	1
INTRACELLULAR_PROTEIN_TRANSMEMBRANE_TRANSPORT	GO:0065002 intracellular protein transmembrane transport, GOslim:biological_process	1	1	0.3186	1
PROTEIN_IMPORT_INTO_MITOCHONDRIAL_OUTER_MEMBRANE	GO:0045040 protein import into mitochondrial outer membrane, GOslim:biological_process	4	3	0.1071	1
DNA_PACKAGING	GO:0006323 DNA packaging, GOslim:biological_process	81	19	0.381	1
ADAXIAL/ABAXIAL_AXIS_SPECIFICATION	GO:0009943 adaxial/abaxial axis specification, GOslim:biological_process	81	13	0.8572	1
EXTRACELLULAR_STRUCTURE_ORGANIZATION	GO:0043062 extracellular structure organization, GOslim:biological_process	6	1	0.7388	1
THIAMINE_DIPHOSPHATE_METABOLIC_PROCESS	GO:0042357 thiamine diphosphate metabolic process, GOslim:biological_process	2	1	0.4375	1
POSITIVE_REGULATION_OF_SECONDARY_GROWTH	GO:2000605 positive regulation of secondary growth, GOslim:biological_process	1	1	0.3186	1
DETECTION_OF_CALCIUM_ION	GO:0005513 detection of calcium ion, GOslim:biological_process	7	3	0.2469	1
GLUTAMINE_METABOLIC_PROCESS	GO:0006541 glutamine metabolic process, GOslim:biological_process	17	4	0.5119	1
RNA_POLYADENYLATION	GO:0043631 RNA polyadenylation, GOslim:biological_process	10	2	0.6459	1
L-ASCORBIC_ACID_METABOLIC_PROCESS	GO:0019852 L-ascorbic acid metabolic process, GOslim:biological_process	13	4	0.3438	1
GUARD_MOTHER_CELL_CYTOKINESIS	GO:0010235 guard mother cell cytokinesis, GOslim:biological_process	1	1	0.3186	1
NEGATIVE_REGULATION_OF_CELLULAR_COMPONENT_ORGANIZATION	GO:0051129 negative regulation of cellular component organization, GOslim:biological_process	20	3	0.7916	1
SYMBIONT_INTRACELLULAR_PROTEIN_TRANSPORT_IN_HOST	GO:0030581 symbiont intracellular protein transport in host, GOslim:biological_process	1	1	0.3186	1
NUCLEOSIDE_MONOPHOSPHATE_METABOLIC_PROCESS	GO:0009123 nucleoside monophosphate metabolic process, GOslim:biological_process	29	12	0.0431	1
GIBBERELLIN_CATABOLIC_PROCESS	GO:0045487 gibberellin catabolic process, GOslim:biological_process	6	1	0.7388	1
DNA_ENDOREDUPLICATION	GO:0042023 DNA endoreduplication, GOslim:biological_process	121	33	0.1172	1
SPECIFICATION_OF_FLORAL_ORGAN_IDENTITY	GO:0010093 specification of floral organ identity, GOslim:biological_process	34	3	0.9681	1
ASPARTATE_FAMILY_AMINO_ACID_CATABOLIC_PROCESS	GO:0009068 aspartate family amino acid catabolic process, GOslim:biological_process	20	5	0.4481	1
PATTERN_SPECIFICATION_PROCESS	GO:0007389 pattern specification process, GOslim:biological_process	341	77	0.3186	1
EMBRYONIC_ROOT_MORPHOGENESIS	GO:0010086 embryonic root morphogenesis, GOslim:biological_process	2	1	0.4375	1
REGULATION_OF_EPIDERMIS_DEVELOPMENT	GO:0045682 regulation of epidermis development, GOslim:biological_process	6	1	0.7388	1
AUXIN_METABOLIC_PROCESS	GO:0009850 auxin metabolic process, GOslim:biological_process	141	40	0.0632	1
LIPID_STORAGE	GO:0019915 lipid storage, GOslim:biological_process	101	20	0.6425	1
MEIOSIS_I	GO:0007127 meiosis I, GOslim:biological_process	153	24	0.9326	1
ABSCISIC_ACID_METABOLIC_PROCESS	GO:0009687 abscisic acid metabolic process, GOslim:biological_process	43	10	0.4483	1
REGULATION_OF_PEPTIDASE_ACTIVITY	GO:0052547 regulation of peptidase activity, GOslim:biological_process	10	2	0.6459	1
NEGATIVE_REGULATION_OF_CELL_PROLIFERATION	GO:0008285 negative regulation of cell proliferation, GOslim:biological_process	5	1	0.6836	1
ASPARTATE_FAMILY_AMINO_ACID_BIOSYNTHETIC_PROCESS	GO:0009067 aspartate family amino acid biosynthetic process, GOslim:biological_process	126	36	0.07	1
STEM_CELL_FATE_COMMITMENT	GO:0048865 stem cell fate commitment, GOslim:biological_process	1	1	0.3186	1
MANNITOL_METABOLIC_PROCESS	GO:0019594 mannitol metabolic process, GOslim:biological_process	1	1	0.3186	1
MRNA_SPLICING,_VIA_SPLICEOSOME	GO:0000398 mRNA splicing, via spliceosome, GOslim:biological_process	120	17	0.9576	1
BIOTIN_METABOLIC_PROCESS	GO:0006768 biotin metabolic process, GOslim:biological_process	3	1	0.5357	1
DTMP_METABOLIC_PROCESS	GO:0046073 dTMP metabolic process, GOslim:biological_process	3	1	0.5357	1
REPRODUCTIVE_PROCESS	GO:0022414 reproductive process, GOslim:biological_process	2198	468	0.4503	1
RESPONSE_TO_REDOX_STATE	GO:0051775 response to redox state, GOslim:biological_process	3	1	0.5357	1
PROTEIN_OLIGOMERIZATION	GO:0051259 protein oligomerization, GOslim:biological_process	22	6	0.3615	1
NAD_BIOSYNTHETIC_PROCESS	GO:0009435 NAD biosynthetic process, GOslim:biological_process	7	1	0.7844	1
NEGATIVE_REGULATION_OF_CELL_CYCLE_PROCESS	GO:0010948 negative regulation of cell cycle process, GOslim:biological_process	13	1	0.9318	1
SHADE_AVOIDANCE	GO:0009641 shade avoidance, GOslim:biological_process	15	4	0.4295	1
PHOSPHOENOLPYRUVATE_TRANSPORT	GO:0015714 phosphoenolpyruvate transport, GOslim:biological_process	4	4	0.0358	1
POSITIVE_REGULATION_OF_TRANSLATIONAL_TERMINATION	GO:0045905 positive regulation of translational termination, GOslim:biological_process	3	2	0.2115	1
HOMOLOGOUS_CHROMOSOME_SEGREGATION	GO:0045143 homologous chromosome segregation, GOslim:biological_process	4	1	0.6167	1
HORMONE_CATABOLIC_PROCESS	GO:0042447 hormone catabolic process, GOslim:biological_process	7	2	0.4834	1
GLUCOSE_CATABOLIC_PROCESS_TO_LACTATE_AND_ACETATE	GO:0019658 glucose catabolic process to lactate and acetate, GOslim:biological_process	6	1	0.7388	1
REGULATION_OF_RESPONSE_TO_EXTRACELLULAR_STIMULUS	GO:0032104 regulation of response to extracellular stimulus, GOslim:biological_process	4	3	0.1071	1
NEGATIVE_REGULATION_OF_SEED_GERMINATION	GO:0010187 negative regulation of seed germination, GOslim:biological_process	15	5	0.2623	1
S-GLYCOSIDE_BIOSYNTHETIC_PROCESS	GO:0016144 S-glycoside biosynthetic process, GOslim:biological_process	172	34	0.6681	1
RESPONSE_TO_ACIDITY	GO:0010447 response to acidity, GOslim:biological_process	2	2	0.143	1
S-GLYCOSIDE_METABOLIC_PROCESS	GO:0016143 S-glycoside metabolic process, GOslim:biological_process	205	43	0.5449	1
PLANT-TYPE_CELL_WALL_ORGANIZATION_OR_BIOGENESIS	GO:0071669 plant-type cell wall organization or biogenesis, GOslim:biological_process	468	114	0.0956	1
PROTEIN_ADP-RIBOSYLATION	GO:0006471 protein ADP-ribosylation, GOslim:biological_process	4	1	0.6167	1
ICOSANOID_BIOSYNTHETIC_PROCESS	GO:0046456 icosanoid biosynthetic process, GOslim:biological_process	2	2	0.143	1
POLYOL_METABOLIC_PROCESS	GO:0019751 polyol metabolic process, GOslim:biological_process	136	36	0.1355	1
UDP-GLUCURONATE_BIOSYNTHETIC_PROCESS	GO:0006065 UDP-glucuronate biosynthetic process, GOslim:biological_process	4	3	0.1071	1
REGULATION_OF_ROOT_MORPHOGENESIS	GO:2000067 regulation of root morphogenesis, GOslim:biological_process	4	1	0.6167	1
CELLULAR_CELL_WALL_ORGANIZATION	GO:0007047 cellular cell wall organization, GOslim:biological_process	16	7	0.0915	1
RADIAL_AXIS_SPECIFICATION	GO:0009945 radial axis specification, GOslim:biological_process	3	1	0.5357	1
ACTIN_POLYMERIZATION_OR_DEPOLYMERIZATION	GO:0008154 actin polymerization or depolymerization, GOslim:biological_process	27	5	0.6789	1
'DE_NOVO'_GDP-L-FUCOSE_BIOSYNTHETIC_PROCESS	GO:0042351 'de novo' GDP-L-fucose biosynthetic process, GOslim:biological_process	1	1	0.3186	1
CELLULAR_RESPONSE_TO_CYTOKINE_STIMULUS	GO:0071345 cellular response to cytokine stimulus, GOslim:biological_process	1	1	0.3186	1
ORGANELLE_FUSION	GO:0048284 organelle fusion, GOslim:biological_process	55	16	0.1644	1
CELL_MORPHOGENESIS_INVOLVED_IN_DIFFERENTIATION	GO:0000904 cell morphogenesis involved in differentiation, GOslim:biological_process	405	88	0.4256	1
CYSTEINYL-TRNA_AMINOACYLATION	GO:0006423 cysteinyl-tRNA aminoacylation, GOslim:biological_process	3	1	0.5357	1
G2/M_TRANSITION_OF_MITOTIC_CELL_CYCLE	GO:0000086 G2/M transition of mitotic cell cycle, GOslim:biological_process	70	8	0.9729	1
POSITIVE_REGULATION_OF_BRASSINOSTEROID_MEDIATED_SIGNALING_PATHWAY	GO:1900459 positive regulation of brassinosteroid mediated signaling pathway, GOslim:biological_process	2	1	0.4375	1
ORGANOPHOSPHATE_METABOLIC_PROCESS	GO:0019637 organophosphate metabolic process, GOslim:biological_process	483	80	0.984	1
SPECIFICATION_OF_ORGAN_IDENTITY	GO:0010092 specification of organ identity, GOslim:biological_process	34	3	0.9681	1
MALE_GAMETE_GENERATION	GO:0048232 male gamete generation, GOslim:biological_process	38	7	0.6912	1
D-RIBOSE_METABOLIC_PROCESS	GO:0006014 D-ribose metabolic process, GOslim:biological_process	16	1	0.9617	1
DNA_INTEGRATION	GO:0015074 DNA integration, GOslim:biological_process	2	1	0.4375	1
DETECTION_OF_HORMONE_STIMULUS	GO:0009720 detection of hormone stimulus, GOslim:biological_process	6	3	0.197	1
NEGATIVE_REGULATION_OF_PHOTOMORPHOGENESIS	GO:0010100 negative regulation of photomorphogenesis, GOslim:biological_process	17	4	0.5119	1
POLYOL_BIOSYNTHETIC_PROCESS	GO:0046173 polyol biosynthetic process, GOslim:biological_process	81	17	0.5525	1
CELLULAR_POTASSIUM_ION_HOMEOSTASIS	GO:0030007 cellular potassium ion homeostasis, GOslim:biological_process	5	1	0.6836	1
CADMIUM_ION_TRANSPORT	GO:0015691 cadmium ion transport, GOslim:biological_process	10	5	0.1051	1
POSITIVE_REGULATION_OF_TRANSLATIONAL_ELONGATION	GO:0045901 positive regulation of translational elongation, GOslim:biological_process	3	2	0.2115	1
ALTERNATIVE_MRNA_SPLICING,_VIA_SPLICEOSOME	GO:0000380 alternative mRNA splicing, via spliceosome, GOslim:biological_process	4	2	0.2822	1
PYRIDINE_NUCLEOTIDE_BIOSYNTHETIC_PROCESS	GO:0019363 pyridine nucleotide biosynthetic process, GOslim:biological_process	11	2	0.6902	1
VITAMIN_B6_BIOSYNTHETIC_PROCESS	GO:0042819 vitamin B6 biosynthetic process, GOslim:biological_process	12	1	0.9174	1
FARNESYL_DIPHOSPHATE_BIOSYNTHETIC_PROCESS	GO:0045337 farnesyl diphosphate biosynthetic process, GOslim:biological_process	2	2	0.143	1
FATTY-ACYL-COA_TRANSPORT	GO:0015916 fatty-acyl-CoA transport, GOslim:biological_process	1	1	0.3186	1
REGULATION_OF_CELL_DIVISION	GO:0051302 regulation of cell division, GOslim:biological_process	55	12	0.5106	1
POLLEN_MATURATION	GO:0010152 pollen maturation, GOslim:biological_process	12	5	0.1614	1
POSITIVE_REGULATION_OF_CELLULAR_RESPONSE_TO_PHOSPHATE_STARVATION	GO:0080040 positive regulation of cellular response to phosphate starvation, GOslim:biological_process	3	2	0.2115	1
SELENATE_TRANSPORT	GO:0080160 selenate transport, GOslim:biological_process	2	1	0.4375	1
REGULATION_OF_TRANSCRIPTION_ELONGATION_FROM_RNA_POLYMERASE_II_PROMOTER	GO:0034243 regulation of transcription elongation from RNA polymerase II promoter, GOslim:biological_process	4	2	0.2822	1
TAPETAL_LAYER_DEVELOPMENT	GO:0048658 tapetal layer development, GOslim:biological_process	10	1	0.8787	1
CLATHRIN_COAT_ASSEMBLY	GO:0048268 clathrin coat assembly, GOslim:biological_process	14	4	0.3869	1
PECTIN_CATABOLIC_PROCESS	GO:0045490 pectin catabolic process, GOslim:biological_process	2	1	0.4375	1
THIAMINE_PYROPHOSPHATE_TRANSPORT	GO:0030974 thiamine pyrophosphate transport, GOslim:biological_process	2	1	0.4375	1
INFLAMMATORY_RESPONSE	GO:0006954 inflammatory response, GOslim:biological_process	5	3	0.1499	1
RESPONSE_TO_BLUE_LIGHT	GO:0009637 response to blue light, GOslim:biological_process	126	22	0.8256	1
PROTEIN_TARGETING_TO_MITOCHONDRION	GO:0006626 protein targeting to mitochondrion, GOslim:biological_process	106	30	0.0983	1
METHYLGLYOXAL_METABOLIC_PROCESS	GO:0009438 methylglyoxal metabolic process, GOslim:biological_process	96	20	0.562	1
COVALENT_CHROMATIN_MODIFICATION	GO:0016569 covalent chromatin modification, GOslim:biological_process	416	83	0.7037	1
GENERATIVE_CELL_MITOSIS	GO:0055047 generative cell mitosis, GOslim:biological_process	2	1	0.4375	1
CHITIN_METABOLIC_PROCESS	GO:0006030 chitin metabolic process, GOslim:biological_process	1	1	0.3186	1
BRANCHED-CHAIN_AMINO_ACID_METABOLIC_PROCESS	GO:0009081 branched-chain amino acid metabolic process, GOslim:biological_process	32	2	0.988	1
PURINE_RIBONUCLEOSIDE_BIOSYNTHETIC_PROCESS	GO:0046129 purine ribonucleoside biosynthetic process, GOslim:biological_process	3	2	0.2115	1
ENDOSPERM_DEVELOPMENT	GO:0009960 endosperm development, GOslim:biological_process	20	1	0.9822	1
DOLICHOL-LINKED_OLIGOSACCHARIDE_BIOSYNTHETIC_PROCESS	GO:0006488 dolichol-linked oligosaccharide biosynthetic process, GOslim:biological_process	1	1	0.3186	1
HYDROGEN_PEROXIDE-MEDIATED_PROGRAMMED_CELL_DEATH	GO:0010421 hydrogen peroxide-mediated programmed cell death, GOslim:biological_process	2	2	0.143	1
TRITERPENOID_BIOSYNTHETIC_PROCESS	GO:0016104 triterpenoid biosynthetic process, GOslim:biological_process	42	12	0.2228	1
TELOMERE_MAINTENANCE_IN_RESPONSE_TO_DNA_DAMAGE	GO:0043247 telomere maintenance in response to DNA damage, GOslim:biological_process	52	7	0.9095	1
GLUCOSINOLATE_CATABOLIC_PROCESS	GO:0019762 glucosinolate catabolic process, GOslim:biological_process	14	6	0.121	1
RIBONUCLEOSIDE_MONOPHOSPHATE_BIOSYNTHETIC_PROCESS	GO:0009156 ribonucleoside monophosphate biosynthetic process, GOslim:biological_process	24	9	0.1079	1
CELLULAR_COMPONENT_ASSEMBLY_INVOLVED_IN_MORPHOGENESIS	GO:0010927 cellular component assembly involved in morphogenesis, GOslim:biological_process	60	6	0.9818	1
PEPTIDE_BIOSYNTHETIC_PROCESS	GO:0043043 peptide biosynthetic process, GOslim:biological_process	16	2	0.8478	1
ETHANOL_OXIDATION	GO:0006069 ethanol oxidation, GOslim:biological_process	1	1	0.3186	1
PYRIMIDINE_DEOXYRIBONUCLEOSIDE_MONOPHOSPHATE_BIOSYNTHETIC_PROCESS	GO:0009177 pyrimidine deoxyribonucleoside monophosphate biosynthetic process, GOslim:biological_process	3	1	0.5357	1
DETECTION_OF_MECHANICAL_STIMULUS	GO:0050982 detection of mechanical stimulus, GOslim:biological_process	2	2	0.143	1
POSITIVE_REGULATION_OF_ORGANELLE_ORGANIZATION	GO:0010638 positive regulation of organelle organization, GOslim:biological_process	58	20	0.0442	1
SPINDLE_ASSEMBLY_INVOLVED_IN_MEIOSIS	GO:0090306 spindle assembly involved in meiosis, GOslim:biological_process	1	1	0.3186	1
ALANINE_METABOLIC_PROCESS	GO:0006522 alanine metabolic process, GOslim:biological_process	2	1	0.4375	1
RESPONSE_TO_UV-C	GO:0010225 response to UV-C, GOslim:biological_process	6	1	0.7388	1
HISTONE_ACETYLATION	GO:0016573 histone acetylation, GOslim:biological_process	15	3	0.6312	1
EMBRYONIC_MERISTEM_DEVELOPMENT	GO:0048508 embryonic meristem development, GOslim:biological_process	59	19	0.0763	1
NUCLEOSIDE_MONOPHOSPHATE_BIOSYNTHETIC_PROCESS	GO:0009124 nucleoside monophosphate biosynthetic process, GOslim:biological_process	28	11	0.0654	1
NEGATIVE_REGULATION_OF_MULTICELLULAR_ORGANISMAL_PROCESS	GO:0051241 negative regulation of multicellular organismal process, GOslim:biological_process	15	5	0.2623	1
ASPARAGINE_METABOLIC_PROCESS	GO:0006528 asparagine metabolic process, GOslim:biological_process	10	2	0.6459	1
CELLULAR_ALKANE_METABOLIC_PROCESS	GO:0043446 cellular alkane metabolic process, GOslim:biological_process	3	1	0.5357	1
REGULATION_OF_NITROGEN_UTILIZATION	GO:0006808 regulation of nitrogen utilization, GOslim:biological_process	7	1	0.7844	1
REGULATION_OF_CHROMATIN_SILENCING	GO:0031935 regulation of chromatin silencing, GOslim:biological_process	4	1	0.6167	1
PYRIMIDINE_NUCLEOSIDE_INTERCONVERSION	GO:0019689 pyrimidine nucleoside interconversion, GOslim:biological_process	5	1	0.6836	1
REGULATION_OF_PROTEIN_MODIFICATION_PROCESS	GO:0031399 regulation of protein modification process, GOslim:biological_process	148	27	0.7878	1
D-AMINO_ACID_METABOLIC_PROCESS	GO:0046416 D-amino acid metabolic process, GOslim:biological_process	3	1	0.5357	1
REGULATION_OF_ACTIN_FILAMENT_POLYMERIZATION	GO:0030833 regulation of actin filament polymerization, GOslim:biological_process	16	2	0.8478	1
GAMMA-AMINOBUTYRIC_ACID_CATABOLIC_PROCESS	GO:0009450 gamma-aminobutyric acid catabolic process, GOslim:biological_process	2	2	0.143	1
MONOCARBOXYLIC_ACID_TRANSPORT	GO:0015718 monocarboxylic acid transport, GOslim:biological_process	7	1	0.7844	1
GTP_BIOSYNTHETIC_PROCESS	GO:0006183 GTP biosynthetic process, GOslim:biological_process	6	2	0.4197	1
REGULATION_OF_BETA-GLUCAN_BIOSYNTHETIC_PROCESS	GO:0032951 regulation of beta-glucan biosynthetic process, GOslim:biological_process	1	1	0.3186	1
GLYCEROL_ETHER_BIOSYNTHETIC_PROCESS	GO:0046504 glycerol ether biosynthetic process, GOslim:biological_process	16	8	0.0451	1
REGULATION_OF_SYMBIOSIS,_ENCOMPASSING_MUTUALISM_THROUGH_PARASITISM	GO:0043903 regulation of symbiosis, encompassing mutualism through parasitism, GOslim:biological_process	2	1	0.4375	1
PHOTOTRANSDUCTION	GO:0007602 phototransduction, GOslim:biological_process	18	3	0.7359	1
MOVEMENT_IN_OTHER_ORGANISM_INVOLVED_IN_SYMBIOTIC_INTERACTION	GO:0051814 movement in other organism involved in symbiotic interaction, GOslim:biological_process	8	1	0.822	1
CELLULAR_RESPONSE_TO_SELENIUM_ION	GO:0071291 cellular response to selenium ion, GOslim:biological_process	1	1	0.3186	1
POTASSIUM_ION_HOMEOSTASIS	GO:0055075 potassium ion homeostasis, GOslim:biological_process	11	3	0.4524	1
INTER-GOLGI_CISTERNA_VESICLE-MEDIATED_TRANSPORT	GO:0048219 inter-Golgi cisterna vesicle-mediated transport, GOslim:biological_process	1	1	0.3186	1
DNA_MEDIATED_TRANSFORMATION	GO:0009294 DNA mediated transformation, GOslim:biological_process	31	7	0.5035	1
EMBRYONIC_MERISTEM_INITIATION	GO:0090421 embryonic meristem initiation, GOslim:biological_process	2	1	0.4375	1
M_PHASE	GO:0000279 M phase, GOslim:biological_process	304	58	0.7835	1
NEGATIVE_REGULATION_OF_CELLULAR_DEFENSE_RESPONSE	GO:0051245 negative regulation of cellular defense response, GOslim:biological_process	2	2	0.143	1
DNA_REPLICATION	GO:0006260 DNA replication, GOslim:biological_process	337	45	0.9992	1
DISACCHARIDE_BIOSYNTHETIC_PROCESS	GO:0046351 disaccharide biosynthetic process, GOslim:biological_process	46	12	0.3065	1
CELLULAR_RESPONSE_TO_INORGANIC_SUBSTANCE	GO:0071241 cellular response to inorganic substance, GOslim:biological_process	40	9	0.4911	1
LACTOSE_CATABOLIC_PROCESS,_USING_GLUCOSIDE_3-DEHYDROGENASE	GO:0019513 lactose catabolic process, using glucoside 3-dehydrogenase, GOslim:biological_process	12	4	0.3009	1
RECEPTOR_RECYCLING	GO:0001881 receptor recycling, GOslim:biological_process	1	1	0.3186	1
POSITIVE_REGULATION_OF_GTPASE_ACTIVITY	GO:0043547 positive regulation of GTPase activity, GOslim:biological_process	3	3	0.0701	1
CELLULAR_RESPONSE_TO_NITROGEN_STARVATION	GO:0006995 cellular response to nitrogen starvation, GOslim:biological_process	23	8	0.1601	1
PROTEIN_AUTOUBIQUITINATION	GO:0051865 protein autoubiquitination, GOslim:biological_process	11	5	0.1319	1
REGULATION_OF_LEAF_DEVELOPMENT	GO:2000024 regulation of leaf development, GOslim:biological_process	5	1	0.6836	1
UTP_BIOSYNTHETIC_PROCESS	GO:0006228 UTP biosynthetic process, GOslim:biological_process	6	2	0.4197	1
LEAF_PAVEMENT_CELL_DEVELOPMENT	GO:0090436 leaf pavement cell development, GOslim:biological_process	3	1	0.5357	1
DNA_ALKYLATION	GO:0006305 DNA alkylation, GOslim:biological_process	180	22	0.9965	1
SESQUITERPENE_CATABOLIC_PROCESS	GO:0051763 sesquiterpene catabolic process, GOslim:biological_process	2	2	0.143	1
CTP_BIOSYNTHETIC_PROCESS	GO:0006241 CTP biosynthetic process, GOslim:biological_process	6	2	0.4197	1
1-AMINOCYCLOPROPANE-1-CARBOXYLATE_BIOSYNTHETIC_PROCESS	GO:0042218 1-aminocyclopropane-1-carboxylate biosynthetic process, GOslim:biological_process	23	4	0.718	1
REGULATION_OF_RAFFINOSE_METABOLIC_PROCESS	GO:0080091 regulation of raffinose metabolic process, GOslim:biological_process	1	1	0.3186	1
TERPENE_METABOLIC_PROCESS	GO:0042214 terpene metabolic process, GOslim:biological_process	66	12	0.7292	1
HISTONE_H4_ACETYLATION	GO:0043967 histone H4 acetylation, GOslim:biological_process	4	1	0.6167	1
VALYL-TRNA_AMINOACYLATION	GO:0006438 valyl-tRNA aminoacylation, GOslim:biological_process	3	1	0.5357	1
NEGATIVE_REGULATION_OF_IRON_ION_TRANSPORT	GO:0034757 negative regulation of iron ion transport, GOslim:biological_process	2	1	0.4375	1
ACYLGLYCEROL_BIOSYNTHETIC_PROCESS	GO:0046463 acylglycerol biosynthetic process, GOslim:biological_process	16	8	0.0451	1
PENTOSE_BIOSYNTHETIC_PROCESS	GO:0019322 pentose biosynthetic process, GOslim:biological_process	3	1	0.5357	1
RESPONSE_TO_BORON-CONTAINING_SUBSTANCE	GO:0010036 response to boron-containing substance, GOslim:biological_process	4	1	0.6167	1
POSITIVE_REGULATION_OF_RNA_METABOLIC_PROCESS	GO:0051254 positive regulation of RNA metabolic process, GOslim:biological_process	466	82	0.9478	1
M_PHASE_OF_MEIOTIC_CELL_CYCLE	GO:0051327 M phase of meiotic cell cycle, GOslim:biological_process	218	41	0.7778	1
REGULATION_OF_STOMATAL_COMPLEX_DEVELOPMENT	GO:2000038 regulation of stomatal complex development, GOslim:biological_process	5	3	0.1499	1
OLIGOSACCHARIDE_CATABOLIC_PROCESS	GO:0009313 oligosaccharide catabolic process, GOslim:biological_process	24	8	0.1827	1
RRNA_METABOLIC_PROCESS	GO:0016072 rRNA metabolic process, GOslim:biological_process	324	17	1	1
ENZYME_LINKED_RECEPTOR_PROTEIN_SIGNALING_PATHWAY	GO:0007167 enzyme linked receptor protein signaling pathway, GOslim:biological_process	130	36	0.0928	1
LACTOSE_METABOLIC_PROCESS	GO:0005988 lactose metabolic process, GOslim:biological_process	15	7	0.0744	1
STEM_CELL_DIFFERENTIATION	GO:0048863 stem cell differentiation, GOslim:biological_process	67	15	0.4653	1
MITOTIC_CELL_CYCLE	GO:0000278 mitotic cell cycle, GOslim:biological_process	303	52	0.9316	1
POSITIVE_REGULATION_OF_MACROMOLECULE_BIOSYNTHETIC_PROCESS	GO:0010557 positive regulation of macromolecule biosynthetic process, GOslim:biological_process	486	88	0.9218	1
CELLULAR_DEFENSE_RESPONSE	GO:0006968 cellular defense response, GOslim:biological_process	4	2	0.2822	1
ETHER_METABOLIC_PROCESS	GO:0018904 ether metabolic process, GOslim:biological_process	65	22	0.0416	1
RIBONUCLEOPROTEIN_COMPLEX_BIOGENESIS	GO:0022613 ribonucleoprotein complex biogenesis, GOslim:biological_process	445	26	1	1
SEQUESTERING_OF_ZINC_ION	GO:0032119 sequestering of zinc ion, GOslim:biological_process	2	2	0.143	1
PHOTOPROTECTION	GO:0010117 photoprotection, GOslim:biological_process	4	2	0.2822	1
WATER-SOLUBLE_VITAMIN_BIOSYNTHETIC_PROCESS	GO:0042364 water-soluble vitamin biosynthetic process, GOslim:biological_process	61	11	0.7327	1
PHOSPHATIDIC_ACID_METABOLIC_PROCESS	GO:0046473 phosphatidic acid metabolic process, GOslim:biological_process	1	1	0.3186	1
CELLULAR_HEAT_ACCLIMATION	GO:0070370 cellular heat acclimation, GOslim:biological_process	6	1	0.7388	1
CYTOSOL_TO_ER_TRANSPORT	GO:0046967 cytosol to ER transport, GOslim:biological_process	1	1	0.3186	1
PURINE_RIBONUCLEOSIDE_CATABOLIC_PROCESS	GO:0046130 purine ribonucleoside catabolic process, GOslim:biological_process	4	2	0.2822	1
PURINE_NUCLEOSIDE_MONOPHOSPHATE_METABOLIC_PROCESS	GO:0009126 purine nucleoside monophosphate metabolic process, GOslim:biological_process	16	6	0.1724	1
GENETIC_IMPRINTING	GO:0071514 genetic imprinting, GOslim:biological_process	13	3	0.5469	1
SIGNALOSOME_ASSEMBLY	GO:0010387 signalosome assembly, GOslim:biological_process	6	2	0.4197	1
AUXIN_BIOSYNTHETIC_PROCESS	GO:0009851 auxin biosynthetic process, GOslim:biological_process	124	34	0.1084	1
PHOTOSYNTHESIS,_LIGHT_REACTION	GO:0019684 photosynthesis, light reaction, GOslim:biological_process	333	9	1	1
RESPONSE_TO_COBALT_ION	GO:0032025 response to cobalt ion, GOslim:biological_process	2	1	0.4375	1
GAMMA-AMINOBUTYRIC_ACID_METABOLIC_PROCESS	GO:0009448 gamma-aminobutyric acid metabolic process, GOslim:biological_process	2	2	0.143	1
RESPONSE_TO_PEPTIDOGLYCAN	GO:0032494 response to peptidoglycan, GOslim:biological_process	1	1	0.3186	1
PROTEIN_INSERTION_INTO_MEMBRANE	GO:0051205 protein insertion into membrane, GOslim:biological_process	7	1	0.7844	1
CELL_JUNCTION_ASSEMBLY	GO:0034329 cell junction assembly, GOslim:biological_process	6	4	0.0803	1
AUTOPHAGY_IN_RESPONSE_TO_ER_OVERLOAD	GO:0034263 autophagy in response to ER overload, GOslim:biological_process	1	1	0.3186	1
STEM_CELL_MAINTENANCE	GO:0019827 stem cell maintenance, GOslim:biological_process	65	13	0.6188	1
FOLIC_ACID-CONTAINING_COMPOUND_METABOLIC_PROCESS	GO:0006760 folic acid-containing compound metabolic process, GOslim:biological_process	65	16	0.3349	1
NITRATE_ASSIMILATION	GO:0042128 nitrate assimilation, GOslim:biological_process	9	3	0.3505	1
VITAMIN_B6_METABOLIC_PROCESS	GO:0042816 vitamin B6 metabolic process, GOslim:biological_process	12	1	0.9174	1
NEGATIVE_REGULATION_OF_CELLULAR_CATABOLIC_PROCESS	GO:0031330 negative regulation of cellular catabolic process, GOslim:biological_process	3	2	0.2115	1
ACTIN_FILAMENT-BASED_MOVEMENT	GO:0030048 actin filament-based movement, GOslim:biological_process	82	21	0.2506	1
NEGATIVE_REGULATION_OF_GENE_EXPRESSION,_EPIGENETIC	GO:0045814 negative regulation of gene expression, epigenetic, GOslim:biological_process	245	46	0.7921	1
PATTERN_RECOGNITION_RECEPTOR_SIGNALING_PATHWAY	GO:0002221 pattern recognition receptor signaling pathway, GOslim:biological_process	1	1	0.3186	1
MITOCHONDRIAL_TRANSPORT	GO:0006839 mitochondrial transport, GOslim:biological_process	153	43	0.0618	1
REGULATION_OF_HISTONE_MODIFICATION	GO:0031056 regulation of histone modification, GOslim:biological_process	8	2	0.5425	1
CELLULAR_RESPONSE_TO_OXYGEN_LEVELS	GO:0071453 cellular response to oxygen levels, GOslim:biological_process	26	11	0.0464	1
DEMETHYLATION	GO:0070988 demethylation, GOslim:biological_process	7	1	0.7844	1
MODULATION_BY_SYMBIONT_OF_HOST_DEFENSE_RESPONSE	GO:0052031 modulation by symbiont of host defense response, GOslim:biological_process	6	5	0.0295	1
GLUTATHIONE_CATABOLIC_PROCESS	GO:0006751 glutathione catabolic process, GOslim:biological_process	4	2	0.2822	1
MITOCHONDRION_ORGANIZATION	GO:0007005 mitochondrion organization, GOslim:biological_process	127	35	0.1003	1
REGULATION_OF_CELLULAR_COMPONENT_BIOGENESIS	GO:0044087 regulation of cellular component biogenesis, GOslim:biological_process	21	4	0.6573	1
CYTOKININ_TRANSPORT	GO:0010184 cytokinin transport, GOslim:biological_process	1	1	0.3186	1
POSITIVE_REGULATION_OF_PROTEIN_KINASE_ACTIVITY	GO:0045860 positive regulation of protein kinase activity, GOslim:biological_process	13	7	0.0463	1
POSITIVE_REGULATION_OF_HISTONE_MODIFICATION	GO:0031058 positive regulation of histone modification, GOslim:biological_process	2	1	0.4375	1
SULFUR_COMPOUND_BIOSYNTHETIC_PROCESS	GO:0044272 sulfur compound biosynthetic process, GOslim:biological_process	485	112	0.2118	1
SNRNA_MODIFICATION	GO:0040031 snRNA modification, GOslim:biological_process	3	1	0.5357	1
COENZYME_METABOLIC_PROCESS	GO:0006732 coenzyme metabolic process, GOslim:biological_process	507	117	0.208	1
NUCLEUS_ORGANIZATION	GO:0006997 nucleus organization, GOslim:biological_process	86	27	0.0503	1
CHLORIDE_TRANSPORT	GO:0006821 chloride transport, GOslim:biological_process	8	2	0.5425	1
REGULATION_OF_HORMONE_BIOSYNTHETIC_PROCESS	GO:0046885 regulation of hormone biosynthetic process, GOslim:biological_process	6	1	0.7388	1
DEOXYRIBONUCLEOSIDE_DIPHOSPHATE_METABOLIC_PROCESS	GO:0009186 deoxyribonucleoside diphosphate metabolic process, GOslim:biological_process	3	1	0.5357	1
CELLULAR_RESPONSE_TO_GLUCOSE_STARVATION	GO:0042149 cellular response to glucose starvation, GOslim:biological_process	1	1	0.3186	1
FATTY-ACYL_GROUP_TRANSPORT	GO:0015915 fatty-acyl group transport, GOslim:biological_process	1	1	0.3186	1
POLLEN_WALL_ASSEMBLY	GO:0010208 pollen wall assembly, GOslim:biological_process	60	6	0.9818	1
FERTILIZATION	GO:0009566 fertilization, GOslim:biological_process	33	9	0.3051	1
REGULATION_OF_POLYSACCHARIDE_BIOSYNTHETIC_PROCESS	GO:0032885 regulation of polysaccharide biosynthetic process, GOslim:biological_process	4	3	0.1071	1
REGULATION_OF_HISTONE_H3-K9_METHYLATION	GO:0051570 regulation of histone H3-K9 methylation, GOslim:biological_process	2	1	0.4375	1
PHOSPHOLIPID_METABOLIC_PROCESS	GO:0006644 phospholipid metabolic process, GOslim:biological_process	472	76	0.9904	1
PURINE_NUCLEOBASE_BIOSYNTHETIC_PROCESS	GO:0009113 purine nucleobase biosynthetic process, GOslim:biological_process	13	3	0.5469	1
CELLULAR_RESPONSE_TO_NITRIC_OXIDE	GO:0071732 cellular response to nitric oxide, GOslim:biological_process	20	5	0.4481	1
NUCLEOSIDE_DIPHOSPHATE_PHOSPHORYLATION	GO:0006165 nucleoside diphosphate phosphorylation, GOslim:biological_process	6	2	0.4197	1
NEGATIVE_REGULATION_OF_APOPTOTIC_PROCESS	GO:0043066 negative regulation of apoptotic process, GOslim:biological_process	3	1	0.5357	1
REGULATION_OF_CYCLIN-DEPENDENT_PROTEIN_KINASE_ACTIVITY	GO:0000079 regulation of cyclin-dependent protein kinase activity, GOslim:biological_process	60	16	0.2437	1
CYSTEINE_BIOSYNTHETIC_PROCESS_FROM_SERINE	GO:0006535 cysteine biosynthetic process from serine, GOslim:biological_process	14	4	0.3869	1
TISSUE_MORPHOGENESIS	GO:0048729 tissue morphogenesis, GOslim:biological_process	5	1	0.6836	1
CGMP_METABOLIC_PROCESS	GO:0046068 cGMP metabolic process, GOslim:biological_process	1	1	0.3186	1
MITOCHONDRIAL_MEMBRANE_ORGANIZATION	GO:0007006 mitochondrial membrane organization, GOslim:biological_process	12	4	0.3009	1
INDOLALKYLAMINE_BIOSYNTHETIC_PROCESS	GO:0046219 indolalkylamine biosynthetic process, GOslim:biological_process	26	8	0.2318	1
CELLULAR_RESPONSE_TO_LIGHT_INTENSITY	GO:0071484 cellular response to light intensity, GOslim:biological_process	9	1	0.8531	1
REGULATION_OF_CHLOROPHYLL_BIOSYNTHETIC_PROCESS	GO:0010380 regulation of chlorophyll biosynthetic process, GOslim:biological_process	13	2	0.7651	1
RIBOFLAVIN_METABOLIC_PROCESS	GO:0006771 riboflavin metabolic process, GOslim:biological_process	10	1	0.8787	1
MACROMOLECULE_METHYLATION	GO:0043414 macromolecule methylation, GOslim:biological_process	537	93	0.9697	1
SRP-DEPENDENT_COTRANSLATIONAL_PROTEIN_TARGETING_TO_MEMBRANE	GO:0006614 SRP-dependent cotranslational protein targeting to membrane, GOslim:biological_process	12	3	0.5008	1
DNA-DEPENDENT_TRANSCRIPTION,_INITIATION	GO:0006352 DNA-dependent transcription, initiation, GOslim:biological_process	53	9	0.777	1
NEGATIVE_REGULATION_OF_DEFENSE_RESPONSE_TO_INSECT	GO:1900366 negative regulation of defense response to insect, GOslim:biological_process	1	1	0.3186	1
POSITIVE_REGULATION_OF_DNA-DEPENDENT_TRANSCRIPTION,_ELONGATION	GO:0032786 positive regulation of DNA-dependent transcription, elongation, GOslim:biological_process	5	2	0.3523	1
PROCAMBIUM_HISTOGENESIS	GO:0010067 procambium histogenesis, GOslim:biological_process	9	3	0.3505	1
ER_OVERLOAD_RESPONSE	GO:0006983 ER overload response, GOslim:biological_process	2	2	0.143	1
MITOTIC_CELL_CYCLE_SPINDLE_ASSEMBLY_CHECKPOINT	GO:0007094 mitotic cell cycle spindle assembly checkpoint, GOslim:biological_process	4	1	0.6167	1
HOMOGALACTURONAN_METABOLIC_PROCESS	GO:0010394 homogalacturonan metabolic process, GOslim:biological_process	1	1	0.3186	1
ENERGY_COUPLED_PROTON_TRANSPORT,_DOWN_ELECTROCHEMICAL_GRADIENT	GO:0015985 energy coupled proton transport, down electrochemical gradient, GOslim:biological_process	38	7	0.6912	1
TERPENOID_TRANSPORT	GO:0046865 terpenoid transport, GOslim:biological_process	1	1	0.3186	1
UMP_METABOLIC_PROCESS	GO:0046049 UMP metabolic process, GOslim:biological_process	5	3	0.1499	1
RESPONSE_TO_ALUMINUM_ION	GO:0010044 response to aluminum ion, GOslim:biological_process	19	7	0.1544	1
VIRUS_INDUCED_GENE_SILENCING	GO:0009616 virus induced gene silencing, GOslim:biological_process	102	21	0.5811	1
POSTTRANSCRIPTIONAL_GENE_SILENCING_BY_RNA	GO:0035194 posttranscriptional gene silencing by RNA, GOslim:biological_process	238	47	0.6894	1
COFACTOR_METABOLIC_PROCESS	GO:0051186 cofactor metabolic process, GOslim:biological_process	749	137	0.9495	1
LEAF_SHAPING	GO:0010358 leaf shaping, GOslim:biological_process	7	2	0.4834	1
HOMOGALACTURONAN_BIOSYNTHETIC_PROCESS	GO:0010289 homogalacturonan biosynthetic process, GOslim:biological_process	3	2	0.2115	1
EXTRACELLULAR_POLYSACCHARIDE_BIOSYNTHETIC_PROCESS	GO:0045226 extracellular polysaccharide biosynthetic process, GOslim:biological_process	5	3	0.1499	1
NEUTRAL_LIPID_METABOLIC_PROCESS	GO:0006638 neutral lipid metabolic process, GOslim:biological_process	21	8	0.119	1
MYO-INOSITOL_HEXAKISPHOSPHATE_METABOLIC_PROCESS	GO:0033517 myo-inositol hexakisphosphate metabolic process, GOslim:biological_process	65	13	0.6188	1
VITAMIN_BIOSYNTHETIC_PROCESS	GO:0009110 vitamin biosynthetic process, GOslim:biological_process	77	14	0.7392	1
RNA_EXPORT_FROM_NUCLEUS	GO:0006405 RNA export from nucleus, GOslim:biological_process	68	15	0.4856	1
THIAMINE-CONTAINING_COMPOUND_BIOSYNTHETIC_PROCESS	GO:0042724 thiamine-containing compound biosynthetic process, GOslim:biological_process	10	2	0.6459	1
MODULATION_BY_SYMBIONT_OF_HOST_CELLULAR_PROCESS	GO:0044068 modulation by symbiont of host cellular process, GOslim:biological_process	1	1	0.3186	1
NUCLEOSOME_ASSEMBLY	GO:0006334 nucleosome assembly, GOslim:biological_process	67	19	0.1598	1
STEROID_CATABOLIC_PROCESS	GO:0006706 steroid catabolic process, GOslim:biological_process	2	1	0.4375	1
REGULATION_OF_CYTOKININ_MEDIATED_SIGNALING_PATHWAY	GO:0080036 regulation of cytokinin mediated signaling pathway, GOslim:biological_process	6	1	0.7388	1
PHOSPHATIDYLINOSITOL_BIOSYNTHETIC_PROCESS	GO:0006661 phosphatidylinositol biosynthetic process, GOslim:biological_process	98	9	0.9976	1
POSITIVE_REGULATION_OF_ACTIN_NUCLEATION	GO:0051127 positive regulation of actin nucleation, GOslim:biological_process	4	1	0.6167	1
REGULATION_OF_MRNA_STABILITY	GO:0043488 regulation of mRNA stability, GOslim:biological_process	4	1	0.6167	1
AMIDE_TRANSPORT	GO:0042886 amide transport, GOslim:biological_process	7	2	0.4834	1
INNER_MITOCHONDRIAL_MEMBRANE_ORGANIZATION	GO:0007007 inner mitochondrial membrane organization, GOslim:biological_process	8	1	0.822	1
UDP-GLUCURONATE_METABOLIC_PROCESS	GO:0046398 UDP-glucuronate metabolic process, GOslim:biological_process	5	4	0.0557	1
TRNA_EXPORT_FROM_NUCLEUS	GO:0006409 tRNA export from nucleus, GOslim:biological_process	2	2	0.143	1
POSITIVE_REGULATION_OF_NUCLEOBASE-CONTAINING_COMPOUND_METABOLIC_PROCESS	GO:0045935 positive regulation of nucleobase-containing compound metabolic process, GOslim:biological_process	474	84	0.9428	1
CELLULAR_RESPONSE_TO_CYTOKININ_STIMULUS	GO:0071368 cellular response to cytokinin stimulus, GOslim:biological_process	79	22	0.1544	1
PRIMARY_ROOT_DEVELOPMENT	GO:0080022 primary root development, GOslim:biological_process	20	6	0.2948	1
THIGMOTROPISM	GO:0009652 thigmotropism, GOslim:biological_process	5	3	0.1499	1
HISTONE_LYSINE_DEMETHYLATION	GO:0070076 histone lysine demethylation, GOslim:biological_process	4	1	0.6167	1
ISOPRENOID_CATABOLIC_PROCESS	GO:0008300 isoprenoid catabolic process, GOslim:biological_process	11	3	0.4524	1
CHROMATIN_SILENCING	GO:0006342 chromatin silencing, GOslim:biological_process	241	46	0.7604	1
INDUCED_SYSTEMIC_RESISTANCE,_ETHYLENE_MEDIATED_SIGNALING_PATHWAY	GO:0009866 induced systemic resistance, ethylene mediated signaling pathway, GOslim:biological_process	3	1	0.5357	1
NAD_TRANSPORT	GO:0043132 NAD transport, GOslim:biological_process	3	1	0.5357	1
MEGAGAMETOGENESIS	GO:0009561 megagametogenesis, GOslim:biological_process	187	36	0.7232	1
ZYGOTE_ASYMMETRIC_CELL_DIVISION	GO:0010070 zygote asymmetric cell division, GOslim:biological_process	3	1	0.5357	1
SEXUAL_REPRODUCTION	GO:0019953 sexual reproduction, GOslim:biological_process	245	51	0.5642	1
PROTEIN_POLYUBIQUITINATION	GO:0000209 protein polyubiquitination, GOslim:biological_process	2	1	0.4375	1
APOCAROTENOID_METABOLIC_PROCESS	GO:0043288 apocarotenoid metabolic process, GOslim:biological_process	43	10	0.4483	1
NEGATIVE_REGULATION_OF_SULFUR_METABOLIC_PROCESS	GO:0051175 negative regulation of sulfur metabolic process, GOslim:biological_process	2	1	0.4375	1
FLOWER_CALYX_DEVELOPMENT	GO:0048464 flower calyx development, GOslim:biological_process	78	7	0.9952	1
NUCLEOSIDE_DIPHOSPHATE_METABOLIC_PROCESS	GO:0009132 nucleoside diphosphate metabolic process, GOslim:biological_process	11	3	0.4524	1
RETROGRADE_TRANSPORT,_ENDOSOME_TO_GOLGI	GO:0042147 retrograde transport, endosome to Golgi, GOslim:biological_process	7	2	0.4834	1
CELLULAR_MACROMOLECULAR_COMPLEX_DISASSEMBLY	GO:0034623 cellular macromolecular complex disassembly, GOslim:biological_process	35	8	0.4829	1
REGULATION_OF_POTASSIUM_ION_TRANSPORT	GO:0043266 regulation of potassium ion transport, GOslim:biological_process	3	1	0.5357	1
POSITIVE_REGULATION_BY_ORGANISM_OF_DEFENSE_RESPONSE_OF_OTHER_ORGANISM_INVOLVED_IN_SYMBIOTIC_INTERACTION	GO:0052510 positive regulation by organism of defense response of other organism involved in symbiotic interaction, GOslim:biological_process	6	5	0.0295	1
GLYCOGEN_CATABOLIC_PROCESS	GO:0005980 glycogen catabolic process, GOslim:biological_process	1	1	0.3186	1
RESPONSE_TO_CALCIUM_ION	GO:0051592 response to calcium ion, GOslim:biological_process	12	5	0.1614	1
POSITIVE_REGULATION_OF_MEIOSIS	GO:0045836 positive regulation of meiosis, GOslim:biological_process	4	3	0.1071	1
POLLEN_TUBE_DEVELOPMENT	GO:0048868 pollen tube development, GOslim:biological_process	302	47	0.982	1
POSITIVE_REGULATION_OF_DNA_METABOLIC_PROCESS	GO:0051054 positive regulation of DNA metabolic process, GOslim:biological_process	7	1	0.7844	1
URACIL_TRANSPORT	GO:0015857 uracil transport, GOslim:biological_process	1	1	0.3186	1
NUCLEOTIDE-EXCISION_REPAIR	GO:0006289 nucleotide-excision repair, GOslim:biological_process	35	7	0.6165	1
PROTEIN_IMPORT_INTO_PEROXISOME_MATRIX	GO:0016558 protein import into peroxisome matrix, GOslim:biological_process	94	28	0.0724	1
PLASMA_MEMBRANE_TO_ENDOSOME_TRANSPORT	GO:0048227 plasma membrane to endosome transport, GOslim:biological_process	1	1	0.3186	1
DNA-DEPENDENT_TRANSCRIPTION,_TERMINATION	GO:0006353 DNA-dependent transcription, termination, GOslim:biological_process	4	1	0.6167	1
BASIPETAL_AUXIN_TRANSPORT	GO:0010540 basipetal auxin transport, GOslim:biological_process	23	7	0.2607	1
ALLANTOIN_TRANSPORT	GO:0015720 allantoin transport, GOslim:biological_process	2	1	0.4375	1
SEPAL_DEVELOPMENT	GO:0048442 sepal development, GOslim:biological_process	78	7	0.9952	1
REGULATION_OF_CELL_PROLIFERATION	GO:0042127 regulation of cell proliferation, GOslim:biological_process	116	27	0.3587	1
PYRIMIDINE_DEOXYRIBONUCLEOSIDE_MONOPHOSPHATE_METABOLIC_PROCESS	GO:0009176 pyrimidine deoxyribonucleoside monophosphate metabolic process, GOslim:biological_process	3	1	0.5357	1
EMBRYO_DEVELOPMENT_ENDING_IN_SEED_DORMANCY	GO:0009793 embryo development ending in seed dormancy, GOslim:biological_process	557	118	0.5077	1
AMINO_ACID_TRANSMEMBRANE_TRANSPORT	GO:0003333 amino acid transmembrane transport, GOslim:biological_process	11	3	0.4524	1
SECRETION	GO:0046903 secretion, GOslim:biological_process	60	20	0.0558	1
POSITIVE_REGULATION_OF_PROTEIN_MODIFICATION_PROCESS	GO:0031401 positive regulation of protein modification process, GOslim:biological_process	2	1	0.4375	1
NUCLEOBASE-CONTAINING_SMALL_MOLECULE_BIOSYNTHETIC_PROCESS	GO:0034404 nucleobase-containing small molecule biosynthetic process, GOslim:biological_process	26	9	0.1437	1
POLLEN_TUBE_ADHESION	GO:0009865 pollen tube adhesion, GOslim:biological_process	2	2	0.143	1
POSITIVE_REGULATION_OF_CYTOPLASMIC_MRNA_PROCESSING_BODY_ASSEMBLY	GO:0010606 positive regulation of cytoplasmic mRNA processing body assembly, GOslim:biological_process	1	1	0.3186	1
ORGANELLE_ASSEMBLY	GO:0070925 organelle assembly, GOslim:biological_process	57	10	0.7543	1
SEED_COAT_DEVELOPMENT	GO:0010214 seed coat development, GOslim:biological_process	18	3	0.7359	1
POSITIVE_REGULATION_OF_GROWTH	GO:0045927 positive regulation of growth, GOslim:biological_process	9	3	0.3505	1
MITOCHONDRIAL_ELECTRON_TRANSPORT,_SUCCINATE_TO_UBIQUINONE	GO:0006121 mitochondrial electron transport, succinate to ubiquinone, GOslim:biological_process	7	3	0.2469	1
PLANT-TYPE_CELL_WALL_BIOGENESIS	GO:0009832 plant-type cell wall biogenesis, GOslim:biological_process	144	43	0.0315	1
INTERPHASE_OF_MITOTIC_CELL_CYCLE	GO:0051329 interphase of mitotic cell cycle, GOslim:biological_process	76	8	0.986	1
REGULATION_OF_STARCH_METABOLIC_PROCESS	GO:2000904 regulation of starch metabolic process, GOslim:biological_process	4	1	0.6167	1
HISTONE_H3_ACETYLATION	GO:0043966 histone H3 acetylation, GOslim:biological_process	5	2	0.3523	1
FLAVIN-CONTAINING_COMPOUND_BIOSYNTHETIC_PROCESS	GO:0042727 flavin-containing compound biosynthetic process, GOslim:biological_process	10	1	0.8787	1
RESPONSE_TO_HOST	GO:0075136 response to host, GOslim:biological_process	6	5	0.0295	1
CELLULAR_RESPONSE_TO_RADIATION	GO:0071478 cellular response to radiation, GOslim:biological_process	77	20	0.2406	1
LYSOSOMAL_TRANSPORT	GO:0007041 lysosomal transport, GOslim:biological_process	4	2	0.2822	1
TREHALOSE_METABOLIC_PROCESS	GO:0005991 trehalose metabolic process, GOslim:biological_process	27	7	0.3814	1
OXYGEN_TRANSPORT	GO:0015671 oxygen transport, GOslim:biological_process	3	1	0.5357	1
XYLEM_AND_PHLOEM_PATTERN_FORMATION	GO:0010051 xylem and phloem pattern formation, GOslim:biological_process	97	23	0.3454	1
REGULATION_OF_PROTEIN_SUMOYLATION	GO:0033233 regulation of protein sumoylation, GOslim:biological_process	1	1	0.3186	1
PHRAGMOPLAST_ASSEMBLY	GO:0000914 phragmoplast assembly, GOslim:biological_process	6	1	0.7388	1
BETA-ALANINE_CATABOLIC_PROCESS	GO:0019484 beta-alanine catabolic process, GOslim:biological_process	1	1	0.3186	1
PLASTID_ORGANIZATION	GO:0009657 plastid organization, GOslim:biological_process	398	12	1	1
CYSTEINE_METABOLIC_PROCESS	GO:0006534 cysteine metabolic process, GOslim:biological_process	213	42	0.6855	1
POLYCISTRONIC_MRNA_PROCESSING	GO:0031426 polycistronic mRNA processing, GOslim:biological_process	1	1	0.3186	1
REGULATION_OF_TRANSCRIPTION_FROM_RNA_POLYMERASE_II_PROMOTER	GO:0006357 regulation of transcription from RNA polymerase II promoter, GOslim:biological_process	27	8	0.2579	1
GLYCEROL_TRANSPORT	GO:0015793 glycerol transport, GOslim:biological_process	1	1	0.3186	1
TRNA_AMINOACYLATION_FOR_PROTEIN_TRANSLATION	GO:0006418 tRNA aminoacylation for protein translation, GOslim:biological_process	66	15	0.445	1
INDETERMINATE_INFLORESCENCE_MORPHOGENESIS	GO:0048283 indeterminate inflorescence morphogenesis, GOslim:biological_process	1	1	0.3186	1
MITOTIC_RECOMBINATION	GO:0006312 mitotic recombination, GOslim:biological_process	57	8	0.9004	1
HETEROCYCLE_BIOSYNTHETIC_PROCESS	GO:0018130 heterocycle biosynthetic process, GOslim:biological_process	255	32	0.9989	1
UDP-N-ACETYLGLUCOSAMINE_BIOSYNTHETIC_PROCESS	GO:0006048 UDP-N-acetylglucosamine biosynthetic process, GOslim:biological_process	3	2	0.2115	1
CUTICLE_DEVELOPMENT	GO:0042335 cuticle development, GOslim:biological_process	48	15	0.1239	1
RESPONSE_TO_NUTRIENT	GO:0007584 response to nutrient, GOslim:biological_process	11	3	0.4524	1
REGULATION_OF_PHOSPHORUS_METABOLIC_PROCESS	GO:0051174 regulation of phosphorus metabolic process, GOslim:biological_process	231	52	0.3642	1
MANNOSE_BIOSYNTHETIC_PROCESS	GO:0019307 mannose biosynthetic process, GOslim:biological_process	1	1	0.3186	1
PHOSPHATIDYLETHANOLAMINE_BIOSYNTHETIC_PROCESS	GO:0006646 phosphatidylethanolamine biosynthetic process, GOslim:biological_process	1	1	0.3186	1
GLUCOSYLCERAMIDE_CATABOLIC_PROCESS	GO:0006680 glucosylceramide catabolic process, GOslim:biological_process	4	3	0.1071	1
JASMONIC_ACID_METABOLIC_PROCESS	GO:0009694 jasmonic acid metabolic process, GOslim:biological_process	159	37	0.3265	1
CIRCADIAN_REGULATION_OF_CALCIUM_ION_OSCILLATION	GO:0010617 circadian regulation of calcium ion oscillation, GOslim:biological_process	3	1	0.5357	1
MEIOTIC_CELL_CYCLE	GO:0051321 meiotic cell cycle, GOslim:biological_process	272	55	0.6412	1
PEPTIDE_METABOLIC_PROCESS	GO:0006518 peptide metabolic process, GOslim:biological_process	38	12	0.1504	1
PEROXISOME_FISSION	GO:0016559 peroxisome fission, GOslim:biological_process	10	4	0.2177	1
PRODUCTION_OF_TA-SIRNAS_INVOLVED_IN_RNA_INTERFERENCE	GO:0010267 production of ta-siRNAs involved in RNA interference, GOslim:biological_process	111	23	0.5705	1
LATERAL_ROOT_MORPHOGENESIS	GO:0010102 lateral root morphogenesis, GOslim:biological_process	48	18	0.031	1
ACTIVATION_OF_RAS_GTPASE_ACTIVITY	GO:0032856 activation of Ras GTPase activity, GOslim:biological_process	2	2	0.143	1
RIBONUCLEOSIDE_BIOSYNTHETIC_PROCESS	GO:0042455 ribonucleoside biosynthetic process, GOslim:biological_process	4	2	0.2822	1
PRIMARY_ALCOHOL_METABOLIC_PROCESS	GO:0034308 primary alcohol metabolic process, GOslim:biological_process	6	2	0.4197	1
CHLOROPLAST_LOCALIZATION	GO:0019750 chloroplast localization, GOslim:biological_process	1	1	0.3186	1
NUCLEOLOGENESIS	GO:0017126 nucleologenesis, GOslim:biological_process	1	1	0.3186	1
PYRIMIDINE_NUCLEOSIDE_TRIPHOSPHATE_BIOSYNTHETIC_PROCESS	GO:0009148 pyrimidine nucleoside triphosphate biosynthetic process, GOslim:biological_process	6	2	0.4197	1
ORGANIC_HYDROXY_COMPOUND_TRANSPORT	GO:0015850 organic hydroxy compound transport, GOslim:biological_process	4	2	0.2822	1
STARCH_METABOLIC_PROCESS	GO:0005982 starch metabolic process, GOslim:biological_process	230	33	0.9882	1
AMMONIA_ASSIMILATION_CYCLE	GO:0019676 ammonia assimilation cycle, GOslim:biological_process	4	1	0.6167	1
DTDP-RHAMNOSE_METABOLIC_PROCESS	GO:0046383 dTDP-rhamnose metabolic process, GOslim:biological_process	4	2	0.2822	1
GLUTATHIONE_BIOSYNTHETIC_PROCESS	GO:0006750 glutathione biosynthetic process, GOslim:biological_process	2	1	0.4375	1
GLYCEROL_METABOLIC_PROCESS	GO:0006071 glycerol metabolic process, GOslim:biological_process	37	11	0.2052	1
REGULATION_OF_CARBOHYDRATE_METABOLIC_PROCESS	GO:0006109 regulation of carbohydrate metabolic process, GOslim:biological_process	24	8	0.1827	1
REGULATION_OF_DNA-DEPENDENT_TRANSCRIPTION_IN_RESPONSE_TO_STRESS	GO:0043620 regulation of DNA-dependent transcription in response to stress, GOslim:biological_process	2	1	0.4375	1
FLAVONOL_METABOLIC_PROCESS	GO:0051554 flavonol metabolic process, GOslim:biological_process	9	2	0.5967	1
LIPOATE_METABOLIC_PROCESS	GO:0009106 lipoate metabolic process, GOslim:biological_process	44	2	0.9984	1
REGULATION_OF_AMINE_TRANSPORT	GO:0051952 regulation of amine transport, GOslim:biological_process	7	2	0.4834	1
NUCLEOTIDE-SUGAR_BIOSYNTHETIC_PROCESS	GO:0009226 nucleotide-sugar biosynthetic process, GOslim:biological_process	14	7	0.0593	1
CELLULAR_RESPONSE_TO_LIPID	GO:0071396 cellular response to lipid, GOslim:biological_process	4	2	0.2822	1
HYDROGEN_TRANSPORT	GO:0006818 hydrogen transport, GOslim:biological_process	147	19	0.9876	1
POSITIVE_REGULATION_BY_ORGANISM_OF_INNATE_IMMUNE_RESPONSE_IN_OTHER_ORGANISM_INVOLVED_IN_SYMBIOTIC_INTERACTION	GO:0052305 positive regulation by organism of innate immune response in other organism involved in symbiotic interaction, GOslim:biological_process	6	5	0.0295	1
NEGATIVE_REGULATION_OF_CELLULAR_AMINE_METABOLIC_PROCESS	GO:0033239 negative regulation of cellular amine metabolic process, GOslim:biological_process	2	1	0.4375	1
REGULATION_OF_MERISTEM_GROWTH	GO:0010075 regulation of meristem growth, GOslim:biological_process	166	35	0.5348	1
NEGATIVE_REGULATION_OF_ACTIN_FILAMENT_POLYMERIZATION	GO:0030837 negative regulation of actin filament polymerization, GOslim:biological_process	7	1	0.7844	1
NEGATIVE_REGULATION_OF_ANTHOCYANIN_METABOLIC_PROCESS	GO:0031538 negative regulation of anthocyanin metabolic process, GOslim:biological_process	3	1	0.5357	1
DSRNA_FRAGMENTATION	GO:0031050 dsRNA fragmentation, GOslim:biological_process	143	28	0.6756	1
PHYTOCHELATIN_BIOSYNTHETIC_PROCESS	GO:0046938 phytochelatin biosynthetic process, GOslim:biological_process	2	1	0.4375	1
SHOOT_DEVELOPMENT	GO:0048367 shoot development, GOslim:biological_process	703	159	0.2303	1
MUCILAGE_EXTRUSION_FROM_SEED_COAT	GO:0080001 mucilage extrusion from seed coat, GOslim:biological_process	3	1	0.5357	1
XENOBIOTIC_CATABOLIC_PROCESS	GO:0042178 xenobiotic catabolic process, GOslim:biological_process	4	1	0.6167	1
PYRIMIDINE_NUCLEOBASE_METABOLIC_PROCESS	GO:0006206 pyrimidine nucleobase metabolic process, GOslim:biological_process	9	6	0.0337	1
POSITIVE_REGULATION_OF_MULTICELLULAR_ORGANISMAL_PROCESS	GO:0051240 positive regulation of multicellular organismal process, GOslim:biological_process	11	5	0.1319	1
RESPIRATORY_ELECTRON_TRANSPORT_CHAIN	GO:0022904 respiratory electron transport chain, GOslim:biological_process	48	7	0.8672	1
CHLOROPLAST_FISSION	GO:0010020 chloroplast fission, GOslim:biological_process	19	1	0.9784	1
OLIGOPEPTIDE_TRANSPORT	GO:0006857 oligopeptide transport, GOslim:biological_process	116	34	0.0607	1
OLIGOSACCHARIDE-LIPID_INTERMEDIATE_BIOSYNTHETIC_PROCESS	GO:0006490 oligosaccharide-lipid intermediate biosynthetic process, GOslim:biological_process	1	1	0.3186	1
CELLULAR_RESPONSE_TO_CALCIUM_ION_STARVATION	GO:0072732 cellular response to calcium ion starvation, GOslim:biological_process	1	1	0.3186	1
L-PHENYLALANINE_BIOSYNTHETIC_PROCESS	GO:0009094 L-phenylalanine biosynthetic process, GOslim:biological_process	8	4	0.1424	1
CELLULAR_RESPONSE_TO_INDOLEBUTYRIC_ACID_STIMULUS	GO:0071366 cellular response to indolebutyric acid stimulus, GOslim:biological_process	2	1	0.4375	1
CORTICAL_CYTOSKELETON_ORGANIZATION	GO:0030865 cortical cytoskeleton organization, GOslim:biological_process	24	7	0.29	1
L-ARABINOSE_METABOLIC_PROCESS	GO:0046373 L-arabinose metabolic process, GOslim:biological_process	6	2	0.4197	1
PENTACYCLIC_TRITERPENOID_BIOSYNTHETIC_PROCESS	GO:0019745 pentacyclic triterpenoid biosynthetic process, GOslim:biological_process	41	11	0.2913	1
PROTEIN-DNA_COMPLEX_ASSEMBLY	GO:0065004 protein-DNA complex assembly, GOslim:biological_process	70	20	0.1461	1
RESPONSE_TO_CARBON_DIOXIDE	GO:0010037 response to carbon dioxide, GOslim:biological_process	5	1	0.6836	1
DNA_GEOMETRIC_CHANGE	GO:0032392 DNA geometric change, GOslim:biological_process	13	2	0.7651	1
GLUCOSE_CATABOLIC_PROCESS_TO_D-LACTATE_AND_ETHANOL	GO:0019656 glucose catabolic process to D-lactate and ethanol, GOslim:biological_process	4	1	0.6167	1
NUCLEOBASE-CONTAINING_SMALL_MOLECULE_CATABOLIC_PROCESS	GO:0034656 nucleobase-containing small molecule catabolic process, GOslim:biological_process	18	5	0.3735	1
PHLOEM_GLUCOSINOLATE_LOADING	GO:0090449 phloem glucosinolate loading, GOslim:biological_process	2	2	0.143	1
MRNA_CLEAVAGE	GO:0006379 mRNA cleavage, GOslim:biological_process	7	1	0.7844	1
MUCILAGE_PECTIN_BIOSYNTHETIC_PROCESS	GO:0048358 mucilage pectin biosynthetic process, GOslim:biological_process	1	1	0.3186	1
NUCLEOSIDE_TRIPHOSPHATE_BIOSYNTHETIC_PROCESS	GO:0009142 nucleoside triphosphate biosynthetic process, GOslim:biological_process	79	27	0.0239	1
AROMATIC_AMINO_ACID_TRANSPORT	GO:0015801 aromatic amino acid transport, GOslim:biological_process	1	1	0.3186	1
PURINE_RIBONUCLEOTIDE_CATABOLIC_PROCESS	GO:0009154 purine ribonucleotide catabolic process, GOslim:biological_process	96	20	0.562	1
BEHAVIOR	GO:0007610 behavior, GOslim:biological_process	19	3	0.7651	1
UBIQUINONE_BIOSYNTHETIC_PROCESS	GO:0006744 ubiquinone biosynthetic process, GOslim:biological_process	29	1	0.9968	1
MEMBRANE_LIPID_CATABOLIC_PROCESS	GO:0046466 membrane lipid catabolic process, GOslim:biological_process	10	6	0.0461	1
L-ALANINE_CATABOLIC_PROCESS,_BY_TRANSAMINATION	GO:0019481 L-alanine catabolic process, by transamination, GOslim:biological_process	1	1	0.3186	1
N-GLYCAN_PROCESSING	GO:0006491 N-glycan processing, GOslim:biological_process	6	4	0.0803	1
DEOXYRIBONUCLEOTIDE_METABOLIC_PROCESS	GO:0009262 deoxyribonucleotide metabolic process, GOslim:biological_process	10	2	0.6459	1
LEUKOTRIENE_METABOLIC_PROCESS	GO:0006691 leukotriene metabolic process, GOslim:biological_process	2	2	0.143	1
DOLICHOL_BIOSYNTHETIC_PROCESS	GO:0019408 dolichol biosynthetic process, GOslim:biological_process	16	7	0.0915	1
EMBRYONIC_AXIS_SPECIFICATION	GO:0000578 embryonic axis specification, GOslim:biological_process	10	5	0.1051	1
CELLULAR_RESPONSE_TO_BRASSINOSTEROID_STIMULUS	GO:0071367 cellular response to brassinosteroid stimulus, GOslim:biological_process	38	15	0.0341	1
POSITIVE_REGULATION_OF_TELOMERASE_ACTIVITY	GO:0051973 positive regulation of telomerase activity, GOslim:biological_process	2	1	0.4375	1
LYTIC_VACUOLE_ORGANIZATION	GO:0080171 lytic vacuole organization, GOslim:biological_process	2	1	0.4375	1
REGULATION_OF_CELLULAR_AMINO_ACID_METABOLIC_PROCESS	GO:0006521 regulation of cellular amino acid metabolic process, GOslim:biological_process	8	2	0.5425	1
OXIDATIVE_PHOTOSYNTHETIC_CARBON_PATHWAY	GO:0009854 oxidative photosynthetic carbon pathway, GOslim:biological_process	2	1	0.4375	1
ETHANOLAMINE-CONTAINING_COMPOUND_METABOLIC_PROCESS	GO:0042439 ethanolamine-containing compound metabolic process, GOslim:biological_process	16	5	0.2988	1
PROTEIN_HEXAMERIZATION	GO:0034214 protein hexamerization, GOslim:biological_process	2	1	0.4375	1
DITERPENOID_BIOSYNTHETIC_PROCESS	GO:0016102 diterpenoid biosynthetic process, GOslim:biological_process	55	7	0.933	1
ZINC_ION_TRANSMEMBRANE_TRANSPORT	GO:0071577 zinc ion transmembrane transport, GOslim:biological_process	13	4	0.3438	1
LEUKOTRIENE_BIOSYNTHETIC_PROCESS	GO:0019370 leukotriene biosynthetic process, GOslim:biological_process	2	2	0.143	1
SULFUR_AMINO_ACID_BIOSYNTHETIC_PROCESS	GO:0000097 sulfur amino acid biosynthetic process, GOslim:biological_process	309	74	0.1828	1
PHOSPHATIDYLSERINE_METABOLIC_PROCESS	GO:0006658 phosphatidylserine metabolic process, GOslim:biological_process	2	2	0.143	1
FORMATION_OF_ANATOMICAL_BOUNDARY	GO:0048859 formation of anatomical boundary, GOslim:biological_process	10	2	0.6459	1
INDOLE_GLUCOSINOLATE_BIOSYNTHETIC_PROCESS	GO:0009759 indole glucosinolate biosynthetic process, GOslim:biological_process	6	2	0.4197	1
REGULATION_OF_PROTEIN_KINASE_ACTIVITY	GO:0045859 regulation of protein kinase activity, GOslim:biological_process	89	27	0.0664	1
PROTEIN_LOCALIZATION_TO_ENDOPLASMIC_RETICULUM	GO:0070972 protein localization to endoplasmic reticulum, GOslim:biological_process	13	4	0.3438	1
PROTEIN_PALMITOYLATION	GO:0018345 protein palmitoylation, GOslim:biological_process	3	1	0.5357	1
INDOLALKYLAMINE_CATABOLIC_PROCESS	GO:0046218 indolalkylamine catabolic process, GOslim:biological_process	79	27	0.0239	1
POST-GOLGI_VESICLE-MEDIATED_TRANSPORT	GO:0006892 post-Golgi vesicle-mediated transport, GOslim:biological_process	6	2	0.4197	1
ACTIVATION_OF_MAPK_ACTIVITY_INVOLVED_IN_OSMOSENSORY_SIGNALING_PATHWAY	GO:0000169 activation of MAPK activity involved in osmosensory signaling pathway, GOslim:biological_process	1	1	0.3186	1
PURINE_NUCLEOSIDE_TRIPHOSPHATE_CATABOLIC_PROCESS	GO:0009146 purine nucleoside triphosphate catabolic process, GOslim:biological_process	96	20	0.562	1
DOUBLE-STRAND_BREAK_REPAIR	GO:0006302 double-strand break repair, GOslim:biological_process	109	11	0.9966	1
DROUGHT_RECOVERY	GO:0009819 drought recovery, GOslim:biological_process	4	2	0.2822	1
PYRUVATE_FAMILY_AMINO_ACID_CATABOLIC_PROCESS	GO:0009080 pyruvate family amino acid catabolic process, GOslim:biological_process	1	1	0.3186	1
CELLULAR_MEMBRANE_ORGANIZATION	GO:0016044 cellular membrane organization, GOslim:biological_process	543	131	0.0946	1
CELLULAR_RESPONSE_TO_SUPEROXIDE	GO:0071451 cellular response to superoxide, GOslim:biological_process	12	2	0.7299	1
GLUTAMINYL-TRNA_AMINOACYLATION	GO:0006425 glutaminyl-tRNA aminoacylation, GOslim:biological_process	2	1	0.4375	1
GLUTAMINE_BIOSYNTHETIC_PROCESS	GO:0006542 glutamine biosynthetic process, GOslim:biological_process	7	1	0.7844	1
TELOMERE_ORGANIZATION	GO:0032200 telomere organization, GOslim:biological_process	63	9	0.9013	1
REGULATION_OF_SULFUR_UTILIZATION	GO:0006792 regulation of sulfur utilization, GOslim:biological_process	1	1	0.3186	1
INTERCELLULAR_TRANSPORT	GO:0010496 intercellular transport, GOslim:biological_process	11	1	0.8999	1
PROTEIN_DEMETHYLATION	GO:0006482 protein demethylation, GOslim:biological_process	4	1	0.6167	1
(1->3)-BETA-D-GLUCAN_BIOSYNTHETIC_PROCESS	GO:0006075 (1->3)-beta-D-glucan biosynthetic process, GOslim:biological_process	13	6	0.0986	1
CELLULAR_BIOGENIC_AMINE_BIOSYNTHETIC_PROCESS	GO:0042401 cellular biogenic amine biosynthetic process, GOslim:biological_process	51	14	0.2347	1
DISACCHARIDE_CATABOLIC_PROCESS	GO:0046352 disaccharide catabolic process, GOslim:biological_process	23	8	0.1601	1
PYRIMIDINE_DIMER_REPAIR	GO:0006290 pyrimidine dimer repair, GOslim:biological_process	6	1	0.7388	1
PURINE_NUCLEOSIDE_MONOPHOSPHATE_BIOSYNTHETIC_PROCESS	GO:0009127 purine nucleoside monophosphate biosynthetic process, GOslim:biological_process	16	6	0.1724	1
REGULATION_OF_SEEDLING_DEVELOPMENT	GO:1900140 regulation of seedling development, GOslim:biological_process	4	2	0.2822	1
SPINDLE_ORGANIZATION	GO:0007051 spindle organization, GOslim:biological_process	48	9	0.6829	1
POST-EMBRYONIC_DEVELOPMENT	GO:0009791 post-embryonic development, GOslim:biological_process	2161	491	0.0709	1
GAMETOPHYTE_DEVELOPMENT	GO:0048229 gametophyte development, GOslim:biological_process	524	111	0.5088	1
PROTEIN_GLUTATHIONYLATION	GO:0010731 protein glutathionylation, GOslim:biological_process	5	1	0.6836	1
REGULATION_OF_CYTOSKELETON_ORGANIZATION	GO:0051493 regulation of cytoskeleton organization, GOslim:biological_process	29	4	0.8518	1
PIGMENT_BIOSYNTHETIC_PROCESS	GO:0046148 pigment biosynthetic process, GOslim:biological_process	281	46	0.9578	1
PETAL_MORPHOGENESIS	GO:0048446 petal morphogenesis, GOslim:biological_process	88	5	0.9999	1
DETOXIFICATION_OF_COPPER_ION	GO:0010273 detoxification of copper ion, GOslim:biological_process	1	1	0.3186	1
CHALCONE_BIOSYNTHETIC_PROCESS	GO:0009715 chalcone biosynthetic process, GOslim:biological_process	1	1	0.3186	1
WAX_BIOSYNTHETIC_PROCESS	GO:0010025 wax biosynthetic process, GOslim:biological_process	18	8	0.0696	1
SEED_MATURATION	GO:0010431 seed maturation, GOslim:biological_process	180	43	0.2592	1
DEFENSE_RESPONSE_TO_NEMATODE	GO:0002215 defense response to nematode, GOslim:biological_process	2	2	0.143	1
POSITIVE_REGULATION_OF_GIBBERELLIC_ACID_MEDIATED_SIGNALING_PATHWAY	GO:0009939 positive regulation of gibberellic acid mediated signaling pathway, GOslim:biological_process	6	2	0.4197	1
PLASTID_MEMBRANE_ORGANIZATION	GO:0009668 plastid membrane organization, GOslim:biological_process	198	1	1	1
REGULATION_OF_GENE_EXPRESSION_BY_GENETIC_IMPRINTING	GO:0006349 regulation of gene expression by genetic imprinting, GOslim:biological_process	13	3	0.5469	1
SECRETION_BY_CELL	GO:0032940 secretion by cell, GOslim:biological_process	60	20	0.0558	1
GLUCAN_BIOSYNTHETIC_PROCESS	GO:0009250 glucan biosynthetic process, GOslim:biological_process	313	77	0.1294	1
CELLULAR_GLUCAN_METABOLIC_PROCESS	GO:0006073 cellular glucan metabolic process, GOslim:biological_process	388	99	0.0541	1
REGULATION_OF_CELLULAR_KETONE_METABOLIC_PROCESS	GO:0010565 regulation of cellular ketone metabolic process, GOslim:biological_process	38	11	0.2257	1
CELLULAR_RESPONSE_TO_RED_OR_FAR_RED_LIGHT	GO:0071489 cellular response to red or far red light, GOslim:biological_process	47	14	0.1665	1
SECONDARY_CELL_WALL_BIOGENESIS	GO:0009834 secondary cell wall biogenesis, GOslim:biological_process	38	15	0.0341	1
PHOSPHATIDYLCHOLINE_BIOSYNTHETIC_PROCESS	GO:0006656 phosphatidylcholine biosynthetic process, GOslim:biological_process	5	2	0.3523	1
OXALOACETATE_METABOLIC_PROCESS	GO:0006107 oxaloacetate metabolic process, GOslim:biological_process	2	2	0.143	1
TRANSLATIONAL_FRAMESHIFTING	GO:0006452 translational frameshifting, GOslim:biological_process	3	2	0.2115	1
DETECTION_OF_NUTRIENT	GO:0009594 detection of nutrient, GOslim:biological_process	1	1	0.3186	1
ANATOMICAL_STRUCTURE_HOMEOSTASIS	GO:0060249 anatomical structure homeostasis, GOslim:biological_process	64	9	0.9097	1
REGULATION_OF_SULFUR_AMINO_ACID_METABOLIC_PROCESS	GO:0031335 regulation of sulfur amino acid metabolic process, GOslim:biological_process	5	2	0.3523	1
FATTY_ACID_ELONGATION	GO:0030497 fatty acid elongation, GOslim:biological_process	10	3	0.4021	1
ENERGY_RESERVE_METABOLIC_PROCESS	GO:0006112 energy reserve metabolic process, GOslim:biological_process	2	1	0.4375	1
TETRATERPENOID_METABOLIC_PROCESS	GO:0016108 tetraterpenoid metabolic process, GOslim:biological_process	110	9	0.9994	1
2'-DEOXYRIBONUCLEOTIDE_METABOLIC_PROCESS	GO:0009394 2'-deoxyribonucleotide metabolic process, GOslim:biological_process	7	1	0.7844	1
PEPTIDYL-TYROSINE_PHOSPHORYLATION	GO:0018108 peptidyl-tyrosine phosphorylation, GOslim:biological_process	1	1	0.3186	1
GLYCINE_BIOSYNTHETIC_PROCESS	GO:0006545 glycine biosynthetic process, GOslim:biological_process	3	1	0.5357	1
CELLULAR_RESPONSE_TO_BLUE_LIGHT	GO:0071483 cellular response to blue light, GOslim:biological_process	19	9	0.0432	1
NEGATIVE_REGULATION_OF_AUTOPHAGY	GO:0010507 negative regulation of autophagy, GOslim:biological_process	3	2	0.2115	1
GLYCOSINOLATE_BIOSYNTHETIC_PROCESS	GO:0019758 glycosinolate biosynthetic process, GOslim:biological_process	172	34	0.6681	1
CELLULAR_PROTEIN_COMPLEX_ASSEMBLY	GO:0043623 cellular protein complex assembly, GOslim:biological_process	502	119	0.1403	1
CELLULAR_RESPONSE_TO_FAR_RED_LIGHT	GO:0071490 cellular response to far red light, GOslim:biological_process	5	2	0.3523	1
NUCLEOTIDE-EXCISION_REPAIR,_DNA_INCISION,_5'-TO_LESION	GO:0006296 nucleotide-excision repair, DNA incision, 5'-to lesion, GOslim:biological_process	1	1	0.3186	1
DITERPENOID_CATABOLIC_PROCESS	GO:0016103 diterpenoid catabolic process, GOslim:biological_process	6	1	0.7388	1
JASMONIC_ACID_AND_ETHYLENE-DEPENDENT_SYSTEMIC_RESISTANCE,_ETHYLENE_MEDIATED_SIGNALING_PATHWAY	GO:0009871 jasmonic acid and ethylene-dependent systemic resistance, ethylene mediated signaling pathway, GOslim:biological_process	4	4	0.0358	1
REGULATION_OF_PROTEIN_PHOSPHORYLATION	GO:0001932 regulation of protein phosphorylation, GOslim:biological_process	3	2	0.2115	1
NUCLEOBASE-CONTAINING_SMALL_MOLECULE_METABOLIC_PROCESS	GO:0055086 nucleobase-containing small molecule metabolic process, GOslim:biological_process	726	173	0.0834	1
RESPONSE_TO_FLOODING	GO:0009413 response to flooding, GOslim:biological_process	2	1	0.4375	1
XYLOGALACTURONAN_METABOLIC_PROCESS	GO:0010398 xylogalacturonan metabolic process, GOslim:biological_process	1	1	0.3186	1
PLANT-TYPE_CELL_WALL_ORGANIZATION	GO:0009664 plant-type cell wall organization, GOslim:biological_process	365	81	0.3643	1
TYROSINE_METABOLIC_PROCESS	GO:0006570 tyrosine metabolic process, GOslim:biological_process	8	2	0.5425	1
PROTEIN_DENEDDYLATION	GO:0000338 protein deneddylation, GOslim:biological_process	101	28	0.1245	1
RNA_INTERFERENCE	GO:0016246 RNA interference, GOslim:biological_process	184	36	0.6918	1
LYSINE_BIOSYNTHETIC_PROCESS	GO:0009085 lysine biosynthetic process, GOslim:biological_process	15	2	0.8238	1
LEAF_VASCULAR_TISSUE_PATTERN_FORMATION	GO:0010305 leaf vascular tissue pattern formation, GOslim:biological_process	26	6	0.495	1
REGULATION_OF_PROTEIN_CATABOLIC_PROCESS	GO:0042176 regulation of protein catabolic process, GOslim:biological_process	11	7	0.0261	1
RNA_SECONDARY_STRUCTURE_UNWINDING	GO:0010501 RNA secondary structure unwinding, GOslim:biological_process	2	1	0.4375	1
DISACCHARIDE_TRANSPORT	GO:0015766 disaccharide transport, GOslim:biological_process	15	5	0.2623	1
RELEASE_OF_SEED_FROM_DORMANCY	GO:0048838 release of seed from dormancy, GOslim:biological_process	3	2	0.2115	1
SEPAL_VASCULAR_TISSUE_PATTERN_FORMATION	GO:0080057 sepal vascular tissue pattern formation, GOslim:biological_process	1	1	0.3186	1
REGULATION_OF_PROTEIN_METABOLIC_PROCESS	GO:0051246 regulation of protein metabolic process, GOslim:biological_process	234	50	0.4971	1
RRNA_METHYLATION	GO:0031167 rRNA methylation, GOslim:biological_process	9	1	0.8531	1
INOSITOL_BIOSYNTHETIC_PROCESS	GO:0006021 inositol biosynthetic process, GOslim:biological_process	67	14	0.5616	1
DNA_REPLICATION_INITIATION	GO:0006270 DNA replication initiation, GOslim:biological_process	66	4	0.9991	1
PATHOGEN-ASSOCIATED_MOLECULAR_PATTERN_DEPENDENT_MODULATION_BY_ORGANISM_OF_INNATE_IMMUNE_RESPONSE_IN_OTHER_ORGANISM_INVOLVED_IN_SYMBIOTIC_INTERACTION	GO:0052308 pathogen-associated molecular pattern dependent modulation by organism of innate immune response in other organism involved in symbiotic interaction, GOslim:biological_process	6	5	0.0295	1
REGULATION_OF_TRANSLATIONAL_ELONGATION	GO:0006448 regulation of translational elongation, GOslim:biological_process	6	2	0.4197	1
NEGATIVE_REGULATION_OF_HYDROLASE_ACTIVITY	GO:0051346 negative regulation of hydrolase activity, GOslim:biological_process	11	2	0.6902	1
DISACCHARIDE_METABOLIC_PROCESS	GO:0005984 disaccharide metabolic process, GOslim:biological_process	221	35	0.9572	1
PLASMODESMATA-MEDIATED_INTERCELLULAR_TRANSPORT	GO:0010497 plasmodesmata-mediated intercellular transport, GOslim:biological_process	9	1	0.8531	1
REGULATION_OF_DEFENSE_RESPONSE_TO_BACTERIUM	GO:1900424 regulation of defense response to bacterium, GOslim:biological_process	2	2	0.143	1
GLYCOSINOLATE_CATABOLIC_PROCESS	GO:0019759 glycosinolate catabolic process, GOslim:biological_process	14	6	0.121	1
ENDOMEMBRANE_SYSTEM_ORGANIZATION	GO:0010256 endomembrane system organization, GOslim:biological_process	4	3	0.1071	1
DRUG_TRANSPORT	GO:0015893 drug transport, GOslim:biological_process	74	23	0.0717	1
DNA_METHYLATION_ON_CYTOSINE	GO:0032776 DNA methylation on cytosine, GOslim:biological_process	9	1	0.8531	1
FLOWER_MORPHOGENESIS	GO:0048439 flower morphogenesis, GOslim:biological_process	68	12	0.7612	1
POSITIVE_REGULATION_OF_TRICHOBLAST_FATE_SPECIFICATION	GO:0010063 positive regulation of trichoblast fate specification, GOslim:biological_process	2	1	0.4375	1
COTRANSLATIONAL_PROTEIN_TARGETING_TO_MEMBRANE	GO:0006613 cotranslational protein targeting to membrane, GOslim:biological_process	12	3	0.5008	1
HISTONE_H3-K9_METHYLATION	GO:0051567 histone H3-K9 methylation, GOslim:biological_process	180	32	0.8408	1
SERINE_FAMILY_AMINO_ACID_CATABOLIC_PROCESS	GO:0009071 serine family amino acid catabolic process, GOslim:biological_process	55	5	0.9861	1
MEMBRANE_BUDDING	GO:0006900 membrane budding, GOslim:biological_process	17	6	0.2009	1
POSITIVE_REGULATION_OF_CELL_CYCLE	GO:0045787 positive regulation of cell cycle, GOslim:biological_process	20	2	0.9169	1
RESPONSE_TO_SUPEROXIDE	GO:0000303 response to superoxide, GOslim:biological_process	44	17	0.0291	1
CHROMATIN_ASSEMBLY_OR_DISASSEMBLY	GO:0006333 chromatin assembly or disassembly, GOslim:biological_process	124	32	0.1817	1
TRICHOME_BRANCHING	GO:0010091 trichome branching, GOslim:biological_process	25	7	0.3201	1
EMBRYO_SAC_EGG_CELL_DIFFERENTIATION	GO:0009560 embryo sac egg cell differentiation, GOslim:biological_process	139	28	0.624	1
LOW_AFFINITY_NITRATE_TRANSPORT	GO:0080055 low affinity nitrate transport, GOslim:biological_process	2	1	0.4375	1
PUTRESCINE_METABOLIC_PROCESS	GO:0009445 putrescine metabolic process, GOslim:biological_process	4	2	0.2822	1
GLYCEROL-3-PHOSPHATE_TRANSPORT	GO:0015794 glycerol-3-phosphate transport, GOslim:biological_process	1	1	0.3186	1
REGULATION_OF_AMINO_ACID_EXPORT	GO:0080143 regulation of amino acid export, GOslim:biological_process	7	2	0.4834	1
PURINE_RIBONUCLEOSIDE_TRIPHOSPHATE_CATABOLIC_PROCESS	GO:0009207 purine ribonucleoside triphosphate catabolic process, GOslim:biological_process	96	20	0.562	1
BIOTIN_BIOSYNTHETIC_PROCESS	GO:0009102 biotin biosynthetic process, GOslim:biological_process	3	1	0.5357	1
PROTEIN_TARGETING_TO_PEROXISOME	GO:0006625 protein targeting to peroxisome, GOslim:biological_process	96	28	0.0855	1
MRNA_STABILIZATION	GO:0048255 mRNA stabilization, GOslim:biological_process	4	1	0.6167	1
CELLULAR_MANGANESE_ION_HOMEOSTASIS	GO:0030026 cellular manganese ion homeostasis, GOslim:biological_process	4	2	0.2822	1
REGULATION_OF_BRASSINOSTEROID_BIOSYNTHETIC_PROCESS	GO:0010422 regulation of brassinosteroid biosynthetic process, GOslim:biological_process	2	1	0.4375	1
HISTONE_LYSINE_METHYLATION	GO:0034968 histone lysine methylation, GOslim:biological_process	242	48	0.6808	1
AUXIN_TRANSPORT	GO:0060918 auxin transport, GOslim:biological_process	99	29	0.0785	1
NEGATIVE_REGULATION_OF_RESPONSE_TO_BIOTIC_STIMULUS	GO:0002832 negative regulation of response to biotic stimulus, GOslim:biological_process	3	1	0.5357	1
PHOSPHATIDYLGLYCEROL_METABOLIC_PROCESS	GO:0046471 phosphatidylglycerol metabolic process, GOslim:biological_process	64	11	0.781	1
CLEAVAGE_INVOLVED_IN_RRNA_PROCESSING	GO:0000469 cleavage involved in rRNA processing, GOslim:biological_process	18	2	0.8872	1
PEPTIDYL-PROLINE_MODIFICATION	GO:0018208 peptidyl-proline modification, GOslim:biological_process	35	13	0.0639	1
PRODUCTION_OF_MIRNAS_INVOLVED_IN_GENE_SILENCING_BY_MIRNA	GO:0035196 production of miRNAs involved in gene silencing by miRNA, GOslim:biological_process	130	25	0.6999	1
AMYLOPLAST_ORGANIZATION	GO:0009660 amyloplast organization, GOslim:biological_process	3	3	0.0701	1
PYRIMIDINE_NUCLEOTIDE_SALVAGE	GO:0032262 pyrimidine nucleotide salvage, GOslim:biological_process	2	1	0.4375	1
DEADENYLATION-INDEPENDENT_DECAPPING_OF_NUCLEAR-TRANSCRIBED_MRNA	GO:0031087 deadenylation-independent decapping of nuclear-transcribed mRNA, GOslim:biological_process	5	4	0.0557	1
SYNAPSIS	GO:0007129 synapsis, GOslim:biological_process	88	10	0.984	1
CELLULAR_PROCESS_REGULATING_HOST_CELL_CYCLE_IN_RESPONSE_TO_VIRUS	GO:0060154 cellular process regulating host cell cycle in response to virus, GOslim:biological_process	1	1	0.3186	1
CELLULAR_NITROGEN_COMPOUND_CATABOLIC_PROCESS	GO:0044270 cellular nitrogen compound catabolic process, GOslim:biological_process	88	11	0.9698	1
REGULATION_OF_RNA_SPLICING	GO:0043484 regulation of RNA splicing, GOslim:biological_process	6	2	0.4197	1
REGULATION_OF_HYDROLASE_ACTIVITY	GO:0051336 regulation of hydrolase activity, GOslim:biological_process	57	20	0.039	1
CELLULAR_RESPONSE_TO_POTASSIUM_ION_STARVATION	GO:0051365 cellular response to potassium ion starvation, GOslim:biological_process	2	1	0.4375	1
PYRIMIDINE_DEOXYRIBONUCLEOTIDE_BIOSYNTHETIC_PROCESS	GO:0009221 pyrimidine deoxyribonucleotide biosynthetic process, GOslim:biological_process	4	1	0.6167	1
LYSINE_METABOLIC_PROCESS	GO:0006553 lysine metabolic process, GOslim:biological_process	16	2	0.8478	1
MONOSACCHARIDE_TRANSPORT	GO:0015749 monosaccharide transport, GOslim:biological_process	12	3	0.5008	1
NITRILE_METABOLIC_PROCESS	GO:0050898 nitrile metabolic process, GOslim:biological_process	7	2	0.4834	1
TUBULIN_COMPLEX_ASSEMBLY	GO:0007021 tubulin complex assembly, GOslim:biological_process	6	2	0.4197	1
POSITIVE_REGULATION_BY_ORGANISM_OF_IMMUNE_RESPONSE_OF_OTHER_ORGANISM_INVOLVED_IN_SYMBIOTIC_INTERACTION	GO:0052555 positive regulation by organism of immune response of other organism involved in symbiotic interaction, GOslim:biological_process	6	5	0.0295	1
ACETYL-COA_BIOSYNTHETIC_PROCESS_FROM_PYRUVATE	GO:0006086 acetyl-CoA biosynthetic process from pyruvate, GOslim:biological_process	5	2	0.3523	1
POSTTRANSLATIONAL_PROTEIN_TARGETING_TO_MEMBRANE,_TRANSLOCATION	GO:0031204 posttranslational protein targeting to membrane, translocation, GOslim:biological_process	1	1	0.3186	1
REGULATION_OF_TRANSCRIPTION_FROM_RNA_POLYMERASE_III_PROMOTER	GO:0006359 regulation of transcription from RNA polymerase III promoter, GOslim:biological_process	1	1	0.3186	1
NUCLEOSIDE_CATABOLIC_PROCESS	GO:0009164 nucleoside catabolic process, GOslim:biological_process	14	2	0.7963	1
DTDP-RHAMNOSE_BIOSYNTHETIC_PROCESS	GO:0019305 dTDP-rhamnose biosynthetic process, GOslim:biological_process	4	2	0.2822	1
CITRATE_TRANSPORT	GO:0015746 citrate transport, GOslim:biological_process	3	1	0.5357	1
PURINE_RIBONUCLEOTIDE_TRANSPORT	GO:0015868 purine ribonucleotide transport, GOslim:biological_process	6	1	0.7388	1
TRNA_PROCESSING	GO:0008033 tRNA processing, GOslim:biological_process	60	7	0.9605	1
CYTOKINETIC_PROCESS	GO:0032506 cytokinetic process, GOslim:biological_process	26	4	0.7935	1
NEGATIVE_REGULATION_OF_MICROTUBULE_POLYMERIZATION	GO:0031115 negative regulation of microtubule polymerization, GOslim:biological_process	2	1	0.4375	1
ASPARTATE_TRANSPORT	GO:0015810 aspartate transport, GOslim:biological_process	1	1	0.3186	1
UNSATURATED_FATTY_ACID_METABOLIC_PROCESS	GO:0033559 unsaturated fatty acid metabolic process, GOslim:biological_process	71	8	0.9757	1
NEGATIVE_REGULATION_OF_KINASE_ACTIVITY	GO:0033673 negative regulation of kinase activity, GOslim:biological_process	43	8	0.6865	1
MAPK_CASCADE_INVOLVED_IN_OSMOSENSORY_SIGNALING_PATHWAY	GO:0000161 MAPK cascade involved in osmosensory signaling pathway, GOslim:biological_process	1	1	0.3186	1
REGULATION_OF_RAB_PROTEIN_SIGNAL_TRANSDUCTION	GO:0032483 regulation of Rab protein signal transduction, GOslim:biological_process	23	10	0.0498	1
REGULATION_OF_PEROXISOME_SIZE	GO:0044375 regulation of peroxisome size, GOslim:biological_process	2	1	0.4375	1
REGULATION_OF_STEROID_METABOLIC_PROCESS	GO:0019218 regulation of steroid metabolic process, GOslim:biological_process	2	1	0.4375	1
REGULATION_OF_PHOTORESPIRATION	GO:0080093 regulation of photorespiration, GOslim:biological_process	2	1	0.4375	1
THYLAKOID_MEMBRANE_ORGANIZATION	GO:0010027 thylakoid membrane organization, GOslim:biological_process	198	1	1	1
RIBONUCLEOTIDE_METABOLIC_PROCESS	GO:0009259 ribonucleotide metabolic process, GOslim:biological_process	323	87	0.0273	1
REGULATION_OF_JASMONIC_ACID_METABOLIC_PROCESS	GO:0080140 regulation of jasmonic acid metabolic process, GOslim:biological_process	4	1	0.6167	1
REGULATION_OF_COFACTOR_METABOLIC_PROCESS	GO:0051193 regulation of cofactor metabolic process, GOslim:biological_process	18	3	0.7359	1
GLUTAMINE_FAMILY_AMINO_ACID_CATABOLIC_PROCESS	GO:0009065 glutamine family amino acid catabolic process, GOslim:biological_process	22	7	0.2322	1
IMMUNE_RESPONSE-REGULATING_CELL_SURFACE_RECEPTOR_SIGNALING_PATHWAY	GO:0002768 immune response-regulating cell surface receptor signaling pathway, GOslim:biological_process	1	1	0.3186	1
RRNA_MODIFICATION	GO:0000154 rRNA modification, GOslim:biological_process	74	3	0.9999	1
INFLORESCENCE_MORPHOGENESIS	GO:0048281 inflorescence morphogenesis, GOslim:biological_process	4	2	0.2822	1
QUINONE_COFACTOR_METABOLIC_PROCESS	GO:0042375 quinone cofactor metabolic process, GOslim:biological_process	40	2	0.9969	1
NEGATIVE_REGULATION_OF_BINDING	GO:0051100 negative regulation of binding, GOslim:biological_process	6	1	0.7388	1
PYRIMIDINE_RIBONUCLEOSIDE_TRIPHOSPHATE_BIOSYNTHETIC_PROCESS	GO:0009209 pyrimidine ribonucleoside triphosphate biosynthetic process, GOslim:biological_process	6	2	0.4197	1
ANTHOCYANIN_ACCUMULATION_IN_TISSUES_IN_RESPONSE_TO_UV_LIGHT	GO:0043481 anthocyanin accumulation in tissues in response to UV light, GOslim:biological_process	113	33	0.0659	1
SOMATIC_CELL_DNA_RECOMBINATION	GO:0016444 somatic cell DNA recombination, GOslim:biological_process	32	1	0.9982	1
REGULATION_OF_LIGNIN_BIOSYNTHETIC_PROCESS	GO:1901141 regulation of lignin biosynthetic process, GOslim:biological_process	2	2	0.143	1
SEED_MORPHOGENESIS	GO:0048317 seed morphogenesis, GOslim:biological_process	4	2	0.2822	1
REGULATION_OF_POSTTRANSCRIPTIONAL_GENE_SILENCING	GO:0060147 regulation of posttranscriptional gene silencing, GOslim:biological_process	3	1	0.5357	1
NUCLEOBASE-CONTAINING_COMPOUND_TRANSPORT	GO:0015931 nucleobase-containing compound transport, GOslim:biological_process	238	58	0.1834	1
CAROTENE_METABOLIC_PROCESS	GO:0016119 carotene metabolic process, GOslim:biological_process	12	1	0.9174	1
GLYCEROPHOSPHATE_SHUTTLE	GO:0006127 glycerophosphate shuttle, GOslim:biological_process	1	1	0.3186	1
MEIOTIC_CHROMOSOME_SEPARATION	GO:0051307 meiotic chromosome separation, GOslim:biological_process	8	2	0.5425	1
PEPTIDE_CATABOLIC_PROCESS	GO:0043171 peptide catabolic process, GOslim:biological_process	4	2	0.2822	1
CELLULAR_RESPONSE_TO_DSRNA	GO:0071359 cellular response to dsRNA, GOslim:biological_process	143	28	0.6756	1
POSITIVE_REGULATION_OF_TRANSCRIPTION_FROM_RNA_POLYMERASE_II_PROMOTER_INVOLVED_IN_UNFOLDED_PROTEIN_RESPONSE	GO:0006990 positive regulation of transcription from RNA polymerase II promoter involved in unfolded protein response, GOslim:biological_process	1	1	0.3186	1
PROTEIN_DEPHOSPHORYLATION	GO:0006470 protein dephosphorylation, GOslim:biological_process	215	46	0.496	1
REGULATION_OF_ACTIN_CYTOSKELETON_ORGANIZATION	GO:0032956 regulation of actin cytoskeleton organization, GOslim:biological_process	22	3	0.8371	1
C-TERMINAL_PROTEIN_METHYLATION	GO:0006481 C-terminal protein methylation, GOslim:biological_process	3	1	0.5357	1
SODIUM_ION_TRANSPORT	GO:0006814 sodium ion transport, GOslim:biological_process	35	8	0.4829	1
PYRIMIDINE_NUCLEOBASE_TRANSPORT	GO:0015855 pyrimidine nucleobase transport, GOslim:biological_process	1	1	0.3186	1
NICOTINAMIDE_NUCLEOTIDE_METABOLIC_PROCESS	GO:0046496 nicotinamide nucleotide metabolic process, GOslim:biological_process	212	30	0.9876	1
REGULATION_OF_CELLULAR_DEFENSE_RESPONSE	GO:0010185 regulation of cellular defense response, GOslim:biological_process	4	2	0.2822	1
PHLOEM_SUCROSE_LOADING	GO:0009915 phloem sucrose loading, GOslim:biological_process	3	2	0.2115	1
REGULATION_OF_HORMONE_METABOLIC_PROCESS	GO:0032350 regulation of hormone metabolic process, GOslim:biological_process	7	2	0.4834	1
PLASTID_LOCALIZATION	GO:0051644 plastid localization, GOslim:biological_process	104	1	1	1
POSITIVE_REGULATION_OF_RESPONSE_TO_NUTRIENT_LEVELS	GO:0032109 positive regulation of response to nutrient levels, GOslim:biological_process	3	2	0.2115	1
CYTOKININ_MEDIATED_SIGNALING_PATHWAY	GO:0009736 cytokinin mediated signaling pathway, GOslim:biological_process	78	22	0.1432	1
GLYCOSIDE_METABOLIC_PROCESS	GO:0016137 glycoside metabolic process, GOslim:biological_process	268	64	0.2079	1
RESPONSE_TO_MOLECULE_OF_FUNGAL_ORIGIN	GO:0002238 response to molecule of fungal origin, GOslim:biological_process	38	13	0.0958	1
MITOCHONDRIAL_RESPIRATORY_CHAIN_COMPLEX_IV_ASSEMBLY	GO:0033617 mitochondrial respiratory chain complex IV assembly, GOslim:biological_process	1	1	0.3186	1
NEGATIVE_REGULATION_OF_PROTEIN_MODIFICATION_PROCESS	GO:0031400 negative regulation of protein modification process, GOslim:biological_process	5	2	0.3523	1
REGULATION_OF_CIRCADIAN_RHYTHM	GO:0042752 regulation of circadian rhythm, GOslim:biological_process	46	8	0.7482	1
GLYCOSIDE_CATABOLIC_PROCESS	GO:0016139 glycoside catabolic process, GOslim:biological_process	25	10	0.0713	1
ALKYL_CAFFEATE_ESTER_BIOSYNTHETIC_PROCESS	GO:0090431 alkyl caffeate ester biosynthetic process, GOslim:biological_process	1	1	0.3186	1
PHOTOSYSTEM_I_STABILIZATION	GO:0042550 photosystem I stabilization, GOslim:biological_process	3	1	0.5357	1
METAL_ION_HOMEOSTASIS	GO:0055065 metal ion homeostasis, GOslim:biological_process	54	17	0.1022	1
POSITIVE_REGULATION_OF_SIGNAL_TRANSDUCTION	GO:0009967 positive regulation of signal transduction, GOslim:biological_process	27	10	0.0978	1
INNATE_IMMUNE_RESPONSE_ACTIVATING_CELL_SURFACE_RECEPTOR_SIGNALING_PATHWAY	GO:0002220 innate immune response activating cell surface receptor signaling pathway, GOslim:biological_process	1	1	0.3186	1
DETECTION_OF_ETHYLENE_STIMULUS	GO:0009727 detection of ethylene stimulus, GOslim:biological_process	3	2	0.2115	1
RESPONSE_TO_GAMMA_RADIATION	GO:0010332 response to gamma radiation, GOslim:biological_process	75	16	0.53	1
GLUCOSAMINE_BIOSYNTHETIC_PROCESS	GO:0006042 glucosamine biosynthetic process, GOslim:biological_process	4	3	0.1071	1
GENE_EXPRESSION	GO:0010467 gene expression, GOslim:biological_process	4732	837	1	1
ADENINE_METABOLIC_PROCESS	GO:0046083 adenine metabolic process, GOslim:biological_process	6	1	0.7388	1
POSITIVE_REGULATION_OF_DNA_ENDOREDUPLICATION	GO:0032877 positive regulation of DNA endoreduplication, GOslim:biological_process	3	1	0.5357	1
POSITIVE_REGULATION_OF_TRANSCRIPTION,_DNA-DEPENDENT	GO:0045893 positive regulation of transcription, DNA-dependent, GOslim:biological_process	462	80	0.9596	1
RHAMNOGALACTURONAN_I_SIDE_CHAIN_METABOLIC_PROCESS	GO:0010400 rhamnogalacturonan I side chain metabolic process, GOslim:biological_process	1	1	0.3186	1
MACROMOLECULAR_COMPLEX_SUBUNIT_ORGANIZATION	GO:0043933 macromolecular complex subunit organization, GOslim:biological_process	691	166	0.0745	1
INOSINE_CATABOLIC_PROCESS	GO:0006148 inosine catabolic process, GOslim:biological_process	2	2	0.143	1
GLYCEROLIPID_METABOLIC_PROCESS	GO:0046486 glycerolipid metabolic process, GOslim:biological_process	262	59	0.3518	1
RESPONSE_TO_X-RAY	GO:0010165 response to X-ray, GOslim:biological_process	4	1	0.6167	1
NITRIC_OXIDE_BIOSYNTHETIC_PROCESS	GO:0006809 nitric oxide biosynthetic process, GOslim:biological_process	5	2	0.3523	1
REGULATION_OF_IMMUNE_EFFECTOR_PROCESS	GO:0002697 regulation of immune effector process, GOslim:biological_process	4	4	0.0358	1
PORPHYRIN-CONTAINING_COMPOUND_METABOLIC_PROCESS	GO:0006778 porphyrin-containing compound metabolic process, GOslim:biological_process	225	18	1	1
STOMATAL_CLOSURE	GO:0090332 stomatal closure, GOslim:biological_process	6	2	0.4197	1
GLYCINE_CATABOLIC_PROCESS	GO:0006546 glycine catabolic process, GOslim:biological_process	53	5	0.982	1
REGULATION_OF_ROOT_DEVELOPMENT	GO:2000280 regulation of root development, GOslim:biological_process	4	2	0.2822	1
CHLOROPHYLL_CATABOLIC_PROCESS	GO:0015996 chlorophyll catabolic process, GOslim:biological_process	58	6	0.9768	1
IMP_BIOSYNTHETIC_PROCESS	GO:0006188 IMP biosynthetic process, GOslim:biological_process	11	4	0.2586	1
CELLULAR_AMIDE_METABOLIC_PROCESS	GO:0043603 cellular amide metabolic process, GOslim:biological_process	222	31	0.9908	1
5-CARBAMOYLMETHYLURIDINE_METABOLIC_PROCESS	GO:0080178 5-carbamoylmethyluridine metabolic process, GOslim:biological_process	2	2	0.143	1
REGULATION_OF_ENDOPEPTIDASE_ACTIVITY	GO:0052548 regulation of endopeptidase activity, GOslim:biological_process	10	2	0.6459	1
REGULATION_OF_PHOTOMORPHOGENESIS	GO:0010099 regulation of photomorphogenesis, GOslim:biological_process	25	5	0.6198	1
IMP_METABOLIC_PROCESS	GO:0046040 IMP metabolic process, GOslim:biological_process	11	4	0.2586	1
MALTOSE_METABOLIC_PROCESS	GO:0000023 maltose metabolic process, GOslim:biological_process	152	13	0.9999	1
CELLULAR_MACROMOLECULAR_COMPLEX_ASSEMBLY	GO:0034622 cellular macromolecular complex assembly, GOslim:biological_process	590	141	0.1024	1
DIAMINOPIMELATE_METABOLIC_PROCESS	GO:0046451 diaminopimelate metabolic process, GOslim:biological_process	15	2	0.8238	1
URACIL_METABOLIC_PROCESS	GO:0019860 uracil metabolic process, GOslim:biological_process	4	3	0.1071	1
NEGATIVE_REGULATION_OF_PLANT-TYPE_HYPERSENSITIVE_RESPONSE	GO:0034051 negative regulation of plant-type hypersensitive response, GOslim:biological_process	3	2	0.2115	1
DEOXYRIBONUCLEOTIDE_BIOSYNTHETIC_PROCESS	GO:0009263 deoxyribonucleotide biosynthetic process, GOslim:biological_process	7	1	0.7844	1
GLUCURONOXYLAN_BIOSYNTHETIC_PROCESS	GO:0010417 glucuronoxylan biosynthetic process, GOslim:biological_process	12	7	0.0353	1
REGULATION_OF_JASMONIC_ACID_BIOSYNTHETIC_PROCESS	GO:0080141 regulation of jasmonic acid biosynthetic process, GOslim:biological_process	3	1	0.5357	1
URACIL_CATABOLIC_PROCESS	GO:0006212 uracil catabolic process, GOslim:biological_process	3	3	0.0701	1
NUCLEOSIDE_TRIPHOSPHATE_METABOLIC_PROCESS	GO:0009141 nucleoside triphosphate metabolic process, GOslim:biological_process	165	43	0.1289	1
ROOT_HAIR_INITIATION	GO:0048766 root hair initiation, GOslim:biological_process	6	5	0.0295	1
POSITIVE_REGULATION_OF_PROTEIN_METABOLIC_PROCESS	GO:0051247 positive regulation of protein metabolic process, GOslim:biological_process	26	9	0.1437	1
PROTEIN_DEGLYCOSYLATION	GO:0006517 protein deglycosylation, GOslim:biological_process	2	1	0.4375	1
GLUTAMATE_METABOLIC_PROCESS	GO:0006536 glutamate metabolic process, GOslim:biological_process	22	9	0.0777	1
CELLULAR_RESPONSE_TO_POTASSIUM_ION	GO:0035865 cellular response to potassium ion, GOslim:biological_process	2	1	0.4375	1
ATP_SYNTHESIS_COUPLED_ELECTRON_TRANSPORT	GO:0042773 ATP synthesis coupled electron transport, GOslim:biological_process	34	5	0.8347	1
GLUTAMINE_FAMILY_AMINO_ACID_METABOLIC_PROCESS	GO:0009064 glutamine family amino acid metabolic process, GOslim:biological_process	57	14	0.3531	1
GLUCOSE-6-PHOSPHATE_TRANSPORT	GO:0015760 glucose-6-phosphate transport, GOslim:biological_process	2	2	0.143	1
ORGANIC_ANION_TRANSPORT	GO:0015711 organic anion transport, GOslim:biological_process	17	6	0.2009	1
MAINTENANCE_OF_PROTEIN_LOCATION_IN_PLASMA_MEMBRANE	GO:0072660 maintenance of protein location in plasma membrane, GOslim:biological_process	1	1	0.3186	1
PHOSPHATE_ION_TRANSMEMBRANE_TRANSPORT	GO:0035435 phosphate ion transmembrane transport, GOslim:biological_process	1	1	0.3186	1
REGULATION_OF_RESPONSE_TO_BIOTIC_STIMULUS	GO:0002831 regulation of response to biotic stimulus, GOslim:biological_process	15	5	0.2623	1
RESPONSE_TO_TREHALOSE-6-PHOSPHATE_STIMULUS	GO:0080094 response to trehalose-6-phosphate stimulus, GOslim:biological_process	1	1	0.3186	1
WAX_METABOLIC_PROCESS	GO:0010166 wax metabolic process, GOslim:biological_process	19	8	0.0844	1
CHLOROPLAST_RELOCATION	GO:0009902 chloroplast relocation, GOslim:biological_process	104	1	1	1
SUCROSE_TRANSPORT	GO:0015770 sucrose transport, GOslim:biological_process	14	5	0.227	1
RESPONSE_TO_RED_LIGHT	GO:0010114 response to red light, GOslim:biological_process	104	11	0.9941	1
PYRIMIDINE_RIBONUCLEOTIDE_METABOLIC_PROCESS	GO:0009218 pyrimidine ribonucleotide metabolic process, GOslim:biological_process	147	40	0.0946	1
CELLULAR_CALCIUM_ION_HOMEOSTASIS	GO:0006874 cellular calcium ion homeostasis, GOslim:biological_process	29	8	0.3124	1
BETA-GLUCAN_BIOSYNTHETIC_PROCESS	GO:0051274 beta-glucan biosynthetic process, GOslim:biological_process	13	6	0.0986	1
REGULATION_OF_ACTIN_FILAMENT-BASED_PROCESS	GO:0032970 regulation of actin filament-based process, GOslim:biological_process	22	3	0.8371	1
AMMONIUM_TRANSMEMBRANE_TRANSPORT	GO:0072488 ammonium transmembrane transport, GOslim:biological_process	2	1	0.4375	1
AMINO_ACID_HOMEOSTASIS	GO:0080144 amino acid homeostasis, GOslim:biological_process	4	3	0.1071	1
MANNITOL_BIOSYNTHETIC_PROCESS	GO:0019593 mannitol biosynthetic process, GOslim:biological_process	1	1	0.3186	1
MODULATION_BY_ORGANISM_OF_IMMUNE_RESPONSE_OF_OTHER_ORGANISM_INVOLVED_IN_SYMBIOTIC_INTERACTION	GO:0052552 modulation by organism of immune response of other organism involved in symbiotic interaction, GOslim:biological_process	6	5	0.0295	1
PROTEIN_LOCALIZATION_TO_MITOCHONDRION	GO:0070585 protein localization to mitochondrion, GOslim:biological_process	106	30	0.0983	1
CELLULAR_CHEMICAL_HOMEOSTASIS	GO:0055082 cellular chemical homeostasis, GOslim:biological_process	182	48	0.1015	1
MICROTUBULE_POLYMERIZATION	GO:0046785 microtubule polymerization, GOslim:biological_process	7	2	0.4834	1
COENZYME_A_METABOLIC_PROCESS	GO:0015936 coenzyme A metabolic process, GOslim:biological_process	11	2	0.6902	1
HIGH-AFFINITY_IRON_ION_TRANSPORT	GO:0006827 high-affinity iron ion transport, GOslim:biological_process	1	1	0.3186	1
REGULATION_OF_MONOPOLAR_CELL_GROWTH	GO:0051513 regulation of monopolar cell growth, GOslim:biological_process	2	1	0.4375	1
HISTIDINE_FAMILY_AMINO_ACID_METABOLIC_PROCESS	GO:0009075 histidine family amino acid metabolic process, GOslim:biological_process	11	1	0.8999	1
REGULATION_OF_METAL_ION_TRANSPORT	GO:0010959 regulation of metal ion transport, GOslim:biological_process	7	2	0.4834	1
PYRIMIDINE_RIBONUCLEOSIDE_MONOPHOSPHATE_BIOSYNTHETIC_PROCESS	GO:0009174 pyrimidine ribonucleoside monophosphate biosynthetic process, GOslim:biological_process	5	3	0.1499	1
MICROGAMETOGENESIS	GO:0055046 microgametogenesis, GOslim:biological_process	42	8	0.6639	1
RESPONSE_TO_DRUG	GO:0042493 response to drug, GOslim:biological_process	75	24	0.0537	1
CELL_FATE_COMMITMENT	GO:0045165 cell fate commitment, GOslim:biological_process	68	10	0.8942	1
REGULATION_OF_CELL_AGING	GO:0090342 regulation of cell aging, GOslim:biological_process	3	1	0.5357	1
TRNA_TRANSPORT	GO:0051031 tRNA transport, GOslim:biological_process	2	2	0.143	1
ABSCISIC_ACID_TRANSPORT	GO:0080168 abscisic acid transport, GOslim:biological_process	3	2	0.2115	1
SIGNAL_PEPTIDE_PROCESSING	GO:0006465 signal peptide processing, GOslim:biological_process	11	4	0.2586	1
NEGATIVE_REGULATION_OF_ACTIN_FILAMENT_DEPOLYMERIZATION	GO:0030835 negative regulation of actin filament depolymerization, GOslim:biological_process	8	1	0.822	1
ARGININE_TRANSPORT	GO:0015809 arginine transport, GOslim:biological_process	4	1	0.6167	1
[truncated: 924 more rows]

## Sheet: c) Cluster 2
Description	GO ID	Total	Found	p-value	q-value
RESPONSE_TO_STIMULUS	GO:0050896 response to stimulus, GOslim:biological_process	6222	806	1.79e-26	3.38e-22
RESPONSE_TO_STRESS	GO:0006950 response to stress, GOslim:biological_process	4037	563	8.94e-24	8.44e-20
RNA_CATABOLIC_PROCESS	GO:0006401 RNA catabolic process, GOslim:biological_process	116	62	1.68e-23	1.06e-19
NUCLEAR-TRANSCRIBED_MRNA_CATABOLIC_PROCESS	GO:0000956 nuclear-transcribed mRNA catabolic process, GOslim:biological_process	107	59	6.02e-23	2.27e-19
MRNA_CATABOLIC_PROCESS	GO:0006402 mRNA catabolic process, GOslim:biological_process	107	59	6.02e-23	2.27e-19
RESPONSE_TO_BIOTIC_STIMULUS	GO:0009607 response to biotic stimulus, GOslim:biological_process	1675	287	3.08e-22	9.68e-19
INNATE_IMMUNE_RESPONSE	GO:0045087 innate immune response, GOslim:biological_process	926	190	4.98e-22	1.34e-18
RESPONSE_TO_OTHER_ORGANISM	GO:0051707 response to other organism, GOslim:biological_process	1411	251	2.42e-21	5.71e-18
IMMUNE_RESPONSE	GO:0006955 immune response, GOslim:biological_process	980	193	1.22e-20	2.31e-17
IMMUNE_SYSTEM_PROCESS	GO:0002376 immune system process, GOslim:biological_process	980	193	1.22e-20	2.31e-17
CELLULAR_PROCESS	GO:0009987 cellular process, GOslim:biological_process	14300	1535	3.46e-20	5.93e-17
CELLULAR_RESPONSE_TO_STIMULUS	GO:0051716 cellular response to stimulus, GOslim:biological_process	2302	349	3.42e-19	5.38e-16
DEFENSE_RESPONSE,_INCOMPATIBLE_INTERACTION	GO:0009814 defense response, incompatible interaction, GOslim:biological_process	535	126	6.09e-19	8.84e-16
DEFENSE_RESPONSE	GO:0006952 defense response, GOslim:biological_process	1644	269	1.66e-18	2.24e-15
CELLULAR_PROTEIN_MODIFICATION_PROCESS	GO:0006464 cellular protein modification process, GOslim:biological_process	2764	396	4.48e-18	5.64e-15
MRNA_METABOLIC_PROCESS	GO:0016071 mRNA metabolic process, GOslim:biological_process	379	97	7.96e-17	9.38e-14
RESPONSE_TO_BACTERIUM	GO:0009617 response to bacterium, GOslim:biological_process	572	125	1.25e-16	1.39e-13
CELLULAR_RESPONSE_TO_STRESS	GO:0033554 cellular response to stress, GOslim:biological_process	1431	234	3.75e-16	3.93e-13
MULTI-ORGANISM_PROCESS	GO:0051704 multi-organism process, GOslim:biological_process	1804	274	3.23e-15	3.21e-12
NEGATIVE_REGULATION_OF_BIOLOGICAL_PROCESS	GO:0048519 negative regulation of biological process, GOslim:biological_process	1215	204	3.41e-15	3.22e-12
GLYCOSYLATION	GO:0070085 glycosylation, GOslim:biological_process	225	68	4.52e-15	3.56e-12
MACROMOLECULE_GLYCOSYLATION	GO:0043413 macromolecule glycosylation, GOslim:biological_process	225	68	4.52e-15	3.56e-12
GLYCOPROTEIN_BIOSYNTHETIC_PROCESS	GO:0009101 glycoprotein biosynthetic process, GOslim:biological_process	225	68	4.52e-15	3.56e-12
PROTEIN_GLYCOSYLATION	GO:0006486 protein glycosylation, GOslim:biological_process	225	68	4.52e-15	3.56e-12
GLYCOPROTEIN_METABOLIC_PROCESS	GO:0009100 glycoprotein metabolic process, GOslim:biological_process	229	68	9.23e-15	6.97e-12
CELLULAR_CATABOLIC_PROCESS	GO:0044248 cellular catabolic process, GOslim:biological_process	2088	304	1.08e-14	7.83e-12
CATABOLIC_PROCESS	GO:0009056 catabolic process, GOslim:biological_process	2175	312	2.5e-14	1.75e-11
RESPONSE_TO_CHEMICAL_STIMULUS	GO:0042221 response to chemical stimulus, GOslim:biological_process	3953	503	2.86e-14	1.93e-11
RESPONSE_TO_ABIOTIC_STIMULUS	GO:0009628 response to abiotic stimulus, GOslim:biological_process	2615	360	3.38e-14	2.2e-11
CELLULAR_RESPONSE_TO_CHEMICAL_STIMULUS	GO:0070887 cellular response to chemical stimulus, GOslim:biological_process	1403	222	4.74e-14	2.98e-11
REGULATION_OF_CELLULAR_PROCESS	GO:0050794 regulation of cellular process, GOslim:biological_process	4571	564	7.99e-14	4.87e-11
MACROMOLECULE_MODIFICATION	GO:0043412 macromolecule modification, GOslim:biological_process	3188	419	1.08e-13	6.36e-11
SYSTEMIC_ACQUIRED_RESISTANCE	GO:0009627 systemic acquired resistance, GOslim:biological_process	444	98	1.52e-13	8.68e-11
REGULATION_OF_BIOLOGICAL_PROCESS	GO:0050789 regulation of biological process, GOslim:biological_process	5191	625	1.58e-13	8.77e-11
VESICLE-MEDIATED_TRANSPORT	GO:0016192 vesicle-mediated transport, GOslim:biological_process	597	119	1.81e-13	9.73e-11
CELLULAR_METABOLIC_PROCESS	GO:0044237 cellular metabolic process, GOslim:biological_process	11467	1225	3.99e-13	2.09e-10
CELLULAR_RESPONSE_TO_ORGANIC_SUBSTANCE	GO:0071310 cellular response to organic substance, GOslim:biological_process	1221	195	8.8e-13	4.49e-10
NEGATIVE_REGULATION_OF_RESPONSE_TO_STIMULUS	GO:0048585 negative regulation of response to stimulus, GOslim:biological_process	346	81	1.52e-12	7.56e-10
SIGNAL_TRANSMISSION	GO:0023060 signal transmission, GOslim:biological_process	1743	254	2e-12	9.66e-10
GRAVITROPISM	GO:0009630 gravitropism, GOslim:biological_process	154	50	2.1e-12	9.89e-10
BIOLOGICAL_REGULATION	GO:0065007 biological regulation, GOslim:biological_process	6172	714	2.58e-12	1.19e-09
DEFENSE_RESPONSE_TO_BACTERIUM	GO:0042742 defense response to bacterium, GOslim:biological_process	390	86	4.87e-12	2.19e-09
REGULATION_OF_RESPONSE_TO_STIMULUS	GO:0048583 regulation of response to stimulus, GOslim:biological_process	662	122	8.86e-12	3.89e-09
METABOLIC_PROCESS	GO:0008152 metabolic process, GOslim:biological_process	13568	1405	9.83e-12	4.12e-09
RESPONSE_TO_GRAVITY	GO:0009629 response to gravity, GOslim:biological_process	162	50	9.68e-12	4.12e-09
DEFENSE_RESPONSE_TO_FUNGUS	GO:0050832 defense response to fungus, GOslim:biological_process	342	78	1.18e-11	4.82e-09
POST-TRANSLATIONAL_PROTEIN_MODIFICATION	GO:0043687 post-translational protein modification, GOslim:biological_process	2069	286	1.46e-11	5.85e-09
SIGNAL_TRANSDUCTION	GO:0007165 signal transduction, GOslim:biological_process	1659	240	1.64e-11	6.44e-09
TROPISM	GO:0009606 tropism, GOslim:biological_process	166	50	2.01e-11	7.73e-09
SALICYLIC_ACID_BIOSYNTHETIC_PROCESS	GO:0009697 salicylic acid biosynthetic process, GOslim:biological_process	209	57	2.25e-11	8.49e-09
SALICYLIC_ACID_METABOLIC_PROCESS	GO:0009696 salicylic acid metabolic process, GOslim:biological_process	222	59	2.43e-11	8.98e-09
NEGATIVE_REGULATION_OF_CELLULAR_PROCESS	GO:0048523 negative regulation of cellular process, GOslim:biological_process	779	135	2.95e-11	1.07e-08
SIGNALING	GO:0023052 signaling, GOslim:biological_process	2317	311	3.49e-11	1.24e-08
INTRACELLULAR_TRANSPORT	GO:0046907 intracellular transport, GOslim:biological_process	1422	210	6.85e-11	2.4e-08
OXYGEN_AND_REACTIVE_OXYGEN_SPECIES_METABOLIC_PROCESS	GO:0006800 oxygen and reactive oxygen species metabolic process, GOslim:biological_process	347	76	1.1e-10	3.76e-08
HYDROGEN_PEROXIDE_METABOLIC_PROCESS	GO:0042743 hydrogen peroxide metabolic process, GOslim:biological_process	335	74	1.38e-10	4.65e-08
MAPK_CASCADE	GO:0000165 MAPK cascade, GOslim:biological_process	209	55	1.55e-10	5.12e-08
INTRACELLULAR_PROTEIN_KINASE_CASCADE	GO:0007243 intracellular protein kinase cascade, GOslim:biological_process	223	57	1.86e-10	6.04e-08
TRANSPORT	GO:0006810 transport, GOslim:biological_process	3558	437	2.06e-10	6.6e-08
RESPONSE_TO_ORGANIC_SUBSTANCE	GO:0010033 response to organic substance, GOslim:biological_process	2739	351	2.51e-10	7.91e-08
NEGATIVE_REGULATION_OF_DEFENSE_RESPONSE	GO:0031348 negative regulation of defense response, GOslim:biological_process	273	64	3.11e-10	9.61e-08
REGULATION_OF_RESPONSE_TO_STRESS	GO:0080134 regulation of response to stress, GOslim:biological_process	544	101	3.89e-10	1.16e-07
CELLULAR_MACROMOLECULE_CATABOLIC_PROCESS	GO:0044265 cellular macromolecule catabolic process, GOslim:biological_process	1201	181	3.83e-10	1.16e-07
CELLULAR_LOCALIZATION	GO:0051641 cellular localization, GOslim:biological_process	1611	227	5.1e-10	1.5e-07
POSITIVE_REGULATION_OF_BIOLOGICAL_PROCESS	GO:0048518 positive regulation of biological process, GOslim:biological_process	886	143	5.83e-10	1.69e-07
ESTABLISHMENT_OF_LOCALIZATION_IN_CELL	GO:0051649 establishment of localization in cell, GOslim:biological_process	1553	220	6.38e-10	1.83e-07
RESPONSE_TO_FUNGUS	GO:0009620 response to fungus, GOslim:biological_process	497	94	6.9e-10	1.94e-07
CELL_DEATH	GO:0008219 cell death, GOslim:biological_process	498	94	7.55e-10	2.06e-07
DEATH	GO:0016265 death, GOslim:biological_process	498	94	7.55e-10	2.06e-07
MACROMOLECULE_CATABOLIC_PROCESS	GO:0009057 macromolecule catabolic process, GOslim:biological_process	1248	185	7.68e-10	2.07e-07
REGULATION_OF_DEFENSE_RESPONSE	GO:0031347 regulation of defense response, GOslim:biological_process	529	98	7.82e-10	2.08e-07
LOCALIZATION	GO:0051179 localization, GOslim:biological_process	3799	457	9.41e-10	2.47e-07
PROTEIN_MODIFICATION_BY_SMALL_PROTEIN_CONJUGATION_OR_REMOVAL	GO:0070647 protein modification by small protein conjugation or removal, GOslim:biological_process	413	82	1.21e-09	3.14e-07
RESPONSE_TO_ENDOPLASMIC_RETICULUM_STRESS	GO:0034976 response to endoplasmic reticulum stress, GOslim:biological_process	351	73	1.78e-09	4.51e-07
ESTABLISHMENT_OF_LOCALIZATION	GO:0051234 establishment of localization, GOslim:biological_process	3633	438	1.79e-09	4.51e-07
PROTEIN_N-LINKED_GLYCOSYLATION	GO:0006487 protein N-linked glycosylation, GOslim:biological_process	105	35	2.3e-09	5.71e-07
SALICYLIC_ACID_MEDIATED_SIGNALING_PATHWAY	GO:0009863 salicylic acid mediated signaling pathway, GOslim:biological_process	349	72	3.08e-09	7.55e-07
MACROMOLECULE_METABOLIC_PROCESS	GO:0043170 macromolecule metabolic process, GOslim:biological_process	9200	978	3.31e-09	8e-07
CELLULAR_RESPONSE_TO_SALICYLIC_ACID_STIMULUS	GO:0071446 cellular response to salicylic acid stimulus, GOslim:biological_process	351	72	3.79e-09	9.06e-07
PROGRAMMED_CELL_DEATH	GO:0012501 programmed cell death, GOslim:biological_process	450	85	4.72e-09	1.11e-06
RESPONSE_TO_SALICYLIC_ACID_STIMULUS	GO:0009751 response to salicylic acid stimulus, GOslim:biological_process	470	87	7.14e-09	1.66e-06
CELLULAR_MACROMOLECULE_METABOLIC_PROCESS	GO:0044260 cellular macromolecule metabolic process, GOslim:biological_process	8586	916	8.57e-09	1.97e-06
VEGETATIVE_TO_REPRODUCTIVE_PHASE_TRANSITION_OF_MERISTEM	GO:0010228 vegetative to reproductive phase transition of meristem, GOslim:biological_process	450	84	9.28e-09	2.11e-06
GOLGI_VESICLE_TRANSPORT	GO:0048193 Golgi vesicle transport, GOslim:biological_process	327	67	1.35e-08	3.04e-06
REGULATION_OF_HYDROGEN_PEROXIDE_METABOLIC_PROCESS	GO:0010310 regulation of hydrogen peroxide metabolic process, GOslim:biological_process	187	46	2.72e-08	6.05e-06
REGULATION_OF_OXYGEN_AND_REACTIVE_OXYGEN_SPECIES_METABOLIC_PROCESS	GO:0080010 regulation of oxygen and reactive oxygen species metabolic process, GOslim:biological_process	188	46	3.12e-08	6.85e-06
RESPONSE_TO_EXTERNAL_STIMULUS	GO:0009605 response to external stimulus, GOslim:biological_process	1047	154	3.31e-08	7.18e-06
SYSTEMIC_ACQUIRED_RESISTANCE,_SALICYLIC_ACID_MEDIATED_SIGNALING_PATHWAY	GO:0009862 systemic acquired resistance, salicylic acid mediated signaling pathway, GOslim:biological_process	251	55	3.88e-08	8.32e-06
PRIMARY_METABOLIC_PROCESS	GO:0044238 primary metabolic process, GOslim:biological_process	11672	1196	4.34e-08	9.2e-06
POSITIVE_REGULATION_OF_CELLULAR_PROCESS	GO:0048522 positive regulation of cellular process, GOslim:biological_process	787	123	4.66e-08	9.77e-06
PLANT-TYPE_HYPERSENSITIVE_RESPONSE	GO:0009626 plant-type hypersensitive response, GOslim:biological_process	401	75	5.29e-08	1.1e-05
HOST_PROGRAMMED_CELL_DEATH_INDUCED_BY_SYMBIONT	GO:0034050 host programmed cell death induced by symbiont, GOslim:biological_process	402	75	5.78e-08	1.19e-05
IMMUNE_EFFECTOR_PROCESS	GO:0002252 immune effector process, GOslim:biological_process	273	57	9.19e-08	1.84e-05
REGULATION_OF_INNATE_IMMUNE_RESPONSE	GO:0045088 regulation of innate immune response, GOslim:biological_process	415	76	9.14e-08	1.84e-05
PROTEIN_MODIFICATION_BY_SMALL_PROTEIN_REMOVAL	GO:0070646 protein modification by small protein removal, GOslim:biological_process	184	44	1.08e-07	2.14e-05
REGULATION_OF_IMMUNE_RESPONSE	GO:0050776 regulation of immune response, GOslim:biological_process	419	76	1.28e-07	2.49e-05
REGULATION_OF_IMMUNE_SYSTEM_PROCESS	GO:0002682 regulation of immune system process, GOslim:biological_process	419	76	1.28e-07	2.49e-05
CELLULAR_RESPONSE_TO_ENDOGENOUS_STIMULUS	GO:0071495 cellular response to endogenous stimulus, GOslim:biological_process	804	122	2.15e-07	4.13e-05
CELL_CYCLE	GO:0007049 cell cycle, GOslim:biological_process	802	121	3.13e-07	5.98e-05
PROTEIN_METABOLIC_PROCESS	GO:0019538 protein metabolic process, GOslim:biological_process	5207	576	3.19e-07	6.02e-05
PROTEIN_FOLDING	GO:0006457 protein folding, GOslim:biological_process	338	64	3.36e-07	6.28e-05
RESPONSE_TO_TEMPERATURE_STIMULUS	GO:0009266 response to temperature stimulus, GOslim:biological_process	955	138	4.19e-07	7.74e-05
CELLULAR_PROTEIN_METABOLIC_PROCESS	GO:0044267 cellular protein metabolic process, GOslim:biological_process	4762	531	4.48e-07	8.22e-05
REGULATION_OF_CELL_DEATH	GO:0010941 regulation of cell death, GOslim:biological_process	405	72	5.25e-07	9.52e-05
RESPONSE_TO_CHITIN	GO:0010200 response to chitin, GOslim:biological_process	421	74	5.36e-07	9.63e-05
RESPONSE_TO_HEAT	GO:0009408 response to heat, GOslim:biological_process	303	58	8.64e-07	0.000154
RESPIRATORY_BURST	GO:0045730 respiratory burst, GOslim:biological_process	121	32	9e-07	0.000157
RESPIRATORY_BURST_INVOLVED_IN_DEFENSE_RESPONSE	GO:0002679 respiratory burst involved in defense response, GOslim:biological_process	121	32	9e-07	0.000157
REGULATION_OF_PROGRAMMED_CELL_DEATH	GO:0043067 regulation of programmed cell death, GOslim:biological_process	397	70	9.73e-07	0.000168
MACROMOLECULE_LOCALIZATION	GO:0033036 macromolecule localization, GOslim:biological_process	1528	199	1.03e-06	0.000177
DETECTION_OF_STIMULUS	GO:0051606 detection of stimulus, GOslim:biological_process	148	36	1.06e-06	0.000178
NEGATIVE_REGULATION_OF_DEVELOPMENTAL_PROCESS	GO:0051093 negative regulation of developmental process, GOslim:biological_process	148	36	1.06e-06	0.000178
RESPONSE_TO_REACTIVE_OXYGEN_SPECIES	GO:0000302 response to reactive oxygen species, GOslim:biological_process	336	62	1.08e-06	0.00018
PEPTIDE_TRANSPORT	GO:0015833 peptide transport, GOslim:biological_process	116	31	1.1e-06	0.00018
OLIGOPEPTIDE_TRANSPORT	GO:0006857 oligopeptide transport, GOslim:biological_process	116	31	1.1e-06	0.00018
DETECTION_OF_BIOTIC_STIMULUS	GO:0009595 detection of biotic stimulus, GOslim:biological_process	104	29	1.18e-06	0.000191
REGULATION_OF_CELLULAR_RESPONSE_TO_STRESS	GO:0080135 regulation of cellular response to stress, GOslim:biological_process	379	67	1.52e-06	0.000245
CELLULAR_MEMBRANE_FUSION	GO:0006944 cellular membrane fusion, GOslim:biological_process	275	53	2.11e-06	0.000334
MEMBRANE_FUSION	GO:0061025 membrane fusion, GOslim:biological_process	275	53	2.11e-06	0.000334
LIPID_CATABOLIC_PROCESS	GO:0016042 lipid catabolic process, GOslim:biological_process	262	51	2.54e-06	0.000399
RNA_SPLICING	GO:0008380 RNA splicing, GOslim:biological_process	300	56	2.59e-06	0.000404
NEGATIVE_REGULATION_OF_POST-EMBRYONIC_DEVELOPMENT	GO:0048581 negative regulation of post-embryonic development, GOslim:biological_process	79	24	2.8e-06	0.000424
REGULATION_OF_PLANT-TYPE_HYPERSENSITIVE_RESPONSE	GO:0010363 regulation of plant-type hypersensitive response, GOslim:biological_process	371	65	2.81e-06	0.000424
RESPONSE_TO_HYDROGEN_PEROXIDE	GO:0042542 response to hydrogen peroxide, GOslim:biological_process	263	51	2.79e-06	0.000424
RESPONSE_TO_RADIATION	GO:0009314 response to radiation, GOslim:biological_process	1257	167	2.8e-06	0.000424
CELLULAR_PROTEIN_LOCALIZATION	GO:0034613 cellular protein localization, GOslim:biological_process	1057	145	2.85e-06	0.000427
CHROMOSOME_ORGANIZATION	GO:0051276 chromosome organization, GOslim:biological_process	747	110	2.9e-06	0.000431
CELL_COMMUNICATION	GO:0007154 cell communication, GOslim:biological_process	705	105	3.11e-06	0.000459
MITOTIC_CELL_CYCLE	GO:0000278 mitotic cell cycle, GOslim:biological_process	303	56	3.36e-06	0.000492
CELLULAR_MACROMOLECULE_LOCALIZATION	GO:0070727 cellular macromolecule localization, GOslim:biological_process	1091	148	3.87e-06	0.000561
NEGATIVE_REGULATION_OF_CELL_DEATH	GO:0060548 negative regulation of cell death, GOslim:biological_process	174	38	4.91e-06	0.000708
INTRACELLULAR_PROTEIN_TRANSPORT	GO:0006886 intracellular protein transport, GOslim:biological_process	1043	142	5.13e-06	0.000734
CHROMATIN_SILENCING	GO:0006342 chromatin silencing, GOslim:biological_process	241	47	5.89e-06	0.000836
FATTY_ACID_CATABOLIC_PROCESS	GO:0009062 fatty acid catabolic process, GOslim:biological_process	220	44	6.65e-06	0.000936
PROTEIN_LOCALIZATION	GO:0008104 protein localization, GOslim:biological_process	1214	160	6.75e-06	0.000943
NEGATIVE_REGULATION_OF_PROGRAMMED_CELL_DEATH	GO:0043069 negative regulation of programmed cell death, GOslim:biological_process	170	37	6.95e-06	0.000957
MRNA_PROCESSING	GO:0006397 mRNA processing, GOslim:biological_process	177	38	6.91e-06	0.000957
PROTEIN_TARGETING	GO:0006605 protein targeting, GOslim:biological_process	906	126	7.11e-06	0.00097
CELLULAR_COMPONENT_ORGANIZATION	GO:0016043 cellular component organization, GOslim:biological_process	3130	358	7.15e-06	0.00097
FATTY_ACID_BETA-OXIDATION	GO:0006635 fatty acid beta-oxidation, GOslim:biological_process	171	37	7.79e-06	0.00105
CELLULAR_LIPID_CATABOLIC_PROCESS	GO:0044242 cellular lipid catabolic process, GOslim:biological_process	252	48	8.17e-06	0.00109
NEGATIVE_REGULATION_OF_GENE_EXPRESSION,_EPIGENETIC	GO:0045814 negative regulation of gene expression, epigenetic, GOslim:biological_process	245	47	8.58e-06	0.00114
RESPONSE_TO_OXIDATIVE_STRESS	GO:0006979 response to oxidative stress, GOslim:biological_process	586	89	8.84e-06	0.00117
RESPONSE_TO_INORGANIC_SUBSTANCE	GO:0010035 response to inorganic substance, GOslim:biological_process	1075	144	9.34e-06	0.00122
PROTEIN_DESUMOYLATION	GO:0016926 protein desumoylation, GOslim:biological_process	80	23	9.54e-06	0.00124
PROTEIN_TRANSPORT	GO:0015031 protein transport, GOslim:biological_process	1159	153	9.92e-06	0.00127
ESTABLISHMENT_OF_PROTEIN_LOCALIZATION	GO:0045184 establishment of protein localization, GOslim:biological_process	1159	153	9.92e-06	0.00127
NEGATIVE_REGULATION_OF_TRANSCRIPTION,_DNA-DEPENDENT	GO:0045892 negative regulation of transcription, DNA-dependent, GOslim:biological_process	398	66	1.15e-05	0.00146
NEGATIVE_REGULATION_OF_RNA_METABOLIC_PROCESS	GO:0051253 negative regulation of RNA metabolic process, GOslim:biological_process	398	66	1.15e-05	0.00146
RESPONSE_TO_LIGHT_STIMULUS	GO:0009416 response to light stimulus, GOslim:biological_process	1182	155	1.19e-05	0.0015
PROTEIN_TARGETING_TO_MEMBRANE	GO:0006612 protein targeting to membrane, GOslim:biological_process	392	65	1.34e-05	0.00167
FATTY_ACID_OXIDATION	GO:0019395 fatty acid oxidation, GOslim:biological_process	176	37	1.36e-05	0.00168
PROTEIN_MODIFICATION_BY_SMALL_PROTEIN_CONJUGATION	GO:0032446 protein modification by small protein conjugation, GOslim:biological_process	281	51	1.38e-05	0.00171
REGULATION_OF_CELLULAR_METABOLIC_PROCESS	GO:0031323 regulation of cellular metabolic process, GOslim:biological_process	2917	334	1.4e-05	0.00171
JASMONIC_ACID_MEDIATED_SIGNALING_PATHWAY	GO:0009867 jasmonic acid mediated signaling pathway, GOslim:biological_process	282	51	1.51e-05	0.00182
CELLULAR_RESPONSE_TO_JASMONIC_ACID_STIMULUS	GO:0071395 cellular response to jasmonic acid stimulus, GOslim:biological_process	282	51	1.51e-05	0.00182
REGULATION_OF_METABOLIC_PROCESS	GO:0019222 regulation of metabolic process, GOslim:biological_process	3154	357	1.67e-05	0.00201
DETECTION_OF_EXTERNAL_STIMULUS	GO:0009581 detection of external stimulus, GOslim:biological_process	60	19	1.83e-05	0.00218
NEGATIVE_REGULATION_OF_NITROGEN_COMPOUND_METABOLIC_PROCESS	GO:0051172 negative regulation of nitrogen compound metabolic process, GOslim:biological_process	413	67	1.84e-05	0.00218
NEGATIVE_REGULATION_OF_CELLULAR_METABOLIC_PROCESS	GO:0031324 negative regulation of cellular metabolic process, GOslim:biological_process	447	71	1.95e-05	0.00229
TRICHOME_MORPHOGENESIS	GO:0010090 trichome morphogenesis, GOslim:biological_process	151	33	1.98e-05	0.00232
AGING	GO:0007568 aging, GOslim:biological_process	145	32	2.22e-05	0.00258
AMINE_TRANSPORT	GO:0015837 amine transport, GOslim:biological_process	272	49	2.39e-05	0.00277
LIPID_OXIDATION	GO:0034440 lipid oxidation, GOslim:biological_process	182	37	2.55e-05	0.00294
NEGATIVE_REGULATION_OF_FLOWER_DEVELOPMENT	GO:0009910 negative regulation of flower development, GOslim:biological_process	45	16	2.61e-05	0.00298
AMINO_ACID_TRANSPORT	GO:0006865 amino acid transport, GOslim:biological_process	266	48	2.77e-05	0.00315
NEGATIVE_REGULATION_OF_NUCLEOBASE-CONTAINING_COMPOUND_METABOLIC_PROCESS	GO:0045934 negative regulation of nucleobase-containing compound metabolic process, GOslim:biological_process	411	66	2.79e-05	0.00315
PHOSPHATE-CONTAINING_COMPOUND_METABOLIC_PROCESS	GO:0006796 phosphate-containing compound metabolic process, GOslim:biological_process	1573	194	2.88e-05	0.00323
DEFENSE_RESPONSE_TO_BACTERIUM,_INCOMPATIBLE_INTERACTION	GO:0009816 defense response to bacterium, incompatible interaction, GOslim:biological_process	35	14	2.91e-05	0.00325
PHOSPHORUS_METABOLIC_PROCESS	GO:0006793 phosphorus metabolic process, GOslim:biological_process	1574	194	2.97e-05	0.0033
PROTEIN_UBIQUITINATION	GO:0016567 protein ubiquitination, GOslim:biological_process	261	47	3.49e-05	0.00386
NEGATIVE_REGULATION_OF_CELLULAR_BIOSYNTHETIC_PROCESS	GO:0031327 negative regulation of cellular biosynthetic process, GOslim:biological_process	423	67	3.55e-05	0.00387
NEGATIVE_REGULATION_OF_BIOSYNTHETIC_PROCESS	GO:0009890 negative regulation of biosynthetic process, GOslim:biological_process	423	67	3.55e-05	0.00387
NEGATIVE_REGULATION_OF_MACROMOLECULE_BIOSYNTHETIC_PROCESS	GO:0010558 negative regulation of macromolecule biosynthetic process, GOslim:biological_process	416	66	3.87e-05	0.00419
RESPONSE_TO_HIGH_LIGHT_INTENSITY	GO:0009644 response to high light intensity, GOslim:biological_process	224	42	3.99e-05	0.0043
RESPONSE_TO_ENDOGENOUS_STIMULUS	GO:0009719 response to endogenous stimulus, GOslim:biological_process	1604	196	4.23e-05	0.00453
ORGAN_SENESCENCE	GO:0010260 organ senescence, GOslim:biological_process	96	24	4.3e-05	0.00456
SENESCENCE	GO:0010149 senescence, GOslim:biological_process	96	24	4.3e-05	0.00456
CELLULAR_CARBOHYDRATE_METABOLIC_PROCESS	GO:0044262 cellular carbohydrate metabolic process, GOslim:biological_process	1771	213	4.67e-05	0.00487
HAIR_CELL_DIFFERENTIATION	GO:0035315 hair cell differentiation, GOslim:biological_process	166	34	4.67e-05	0.00487
TRICHOME_DIFFERENTIATION	GO:0010026 trichome differentiation, GOslim:biological_process	166	34	4.67e-05	0.00487
REGULATION_OF_ORGANELLE_ORGANIZATION	GO:0033043 regulation of organelle organization, GOslim:biological_process	175	35	5.55e-05	0.00575
CARBOXYLIC_ACID_TRANSPORT	GO:0046942 carboxylic acid transport, GOslim:biological_process	283	49	5.76e-05	0.00594
RNA_INTERFERENCE	GO:0016246 RNA interference, GOslim:biological_process	184	36	6.49e-05	0.00665
RESPONSE_TO_CARBOHYDRATE_STIMULUS	GO:0009743 response to carbohydrate stimulus, GOslim:biological_process	811	110	6.63e-05	0.00676
PROTEIN_PHOSPHORYLATION	GO:0006468 protein phosphorylation, GOslim:biological_process	1135	145	6.98e-05	0.00709
RESPONSE_TO_LIGHT_INTENSITY	GO:0009642 response to light intensity, GOslim:biological_process	278	48	7.23e-05	0.0073
MULTICELLULAR_ORGANISMAL_PROCESS	GO:0032501 multicellular organismal process, GOslim:biological_process	3963	430	7.62e-05	0.00765
SISTER_CHROMATID_COHESION	GO:0007062 sister chromatid cohesion, GOslim:biological_process	142	30	7.84e-05	0.00783
NEGATIVE_REGULATION_OF_GENE_EXPRESSION	GO:0010629 negative regulation of gene expression, GOslim:biological_process	592	85	8.14e-05	0.00809
RESPONSE_TO_MOLECULE_OF_BACTERIAL_ORIGIN	GO:0002237 response to molecule of bacterial origin, GOslim:biological_process	101	24	8.5e-05	0.0084
POSTTRANSCRIPTIONAL_REGULATION_OF_GENE_EXPRESSION	GO:0010608 posttranscriptional regulation of gene expression, GOslim:biological_process	329	54	8.69e-05	0.00855
GENE_SILENCING_BY_RNA	GO:0031047 gene silencing by RNA, GOslim:biological_process	354	57	8.88e-05	0.00869
ORGANIC_ACID_TRANSPORT	GO:0015849 organic acid transport, GOslim:biological_process	289	49	9.06e-05	0.00882
NEGATIVE_REGULATION_OF_METABOLIC_PROCESS	GO:0009892 negative regulation of metabolic process, GOslim:biological_process	640	90	9.84e-05	0.00952
REGULATION_OF_CELL_DIFFERENTIATION	GO:0045595 regulation of cell differentiation, GOslim:biological_process	130	28	0.000101	0.00968
EMBRYONIC_PATTERN_SPECIFICATION	GO:0009880 embryonic pattern specification, GOslim:biological_process	46	15	0.000103	0.0099
CELL_ADHESION	GO:0007155 cell adhesion, GOslim:biological_process	96	23	0.000106	0.0101
BIOLOGICAL_ADHESION	GO:0022610 biological adhesion, GOslim:biological_process	96	23	0.000106	0.0101
GENE_SILENCING	GO:0016458 gene silencing, GOslim:biological_process	433	66	0.00011	0.0104
ORGANELLE_ORGANIZATION	GO:0006996 organelle organization, GOslim:biological_process	2037	237	0.000115	0.0108
AROMATIC_COMPOUND_BIOSYNTHETIC_PROCESS	GO:0019438 aromatic compound biosynthetic process, GOslim:biological_process	679	94	0.000115	0.0108
REGULATION_OF_RNA_METABOLIC_PROCESS	GO:0051252 regulation of RNA metabolic process, GOslim:biological_process	2384	272	0.000117	0.0109
POSITIVE_REGULATION_OF_CELL_PROLIFERATION	GO:0008284 positive regulation of cell proliferation, GOslim:biological_process	71	19	0.000123	0.0114
LIPID_MODIFICATION	GO:0030258 lipid modification, GOslim:biological_process	222	40	0.000127	0.0117
REGULATION_OF_GENE_EXPRESSION	GO:0010468 regulation of gene expression, GOslim:biological_process	2669	300	0.000133	0.0121
PROTEIN_DEUBIQUITINATION	GO:0016579 protein deubiquitination, GOslim:biological_process	54	16	0.000156	0.0142
REGULATION_OF_GENE_EXPRESSION,_EPIGENETIC	GO:0040029 regulation of gene expression, epigenetic, GOslim:biological_process	491	72	0.000158	0.0143
ACTIN_FILAMENT_ORGANIZATION	GO:0007015 actin filament organization, GOslim:biological_process	156	31	0.000158	0.0143
REGULATION_OF_CELL_COMMUNICATION	GO:0010646 regulation of cell communication, GOslim:biological_process	171	33	0.00016	0.0144
RNA_METABOLIC_PROCESS	GO:0016070 RNA metabolic process, GOslim:biological_process	3725	403	0.000166	0.0148
NEGATIVE_REGULATION_OF_MACROMOLECULE_METABOLIC_PROCESS	GO:0010605 negative regulation of macromolecule metabolic process, GOslim:biological_process	617	86	0.00018	0.016
CHROMOSOME_SEGREGATION	GO:0007059 chromosome segregation, GOslim:biological_process	166	32	0.000203	0.0179
CARBOXYLIC_ACID_CATABOLIC_PROCESS	GO:0046395 carboxylic acid catabolic process, GOslim:biological_process	401	61	0.000206	0.0181
ORGANIC_ACID_CATABOLIC_PROCESS	GO:0016054 organic acid catabolic process, GOslim:biological_process	401	61	0.000206	0.0181
PRIMARY_SHOOT_APICAL_MERISTEM_SPECIFICATION	GO:0010072 primary shoot apical meristem specification, GOslim:biological_process	44	14	0.000215	0.0188
REGULATION_OF_SIGNALING	GO:0023051 regulation of signaling, GOslim:biological_process	167	32	0.000222	0.0193
REGULATION_OF_SIGNAL_TRANSDUCTION	GO:0009966 regulation of signal transduction, GOslim:biological_process	167	32	0.000222	0.0193
ACTIN_NUCLEATION	GO:0045010 actin nucleation, GOslim:biological_process	102	23	0.000229	0.0197
POSTTRANSCRIPTIONAL_GENE_SILENCING_BY_RNA	GO:0035194 posttranscriptional gene silencing by RNA, GOslim:biological_process	238	41	0.000243	0.0209
REGULATION_OF_MULTI-ORGANISM_PROCESS	GO:0043900 regulation of multi-organism process, GOslim:biological_process	117	25	0.000256	0.0219
MONOCARBOXYLIC_ACID_METABOLIC_PROCESS	GO:0032787 monocarboxylic acid metabolic process, GOslim:biological_process	1480	177	0.000262	0.0223
REGULATION_OF_MACROMOLECULE_BIOSYNTHETIC_PROCESS	GO:0010556 regulation of macromolecule biosynthetic process, GOslim:biological_process	2488	279	0.000265	0.0224
PHOSPHORYLATION	GO:0016310 phosphorylation, GOslim:biological_process	1355	164	0.000266	0.0224
REGULATION_OF_NITROGEN_COMPOUND_METABOLIC_PROCESS	GO:0051171 regulation of nitrogen compound metabolic process, GOslim:biological_process	2509	281	0.00027	0.0227
REGULATION_OF_TRANSCRIPTION,_DNA-DEPENDENT	GO:0006355 regulation of transcription, DNA-dependent, GOslim:biological_process	2370	267	0.000279	0.0233
RESPONSE_TO_JASMONIC_ACID_STIMULUS	GO:0009753 response to jasmonic acid stimulus, GOslim:biological_process	471	68	0.000348	0.0289
TOXIN_CATABOLIC_PROCESS	GO:0009407 toxin catabolic process, GOslim:biological_process	211	37	0.000353	0.0291
TOXIN_METABOLIC_PROCESS	GO:0009404 toxin metabolic process, GOslim:biological_process	211	37	0.000353	0.0291
POST-EMBRYONIC_DEVELOPMENT	GO:0009791 post-embryonic development, GOslim:biological_process	2161	245	0.000361	0.0296
EMBRYONIC_MERISTEM_DEVELOPMENT	GO:0048508 embryonic meristem development, GOslim:biological_process	59	16	0.000362	0.0296
MEMBRANE_DOCKING	GO:0022406 membrane docking, GOslim:biological_process	36	12	0.000423	0.0343
VESICLE_DOCKING	GO:0048278 vesicle docking, GOslim:biological_process	36	12	0.000423	0.0343
POSTTRANSCRIPTIONAL_GENE_SILENCING	GO:0016441 posttranscriptional gene silencing, GOslim:biological_process	246	41	0.000441	0.0356
HYDROGEN_PEROXIDE_BIOSYNTHETIC_PROCESS	GO:0050665 hydrogen peroxide biosynthetic process, GOslim:biological_process	80	19	0.000448	0.036
REGULATION_OF_NUCLEOBASE-CONTAINING_COMPOUND_METABOLIC_PROCESS	GO:0019219 regulation of nucleobase-containing compound metabolic process, GOslim:biological_process	2492	277	0.000456	0.0365
DETECTION_OF_BACTERIUM	GO:0016045 detection of bacterium, GOslim:biological_process	16	8	0.000482	0.0384
PEROXISOME_ORGANIZATION	GO:0007031 peroxisome organization, GOslim:biological_process	123	25	0.000489	0.0388
VERNALIZATION_RESPONSE	GO:0010048 vernalization response, GOslim:biological_process	116	24	0.000504	0.0398
VACUOLE_ORGANIZATION	GO:0007033 vacuole organization, GOslim:biological_process	55	15	0.00052	0.0409
MERISTEM_DEVELOPMENT	GO:0048507 meristem development, GOslim:biological_process	488	69	0.000527	0.0412
CHROMATIN_MODIFICATION	GO:0016568 chromatin modification, GOslim:biological_process	444	64	0.000529	0.0412
REGULATION_OF_MACROMOLECULE_METABOLIC_PROCESS	GO:0060255 regulation of macromolecule metabolic process, GOslim:biological_process	2803	307	0.000535	0.0416
RESPONSE_TO_VIRUS	GO:0009615 response to virus, GOslim:biological_process	185	33	0.00055	0.0425
CELLULAR_AROMATIC_COMPOUND_METABOLIC_PROCESS	GO:0006725 cellular aromatic compound metabolic process, GOslim:biological_process	1017	126	0.000603	0.0465
PRODUCTION_OF_SIRNA_INVOLVED_IN_RNA_INTERFERENCE	GO:0030422 production of siRNA involved in RNA interference, GOslim:biological_process	140	27	0.000607	0.0465
TISSUE_DEVELOPMENT	GO:0009888 tissue development, GOslim:biological_process	999	124	0.000624	0.0477
EXOCYTOSIS	GO:0006887 exocytosis, GOslim:biological_process	39	12	0.000765	0.0582
MERISTEM_STRUCTURAL_ORGANIZATION	GO:0009933 meristem structural organization, GOslim:biological_process	254	41	0.000771	0.0584
REGULATION_OF_PRIMARY_METABOLIC_PROCESS	GO:0080090 regulation of primary metabolic process, GOslim:biological_process	2751	300	0.000793	0.0597
PRODUCTION_OF_SMALL_RNA_INVOLVED_IN_GENE_SILENCING_BY_RNA	GO:0070918 production of small RNA involved in gene silencing by RNA, GOslim:biological_process	143	27	0.000803	0.0597
RESPONSE_TO_DSRNA	GO:0043331 response to dsRNA, GOslim:biological_process	143	27	0.000803	0.0597
DSRNA_FRAGMENTATION	GO:0031050 dsRNA fragmentation, GOslim:biological_process	143	27	0.000803	0.0597
CELLULAR_RESPONSE_TO_DSRNA	GO:0071359 cellular response to dsRNA, GOslim:biological_process	143	27	0.000803	0.0597
GLUCURONOXYLAN_METABOLIC_PROCESS	GO:0010413 glucuronoxylan metabolic process, GOslim:biological_process	182	32	0.000818	0.0605
MODIFICATION-DEPENDENT_PROTEIN_CATABOLIC_PROCESS	GO:0019941 modification-dependent protein catabolic process, GOslim:biological_process	409	59	0.000838	0.0615
MODIFICATION-DEPENDENT_MACROMOLECULE_CATABOLIC_PROCESS	GO:0043632 modification-dependent macromolecule catabolic process, GOslim:biological_process	409	59	0.000838	0.0615
TRANSCRIPTION_FROM_RNA_POLYMERASE_II_PROMOTER	GO:0006366 transcription from RNA polymerase II promoter, GOslim:biological_process	85	19	0.000844	0.0617
REGULATION_OF_DEVELOPMENTAL_PROCESS	GO:0050793 regulation of developmental process, GOslim:biological_process	829	105	0.000863	0.0627
REGULATION_OF_CELLULAR_BIOSYNTHETIC_PROCESS	GO:0031326 regulation of cellular biosynthetic process, GOslim:biological_process	2623	287	0.000863	0.0627
XYLAN_BIOSYNTHETIC_PROCESS	GO:0045492 xylan biosynthetic process, GOslim:biological_process	183	32	0.000886	0.064
REGULATION_OF_BIOSYNTHETIC_PROCESS	GO:0009889 regulation of biosynthetic process, GOslim:biological_process	2626	287	0.000918	0.0661
ACTIN_CYTOSKELETON_ORGANIZATION	GO:0030036 actin cytoskeleton organization, GOslim:biological_process	184	32	0.000959	0.0685
NITROGEN_COMPOUND_METABOLIC_PROCESS	GO:0006807 nitrogen compound metabolic process, GOslim:biological_process	5653	578	0.000958	0.0685
PRODUCTION_OF_MIRNAS_INVOLVED_IN_GENE_SILENCING_BY_MIRNA	GO:0035196 production of miRNAs involved in gene silencing by miRNA, GOslim:biological_process	130	25	0.00098	0.0698
ANATOMICAL_STRUCTURE_ARRANGEMENT	GO:0048532 anatomical structure arrangement, GOslim:biological_process	258	41	0.00101	0.0712
REGULATION_OF_MULTICELLULAR_ORGANISMAL_PROCESS	GO:0051239 regulation of multicellular organismal process, GOslim:biological_process	684	89	0.00101	0.0712
UBIQUITIN-DEPENDENT_PROTEIN_CATABOLIC_PROCESS	GO:0006511 ubiquitin-dependent protein catabolic process, GOslim:biological_process	404	58	0.00102	0.0718
CELLULAR_COMPONENT_MACROMOLECULE_BIOSYNTHETIC_PROCESS	GO:0070589 cellular component macromolecule biosynthetic process, GOslim:biological_process	185	32	0.00104	0.0722
CELL_WALL_MACROMOLECULE_BIOSYNTHETIC_PROCESS	GO:0044038 cell wall macromolecule biosynthetic process, GOslim:biological_process	185	32	0.00104	0.0722
CELL_WALL_POLYSACCHARIDE_BIOSYNTHETIC_PROCESS	GO:0070592 cell wall polysaccharide biosynthetic process, GOslim:biological_process	185	32	0.00104	0.0722
PROTEIN_IMPORT_INTO_PEROXISOME_MATRIX	GO:0016558 protein import into peroxisome matrix, GOslim:biological_process	94	20	0.00106	0.0735
RNA_PROCESSING	GO:0006396 RNA processing, GOslim:biological_process	958	118	0.00107	0.0737
ACTIN_FILAMENT-BASED_PROCESS	GO:0030029 actin filament-based process, GOslim:biological_process	259	41	0.00107	0.074
VESICLE_DOCKING_INVOLVED_IN_EXOCYTOSIS	GO:0006904 vesicle docking involved in exocytosis, GOslim:biological_process	35	11	0.00109	0.0746
XYLAN_METABOLIC_PROCESS	GO:0045491 xylan metabolic process, GOslim:biological_process	186	32	0.00112	0.0766
VIRUS_INDUCED_GENE_SILENCING	GO:0009616 virus induced gene silencing, GOslim:biological_process	102	21	0.00116	0.0779
MODULATION_BY_SYMBIONT_OF_RNA_LEVELS_IN_HOST	GO:0052018 modulation by symbiont of RNA levels in host, GOslim:biological_process	102	21	0.00116	0.0779
CELLULAR_KETONE_METABOLIC_PROCESS	GO:0042180 cellular ketone metabolic process, GOslim:biological_process	2121	236	0.00115	0.0779
MODULATION_OF_RNA_LEVELS_IN_OTHER_ORGANISM_INVOLVED_IN_SYMBIOTIC_INTERACTION	GO:0052249 modulation of RNA levels in other organism involved in symbiotic interaction, GOslim:biological_process	102	21	0.00116	0.0779
COVALENT_CHROMATIN_MODIFICATION	GO:0016569 covalent chromatin modification, GOslim:biological_process	416	59	0.0012	0.0805
ETHYLENE_MEDIATED_SIGNALING_PATHWAY	GO:0009873 ethylene mediated signaling pathway, GOslim:biological_process	125	24	0.00125	0.0835
PROTEIN_TARGETING_TO_VACUOLE	GO:0006623 protein targeting to vacuole, GOslim:biological_process	118	23	0.00131	0.0874
PROTEIN_TARGETING_TO_PEROXISOME	GO:0006625 protein targeting to peroxisome, GOslim:biological_process	96	20	0.00132	0.0878
CARBOXYLIC_ACID_METABOLIC_PROCESS	GO:0019752 carboxylic acid metabolic process, GOslim:biological_process	2099	233	0.00138	0.091
OXOACID_METABOLIC_PROCESS	GO:0043436 oxoacid metabolic process, GOslim:biological_process	2099	233	0.00138	0.091
MERISTEM_INITIATION	GO:0010014 meristem initiation, GOslim:biological_process	165	29	0.0014	0.0922
ORGANIC_ACID_METABOLIC_PROCESS	GO:0006082 organic acid metabolic process, GOslim:biological_process	2101	233	0.00144	0.0944
SMALL_MOLECULE_METABOLIC_PROCESS	GO:0044281 small molecule metabolic process, GOslim:biological_process	4053	423	0.00146	0.0953
PEROXISOMAL_TRANSPORT	GO:0043574 peroxisomal transport, GOslim:biological_process	97	20	0.00147	0.0958
CELL_WALL_BIOGENESIS	GO:0042546 cell wall biogenesis, GOslim:biological_process	333	49	0.00153	0.099
CELLULAR_RESPONSE_TO_HORMONE_STIMULUS	GO:0032870 cellular response to hormone stimulus, GOslim:biological_process	630	82	0.00154	0.0995
MRNA_SPLICING,_VIA_SPLICEOSOME	GO:0000398 mRNA splicing, via spliceosome, GOslim:biological_process	120	23	0.00159	0.1023
PHOTOMORPHOGENESIS	GO:0009640 photomorphogenesis, GOslim:biological_process	232	37	0.00163	0.1044
TRANSCRIPTION,_DNA-DEPENDENT	GO:0006351 transcription, DNA-dependent, GOslim:biological_process	2616	283	0.0017	0.1084
LEAF_SENESCENCE	GO:0010150 leaf senescence, GOslim:biological_process	70	16	0.00172	0.1098
CELLULAR_RESPONSE_TO_ETHYLENE_STIMULUS	GO:0071369 cellular response to ethylene stimulus, GOslim:biological_process	144	26	0.00173	0.1101
PHOTOPERIODISM	GO:0009648 photoperiodism, GOslim:biological_process	168	29	0.00178	0.1127
RNA_BIOSYNTHETIC_PROCESS	GO:0032774 RNA biosynthetic process, GOslim:biological_process	2619	283	0.0018	0.1134
REGULATION_OF_CHROMOSOME_ORGANIZATION	GO:0033044 regulation of chromosome organization, GOslim:biological_process	129	24	0.0018	0.1135
REGULATION_OF_POST-EMBRYONIC_DEVELOPMENT	GO:0048580 regulation of post-embryonic development, GOslim:biological_process	453	62	0.00196	0.1228
ALDEHYDE_CATABOLIC_PROCESS	GO:0046185 aldehyde catabolic process, GOslim:biological_process	100	20	0.00201	0.1259
RESPONSE_TO_IONIZING_RADIATION	GO:0010212 response to ionizing radiation, GOslim:biological_process	93	19	0.00209	0.1301
POSITIVE_REGULATION_OF_ORGANELLE_ORGANIZATION	GO:0010638 positive regulation of organelle organization, GOslim:biological_process	58	14	0.00212	0.1317
PHOTOPERIODISM,_FLOWERING	GO:0048573 photoperiodism, flowering, GOslim:biological_process	163	28	0.00225	0.139
RESPONSE_TO_DNA_DAMAGE_STIMULUS	GO:0006974 response to DNA damage stimulus, GOslim:biological_process	350	50	0.00237	0.1462
NEGATIVE_REGULATION_OF_TWO-COMPONENT_SIGNAL_TRANSDUCTION_SYSTEM_(PHOSPHORELAY)	GO:0070298 negative regulation of two-component signal transduction system (phosphorelay), GOslim:biological_process	12	6	0.0025	0.1529
NEGATIVE_REGULATION_OF_ETHYLENE_MEDIATED_SIGNALING_PATHWAY	GO:0010105 negative regulation of ethylene mediated signaling pathway, GOslim:biological_process	12	6	0.0025	0.1529
TRICYCLIC_TRITERPENOID_METABOLIC_PROCESS	GO:0010683 tricyclic triterpenoid metabolic process, GOslim:biological_process	4	4	0.00251	0.1532
POSITIVE_REGULATION_OF_MACROMOLECULE_BIOSYNTHETIC_PROCESS	GO:0010557 positive regulation of macromolecule biosynthetic process, GOslim:biological_process	486	65	0.00254	0.1544
MODIFICATION_BY_SYMBIONT_OF_HOST_MORPHOLOGY_OR_PHYSIOLOGY	GO:0044003 modification by symbiont of host morphology or physiology, GOslim:biological_process	110	21	0.00258	0.155
MODIFICATION_OF_MORPHOLOGY_OR_PHYSIOLOGY_OF_OTHER_ORGANISM_INVOLVED_IN_SYMBIOTIC_INTERACTION	GO:0051817 modification of morphology or physiology of other organism involved in symbiotic interaction, GOslim:biological_process	110	21	0.00258	0.155
GENE_SILENCING_BY_MIRNA	GO:0035195 gene silencing by miRNA, GOslim:biological_process	181	30	0.00258	0.155
METHYLGLYOXAL_CATABOLIC_PROCESS_TO_D-LACTATE	GO:0019243 methylglyoxal catabolic process to D-lactate, GOslim:biological_process	95	19	0.00257	0.155
HEMICELLULOSE_METABOLIC_PROCESS	GO:0010410 hemicellulose metabolic process, GOslim:biological_process	198	32	0.00269	0.161
REGULATION_OF_CELLULAR_COMPONENT_ORGANIZATION	GO:0051128 regulation of cellular component organization, GOslim:biological_process	274	41	0.0027	0.161
HORMONE-MEDIATED_SIGNALING_PATHWAY	GO:0009755 hormone-mediated signaling pathway, GOslim:biological_process	589	76	0.00273	0.1623
PROTEOLYSIS	GO:0006508 proteolysis, GOslim:biological_process	940	113	0.00276	0.1635
AUTOPHAGY	GO:0006914 autophagy, GOslim:biological_process	74	16	0.00279	0.1653
METHYLGLYOXAL_METABOLIC_PROCESS	GO:0009438 methylglyoxal metabolic process, GOslim:biological_process	96	19	0.00285	0.1669
NAD_METABOLIC_PROCESS	GO:0019674 NAD metabolic process, GOslim:biological_process	8	5	0.00284	0.1669
METHYLGLYOXAL_CATABOLIC_PROCESS	GO:0051596 methylglyoxal catabolic process, GOslim:biological_process	96	19	0.00285	0.1669
NUCLEOBASE-CONTAINING_COMPOUND_METABOLIC_PROCESS	GO:0006139 nucleobase-containing compound metabolic process, GOslim:biological_process	4783	488	0.00303	0.1768
RESPONSE_TO_HORMONE_STIMULUS	GO:0009725 response to hormone stimulus, GOslim:biological_process	1364	156	0.00305	0.1776
CELLULAR_CELL_WALL_ORGANIZATION_OR_BIOGENESIS	GO:0070882 cellular cell wall organization or biogenesis, GOslim:biological_process	364	51	0.00307	0.1777
CELLULAR_RESPONSE_TO_NITROGEN_STARVATION	GO:0006995 cellular response to nitrogen starvation, GOslim:biological_process	23	8	0.00307	0.1777
DEFENSE_RESPONSE_TO_FUNGUS,_INCOMPATIBLE_INTERACTION	GO:0009817 defense response to fungus, incompatible interaction, GOslim:biological_process	41	11	0.00311	0.1793
SYMBIOSIS,_ENCOMPASSING_MUTUALISM_THROUGH_PARASITISM	GO:0044403 symbiosis, encompassing mutualism through parasitism, GOslim:biological_process	128	23	0.00325	0.1867
EMBRYO_DEVELOPMENT	GO:0009790 embryo development, GOslim:biological_process	631	80	0.00325	0.1867
CELLULAR_CELL_WALL_MACROMOLECULE_METABOLIC_PROCESS	GO:0010382 cellular cell wall macromolecule metabolic process, GOslim:biological_process	201	32	0.00329	0.1883
CELLULAR_RESPONSE_TO_HEAT	GO:0034605 cellular response to heat, GOslim:biological_process	18	7	0.00337	0.1919
POSITIVE_REGULATION_OF_MACROMOLECULE_METABOLIC_PROCESS	GO:0010604 positive regulation of macromolecule metabolic process, GOslim:biological_process	502	66	0.00338	0.1923
CELL_CYCLE_PROCESS	GO:0022402 cell cycle process, GOslim:biological_process	586	75	0.00347	0.1967
TWO-COMPONENT_SIGNAL_TRANSDUCTION_SYSTEM_(PHOSPHORELAY)	GO:0000160 two-component signal transduction system (phosphorelay), GOslim:biological_process	169	28	0.00352	0.1991
VACUOLAR_TRANSPORT	GO:0007034 vacuolar transport, GOslim:biological_process	129	23	0.00354	0.1995
PROTEOLYSIS_INVOLVED_IN_CELLULAR_PROTEIN_CATABOLIC_PROCESS	GO:0051603 proteolysis involved in cellular protein catabolic process, GOslim:biological_process	494	65	0.00355	0.1996
HEAT_ACCLIMATION	GO:0010286 heat acclimation, GOslim:biological_process	84	17	0.00379	0.2123
INTERSPECIES_INTERACTION_BETWEEN_ORGANISMS	GO:0044419 interspecies interaction between organisms, GOslim:biological_process	130	23	0.00385	0.2136
RNA_SPLICING,_VIA_TRANSESTERIFICATION_REACTIONS	GO:0000375 RNA splicing, via transesterification reactions, GOslim:biological_process	130	23	0.00385	0.2136
RNA_SPLICING,_VIA_TRANSESTERIFICATION_REACTIONS_WITH_BULGED_ADENOSINE_AS_NUCLEOPHILE	GO:0000377 RNA splicing, via transesterification reactions with bulged adenosine as nucleophile, GOslim:biological_process	130	23	0.00385	0.2136
REGULATION_OF_CELLULAR_PROTEIN_METABOLIC_PROCESS	GO:0032268 regulation of cellular protein metabolic process, GOslim:biological_process	212	33	0.0039	0.2161
DEVELOPMENTAL_PROCESS	GO:0032502 developmental process, GOslim:biological_process	4034	415	0.00396	0.2186
POSITIVE_REGULATION_OF_CELLULAR_COMPONENT_ORGANIZATION	GO:0051130 positive regulation of cellular component organization, GOslim:biological_process	63	14	0.00404	0.2225
INTERACTION_WITH_HOST	GO:0051701 interaction with host, GOslim:biological_process	123	22	0.00414	0.2269
DEFENSE_RESPONSE_TO_VIRUS	GO:0051607 defense response to virus, GOslim:biological_process	155	26	0.00416	0.2277
CELL_WALL_MACROMOLECULE_METABOLIC_PROCESS	GO:0044036 cell wall macromolecule metabolic process, GOslim:biological_process	317	45	0.00419	0.2279
CHROMATIN_ORGANIZATION	GO:0006325 chromatin organization, GOslim:biological_process	563	72	0.00419	0.2279
REPRODUCTIVE_STRUCTURE_DEVELOPMENT	GO:0048608 reproductive structure development, GOslim:biological_process	1700	188	0.00447	0.2426
POSITIVE_REGULATION_OF_FLOWER_DEVELOPMENT	GO:0009911 positive regulation of flower development, GOslim:biological_process	37	10	0.00452	0.2435
RESPONSE_TO_ARSENIC-CONTAINING_SUBSTANCE	GO:0046685 response to arsenic-containing substance, GOslim:biological_process	37	10	0.00452	0.2435
CULLIN_DENEDDYLATION	GO:0010388 cullin deneddylation, GOslim:biological_process	101	19	0.00461	0.2467
PROTEIN_DENEDDYLATION	GO:0000338 protein deneddylation, GOslim:biological_process	101	19	0.00461	0.2467
LACTATE_METABOLIC_PROCESS	GO:0006089 lactate metabolic process, GOslim:biological_process	101	19	0.00461	0.2467
RESPONSE_TO_COLD	GO:0009409 response to cold, GOslim:biological_process	622	78	0.00463	0.2471
DNA_METABOLIC_PROCESS	GO:0006259 DNA metabolic process, GOslim:biological_process	785	95	0.00483	0.2568
POSITIVE_REGULATION_OF_NUCLEOBASE-CONTAINING_COMPOUND_METABOLIC_PROCESS	GO:0045935 positive regulation of nucleobase-containing compound metabolic process, GOslim:biological_process	474	62	0.00486	0.2574
TRITERPENOID_METABOLIC_PROCESS	GO:0006722 triterpenoid metabolic process, GOslim:biological_process	44	11	0.0049	0.2588
POSITIVE_REGULATION_OF_NITROGEN_COMPOUND_METABOLIC_PROCESS	GO:0051173 positive regulation of nitrogen compound metabolic process, GOslim:biological_process	475	62	0.00506	0.2666
MEIOTIC_CHROMOSOME_SEGREGATION	GO:0045132 meiotic chromosome segregation, GOslim:biological_process	118	21	0.00526	0.2765
DNA_REPAIR	GO:0006281 DNA repair, GOslim:biological_process	305	43	0.00559	0.2931
CELLULAR_RESPONSE_TO_OSMOTIC_STRESS	GO:0071470 cellular response to osmotic stress, GOslim:biological_process	26	8	0.00565	0.2948
CELLULAR_RESPONSE_TO_OXYGEN_LEVELS	GO:0071453 cellular response to oxygen levels, GOslim:biological_process	26	8	0.00565	0.2948
RNA_SPLICING,_VIA_ENDONUCLEOLYTIC_CLEAVAGE_AND_LIGATION	GO:0000394 RNA splicing, via endonucleolytic cleavage and ligation, GOslim:biological_process	143	24	0.0057	0.2965
RNA_POLYADENYLATION	GO:0043631 RNA polyadenylation, GOslim:biological_process	10	5	0.00577	0.299
REGULATION_OF_ETHYLENE_MEDIATED_SIGNALING_PATHWAY	GO:0010104 regulation of ethylene mediated signaling pathway, GOslim:biological_process	15	6	0.00588	0.3032
REGULATION_OF_TWO-COMPONENT_SIGNAL_TRANSDUCTION_SYSTEM_(PHOSPHORELAY)	GO:0070297 regulation of two-component signal transduction system (phosphorelay), GOslim:biological_process	15	6	0.00588	0.3032
POSITIVE_REGULATION_OF_TRANSCRIPTION,_DNA-DEPENDENT	GO:0045893 positive regulation of transcription, DNA-dependent, GOslim:biological_process	462	60	0.0063	0.3242
CELL_WALL_POLYSACCHARIDE_METABOLIC_PROCESS	GO:0010383 cell wall polysaccharide metabolic process, GOslim:biological_process	229	34	0.00651	0.334
SECRETION_BY_CELL	GO:0032940 secretion by cell, GOslim:biological_process	60	13	0.00657	0.3343
REGULATION_OF_RNA_SPLICING	GO:0043484 regulation of RNA splicing, GOslim:biological_process	6	4	0.00657	0.3343
SECRETION	GO:0046903 secretion, GOslim:biological_process	60	13	0.00657	0.3343
MULTICELLULAR_ORGANISMAL_DEVELOPMENT	GO:0007275 multicellular organismal development, GOslim:biological_process	3807	390	0.00661	0.3351
AMINO_ACID_IMPORT	GO:0043090 amino acid import, GOslim:biological_process	75	15	0.00692	0.3499
PROTEIN_LIPIDATION	GO:0006497 protein lipidation, GOslim:biological_process	550	69	0.00732	0.3684
LIPOPROTEIN_BIOSYNTHETIC_PROCESS	GO:0042158 lipoprotein biosynthetic process, GOslim:biological_process	550	69	0.00732	0.3684
NEGATIVE_REGULATION_OF_SIGNALING	GO:0023057 negative regulation of signaling, GOslim:biological_process	54	12	0.00747	0.3692
POSITIVE_REGULATION_OF_RNA_METABOLIC_PROCESS	GO:0051254 positive regulation of RNA metabolic process, GOslim:biological_process	466	60	0.00738	0.3692
PROTEIN_ACYLATION	GO:0043543 protein acylation, GOslim:biological_process	560	70	0.00747	0.3692
NEGATIVE_REGULATION_OF_SIGNAL_TRANSDUCTION	GO:0009968 negative regulation of signal transduction, GOslim:biological_process	54	12	0.00747	0.3692
RESPONSE_TO_PROTEIN_STIMULUS	GO:0051789 response to protein stimulus, GOslim:biological_process	374	50	0.00741	0.3692
CELLULAR_PROTEIN_CATABOLIC_PROCESS	GO:0044257 cellular protein catabolic process, GOslim:biological_process	522	66	0.00737	0.3692
NEGATIVE_REGULATION_OF_CELL_COMMUNICATION	GO:0010648 negative regulation of cell communication, GOslim:biological_process	54	12	0.00747	0.3692
LEUCINE_METABOLIC_PROCESS	GO:0006551 leucine metabolic process, GOslim:biological_process	16	6	0.00753	0.3709
LIPOPROTEIN_METABOLIC_PROCESS	GO:0042157 lipoprotein metabolic process, GOslim:biological_process	551	69	0.00759	0.3729
CELL_PLATE_ASSEMBLY	GO:0000919 cell plate assembly, GOslim:biological_process	11	5	0.00782	0.3804
PYRIDINE_NUCLEOTIDE_BIOSYNTHETIC_PROCESS	GO:0019363 pyridine nucleotide biosynthetic process, GOslim:biological_process	11	5	0.00782	0.3804
REGULATION_OF_SYSTEMIC_ACQUIRED_RESISTANCE	GO:0010112 regulation of systemic acquired resistance, GOslim:biological_process	11	5	0.00782	0.3804
N-TERMINAL_PROTEIN_AMINO_ACID_MODIFICATION	GO:0031365 N-terminal protein amino acid modification, GOslim:biological_process	533	67	0.00782	0.3804
PROTEIN_DEPHOSPHORYLATION	GO:0006470 protein dephosphorylation, GOslim:biological_process	215	32	0.00786	0.3815
POSITIVE_REGULATION_OF_CELLULAR_METABOLIC_PROCESS	GO:0031325 positive regulation of cellular metabolic process, GOslim:biological_process	609	75	0.0079	0.3825
POSITIVE_REGULATION_OF_GENE_EXPRESSION	GO:0010628 positive regulation of gene expression, GOslim:biological_process	468	60	0.00798	0.3852
ARF_PROTEIN_SIGNAL_TRANSDUCTION	GO:0032011 ARF protein signal transduction, GOslim:biological_process	22	7	0.00816	0.392
REGULATION_OF_ARF_PROTEIN_SIGNAL_TRANSDUCTION	GO:0032012 regulation of ARF protein signal transduction, GOslim:biological_process	22	7	0.00816	0.392
NEUTRAL_AMINO_ACID_TRANSPORT	GO:0015804 neutral amino acid transport, GOslim:biological_process	77	15	0.00847	0.4055
SEED_GERMINATION	GO:0009845 seed germination, GOslim:biological_process	225	33	0.00849	0.4055
REGULATION_OF_CELL_PROLIFERATION	GO:0042127 regulation of cell proliferation, GOslim:biological_process	116	20	0.00854	0.4072
VEGETATIVE_PHASE_CHANGE	GO:0010050 vegetative phase change, GOslim:biological_process	70	14	0.00889	0.4224
PROTEIN_CATABOLIC_PROCESS	GO:0030163 protein catabolic process, GOslim:biological_process	537	67	0.00902	0.4278
CELL-CELL_SIGNALING	GO:0007267 cell-cell signaling, GOslim:biological_process	93	17	0.00905	0.4278
CELLULAR_RESPONSE_TO_CARBOHYDRATE_STIMULUS	GO:0071322 cellular response to carbohydrate stimulus, GOslim:biological_process	125	21	0.00919	0.4336
TELOMERE_MAINTENANCE	GO:0000723 telomere maintenance, GOslim:biological_process	63	13	0.00924	0.4337
TELOMERE_ORGANIZATION	GO:0032200 telomere organization, GOslim:biological_process	63	13	0.00924	0.4337
PROTEIN_HOMOTETRAMERIZATION	GO:0051289 protein homotetramerization, GOslim:biological_process	3	3	0.00939	0.4353
REGULATION_OF_MRNA_SPLICING,_VIA_SPLICEOSOME	GO:0048024 regulation of mRNA splicing, via spliceosome, GOslim:biological_process	3	3	0.00939	0.4353
ARGININE_CATABOLIC_PROCESS_TO_GLUTAMATE	GO:0019544 arginine catabolic process to glutamate, GOslim:biological_process	3	3	0.00939	0.4353
REGULATION_OF_MRNA_PROCESSING	GO:0050684 regulation of mRNA processing, GOslim:biological_process	3	3	0.00939	0.4353
THALIANOL_METABOLIC_PROCESS	GO:0080003 thalianol metabolic process, GOslim:biological_process	3	3	0.00939	0.4353
N-TERMINAL_PROTEIN_MYRISTOYLATION	GO:0006499 N-terminal protein myristoylation, GOslim:biological_process	529	66	0.0095	0.436
N-TERMINAL_PROTEIN_LIPIDATION	GO:0006498 N-terminal protein lipidation, GOslim:biological_process	529	66	0.0095	0.436
PROTEIN_MYRISTOYLATION	GO:0018377 protein myristoylation, GOslim:biological_process	529	66	0.0095	0.436
MAINTENANCE_OF_MERISTEM_IDENTITY	GO:0010074 maintenance of meristem identity, GOslim:biological_process	56	12	0.00949	0.436
NAD_BIOSYNTHETIC_PROCESS	GO:0009435 NAD biosynthetic process, GOslim:biological_process	7	4	0.00966	0.4402
DEMETHYLATION	GO:0070988 demethylation, GOslim:biological_process	7	4	0.00966	0.4402
NUCLEOTIDE_SALVAGE	GO:0043173 nucleotide salvage, GOslim:biological_process	7	4	0.00966	0.4402
CELL_DIVISION	GO:0051301 cell division, GOslim:biological_process	362	48	0.00973	0.4423
DEPHOSPHORYLATION	GO:0016311 dephosphorylation, GOslim:biological_process	246	35	0.0102	0.4645
POSITIVE_REGULATION_OF_METABOLIC_PROCESS	GO:0009893 positive regulation of metabolic process, GOslim:biological_process	617	75	0.0103	0.4649
ANATOMICAL_STRUCTURE_HOMEOSTASIS	GO:0060249 anatomical structure homeostasis, GOslim:biological_process	64	13	0.0103	0.4649
RESPONSE_TO_XENOBIOTIC_STIMULUS	GO:0009410 response to xenobiotic stimulus, GOslim:biological_process	87	16	0.0106	0.477
PRODUCTION_OF_TA-SIRNAS_INVOLVED_IN_RNA_INTERFERENCE	GO:0010267 production of ta-siRNAs involved in RNA interference, GOslim:biological_process	111	19	0.0109	0.4878
CELLULAR_NITROGEN_COMPOUND_CATABOLIC_PROCESS	GO:0044270 cellular nitrogen compound catabolic process, GOslim:biological_process	88	16	0.0116	0.5191
RESPONSE_TO_FREEZING	GO:0050826 response to freezing, GOslim:biological_process	96	17	0.0117	0.5237
REGULATION_OF_MITOTIC_CELL_CYCLE	GO:0007346 regulation of mitotic cell cycle, GOslim:biological_process	112	19	0.0117	0.5237
RESPONSE_TO_WATER_DEPRIVATION	GO:0009414 response to water deprivation, GOslim:biological_process	413	53	0.0119	0.5274
CELLULAR_RESPONSE_TO_HYPOXIA	GO:0071456 cellular response to hypoxia, GOslim:biological_process	24	7	0.0119	0.5281
RESPONSE_TO_NITRATE	GO:0010167 response to nitrate, GOslim:biological_process	197	29	0.0124	0.5508
RESPONSE_TO_RED_OR_FAR_RED_LIGHT	GO:0009639 response to red or far red light, GOslim:biological_process	405	52	0.0125	0.5512
REGULATION_OF_FLOWER_DEVELOPMENT	GO:0009909 regulation of flower development, GOslim:biological_process	359	47	0.0126	0.5571
POSITIVE_REGULATION_OF_CELLULAR_BIOSYNTHETIC_PROCESS	GO:0031328 positive regulation of cellular biosynthetic process, GOslim:biological_process	595	72	0.0128	0.5618
POSITIVE_REGULATION_OF_BIOSYNTHETIC_PROCESS	GO:0009891 positive regulation of biosynthetic process, GOslim:biological_process	595	72	0.0128	0.5618
EMBRYO_DEVELOPMENT_ENDING_IN_SEED_DORMANCY	GO:0009793 embryo development ending in seed dormancy, GOslim:biological_process	557	68	0.0129	0.5659
PROLINE_TRANSPORT	GO:0015824 proline transport, GOslim:biological_process	74	14	0.0132	0.578
NITRATE_TRANSPORT	GO:0015706 nitrate transport, GOslim:biological_process	207	30	0.0134	0.5822
HISTONE_H3-K4_METHYLATION	GO:0051568 histone H3-K4 methylation, GOslim:biological_process	8	4	0.0135	0.5891
PHYLLOME_DEVELOPMENT	GO:0048827 phyllome development, GOslim:biological_process	492	61	0.0136	0.5921
POSITIVE_REGULATION_OF_POST-EMBRYONIC_DEVELOPMENT	GO:0048582 positive regulation of post-embryonic development, GOslim:biological_process	52	11	0.0137	0.5941
REGULATION_OF_PROTEIN_METABOLIC_PROCESS	GO:0051246 regulation of protein metabolic process, GOslim:biological_process	234	33	0.0138	0.5941
EMBRYO_SAC_EGG_CELL_DIFFERENTIATION	GO:0009560 embryo sac egg cell differentiation, GOslim:biological_process	139	22	0.0139	0.5976
CELLULAR_RESPONSE_TO_WATER_DEPRIVATION	GO:0042631 cellular response to water deprivation, GOslim:biological_process	67	13	0.014	0.6031
RNA_3'-END_PROCESSING	GO:0031123 RNA 3'-end processing, GOslim:biological_process	25	7	0.0142	0.606
TRICHOME_BRANCHING	GO:0010091 trichome branching, GOslim:biological_process	25	7	0.0142	0.606
LEAF_DEVELOPMENT	GO:0048366 leaf development, GOslim:biological_process	446	56	0.0143	0.609
REGULATION_OF_PROTEIN_MODIFICATION_PROCESS	GO:0031399 regulation of protein modification process, GOslim:biological_process	148	23	0.0144	0.6123
RESPONSE_TO_ETHYLENE_STIMULUS	GO:0009723 response to ethylene stimulus, GOslim:biological_process	353	46	0.0144	0.6123
CELLULAR_RESPONSE_TO_SALT_STRESS	GO:0071472 cellular response to salt stress, GOslim:biological_process	19	6	0.0144	0.6123
RESPONSE_TO_GAMMA_RADIATION	GO:0010332 response to gamma radiation, GOslim:biological_process	75	14	0.0145	0.6151
POSITIVE_REGULATION_OF_DEVELOPMENTAL_PROCESS	GO:0051094 positive regulation of developmental process, GOslim:biological_process	60	12	0.0148	0.6232
CELLULAR_RESPONSE_TO_NITROGEN_LEVELS	GO:0043562 cellular response to nitrogen levels, GOslim:biological_process	32	8	0.0154	0.6369
PROTEIN_DEMETHYLATION	GO:0006482 protein demethylation, GOslim:biological_process	4	3	0.0154	0.6369
CELLULAR_RESPONSE_TO_PROTEIN_STIMULUS	GO:0071445 cellular response to protein stimulus, GOslim:biological_process	192	28	0.0153	0.6369
PRIMARY_MIRNA_PROCESSING	GO:0031053 primary miRNA processing, GOslim:biological_process	4	3	0.0154	0.6369
CARBOXYLIC_ACID_BIOSYNTHETIC_PROCESS	GO:0046394 carboxylic acid biosynthetic process, GOslim:biological_process	1113	124	0.0153	0.6369
HISTONE_DEMETHYLATION	GO:0016577 histone demethylation, GOslim:biological_process	4	3	0.0154	0.6369
ORGANIC_ACID_BIOSYNTHETIC_PROCESS	GO:0016053 organic acid biosynthetic process, GOslim:biological_process	1113	124	0.0153	0.6369
BRANCHED-CHAIN_AMINO_ACID_METABOLIC_PROCESS	GO:0009081 branched-chain amino acid metabolic process, GOslim:biological_process	32	8	0.0154	0.6369
PROTEIN_DEALKYLATION	GO:0008214 protein dealkylation, GOslim:biological_process	4	3	0.0154	0.6369
HISTONE_LYSINE_DEMETHYLATION	GO:0070076 histone lysine demethylation, GOslim:biological_process	4	3	0.0154	0.6369
INTRA-GOLGI_VESICLE-MEDIATED_TRANSPORT	GO:0006891 intra-Golgi vesicle-mediated transport, GOslim:biological_process	68	13	0.0155	0.6378
REGULATION_OF_CIRCADIAN_RHYTHM	GO:0042752 regulation of circadian rhythm, GOslim:biological_process	46	10	0.0158	0.6484
FEMALE_GAMETE_GENERATION	GO:0007292 female gamete generation, GOslim:biological_process	141	22	0.0158	0.65
RESPONSE_TO_WATER_STIMULUS	GO:0009415 response to water stimulus, GOslim:biological_process	421	53	0.0161	0.6574
CARBOHYDRATE_METABOLIC_PROCESS	GO:0005975 carbohydrate metabolic process, GOslim:biological_process	2239	234	0.0162	0.6607
COFACTOR_CATABOLIC_PROCESS	GO:0051187 cofactor catabolic process, GOslim:biological_process	92	16	0.0163	0.6638
HISTONE_DEACETYLATION	GO:0016575 histone deacetylation, GOslim:biological_process	14	5	0.0169	0.6877
NEGATIVE_REGULATION_OF_CELL_DIFFERENTIATION	GO:0045596 negative regulation of cell differentiation, GOslim:biological_process	69	13	0.017	0.6903
METHYLATION-DEPENDENT_CHROMATIN_SILENCING	GO:0006346 methylation-dependent chromatin silencing, GOslim:biological_process	117	19	0.017	0.6903
RESPONSE_TO_UNFOLDED_PROTEIN	GO:0006986 response to unfolded protein, GOslim:biological_process	186	27	0.0179	0.7204
CELLULAR_RESPONSE_TO_UNFOLDED_PROTEIN	GO:0034620 cellular response to unfolded protein, GOslim:biological_process	186	27	0.0179	0.7204
CELLULAR_RESPONSE_TO_INORGANIC_SUBSTANCE	GO:0071241 cellular response to inorganic substance, GOslim:biological_process	40	9	0.018	0.7241
CELLULAR_RESPONSE_TO_BIOTIC_STIMULUS	GO:0071216 cellular response to biotic stimulus, GOslim:biological_process	195	28	0.0181	0.7241
PORPHYRIN-CONTAINING_COMPOUND_CATABOLIC_PROCESS	GO:0006787 porphyrin-containing compound catabolic process, GOslim:biological_process	62	12	0.0181	0.7241
TETRAPYRROLE_CATABOLIC_PROCESS	GO:0033015 tetrapyrrole catabolic process, GOslim:biological_process	62	12	0.0181	0.7241
LEUCINE_BIOSYNTHETIC_PROCESS	GO:0009098 leucine biosynthetic process, GOslim:biological_process	9	4	0.0183	0.7288
NICOTINAMIDE_NUCLEOTIDE_BIOSYNTHETIC_PROCESS	GO:0019359 nicotinamide nucleotide biosynthetic process, GOslim:biological_process	9	4	0.0183	0.7288
REGULATION_OF_PROTEIN_DEPHOSPHORYLATION	GO:0035304 regulation of protein dephosphorylation, GOslim:biological_process	135	21	0.0186	0.7388
M_PHASE	GO:0000279 M phase, GOslim:biological_process	304	40	0.0188	0.7456
PROTEASOMAL_UBIQUITIN-DEPENDENT_PROTEIN_CATABOLIC_PROCESS	GO:0043161 proteasomal ubiquitin-dependent protein catabolic process, GOslim:biological_process	127	20	0.0191	0.7553
CALCIUM-MEDIATED_SIGNALING	GO:0019722 calcium-mediated signaling, GOslim:biological_process	55	11	0.0191	0.7553
POLLEN_GERMINATION	GO:0009846 pollen germination, GOslim:biological_process	48	10	0.0199	0.784
RESPONSE_TO_OXYGEN_LEVELS	GO:0070482 response to oxygen levels, GOslim:biological_process	103	17	0.0204	0.7932
PENTACYCLIC_TRITERPENOID_BIOSYNTHETIC_PROCESS	GO:0019745 pentacyclic triterpenoid biosynthetic process, GOslim:biological_process	41	9	0.0204	0.7932
ENDOSOMAL_TRANSPORT	GO:0016197 endosomal transport, GOslim:biological_process	34	8	0.0204	0.7932
ACTIVATION_OF_IMMUNE_RESPONSE	GO:0002253 activation of immune response, GOslim:biological_process	34	8	0.0204	0.7932
PENTACYCLIC_TRITERPENOID_METABOLIC_PROCESS	GO:0019742 pentacyclic triterpenoid metabolic process, GOslim:biological_process	41	9	0.0204	0.7932
LEAF_MORPHOGENESIS	GO:0009965 leaf morphogenesis, GOslim:biological_process	343	44	0.0204	0.7932
ACTIVATION_OF_INNATE_IMMUNE_RESPONSE	GO:0002218 activation of innate immune response, GOslim:biological_process	34	8	0.0204	0.7932
ORGAN_DEVELOPMENT	GO:0048513 organ development, GOslim:biological_process	2037	213	0.0208	0.8027
SYSTEM_DEVELOPMENT	GO:0048731 system development, GOslim:biological_process	2037	213	0.0208	0.8027
REGULATION_OF_RESPONSE_TO_BIOTIC_STIMULUS	GO:0002831 regulation of response to biotic stimulus, GOslim:biological_process	15	5	0.021	0.812
REGULATION_OF_DEPHOSPHORYLATION	GO:0035303 regulation of dephosphorylation, GOslim:biological_process	137	21	0.0212	0.8149
RESPONSE_TO_STARVATION	GO:0042594 response to starvation, GOslim:biological_process	308	40	0.0222	0.855
MERISTEM_MAINTENANCE	GO:0010073 meristem maintenance, GOslim:biological_process	281	37	0.0229	0.8782
TRITERPENOID_BIOSYNTHETIC_PROCESS	GO:0016104 triterpenoid biosynthetic process, GOslim:biological_process	42	9	0.023	0.8809
FARNESYL_DIPHOSPHATE_METABOLIC_PROCESS	GO:0045338 farnesyl diphosphate metabolic process, GOslim:biological_process	5	3	0.0232	0.8817
MIRNA_CATABOLIC_PROCESS	GO:0010587 miRNA catabolic process, GOslim:biological_process	5	3	0.0232	0.8817
PROTEIN_TETRAMERIZATION	GO:0051262 protein tetramerization, GOslim:biological_process	5	3	0.0232	0.8817
SMALL_MOLECULE_CATABOLIC_PROCESS	GO:0044282 small molecule catabolic process, GOslim:biological_process	931	104	0.0233	0.883
LIPID_LOCALIZATION	GO:0010876 lipid localization, GOslim:biological_process	282	37	0.0239	0.9056
EMBRYONIC_MORPHOGENESIS	GO:0048598 embryonic morphogenesis, GOslim:biological_process	10	4	0.024	0.9068
STEM_CELL_MAINTENANCE	GO:0019827 stem cell maintenance, GOslim:biological_process	65	12	0.0242	0.912
DEVELOPMENTAL_PROCESS_INVOLVED_IN_REPRODUCTION	GO:0003006 developmental process involved in reproduction, GOslim:biological_process	2026	211	0.0243	0.9139
CARBOHYDRATE_MEDIATED_SIGNALING	GO:0009756 carbohydrate mediated signaling, GOslim:biological_process	114	18	0.0248	0.9287
SUGAR_MEDIATED_SIGNALING_PATHWAY	GO:0010182 sugar mediated signaling pathway, GOslim:biological_process	114	18	0.0248	0.9287
AUXIN_HOMEOSTASIS	GO:0010252 auxin homeostasis, GOslim:biological_process	22	6	0.0248	0.9293
POSITIVE_REGULATION_OF_IMMUNE_RESPONSE	GO:0050778 positive regulation of immune response, GOslim:biological_process	43	9	0.0258	0.948
CHLOROPHYLL_CATABOLIC_PROCESS	GO:0015996 chlorophyll catabolic process, GOslim:biological_process	58	11	0.0259	0.948
POSITIVE_REGULATION_OF_CELL_DEATH	GO:0010942 positive regulation of cell death, GOslim:biological_process	16	5	0.0258	0.948
PIGMENT_CATABOLIC_PROCESS	GO:0046149 pigment catabolic process, GOslim:biological_process	58	11	0.0259	0.948
POSITIVE_REGULATION_OF_INNATE_IMMUNE_RESPONSE	GO:0045089 positive regulation of innate immune response, GOslim:biological_process	43	9	0.0258	0.948
D-RIBOSE_METABOLIC_PROCESS	GO:0006014 D-ribose metabolic process, GOslim:biological_process	16	5	0.0258	0.948
BRANCHED-CHAIN_AMINO_ACID_BIOSYNTHETIC_PROCESS	GO:0009082 branched-chain amino acid biosynthetic process, GOslim:biological_process	16	5	0.0258	0.948
REGULATION_OF_BIOLOGICAL_QUALITY	GO:0065008 regulation of biological quality, GOslim:biological_process	1637	173	0.0257	0.948
POSITIVE_REGULATION_OF_IMMUNE_SYSTEM_PROCESS	GO:0002684 positive regulation of immune system process, GOslim:biological_process	43	9	0.0258	0.948
PROTEIN_DEACETYLATION	GO:0006476 protein deacetylation, GOslim:biological_process	16	5	0.0258	0.948
REGULATION_OF_ARF_GTPASE_ACTIVITY	GO:0032312 regulation of ARF GTPase activity, GOslim:biological_process	16	5	0.0258	0.948
WATER-SOLUBLE_VITAMIN_METABOLIC_PROCESS	GO:0006767 water-soluble vitamin metabolic process, GOslim:biological_process	98	16	0.0259	0.9488
INORGANIC_ANION_TRANSPORT	GO:0015698 inorganic anion transport, GOslim:biological_process	266	35	0.0265	0.9657
STEM_CELL_DEVELOPMENT	GO:0048864 stem cell development, GOslim:biological_process	66	12	0.0265	0.9657
ACTIVATION_OF_SIGNALING_PROTEIN_ACTIVITY_INVOLVED_IN_UNFOLDED_PROTEIN_RESPONSE	GO:0006987 activation of signaling protein activity involved in unfolded protein response, GOslim:biological_process	1	1	0.1589	1
TERMINATION_OF_G-PROTEIN_COUPLED_RECEPTOR_SIGNALING_PATHWAY	GO:0038032 termination of G-protein coupled receptor signaling pathway, GOslim:biological_process	3	1	0.2925	1
ER_TO_GOLGI_VESICLE-MEDIATED_TRANSPORT	GO:0006888 ER to Golgi vesicle-mediated transport, GOslim:biological_process	105	16	0.042	1
ADAXIAL/ABAXIAL_AXIS_SPECIFICATION	GO:0009943 adaxial/abaxial axis specification, GOslim:biological_process	81	9	0.3288	1
MRNA_METHYLATION	GO:0080009 mRNA methylation, GOslim:biological_process	1	1	0.1589	1
HISTONE_LYSINE_METHYLATION	GO:0034968 histone lysine methylation, GOslim:biological_process	242	17	0.8716	1
AMINE_CATABOLIC_PROCESS	GO:0009310 amine catabolic process, GOslim:biological_process	213	18	0.6425	1
CELLULAR_METABOLIC_COMPOUND_SALVAGE	GO:0043094 cellular metabolic compound salvage, GOslim:biological_process	185	13	0.8446	1
REGULATION_OF_EPIDERMIS_DEVELOPMENT	GO:0045682 regulation of epidermis development, GOslim:biological_process	6	2	0.1376	1
ARGININE_METABOLIC_PROCESS	GO:0006525 arginine metabolic process, GOslim:biological_process	15	3	0.1832	1
DIPEPTIDE_TRANSPORT	GO:0042938 dipeptide transport, GOslim:biological_process	4	1	0.3511	1
POLYOL_METABOLIC_PROCESS	GO:0019751 polyol metabolic process, GOslim:biological_process	136	10	0.7782	1
CELLULAR_RESPONSE_TO_METAL_ION	GO:0071248 cellular response to metal ion, GOslim:biological_process	37	8	0.0299	1
POLYSACCHARIDE_LOCALIZATION	GO:0033037 polysaccharide localization, GOslim:biological_process	94	5	0.9209	1
VESICLE_FUSION	GO:0006906 vesicle fusion, GOslim:biological_process	1	1	0.1589	1
NEGATIVE_REGULATION_OF_GENE_SILENCING	GO:0060969 negative regulation of gene silencing, GOslim:biological_process	1	1	0.1589	1
FRUIT_MORPHOGENESIS	GO:0048530 fruit morphogenesis, GOslim:biological_process	4	1	0.3511	1
STOMATAL_COMPLEX_DEVELOPMENT	GO:0010374 stomatal complex development, GOslim:biological_process	216	9	0.9965	1
LOCOMOTION	GO:0040011 locomotion, GOslim:biological_process	25	1	0.8946	1
RESPONSE_TO_FAR_RED_LIGHT	GO:0010218 response to far red light, GOslim:biological_process	98	2	0.9983	1
TETRAHYDROFOLYLPOLYGLUTAMATE_BIOSYNTHETIC_PROCESS	GO:0046901 tetrahydrofolylpolyglutamate biosynthetic process, GOslim:biological_process	1	1	0.1589	1
SEXUAL_REPRODUCTION	GO:0019953 sexual reproduction, GOslim:biological_process	245	25	0.3104	1
MOVEMENT_IN_OTHER_ORGANISM_INVOLVED_IN_SYMBIOTIC_INTERACTION	GO:0051814 movement in other organism involved in symbiotic interaction, GOslim:biological_process	8	1	0.541	1
ATP_BIOSYNTHETIC_PROCESS	GO:0006754 ATP biosynthetic process, GOslim:biological_process	72	4	0.8845	1
ALDITOL_BIOSYNTHETIC_PROCESS	GO:0019401 alditol biosynthetic process, GOslim:biological_process	14	1	0.7269	1
DETECTION_OF_ABIOTIC_STIMULUS	GO:0009582 detection of abiotic stimulus, GOslim:biological_process	27	2	0.7055	1
RESPONSE_TO_AUXIN_STIMULUS	GO:0009733 response to auxin stimulus, GOslim:biological_process	425	35	0.7265	1
SHORT-DAY_PHOTOPERIODISM,_FLOWERING	GO:0048575 short-day photoperiodism, flowering, GOslim:biological_process	8	1	0.541	1
PEPTIDYL-TYROSINE_DEPHOSPHORYLATION	GO:0035335 peptidyl-tyrosine dephosphorylation, GOslim:biological_process	1	1	0.1589	1
VITAMIN_METABOLIC_PROCESS	GO:0006766 vitamin metabolic process, GOslim:biological_process	153	18	0.1754	1
OXALATE_METABOLIC_PROCESS	GO:0033609 oxalate metabolic process, GOslim:biological_process	1	1	0.1589	1
NUCLEOTIDE-SUGAR_TRANSPORT	GO:0015780 nucleotide-sugar transport, GOslim:biological_process	15	1	0.7495	1
NEGATIVE_REGULATION_OF_MOLECULAR_FUNCTION,_EPIGENETIC	GO:0045857 negative regulation of molecular function, epigenetic, GOslim:biological_process	2	2	0.0368	1
MALE_MEIOSIS	GO:0007140 male meiosis, GOslim:biological_process	21	2	0.5791	1
CELLULAR_RESPONSE_TO_SUPEROXIDE	GO:0071451 cellular response to superoxide, GOslim:biological_process	12	1	0.6753	1
VESICLE_COATING	GO:0006901 vesicle coating, GOslim:biological_process	14	2	0.3872	1
PHENYLPROPANOID_METABOLIC_PROCESS	GO:0009698 phenylpropanoid metabolic process, GOslim:biological_process	400	37	0.4706	1
MOVEMENT_IN_ENVIRONMENT_OF_OTHER_ORGANISM_INVOLVED_IN_SYMBIOTIC_INTERACTION	GO:0052192 movement in environment of other organism involved in symbiotic interaction, GOslim:biological_process	8	1	0.541	1
RESPONSE_TO_BLUE_LIGHT	GO:0009637 response to blue light, GOslim:biological_process	126	3	0.9989	1
VITAMIN_K_METABOLIC_PROCESS	GO:0042373 vitamin K metabolic process, GOslim:biological_process	9	1	0.579	1
RRNA_PROCESSING	GO:0006364 rRNA processing, GOslim:biological_process	323	7	1	1
SULFATE_ION_HOMEOSTASIS	GO:0055063 sulfate ion homeostasis, GOslim:biological_process	1	1	0.1589	1
POSITIVE_REGULATION_OF_PROTEIN_KINASE_ACTIVITY	GO:0045860 positive regulation of protein kinase activity, GOslim:biological_process	13	2	0.3565	1
ABSCISIC_ACID_MEDIATED_SIGNALING_PATHWAY	GO:0009738 abscisic acid mediated signaling pathway, GOslim:biological_process	252	29	0.1299	1
REPRODUCTION	GO:0000003 reproduction, GOslim:biological_process	2245	228	0.0447	1
RESPONSE_TO_SYMBIOTIC_FUNGUS	GO:0009610 response to symbiotic fungus, GOslim:biological_process	38	7	0.0754	1
REGULATION_OF_ETHYLENE_BIOSYNTHETIC_PROCESS	GO:0010364 regulation of ethylene biosynthetic process, GOslim:biological_process	5	1	0.4049	1
STARCH_BIOSYNTHETIC_PROCESS	GO:0019252 starch biosynthetic process, GOslim:biological_process	191	10	0.9741	1
PHYLLOQUINONE_BIOSYNTHETIC_PROCESS	GO:0042372 phylloquinone biosynthetic process, GOslim:biological_process	8	1	0.541	1
VACUOLAR_PROTEIN_PROCESSING	GO:0006624 vacuolar protein processing, GOslim:biological_process	4	1	0.3511	1
CELLULAR_ALKANE_METABOLIC_PROCESS	GO:0043446 cellular alkane metabolic process, GOslim:biological_process	3	1	0.2925	1
REGULATION_OF_METALLOENZYME_ACTIVITY	GO:0048552 regulation of metalloenzyme activity, GOslim:biological_process	3	1	0.2925	1
PROTEIN_LOCALIZATION_TO_ORGANELLE	GO:0033365 protein localization to organelle, GOslim:biological_process	271	20	0.838	1
RESPONSE_TO_DISACCHARIDE_STIMULUS	GO:0034285 response to disaccharide stimulus, GOslim:biological_process	212	15	0.8523	1
REGULATION_OF_NITRATE_ASSIMILATION	GO:0090352 regulation of nitrate assimilation, GOslim:biological_process	1	1	0.1589	1
CELLULAR_MEMBRANE_ORGANIZATION	GO:0016044 cellular membrane organization, GOslim:biological_process	543	64	0.0279	1
SPERMIDINE_BIOSYNTHETIC_PROCESS	GO:0008295 spermidine biosynthetic process, GOslim:biological_process	14	1	0.7269	1
REGULATION_OF_ACTIN_CYTOSKELETON_ORGANIZATION	GO:0032956 regulation of actin cytoskeleton organization, GOslim:biological_process	22	5	0.0679	1
HETEROCYCLE_CATABOLIC_PROCESS	GO:0046700 heterocycle catabolic process, GOslim:biological_process	266	30	0.1465	1
POSITIVE_REGULATION_OF_CELL_CYCLE_PROCESS	GO:0090068 positive regulation of cell cycle process, GOslim:biological_process	13	2	0.3565	1
REGULATION_OF_ANTHOCYANIN_BIOSYNTHETIC_PROCESS	GO:0031540 regulation of anthocyanin biosynthetic process, GOslim:biological_process	18	1	0.8068	1
HETEROCYCLE_BIOSYNTHETIC_PROCESS	GO:0018130 heterocycle biosynthetic process, GOslim:biological_process	255	13	0.9894	1
PROTEIN_STABILIZATION	GO:0050821 protein stabilization, GOslim:biological_process	6	2	0.1376	1
SUBERIN_BIOSYNTHETIC_PROCESS	GO:0010345 suberin biosynthetic process, GOslim:biological_process	10	1	0.6139	1
CYSTEINE_BIOSYNTHETIC_PROCESS_FROM_SERINE	GO:0006535 cysteine biosynthetic process from serine, GOslim:biological_process	14	2	0.3872	1
RESPONSE_TO_UV	GO:0009411 response to UV, GOslim:biological_process	247	21	0.6382	1
POSITIVE_REGULATION_OF_INTRACELLULAR_PROTEIN_TRANSPORT	GO:0090316 positive regulation of intracellular protein transport, GOslim:biological_process	1	1	0.1589	1
NEGATIVE_REGULATION_OF_PROTEIN_COMPLEX_DISASSEMBLY	GO:0043242 negative regulation of protein complex disassembly, GOslim:biological_process	9	1	0.579	1
CALCIUM_ION_TRANSPORT	GO:0006816 calcium ion transport, GOslim:biological_process	121	14	0.2282	1
RESPONSE_TO_TOXIN	GO:0009636 response to toxin, GOslim:biological_process	20	3	0.2966	1
REGULATION_OF_RAS_PROTEIN_SIGNAL_TRANSDUCTION	GO:0046578 regulation of Ras protein signal transduction, GOslim:biological_process	46	8	0.0755	1
REGULATION_OF_ABSCISIC_ACID_MEDIATED_SIGNALING_PATHWAY	GO:0009787 regulation of abscisic acid mediated signaling pathway, GOslim:biological_process	53	7	0.2269	1
PYRIMIDINE_NUCLEOTIDE_SALVAGE	GO:0032262 pyrimidine nucleotide salvage, GOslim:biological_process	2	1	0.2286	1
REGULATION_OF_RAS_GTPASE_ACTIVITY	GO:0032318 regulation of Ras GTPase activity, GOslim:biological_process	40	6	0.1782	1
GUANOSINE_METABOLIC_PROCESS	GO:0008617 guanosine metabolic process, GOslim:biological_process	6	2	0.1376	1
RESPONSE_TO_JASMONIC_ACID_STIMULUS_INVOLVED_IN_JASMONIC_ACID_AND_ETHYLENE-DEPENDENT_SYSTEMIC_RESISTANCE	GO:0032260 response to jasmonic acid stimulus involved in jasmonic acid and ethylene-dependent systemic resistance, GOslim:biological_process	3	1	0.2925	1
REGULATION_OF_MOLECULAR_FUNCTION,_EPIGENETIC	GO:0040030 regulation of molecular function, epigenetic, GOslim:biological_process	2	2	0.0368	1
POLLEN_WALL_ASSEMBLY	GO:0010208 pollen wall assembly, GOslim:biological_process	60	2	0.9692	1
NEGATIVE_REGULATION_OF_ACTIN_FILAMENT_POLYMERIZATION	GO:0030837 negative regulation of actin filament polymerization, GOslim:biological_process	7	1	0.4995	1
PURINE_NUCLEOSIDE_CATABOLIC_PROCESS	GO:0006152 purine nucleoside catabolic process, GOslim:biological_process	5	1	0.4049	1
NUCLEOBASE_CATABOLIC_PROCESS	GO:0046113 nucleobase catabolic process, GOslim:biological_process	4	1	0.3511	1
PROLINE_METABOLIC_PROCESS	GO:0006560 proline metabolic process, GOslim:biological_process	12	1	0.6753	1
PYRIMIDINE_NUCLEOTIDE_METABOLIC_PROCESS	GO:0006220 pyrimidine nucleotide metabolic process, GOslim:biological_process	154	3	0.9999	1
PROTEASOME_CORE_COMPLEX_ASSEMBLY	GO:0080129 proteasome core complex assembly, GOslim:biological_process	126	15	0.191	1
POSITIVE_REGULATION_OF_METALLOENZYME_ACTIVITY	GO:0048554 positive regulation of metalloenzyme activity, GOslim:biological_process	3	1	0.2925	1
CHLOROPLAST-NUCLEUS_SIGNALING_PATHWAY	GO:0010019 chloroplast-nucleus signaling pathway, GOslim:biological_process	6	1	0.4542	1
ACETATE_BIOSYNTHETIC_PROCESS_FROM_CARBON_MONOXIDE	GO:0019415 acetate biosynthetic process from carbon monoxide, GOslim:biological_process	3	1	0.2925	1
MITOSIS	GO:0007067 mitosis, GOslim:biological_process	67	11	0.0563	1
CHLOROPLAST_ORGANIZATION	GO:0009658 chloroplast organization, GOslim:biological_process	236	4	1	1
AUXIN_TRANSPORT	GO:0060918 auxin transport, GOslim:biological_process	99	6	0.8762	1
FERMENTATION	GO:0006113 fermentation, GOslim:biological_process	27	2	0.7055	1
VALINE_METABOLIC_PROCESS	GO:0006573 valine metabolic process, GOslim:biological_process	5	2	0.109	1
DEFENSE_RESPONSE_BY_CELL_WALL_THICKENING	GO:0052482 defense response by cell wall thickening, GOslim:biological_process	16	1	0.7703	1
POSITIVE_REGULATION_OF_TRANSPORT	GO:0051050 positive regulation of transport, GOslim:biological_process	3	1	0.2925	1
REGULATION_OF_CYTOKININ_MEDIATED_SIGNALING_PATHWAY	GO:0080036 regulation of cytokinin mediated signaling pathway, GOslim:biological_process	6	1	0.4542	1
TRANSCRIPTION_ELONGATION_FROM_RNA_POLYMERASE_II_PROMOTER	GO:0006368 transcription elongation from RNA polymerase II promoter, GOslim:biological_process	4	1	0.3511	1
RESPONSE_TO_MECHANICAL_STIMULUS	GO:0009612 response to mechanical stimulus, GOslim:biological_process	63	10	0.0781	1
CHLOROPLAST_AVOIDANCE_MOVEMENT	GO:0009903 chloroplast avoidance movement, GOslim:biological_process	8	1	0.541	1
PROTEIN_UBIQUITINATION_INVOLVED_IN_UBIQUITIN-DEPENDENT_PROTEIN_CATABOLIC_PROCESS	GO:0042787 protein ubiquitination involved in ubiquitin-dependent protein catabolic process, GOslim:biological_process	12	3	0.1223	1
(1->3)-BETA-D-GLUCAN_METABOLIC_PROCESS	GO:0006074 (1->3)-beta-D-glucan metabolic process, GOslim:biological_process	13	2	0.3565	1
REGULATION_OF_TELOMERE_MAINTENANCE_VIA_TELOMERASE	GO:0032210 regulation of telomere maintenance via telomerase, GOslim:biological_process	2	1	0.2286	1
PURINE_RIBONUCLEOTIDE_BIOSYNTHETIC_PROCESS	GO:0009152 purine ribonucleotide biosynthetic process, GOslim:biological_process	95	4	0.9686	1
CELL_DIFFERENTIATION	GO:0030154 cell differentiation, GOslim:biological_process	1116	103	0.4323	1
PURINE_NUCLEOTIDE_TRANSPORT	GO:0015865 purine nucleotide transport, GOslim:biological_process	10	1	0.6139	1
EMBRYONIC_ROOT_MORPHOGENESIS	GO:0010086 embryonic root morphogenesis, GOslim:biological_process	2	1	0.2286	1
STAMEN_FORMATION	GO:0048455 stamen formation, GOslim:biological_process	5	1	0.4049	1
IMMUNE_RESPONSE-REGULATING_SIGNALING_PATHWAY	GO:0002764 immune response-regulating signaling pathway, GOslim:biological_process	2	1	0.2286	1
THIAMINE_DIPHOSPHATE_BIOSYNTHETIC_PROCESS	GO:0009229 thiamine diphosphate biosynthetic process, GOslim:biological_process	2	1	0.2286	1
SMALL_MOLECULE_BIOSYNTHETIC_PROCESS	GO:0044283 small molecule biosynthetic process, GOslim:biological_process	1859	183	0.1355	1
CARPEL_MORPHOGENESIS	GO:0048445 carpel morphogenesis, GOslim:biological_process	36	1	0.9593	1
GROWTH	GO:0040007 growth, GOslim:biological_process	938	89	0.3434	1
CELL_SURFACE_RECEPTOR_SIGNALING_PATHWAY	GO:0007166 cell surface receptor signaling pathway, GOslim:biological_process	161	10	0.9087	1
CELLULAR_BIOGENIC_AMINE_BIOSYNTHETIC_PROCESS	GO:0042401 cellular biogenic amine biosynthetic process, GOslim:biological_process	51	3	0.8358	1
FAT-SOLUBLE_VITAMIN_METABOLIC_PROCESS	GO:0006775 fat-soluble vitamin metabolic process, GOslim:biological_process	16	1	0.7703	1
MISMATCH_REPAIR	GO:0006298 mismatch repair, GOslim:biological_process	16	1	0.7703	1
VERY_LONG-CHAIN_FATTY_ACID_METABOLIC_PROCESS	GO:0000038 very long-chain fatty acid metabolic process, GOslim:biological_process	55	2	0.9557	1
STOMATAL_CLOSURE	GO:0090332 stomatal closure, GOslim:biological_process	6	2	0.1376	1
GLUCONEOGENESIS	GO:0006094 gluconeogenesis, GOslim:biological_process	169	12	0.8273	1
PROTEIN_ALKYLATION	GO:0008213 protein alkylation, GOslim:biological_process	302	30	0.337	1
MUCILAGE_METABOLIC_PROCESS	GO:0010191 mucilage metabolic process, GOslim:biological_process	11	2	0.2937	1
RNA-DIRECTED_DNA_METHYLATION	GO:0080188 RNA-directed DNA methylation, GOslim:biological_process	8	1	0.541	1
GTP_CATABOLIC_PROCESS	GO:0006184 GTP catabolic process, GOslim:biological_process	41	3	0.7179	1
GLUTAMINE_FAMILY_AMINO_ACID_METABOLIC_PROCESS	GO:0009064 glutamine family amino acid metabolic process, GOslim:biological_process	57	4	0.755	1
RESPONSE_TO_LOW_LIGHT_INTENSITY_STIMULUS	GO:0009645 response to low light intensity stimulus, GOslim:biological_process	6	1	0.4542	1
ENDOSPERM_DEVELOPMENT	GO:0009960 endosperm development, GOslim:biological_process	20	5	0.0512	1
RNA-DEPENDENT_DNA_REPLICATION	GO:0006278 RNA-dependent DNA replication, GOslim:biological_process	12	2	0.3253	1
SYNCYTIUM_FORMATION	GO:0006949 syncytium formation, GOslim:biological_process	22	1	0.8633	1
M_PHASE_OF_MITOTIC_CELL_CYCLE	GO:0000087 M phase of mitotic cell cycle, GOslim:biological_process	68	11	0.0608	1
NUCLEOSIDE_CATABOLIC_PROCESS	GO:0009164 nucleoside catabolic process, GOslim:biological_process	14	1	0.7269	1
TRANSITION_METAL_ION_TRANSPORT	GO:0000041 transition metal ion transport, GOslim:biological_process	243	26	0.2334	1
NON-PHOTOREACTIVE_DNA_REPAIR	GO:0010213 non-photoreactive DNA repair, GOslim:biological_process	2	1	0.2286	1
PURINE_RIBONUCLEOSIDE_TRIPHOSPHATE_CATABOLIC_PROCESS	GO:0009207 purine ribonucleoside triphosphate catabolic process, GOslim:biological_process	96	8	0.6388	1
REGULATION_OF_VIRAL_REPRODUCTION	GO:0050792 regulation of viral reproduction, GOslim:biological_process	2	1	0.2286	1
MAINTENANCE_OF_PROTEIN_LOCATION_IN_CELL	GO:0032507 maintenance of protein location in cell, GOslim:biological_process	12	2	0.3253	1
PORPHYRIN-CONTAINING_COMPOUND_BIOSYNTHETIC_PROCESS	GO:0006779 porphyrin-containing compound biosynthetic process, GOslim:biological_process	156	5	0.9979	1
REGULATION_OF_CELLULAR_LOCALIZATION	GO:0060341 regulation of cellular localization, GOslim:biological_process	7	1	0.4995	1
COENZYME_A_BIOSYNTHETIC_PROCESS	GO:0015937 coenzyme A biosynthetic process, GOslim:biological_process	9	2	0.2301	1
REGULATION_OF_RAFFINOSE_BIOSYNTHETIC_PROCESS	GO:1900091 regulation of raffinose biosynthetic process, GOslim:biological_process	1	1	0.1589	1
CELLULAR_MACROMOLECULAR_COMPLEX_SUBUNIT_ORGANIZATION	GO:0034621 cellular macromolecular complex subunit organization, GOslim:biological_process	615	49	0.8228	1
IRON_ION_TRANSPORT	GO:0006826 iron ion transport, GOslim:biological_process	126	13	0.3665	1
REGULATION_OF_PHOTOSYNTHESIS	GO:0010109 regulation of photosynthesis, GOslim:biological_process	25	2	0.6673	1
GLUCOSE_CATABOLIC_PROCESS	GO:0006007 glucose catabolic process, GOslim:biological_process	474	37	0.8274	1
RESPONSE_TO_LOW_FLUENCE_BLUE_LIGHT_STIMULUS_BY_BLUE_LOW-FLUENCE_SYSTEM	GO:0010244 response to low fluence blue light stimulus by blue low-fluence system, GOslim:biological_process	4	1	0.3511	1
CELLULAR_RESPIRATION	GO:0045333 cellular respiration, GOslim:biological_process	141	14	0.409	1
REGULATION_OF_TRANSLATIONAL_INITIATION	GO:0006446 regulation of translational initiation, GOslim:biological_process	15	3	0.1832	1
FERTILIZATION	GO:0009566 fertilization, GOslim:biological_process	33	2	0.7986	1
REGULATION_OF_TRANSFERASE_ACTIVITY	GO:0051338 regulation of transferase activity, GOslim:biological_process	93	10	0.3488	1
MEGAGAMETOGENESIS	GO:0009561 megagametogenesis, GOslim:biological_process	187	25	0.0468	1
ESTABLISHMENT_OF_RNA_LOCALIZATION	GO:0051236 establishment of RNA localization, GOslim:biological_process	68	12	0.0316	1
EMBRYONIC_SHOOT_MORPHOGENESIS	GO:0010064 embryonic shoot morphogenesis, GOslim:biological_process	1	1	0.1589	1
REGULATION_OF_STOMATAL_MOVEMENT	GO:0010119 regulation of stomatal movement, GOslim:biological_process	39	3	0.6876	1
NUCLEAR-TRANSCRIBED_MRNA_CATABOLIC_PROCESS,_NONSENSE-MEDIATED_DECAY	GO:0000184 nuclear-transcribed mRNA catabolic process, nonsense-mediated decay, GOslim:biological_process	5	2	0.109	1
SPECIFICATION_OF_ORGAN_NUMBER	GO:0048832 specification of organ number, GOslim:biological_process	4	1	0.3511	1
AUXIN_MEDIATED_SIGNALING_PATHWAY	GO:0009734 auxin mediated signaling pathway, GOslim:biological_process	63	8	0.2332	1
RESPONSE_TO_ABSENCE_OF_LIGHT	GO:0009646 response to absence of light, GOslim:biological_process	34	4	0.3875	1
REGULATION_OF_CELL_CYCLE_PROCESS	GO:0010564 regulation of cell cycle process, GOslim:biological_process	147	13	0.5713	1
SEED_MATURATION	GO:0010431 seed maturation, GOslim:biological_process	180	24	0.0518	1
REGULATION_OF_MERISTEM_DEVELOPMENT	GO:0048509 regulation of meristem development, GOslim:biological_process	215	25	0.14	1
POSITIVE_REGULATION_OF_SIGNAL_TRANSDUCTION	GO:0009967 positive regulation of signal transduction, GOslim:biological_process	27	3	0.458	1
LEUCINE_CATABOLIC_PROCESS	GO:0006552 leucine catabolic process, GOslim:biological_process	5	1	0.4049	1
NUCLEOTIDE_BIOSYNTHETIC_PROCESS	GO:0009165 nucleotide biosynthetic process, GOslim:biological_process	336	18	0.9926	1
DEFENSE_RESPONSE_SIGNALING_PATHWAY,_RESISTANCE_GENE-DEPENDENT	GO:0009870 defense response signaling pathway, resistance gene-dependent, GOslim:biological_process	15	4	0.0668	1
NEUTRAL_LIPID_METABOLIC_PROCESS	GO:0006638 neutral lipid metabolic process, GOslim:biological_process	21	3	0.32	1
DNA_PACKAGING	GO:0006323 DNA packaging, GOslim:biological_process	81	6	0.7371	1
NEGATIVE_REGULATION_OF_MULTICELLULAR_ORGANISMAL_PROCESS	GO:0051241 negative regulation of multicellular organismal process, GOslim:biological_process	15	3	0.1832	1
NITRILE_CATABOLIC_PROCESS	GO:0050899 nitrile catabolic process, GOslim:biological_process	2	1	0.2286	1
REGULATION_OF_ESTABLISHMENT_OF_PROTEIN_LOCALIZATION	GO:0070201 regulation of establishment of protein localization, GOslim:biological_process	3	1	0.2925	1
REGULATION_OF_TELOMERE_MAINTENANCE	GO:0032204 regulation of telomere maintenance, GOslim:biological_process	54	10	0.037	1
LATERAL_ROOT_DEVELOPMENT	GO:0048527 lateral root development, GOslim:biological_process	120	15	0.15	1
MACROMOLECULAR_COMPLEX_ASSEMBLY	GO:0065003 macromolecular complex assembly, GOslim:biological_process	665	62	0.4253	1
DNA_MEDIATED_TRANSFORMATION	GO:0009294 DNA mediated transformation, GOslim:biological_process	31	5	0.1742	1
REGULATION_OF_TRANSMEMBRANE_TRANSPORT	GO:0034762 regulation of transmembrane transport, GOslim:biological_process	32	2	0.7851	1
QUINONE_COFACTOR_BIOSYNTHETIC_PROCESS	GO:0045426 quinone cofactor biosynthetic process, GOslim:biological_process	40	6	0.1782	1
PLASTID_ORGANIZATION	GO:0009657 plastid organization, GOslim:biological_process	398	8	1	1
ACIDIC_AMINO_ACID_TRANSPORT	GO:0015800 acidic amino acid transport, GOslim:biological_process	5	1	0.4049	1
CELLULAR_RESPONSE_TO_XENOBIOTIC_STIMULUS	GO:0071466 cellular response to xenobiotic stimulus, GOslim:biological_process	9	1	0.579	1
HISTONE_H3-K9_DEMETHYLATION	GO:0033169 histone H3-K9 demethylation, GOslim:biological_process	3	2	0.058	1
CAROTENOID_BIOSYNTHETIC_PROCESS	GO:0016117 carotenoid biosynthetic process, GOslim:biological_process	105	3	0.995	1
GLUTATHIONE_BIOSYNTHETIC_PROCESS	GO:0006750 glutathione biosynthetic process, GOslim:biological_process	2	1	0.2286	1
CELLULAR_BIOSYNTHETIC_PROCESS	GO:0044249 cellular biosynthetic process, GOslim:biological_process	7714	721	0.1603	1
RNA_EXPORT_FROM_NUCLEUS	GO:0006405 RNA export from nucleus, GOslim:biological_process	68	12	0.0316	1
BRASSINOSTEROID_HOMEOSTASIS	GO:0010268 brassinosteroid homeostasis, GOslim:biological_process	6	2	0.1376	1
DOUBLE-STRAND_BREAK_REPAIR_VIA_NONHOMOLOGOUS_END_JOINING	GO:0006303 double-strand break repair via nonhomologous end joining, GOslim:biological_process	2	1	0.2286	1
DNA_INTEGRATION	GO:0015074 DNA integration, GOslim:biological_process	2	1	0.2286	1
REGULATION_OF_CELL_DIVISION	GO:0051302 regulation of cell division, GOslim:biological_process	55	6	0.394	1
PROSTHETIC_GROUP_METABOLIC_PROCESS	GO:0051189 prosthetic group metabolic process, GOslim:biological_process	11	1	0.6459	1
RESPONSE_TO_UV-C	GO:0010225 response to UV-C, GOslim:biological_process	6	2	0.1376	1
MOLYBDOPTERIN_COFACTOR_METABOLIC_PROCESS	GO:0043545 molybdopterin cofactor metabolic process, GOslim:biological_process	11	1	0.6459	1
NEGATIVE_REGULATION_OF_IMMUNE_SYSTEM_PROCESS	GO:0002683 negative regulation of immune system process, GOslim:biological_process	6	1	0.4542	1
GLYCEROL_ETHER_METABOLIC_PROCESS	GO:0006662 glycerol ether metabolic process, GOslim:biological_process	65	4	0.834	1
REGULATION_OF_ACTIN_POLYMERIZATION_OR_DEPOLYMERIZATION	GO:0008064 regulation of actin polymerization or depolymerization, GOslim:biological_process	18	4	0.1038	1
REGULATION_OF_SEEDLING_DEVELOPMENT	GO:1900140 regulation of seedling development, GOslim:biological_process	4	1	0.3511	1
PHLOEM_DEVELOPMENT	GO:0010088 phloem development, GOslim:biological_process	3	1	0.2925	1
REGULATION_OF_SHORT-DAY_PHOTOPERIODISM,_FLOWERING	GO:0048587 regulation of short-day photoperiodism, flowering, GOslim:biological_process	5	1	0.4049	1
MONOSACCHARIDE_BIOSYNTHETIC_PROCESS	GO:0046364 monosaccharide biosynthetic process, GOslim:biological_process	191	14	0.8105	1
REGULATION_OF_REACTIVE_OXYGEN_SPECIES_METABOLIC_PROCESS	GO:2000377 regulation of reactive oxygen species metabolic process, GOslim:biological_process	11	2	0.2937	1
APOCAROTENOID_BIOSYNTHETIC_PROCESS	GO:0043289 apocarotenoid biosynthetic process, GOslim:biological_process	36	5	0.2502	1
PURINE_RIBONUCLEOTIDE_TRANSPORT	GO:0015868 purine ribonucleotide transport, GOslim:biological_process	6	1	0.4542	1
CELL_JUNCTION_ASSEMBLY	GO:0034329 cell junction assembly, GOslim:biological_process	6	1	0.4542	1
CELLULAR_RESPONSE_TO_PHOSPHATE_STARVATION	GO:0016036 cellular response to phosphate starvation, GOslim:biological_process	139	16	0.2141	1
FUMARATE_METABOLIC_PROCESS	GO:0006106 fumarate metabolic process, GOslim:biological_process	2	1	0.2286	1
PROTEIN_PALMITOYLATION	GO:0018345 protein palmitoylation, GOslim:biological_process	3	1	0.2925	1
COUMARIN_BIOSYNTHETIC_PROCESS	GO:0009805 coumarin biosynthetic process, GOslim:biological_process	54	4	0.7188	1
PHAGOCYTOSIS	GO:0006909 phagocytosis, GOslim:biological_process	6	1	0.4542	1
HYPEROSMOTIC_RESPONSE	GO:0006972 hyperosmotic response, GOslim:biological_process	250	22	0.5796	1
REGULATION_OF_PROTEIN_SECRETION	GO:0050708 regulation of protein secretion, GOslim:biological_process	1	1	0.1589	1
CYTOKINESIS_AFTER_MEIOSIS	GO:0033206 cytokinesis after meiosis, GOslim:biological_process	2	1	0.2286	1
REGULATION_OF_SEED_MATURATION	GO:2000034 regulation of seed maturation, GOslim:biological_process	3	1	0.2925	1
PHOSPHOLIPID_CATABOLIC_PROCESS	GO:0009395 phospholipid catabolic process, GOslim:biological_process	6	1	0.4542	1
SEED_COAT_DEVELOPMENT	GO:0010214 seed coat development, GOslim:biological_process	18	3	0.2502	1
STARCH_METABOLIC_PROCESS	GO:0005982 starch metabolic process, GOslim:biological_process	230	14	0.9478	1
REGULATION_OF_TRANSCRIPTION_FROM_RNA_POLYMERASE_II_PROMOTER	GO:0006357 regulation of transcription from RNA polymerase II promoter, GOslim:biological_process	27	6	0.0514	1
POSITIVE_REGULATION_OF_CYTOSKELETON_ORGANIZATION	GO:0051495 positive regulation of cytoskeleton organization, GOslim:biological_process	7	1	0.4995	1
GLYCOSINOLATE_BIOSYNTHETIC_PROCESS	GO:0019758 glycosinolate biosynthetic process, GOslim:biological_process	172	19	0.2351	1
DICARBOXYLIC_ACID_CATABOLIC_PROCESS	GO:0043649 dicarboxylic acid catabolic process, GOslim:biological_process	1	1	0.1589	1
L-GLUTAMATE_TRANSPORT	GO:0015813 L-glutamate transport, GOslim:biological_process	3	1	0.2925	1
NUCLEOTIDE-SUGAR_BIOSYNTHETIC_PROCESS	GO:0009226 nucleotide-sugar biosynthetic process, GOslim:biological_process	14	1	0.7269	1
GUANOSINE_TETRAPHOSPHATE_METABOLIC_PROCESS	GO:0015969 guanosine tetraphosphate metabolic process, GOslim:biological_process	4	2	0.0823	1
SECONDARY_METABOLIC_PROCESS	GO:0019748 secondary metabolic process, GOslim:biological_process	1241	125	0.129	1
REGULATION_OF_KINASE_ACTIVITY	GO:0043549 regulation of kinase activity, GOslim:biological_process	89	9	0.425	1
RESPONSE_TO_ORGANIC_NITROGEN	GO:0010243 response to organic nitrogen, GOslim:biological_process	4	1	0.3511	1
D-AMINO_ACID_METABOLIC_PROCESS	GO:0046416 D-amino acid metabolic process, GOslim:biological_process	3	1	0.2925	1
LITHIUM_ION_TRANSPORT	GO:0010351 lithium ion transport, GOslim:biological_process	42	2	0.8895	1
PRENOL_BIOSYNTHETIC_PROCESS	GO:0016091 prenol biosynthetic process, GOslim:biological_process	18	1	0.8068	1
TRANSLATION	GO:0006412 translation, GOslim:biological_process	1342	35	1	1
UMP_BIOSYNTHETIC_PROCESS	GO:0006222 UMP biosynthetic process, GOslim:biological_process	5	1	0.4049	1
STEROID_METABOLIC_PROCESS	GO:0008202 steroid metabolic process, GOslim:biological_process	247	27	0.1991	1
SPHINGOID_METABOLIC_PROCESS	GO:0046519 sphingoid metabolic process, GOslim:biological_process	53	7	0.2269	1
VIRAL_INFECTIOUS_CYCLE	GO:0019058 viral infectious cycle, GOslim:biological_process	5	1	0.4049	1
CELLULAR_RESPONSE_TO_NITRATE	GO:0071249 cellular response to nitrate, GOslim:biological_process	3	1	0.2925	1
POSITIVE_REGULATION_OF_MITOTIC_CELL_CYCLE	GO:0045931 positive regulation of mitotic cell cycle, GOslim:biological_process	7	2	0.1676	1
POST-EMBRYONIC_ORGAN_MORPHOGENESIS	GO:0048563 post-embryonic organ morphogenesis, GOslim:biological_process	233	11	0.9927	1
PURINE_NUCLEOSIDE_METABOLIC_PROCESS	GO:0042278 purine nucleoside metabolic process, GOslim:biological_process	31	6	0.0817	1
DE-ETIOLATION	GO:0009704 de-etiolation, GOslim:biological_process	10	2	0.2619	1
STEM_CELL_DIFFERENTIATION	GO:0048863 stem cell differentiation, GOslim:biological_process	67	12	0.0289	1
HISTONE_H3-K4_DEMETHYLATION	GO:0034720 histone H3-K4 demethylation, GOslim:biological_process	1	1	0.1589	1
NCRNA_3'-END_PROCESSING	GO:0043628 ncRNA 3'-end processing, GOslim:biological_process	9	1	0.579	1
MRNA_TRANSPORT	GO:0051028 mRNA transport, GOslim:biological_process	61	11	0.0342	1
INDOLE_GLUCOSINOLATE_BIOSYNTHETIC_PROCESS	GO:0009759 indole glucosinolate biosynthetic process, GOslim:biological_process	6	1	0.4542	1
CELL_CYCLE_CYTOKINESIS	GO:0033205 cell cycle cytokinesis, GOslim:biological_process	208	25	0.1104	1
INOSITOL_TRISPHOSPHATE_METABOLIC_PROCESS	GO:0032957 inositol trisphosphate metabolic process, GOslim:biological_process	21	3	0.32	1
RESPONSE_TO_STEROID_HORMONE_STIMULUS	GO:0048545 response to steroid hormone stimulus, GOslim:biological_process	37	3	0.6551	1
DIACYLGLYCEROL_CATABOLIC_PROCESS	GO:0046340 diacylglycerol catabolic process, GOslim:biological_process	1	1	0.1589	1
CELL_FATE_SPECIFICATION	GO:0001708 cell fate specification, GOslim:biological_process	60	5	0.6344	1
PHOSPHOLIPID_METABOLIC_PROCESS	GO:0006644 phospholipid metabolic process, GOslim:biological_process	472	26	0.9969	1
HORMONE_BIOSYNTHETIC_PROCESS	GO:0042446 hormone biosynthetic process, GOslim:biological_process	277	29	0.2511	1
HEME_BIOSYNTHETIC_PROCESS	GO:0006783 heme biosynthetic process, GOslim:biological_process	27	1	0.9114	1
TRYPTOPHAN_METABOLIC_PROCESS	GO:0006568 tryptophan metabolic process, GOslim:biological_process	102	7	0.8084	1
CELLULAR_POLYSACCHARIDE_METABOLIC_PROCESS	GO:0044264 cellular polysaccharide metabolic process, GOslim:biological_process	596	64	0.1062	1
TETRAPYRROLE_BIOSYNTHETIC_PROCESS	GO:0033014 tetrapyrrole biosynthetic process, GOslim:biological_process	159	5	0.9982	1
UNSATURATED_FATTY_ACID_BIOSYNTHETIC_PROCESS	GO:0006636 unsaturated fatty acid biosynthetic process, GOslim:biological_process	70	1	0.9979	1
RECOGNITION_OF_POLLEN	GO:0048544 recognition of pollen, GOslim:biological_process	39	4	0.4822	1
REGULATION_OF_LIPID_CATABOLIC_PROCESS	GO:0050994 regulation of lipid catabolic process, GOslim:biological_process	6	1	0.4542	1
CYTOKINESIS_BY_CELL_PLATE_FORMATION	GO:0000911 cytokinesis by cell plate formation, GOslim:biological_process	204	24	0.1345	1
VIRAL_REPRODUCTIVE_PROCESS	GO:0022415 viral reproductive process, GOslim:biological_process	17	2	0.4749	1
ENTRAINMENT_OF_CIRCADIAN_CLOCK	GO:0009649 entrainment of circadian clock, GOslim:biological_process	8	1	0.541	1
LACTOSE_CATABOLIC_PROCESS,_USING_GLUCOSIDE_3-DEHYDROGENASE	GO:0019513 lactose catabolic process, using glucoside 3-dehydrogenase, GOslim:biological_process	12	2	0.3253	1
REGULATION_OF_CELLULAR_KETONE_METABOLIC_PROCESS	GO:0010565 regulation of cellular ketone metabolic process, GOslim:biological_process	38	7	0.0754	1
REGULATION_OF_CYTOSKELETON_ORGANIZATION	GO:0051493 regulation of cytoskeleton organization, GOslim:biological_process	29	6	0.0655	1
SEED_GROWTH	GO:0080112 seed growth, GOslim:biological_process	3	1	0.2925	1
PHOSPHOLIPID_TRANSFER_TO_MEMBRANE	GO:0006649 phospholipid transfer to membrane, GOslim:biological_process	1	1	0.1589	1
STARCH_CATABOLIC_PROCESS	GO:0005983 starch catabolic process, GOslim:biological_process	17	2	0.4749	1
SULFUR_AMINO_ACID_CATABOLIC_PROCESS	GO:0000098 sulfur amino acid catabolic process, GOslim:biological_process	3	2	0.058	1
ANAEROBIC_RESPIRATION	GO:0009061 anaerobic respiration, GOslim:biological_process	20	4	0.1327	1
UNSATURATED_FATTY_ACID_METABOLIC_PROCESS	GO:0033559 unsaturated fatty acid metabolic process, GOslim:biological_process	71	1	0.998	1
RESPONSE_TO_AMINE_STIMULUS	GO:0014075 response to amine stimulus, GOslim:biological_process	3	1	0.2925	1
RESPONSE_TO_UV-B	GO:0010224 response to UV-B, GOslim:biological_process	104	10	0.4739	1
QUINONE_COFACTOR_METABOLIC_PROCESS	GO:0042375 quinone cofactor metabolic process, GOslim:biological_process	40	6	0.1782	1
NEGATIVE_REGULATION_OF_SYSTEMIC_ACQUIRED_RESISTANCE	GO:0010113 negative regulation of systemic acquired resistance, GOslim:biological_process	2	1	0.2286	1
TELOMERE_MAINTENANCE_IN_RESPONSE_TO_DNA_DAMAGE	GO:0043247 telomere maintenance in response to DNA damage, GOslim:biological_process	52	9	0.063	1
PRIMARY_MERISTEM_TISSUE_DEVELOPMENT	GO:0010065 primary meristem tissue development, GOslim:biological_process	10	1	0.6139	1
PURINE_NUCLEOSIDE_TRIPHOSPHATE_BIOSYNTHETIC_PROCESS	GO:0009145 purine nucleoside triphosphate biosynthetic process, GOslim:biological_process	78	4	0.9165	1
TETRAHYDROFOLYLPOLYGLUTAMATE_METABOLIC_PROCESS	GO:0046900 tetrahydrofolylpolyglutamate metabolic process, GOslim:biological_process	3	1	0.2925	1
PIGMENT_BIOSYNTHETIC_PROCESS	GO:0046148 pigment biosynthetic process, GOslim:biological_process	281	10	0.9998	1
POLYSACCHARIDE_CATABOLIC_PROCESS	GO:0000272 polysaccharide catabolic process, GOslim:biological_process	54	5	0.5469	1
PARA-AMINOBENZOIC_ACID_METABOLIC_PROCESS	GO:0046482 para-aminobenzoic acid metabolic process, GOslim:biological_process	38	7	0.0754	1
POSITIVE_REGULATION_OF_MOLECULAR_FUNCTION	GO:0044093 positive regulation of molecular function, GOslim:biological_process	130	7	0.9429	1
CELLULAR_RESPONSE_TO_OXIDATIVE_STRESS	GO:0034599 cellular response to oxidative stress, GOslim:biological_process	98	12	0.1997	1
ACETATE_METABOLIC_PROCESS	GO:0006083 acetate metabolic process, GOslim:biological_process	18	2	0.5024	1
REGULATION_OF_ACTIN_FILAMENT_POLYMERIZATION	GO:0030833 regulation of actin filament polymerization, GOslim:biological_process	16	4	0.0783	1
CELLULAR_ION_HOMEOSTASIS	GO:0006873 cellular ion homeostasis, GOslim:biological_process	181	11	0.9289	1
ROOT_HAIR_ELONGATION	GO:0048767 root hair elongation, GOslim:biological_process	187	13	0.8541	1
REGULATION_OF_FATTY_ACID_METABOLIC_PROCESS	GO:0019217 regulation of fatty acid metabolic process, GOslim:biological_process	10	1	0.6139	1
DORMANCY_PROCESS	GO:0022611 dormancy process, GOslim:biological_process	158	19	0.1476	1
REGULATION_OF_MERISTEM_GROWTH	GO:0010075 regulation of meristem growth, GOslim:biological_process	166	16	0.4406	1
PROTEIN_MATURATION	GO:0051604 protein maturation, GOslim:biological_process	79	13	0.0399	1
HISTONE_MONOUBIQUITINATION	GO:0010390 histone monoubiquitination, GOslim:biological_process	2	2	0.0368	1
ANTHER_MORPHOGENESIS	GO:0048654 anther morphogenesis, GOslim:biological_process	5	1	0.4049	1
REGULATION_OF_ACTIN_FILAMENT_LENGTH	GO:0030832 regulation of actin filament length, GOslim:biological_process	18	4	0.1038	1
HYPEROSMOTIC_SALINITY_RESPONSE	GO:0042538 hyperosmotic salinity response, GOslim:biological_process	161	14	0.5947	1
CELLULAR_RESPONSE_TO_CYTOKININ_STIMULUS	GO:0071368 cellular response to cytokinin stimulus, GOslim:biological_process	79	8	0.4338	1
PROTEIN_TARGETING_TO_MITOCHONDRION	GO:0006626 protein targeting to mitochondrion, GOslim:biological_process	106	7	0.8364	1
ASPARTATE_FAMILY_AMINO_ACID_CATABOLIC_PROCESS	GO:0009068 aspartate family amino acid catabolic process, GOslim:biological_process	20	3	0.2966	1
MITOCHONDRIAL_ELECTRON_TRANSPORT,_UBIQUINOL_TO_CYTOCHROME_C	GO:0006122 mitochondrial electron transport, ubiquinol to cytochrome c, GOslim:biological_process	5	1	0.4049	1
MONOSACCHARIDE_METABOLIC_PROCESS	GO:0005996 monosaccharide metabolic process, GOslim:biological_process	804	63	0.8799	1
POLY(A)+_MRNA_EXPORT_FROM_NUCLEUS	GO:0016973 poly(A)+ mRNA export from nucleus, GOslim:biological_process	5	1	0.4049	1
PROTEASOMAL_PROTEIN_CATABOLIC_PROCESS	GO:0010498 proteasomal protein catabolic process, GOslim:biological_process	211	25	0.1225	1
XENOBIOTIC_METABOLIC_PROCESS	GO:0006805 xenobiotic metabolic process, GOslim:biological_process	9	1	0.579	1
OLIGOSACCHARIDE_METABOLIC_PROCESS	GO:0009311 oligosaccharide metabolic process, GOslim:biological_process	244	14	0.9694	1
RAB_PROTEIN_SIGNAL_TRANSDUCTION	GO:0032482 Rab protein signal transduction, GOslim:biological_process	23	1	0.8747	1
SUCROSE_TRANSPORT	GO:0015770 sucrose transport, GOslim:biological_process	14	1	0.7269	1
CELL_PLATE_FORMATION_INVOLVED_IN_PLANT-TYPE_CELL_WALL_BIOGENESIS	GO:0009920 cell plate formation involved in plant-type cell wall biogenesis, GOslim:biological_process	6	3	0.0327	1
TAPETAL_LAYER_FORMATION	GO:0048656 tapetal layer formation, GOslim:biological_process	3	1	0.2925	1
GLYCOSIDE_METABOLIC_PROCESS	GO:0016137 glycoside metabolic process, GOslim:biological_process	268	23	0.6251	1
POLYAMINE_BIOSYNTHETIC_PROCESS	GO:0006596 polyamine biosynthetic process, GOslim:biological_process	19	1	0.8228	1
AROMATIC_AMINO_ACID_FAMILY_BIOSYNTHETIC_PROCESS,_PREPHENATE_PATHWAY	GO:0009095 aromatic amino acid family biosynthetic process, prephenate pathway, GOslim:biological_process	11	2	0.2937	1
DICARBOXYLIC_ACID_METABOLIC_PROCESS	GO:0043648 dicarboxylic acid metabolic process, GOslim:biological_process	143	8	0.9391	1
REGULATION_OF_CELL_DEVELOPMENT	GO:0060284 regulation of cell development, GOslim:biological_process	16	1	0.7703	1
ORGANIC_CATION_TRANSPORT	GO:0015695 organic cation transport, GOslim:biological_process	30	4	0.31	1
REGULATION_OF_GENE_SILENCING_BY_RNA	GO:0060966 regulation of gene silencing by RNA, GOslim:biological_process	2	1	0.2286	1
FAT-SOLUBLE_VITAMIN_BIOSYNTHETIC_PROCESS	GO:0042362 fat-soluble vitamin biosynthetic process, GOslim:biological_process	16	1	0.7703	1
MEMBRANE_INVAGINATION	GO:0010324 membrane invagination, GOslim:biological_process	36	6	0.1309	1
LONG-CHAIN_FATTY_ACID_METABOLIC_PROCESS	GO:0001676 long-chain fatty acid metabolic process, GOslim:biological_process	26	3	0.4357	1
RESPONSE_TO_SUCROSE_STIMULUS	GO:0009744 response to sucrose stimulus, GOslim:biological_process	209	14	0.8914	1
RED_OR_FAR-RED_LIGHT_SIGNALING_PATHWAY	GO:0010017 red or far-red light signaling pathway, GOslim:biological_process	45	5	0.4003	1
POTASSIUM_ION_IMPORT	GO:0010107 potassium ion import, GOslim:biological_process	5	2	0.109	1
CHLOROPLAST_ACCUMULATION_MOVEMENT	GO:0009904 chloroplast accumulation movement, GOslim:biological_process	6	1	0.4542	1
NEGATIVE_REGULATION_OF_SULFUR_AMINO_ACID_METABOLIC_PROCESS	GO:0031336 negative regulation of sulfur amino acid metabolic process, GOslim:biological_process	2	1	0.2286	1
REGULATION_OF_SEED_GROWTH	GO:0080113 regulation of seed growth, GOslim:biological_process	3	1	0.2925	1
MEMBRANE_LIPID_METABOLIC_PROCESS	GO:0006643 membrane lipid metabolic process, GOslim:biological_process	178	20	0.2081	1
NEGATIVE_REGULATION_OF_CELLULAR_CATABOLIC_PROCESS	GO:0031330 negative regulation of cellular catabolic process, GOslim:biological_process	3	1	0.2925	1
TERPENE_METABOLIC_PROCESS	GO:0042214 terpene metabolic process, GOslim:biological_process	66	7	0.4019	1
ROOT_EPIDERMAL_CELL_DIFFERENTIATION	GO:0010053 root epidermal cell differentiation, GOslim:biological_process	349	35	0.3023	1
CHROMATIN_SILENCING_BY_SMALL_RNA	GO:0031048 chromatin silencing by small RNA, GOslim:biological_process	117	18	0.0302	1
PROTEASOME_ASSEMBLY	GO:0043248 proteasome assembly, GOslim:biological_process	182	22	0.1228	1
POLYAMINE_METABOLIC_PROCESS	GO:0006595 polyamine metabolic process, GOslim:biological_process	60	3	0.903	1
SELENATE_TRANSPORT	GO:0080160 selenate transport, GOslim:biological_process	2	1	0.2286	1
ORGANIC_ANION_TRANSPORT	GO:0015711 organic anion transport, GOslim:biological_process	17	1	0.7893	1
GIBBERELLIN_METABOLIC_PROCESS	GO:0009685 gibberellin metabolic process, GOslim:biological_process	61	3	0.9086	1
AMINE_METABOLIC_PROCESS	GO:0009308 amine metabolic process, GOslim:biological_process	1030	92	0.5593	1
INDUCTION_OF_PROGRAMMED_CELL_DEATH	GO:0012502 induction of programmed cell death, GOslim:biological_process	1	1	0.1589	1
NICKEL_CATION_TRANSPORT	GO:0015675 nickel cation transport, GOslim:biological_process	4	1	0.3511	1
REGULATION_OF_LIPID_METABOLIC_PROCESS	GO:0019216 regulation of lipid metabolic process, GOslim:biological_process	44	3	0.7589	1
CELL_WALL_THICKENING	GO:0052386 cell wall thickening, GOslim:biological_process	48	5	0.4506	1
INDOLALKYLAMINE_METABOLIC_PROCESS	GO:0006586 indolalkylamine metabolic process, GOslim:biological_process	102	7	0.8084	1
CARBOHYDRATE_PHOSPHORYLATION	GO:0046835 carbohydrate phosphorylation, GOslim:biological_process	5	1	0.4049	1
MAINTENANCE_OF_CHROMATIN_SILENCING	GO:0006344 maintenance of chromatin silencing, GOslim:biological_process	2	1	0.2286	1
FOLIC_ACID-CONTAINING_COMPOUND_METABOLIC_PROCESS	GO:0006760 folic acid-containing compound metabolic process, GOslim:biological_process	65	8	0.2568	1
NUCLEOBASE-CONTAINING_COMPOUND_TRANSPORT	GO:0015931 nucleobase-containing compound transport, GOslim:biological_process	238	21	0.5746	1
MACROAUTOPHAGY	GO:0016236 macroautophagy, GOslim:biological_process	4	1	0.3511	1
AMIDE_BIOSYNTHETIC_PROCESS	GO:0043604 amide biosynthetic process, GOslim:biological_process	5	2	0.109	1
POLYPRENOL_BIOSYNTHETIC_PROCESS	GO:0016094 polyprenol biosynthetic process, GOslim:biological_process	18	1	0.8068	1
RESPONSE_TO_TREHALOSE_STIMULUS	GO:0010353 response to trehalose stimulus, GOslim:biological_process	3	1	0.2925	1
SPECIFICATION_OF_SYMMETRY	GO:0009799 specification of symmetry, GOslim:biological_process	123	17	0.0718	1
ALLANTOIN_TRANSPORT	GO:0015720 allantoin transport, GOslim:biological_process	2	1	0.2286	1
SUPEROXIDE_ANION_GENERATION	GO:0042554 superoxide anion generation, GOslim:biological_process	2	1	0.2286	1
CELLULAR_NITROGEN_COMPOUND_BIOSYNTHETIC_PROCESS	GO:0044271 cellular nitrogen compound biosynthetic process, GOslim:biological_process	800	58	0.9593	1
INDOLEBUTYRIC_ACID_METABOLIC_PROCESS	GO:0080024 indolebutyric acid metabolic process, GOslim:biological_process	5	1	0.4049	1
POSITIVE_REGULATION_OF_TRANSLATION	GO:0045727 positive regulation of translation, GOslim:biological_process	21	4	0.1482	1
SULFUR_COMPOUND_CATABOLIC_PROCESS	GO:0044273 sulfur compound catabolic process, GOslim:biological_process	21	3	0.32	1
BRASSINOSTEROID_METABOLIC_PROCESS	GO:0016131 brassinosteroid metabolic process, GOslim:biological_process	122	12	0.4337	1
REGULATION_OF_CELLULAR_AMINE_METABOLIC_PROCESS	GO:0033238 regulation of cellular amine metabolic process, GOslim:biological_process	9	3	0.071	1
NUCLEOBASE-CONTAINING_SMALL_MOLECULE_CATABOLIC_PROCESS	GO:0034656 nucleobase-containing small molecule catabolic process, GOslim:biological_process	18	2	0.5024	1
RRNA_METABOLIC_PROCESS	GO:0016072 rRNA metabolic process, GOslim:biological_process	324	7	1	1
COLD_ACCLIMATION	GO:0009631 cold acclimation, GOslim:biological_process	30	2	0.7559	1
EFFECTOR_DEPENDENT_INDUCTION_BY_SYMBIONT_OF_HOST_IMMUNE_RESPONSE	GO:0080185 effector dependent induction by symbiont of host immune response, GOslim:biological_process	2	1	0.2286	1
ALDITOL_METABOLIC_PROCESS	GO:0019400 alditol metabolic process, GOslim:biological_process	38	4	0.4637	1
CYTOPLASMIC_MICROTUBULE_ORGANIZATION	GO:0031122 cytoplasmic microtubule organization, GOslim:biological_process	21	4	0.1482	1
REGULATION_OF_CELLULAR_COMPONENT_SIZE	GO:0032535 regulation of cellular component size, GOslim:biological_process	746	65	0.6309	1
CELLULAR_NITROGEN_COMPOUND_METABOLIC_PROCESS	GO:0034641 cellular nitrogen compound metabolic process, GOslim:biological_process	1369	124	0.5037	1
MACROMOLECULAR_COMPLEX_DISASSEMBLY	GO:0032984 macromolecular complex disassembly, GOslim:biological_process	36	3	0.6379	1
POLLEN_MATURATION	GO:0010152 pollen maturation, GOslim:biological_process	12	1	0.6753	1
REGULATION_OF_RESPONSE_TO_DNA_DAMAGE_STIMULUS	GO:2001020 regulation of response to DNA damage stimulus, GOslim:biological_process	3	2	0.058	1
JASMONIC_ACID_METABOLIC_PROCESS	GO:0009694 jasmonic acid metabolic process, GOslim:biological_process	159	8	0.971	1
GLYCEROL_ETHER_BIOSYNTHETIC_PROCESS	GO:0046504 glycerol ether biosynthetic process, GOslim:biological_process	16	2	0.4465	1
DI-,_TRI-VALENT_INORGANIC_ANION_HOMEOSTASIS	GO:0055061 di-, tri-valent inorganic anion homeostasis, GOslim:biological_process	15	3	0.1832	1
POSITIVE_REGULATION_OF_CATALYTIC_ACTIVITY	GO:0043085 positive regulation of catalytic activity, GOslim:biological_process	129	7	0.9402	1
POSITIVE_REGULATION_OF_GENE_EXPRESSION,_EPIGENETIC	GO:0045815 positive regulation of gene expression, epigenetic, GOslim:biological_process	1	1	0.1589	1
AROMATIC_AMINO_ACID_FAMILY_BIOSYNTHETIC_PROCESS	GO:0009073 aromatic amino acid family biosynthetic process, GOslim:biological_process	100	5	0.9421	1
RESPONSE_TO_VITAMIN_B1	GO:0010266 response to vitamin B1, GOslim:biological_process	2	1	0.2286	1
COTYLEDON_DEVELOPMENT	GO:0048825 cotyledon development, GOslim:biological_process	77	12	0.0633	1
PURINE_NUCLEOBASE_CATABOLIC_PROCESS	GO:0006145 purine nucleobase catabolic process, GOslim:biological_process	1	1	0.1589	1
PROTEIN_RETENTION_IN_GOLGI_APPARATUS	GO:0045053 protein retention in Golgi apparatus, GOslim:biological_process	1	1	0.1589	1
NUCLEOSIDE_PHOSPHATE_METABOLIC_PROCESS	GO:0006753 nucleoside phosphate metabolic process, GOslim:biological_process	687	41	0.9977	1
ACTIN_FILAMENT_BUNDLE_ASSEMBLY	GO:0051017 actin filament bundle assembly, GOslim:biological_process	13	1	0.7022	1
CARBON_UTILIZATION	GO:0015976 carbon utilization, GOslim:biological_process	8	2	0.1985	1
CARBOHYDRATE_BIOSYNTHETIC_PROCESS	GO:0016051 carbohydrate biosynthetic process, GOslim:biological_process	1069	95	0.5788	1
STEROL_METABOLIC_PROCESS	GO:0016125 sterol metabolic process, GOslim:biological_process	172	18	0.3115	1
DITERPENOID_BIOSYNTHETIC_PROCESS	GO:0016102 diterpenoid biosynthetic process, GOslim:biological_process	55	2	0.9557	1
ABSCISSION	GO:0009838 abscission, GOslim:biological_process	50	5	0.4834	1
HYPOTONIC_RESPONSE	GO:0006971 hypotonic response, GOslim:biological_process	2	1	0.2286	1
WATER_TRANSPORT	GO:0006833 water transport, GOslim:biological_process	155	9	0.9333	1
ISOPENTENYL_DIPHOSPHATE_METABOLIC_PROCESS	GO:0046490 isopentenyl diphosphate metabolic process, GOslim:biological_process	233	3	1	1
NON-RECOMBINATIONAL_REPAIR	GO:0000726 non-recombinational repair, GOslim:biological_process	2	1	0.2286	1
PIGMENT_ACCUMULATION_IN_TISSUES	GO:0043480 pigment accumulation in tissues, GOslim:biological_process	113	8	0.7944	1
PROTEIN_ARGINYLATION	GO:0016598 protein arginylation, GOslim:biological_process	2	1	0.2286	1
CELLULAR_RESPONSE_TO_LIGHT_STIMULUS	GO:0071482 cellular response to light stimulus, GOslim:biological_process	77	8	0.408	1
RESPONSE_TO_NUTRIENT_LEVELS	GO:0031667 response to nutrient levels, GOslim:biological_process	331	41	0.0377	1
SESQUITERPENE_METABOLIC_PROCESS	GO:0051761 sesquiterpene metabolic process, GOslim:biological_process	50	7	0.1906	1
GLYCEROL_METABOLIC_PROCESS	GO:0006071 glycerol metabolic process, GOslim:biological_process	37	4	0.4449	1
PHYTOALEXIN_METABOLIC_PROCESS	GO:0052314 phytoalexin metabolic process, GOslim:biological_process	12	2	0.3253	1
PURINE_NUCLEOTIDE_METABOLIC_PROCESS	GO:0006163 purine nucleotide metabolic process, GOslim:biological_process	217	11	0.9845	1
L-ARGININE_IMPORT	GO:0043091 L-arginine import, GOslim:biological_process	3	1	0.2925	1
OLIGOSACCHARIDE_TRANSPORT	GO:0015772 oligosaccharide transport, GOslim:biological_process	15	1	0.7495	1
ORGANELLE_ASSEMBLY	GO:0070925 organelle assembly, GOslim:biological_process	57	3	0.884	1
REGULATION_OF_ACTIN_FILAMENT-BASED_PROCESS	GO:0032970 regulation of actin filament-based process, GOslim:biological_process	22	5	0.0679	1
CELLULAR_RESPONSE_TO_LIGHT_INTENSITY	GO:0071484 cellular response to light intensity, GOslim:biological_process	9	2	0.2301	1
FLOWER_DEVELOPMENT	GO:0009908 flower development, GOslim:biological_process	937	87	0.4193	1
CYTOKINETIC_PROCESS	GO:0032506 cytokinetic process, GOslim:biological_process	26	6	0.0451	1
UBIQUINONE_METABOLIC_PROCESS	GO:0006743 ubiquinone metabolic process, GOslim:biological_process	29	5	0.1467	1
NICOTINAMIDE_NUCLEOTIDE_METABOLIC_PROCESS	GO:0046496 nicotinamide nucleotide metabolic process, GOslim:biological_process	212	13	0.9385	1
DETECTION_OF_CHEMICAL_STIMULUS	GO:0009593 detection of chemical stimulus, GOslim:biological_process	18	5	0.0372	1
OXIDATIVE_PHOSPHORYLATION	GO:0006119 oxidative phosphorylation, GOslim:biological_process	72	2	0.9873	1
VASCULATURE_DEVELOPMENT	GO:0001944 vasculature development, GOslim:biological_process	5	1	0.4049	1
NEGATIVE_REGULATION_OF_MAP_KINASE_ACTIVITY	GO:0043407 negative regulation of MAP kinase activity, GOslim:biological_process	15	2	0.4173	1
INTERCELLULAR_TRANSPORT	GO:0010496 intercellular transport, GOslim:biological_process	11	2	0.2937	1
KARYOGAMY	GO:0000741 karyogamy, GOslim:biological_process	54	6	0.3788	1
LYSOSOMAL_TRANSPORT	GO:0007041 lysosomal transport, GOslim:biological_process	4	1	0.3511	1
CELL_MORPHOGENESIS	GO:0000902 cell morphogenesis, GOslim:biological_process	687	65	0.3789	1
DNA_REPLICATION	GO:0006260 DNA replication, GOslim:biological_process	337	17	0.9961	1
ER-ASSOCIATED_PROTEIN_CATABOLIC_PROCESS	GO:0030433 ER-associated protein catabolic process, GOslim:biological_process	6	1	0.4542	1
METHIONINE_METABOLIC_PROCESS	GO:0006555 methionine metabolic process, GOslim:biological_process	236	30	0.0526	1
INDUCTIVE_CELL-CELL_SIGNALING	GO:0031129 inductive cell-cell signaling, GOslim:biological_process	1	1	0.1589	1
REGULATION_OF_ION_TRANSPORT	GO:0043269 regulation of ion transport, GOslim:biological_process	147	10	0.8468	1
PLASMODESMATA-MEDIATED_INTERCELLULAR_TRANSPORT	GO:0010497 plasmodesmata-mediated intercellular transport, GOslim:biological_process	9	2	0.2301	1
PROTEIN_COMPLEX_DISASSEMBLY	GO:0043241 protein complex disassembly, GOslim:biological_process	36	3	0.6379	1
DETECTION_OF_CALCIUM_ION	GO:0005513 detection of calcium ion, GOslim:biological_process	7	2	0.1676	1
POSITIVE_REGULATION_OF_NUCLEASE_ACTIVITY	GO:0032075 positive regulation of nuclease activity, GOslim:biological_process	1	1	0.1589	1
RESPONSE_TO_PHENYLPROPANOID	GO:0080184 response to phenylpropanoid, GOslim:biological_process	1	1	0.1589	1
REGULATION_OF_GENE_EXPRESSION_BY_GENETIC_IMPRINTING	GO:0006349 regulation of gene expression by genetic imprinting, GOslim:biological_process	13	2	0.3565	1
CELLULAR_RESPONSE_TO_RADIATION	GO:0071478 cellular response to radiation, GOslim:biological_process	77	8	0.408	1
MAINTENANCE_OF_SHOOT_APICAL_MERISTEM_IDENTITY	GO:0010492 maintenance of shoot apical meristem identity, GOslim:biological_process	13	2	0.3565	1
ROOT_MERISTEM_GROWTH	GO:0010449 root meristem growth, GOslim:biological_process	16	3	0.205	1
GLYCEROLIPID_METABOLIC_PROCESS	GO:0046486 glycerolipid metabolic process, GOslim:biological_process	262	20	0.797	1
PROTEIN_HOMOTRIMERIZATION	GO:0070207 protein homotrimerization, GOslim:biological_process	1	1	0.1589	1
MEIOSIS_I	GO:0007127 meiosis I, GOslim:biological_process	153	13	0.6254	1
PHOSPHOLIPID_DEPHOSPHORYLATION	GO:0046839 phospholipid dephosphorylation, GOslim:biological_process	2	1	0.2286	1
CELLULAR_RESPONSE_TO_NUTRIENT_LEVELS	GO:0031669 cellular response to nutrient levels, GOslim:biological_process	314	38	0.0567	1
L-METHIONINE_BIOSYNTHETIC_PROCESS	GO:0071265 L-methionine biosynthetic process, GOslim:biological_process	7	1	0.4995	1
TREHALOSE_BIOSYNTHETIC_PROCESS	GO:0005992 trehalose biosynthetic process, GOslim:biological_process	25	2	0.6673	1
RNA_STABILIZATION	GO:0043489 RNA stabilization, GOslim:biological_process	6	1	0.4542	1
WAX_METABOLIC_PROCESS	GO:0010166 wax metabolic process, GOslim:biological_process	19	3	0.2733	1
INDOLALKYLAMINE_BIOSYNTHETIC_PROCESS	GO:0046219 indolalkylamine biosynthetic process, GOslim:biological_process	26	2	0.6869	1
PROTEIN_RETENTION_IN_ER_LUMEN	GO:0006621 protein retention in ER lumen, GOslim:biological_process	7	1	0.4995	1
SPLICEOSOMAL_COMPLEX_ASSEMBLY	GO:0000245 spliceosomal complex assembly, GOslim:biological_process	7	2	0.1676	1
MOLYBDATE_ION_EXPORT_FROM_VACUOLE	GO:0090414 molybdate ion export from vacuole, GOslim:biological_process	1	1	0.1589	1
ENERGY_DERIVATION_BY_OXIDATION_OF_ORGANIC_COMPOUNDS	GO:0015980 energy derivation by oxidation of organic compounds, GOslim:biological_process	170	16	0.4761	1
ALDITOL_CATABOLIC_PROCESS	GO:0019405 alditol catabolic process, GOslim:biological_process	9	1	0.579	1
NUCLEOBASE-CONTAINING_COMPOUND_CATABOLIC_PROCESS	GO:0034655 nucleobase-containing compound catabolic process, GOslim:biological_process	18	2	0.5024	1
CERAMIDE_METABOLIC_PROCESS	GO:0006672 ceramide metabolic process, GOslim:biological_process	20	2	0.5546	1
REGULATION_OF_ATPASE_ACTIVITY	GO:0043462 regulation of ATPase activity, GOslim:biological_process	1	1	0.1589	1
MICROGAMETOGENESIS	GO:0055046 microgametogenesis, GOslim:biological_process	42	2	0.8895	1
DORSAL/VENTRAL_PATTERN_FORMATION	GO:0009953 dorsal/ventral pattern formation, GOslim:biological_process	1	1	0.1589	1
FLORAL_ORGAN_MORPHOGENESIS	GO:0048444 floral organ morphogenesis, GOslim:biological_process	233	11	0.9927	1
POSITIVE_REGULATION_OF_HYDROXYMETHYLGLUTARYL-COA_REDUCTASE_(NADPH)_ACTIVITY	GO:1900490 positive regulation of hydroxymethylglutaryl-CoA reductase (NADPH) activity, GOslim:biological_process	1	1	0.1589	1
PROTEIN_PRENYLATION	GO:0018342 protein prenylation, GOslim:biological_process	7	3	0.0438	1
(1->3)-BETA-D-GLUCAN_BIOSYNTHETIC_PROCESS	GO:0006075 (1->3)-beta-D-glucan biosynthetic process, GOslim:biological_process	13	2	0.3565	1
NEGATIVE_REGULATION_OF_IMMUNE_RESPONSE	GO:0050777 negative regulation of immune response, GOslim:biological_process	5	1	0.4049	1
STOMATAL_LINEAGE_PROGRESSION	GO:0010440 stomatal lineage progression, GOslim:biological_process	58	4	0.7663	1
TRNA_AMINOACYLATION_FOR_PROTEIN_TRANSLATION	GO:0006418 tRNA aminoacylation for protein translation, GOslim:biological_process	66	3	0.9327	1
RETROGRADE_TRANSPORT,_ENDOSOME_TO_GOLGI	GO:0042147 retrograde transport, endosome to Golgi, GOslim:biological_process	7	3	0.0438	1
POLYSACCHARIDE_BIOSYNTHETIC_PROCESS	GO:0000271 polysaccharide biosynthetic process, GOslim:biological_process	587	61	0.1634	1
GLYCOLYSIS	GO:0006096 glycolysis, GOslim:biological_process	219	19	0.6019	1
INDOLE_PHYTOALEXIN_BIOSYNTHETIC_PROCESS	GO:0009700 indole phytoalexin biosynthetic process, GOslim:biological_process	12	2	0.3253	1
REGULATION_OF_SALICYLIC_ACID_MEDIATED_SIGNALING_PATHWAY	GO:2000031 regulation of salicylic acid mediated signaling pathway, GOslim:biological_process	5	2	0.109	1
AUTOPHAGIC_VACUOLE_ASSEMBLY	GO:0000045 autophagic vacuole assembly, GOslim:biological_process	3	1	0.2925	1
REGULATION_OF_ANATOMICAL_STRUCTURE_SIZE	GO:0090066 regulation of anatomical structure size, GOslim:biological_process	746	65	0.6309	1
NUCLEOTIDE_METABOLIC_PROCESS	GO:0009117 nucleotide metabolic process, GOslim:biological_process	685	41	0.9975	1
INOSITOL_CATABOLIC_PROCESS	GO:0019310 inositol catabolic process, GOslim:biological_process	4	1	0.3511	1
PHENYLPROPANOID_BIOSYNTHETIC_PROCESS	GO:0009699 phenylpropanoid biosynthetic process, GOslim:biological_process	326	29	0.5604	1
RESPONSE_TO_ZINC_ION	GO:0010043 response to zinc ion, GOslim:biological_process	60	5	0.6344	1
PRIMARY_ALCOHOL_METABOLIC_PROCESS	GO:0034308 primary alcohol metabolic process, GOslim:biological_process	6	1	0.4542	1
DETECTION_OF_LIGHT_STIMULUS	GO:0009583 detection of light stimulus, GOslim:biological_process	19	2	0.529	1
COENZYME_CATABOLIC_PROCESS	GO:0009109 coenzyme catabolic process, GOslim:biological_process	30	4	0.31	1
CIRCUMNUTATION	GO:0010031 circumnutation, GOslim:biological_process	5	1	0.4049	1
NEGATIVE_REGULATION_OF_CYCLIN-DEPENDENT_PROTEIN_KINASE_ACTIVITY	GO:0045736 negative regulation of cyclin-dependent protein kinase activity, GOslim:biological_process	27	3	0.458	1
ORNITHINE_CATABOLIC_PROCESS	GO:0006593 ornithine catabolic process, GOslim:biological_process	1	1	0.1589	1
TRNA_SPLICING,_VIA_ENDONUCLEOLYTIC_CLEAVAGE_AND_LIGATION	GO:0006388 tRNA splicing, via endonucleolytic cleavage and ligation, GOslim:biological_process	7	1	0.4995	1
DEHISCENCE	GO:0009900 dehiscence, GOslim:biological_process	20	1	0.8375	1
HISTONE_H2B_UBIQUITINATION	GO:0033523 histone H2B ubiquitination, GOslim:biological_process	4	2	0.0823	1
ABSCISIC_ACID_TRANSPORT	GO:0080168 abscisic acid transport, GOslim:biological_process	3	1	0.2925	1
CELLULAR_AMIDE_METABOLIC_PROCESS	GO:0043603 cellular amide metabolic process, GOslim:biological_process	222	17	0.7782	1
MICROTUBULE-BASED_PROCESS	GO:0007017 microtubule-based process, GOslim:biological_process	313	35	0.1351	1
CHROMATIN_ASSEMBLY_OR_DISASSEMBLY	GO:0006333 chromatin assembly or disassembly, GOslim:biological_process	124	8	0.8644	1
REGULATION_OF_MEMBRANE_POTENTIAL	GO:0042391 regulation of membrane potential, GOslim:biological_process	1	1	0.1589	1
UMP_METABOLIC_PROCESS	GO:0046049 UMP metabolic process, GOslim:biological_process	5	1	0.4049	1
STYLE_DEVELOPMENT	GO:0048479 style development, GOslim:biological_process	3	1	0.2925	1
PHOTOSYNTHESIS	GO:0015979 photosynthesis, GOslim:biological_process	436	11	1	1
CELL_FATE_COMMITMENT	GO:0045165 cell fate commitment, GOslim:biological_process	68	8	0.2933	1
HISTONE_UBIQUITINATION	GO:0016574 histone ubiquitination, GOslim:biological_process	4	2	0.0823	1
PYRIMIDINE_NUCLEOSIDE_METABOLIC_PROCESS	GO:0006213 pyrimidine nucleoside metabolic process, GOslim:biological_process	23	2	0.6253	1
CAAX-BOX_PROTEIN_MATURATION	GO:0080120 CAAX-box protein maturation, GOslim:biological_process	2	2	0.0368	1
CYSTEINE_BIOSYNTHETIC_PROCESS	GO:0019344 cysteine biosynthetic process, GOslim:biological_process	210	12	0.961	1
PLANT-TYPE_CELL_WALL_ORGANIZATION	GO:0009664 plant-type cell wall organization, GOslim:biological_process	365	12	1	1
PEROXISOME_LOCALIZATION	GO:0060151 peroxisome localization, GOslim:biological_process	44	7	0.1263	1
MUCILAGE_METABOLIC_PROCESS_INVOLVED_SEED_COAT_DEVELOPMENT	GO:0048359 mucilage metabolic process involved seed coat development, GOslim:biological_process	7	2	0.1676	1
HISTONE_H3-K27_METHYLATION	GO:0070734 histone H3-K27 methylation, GOslim:biological_process	3	1	0.2925	1
TAPETAL_LAYER_MORPHOGENESIS	GO:0048655 tapetal layer morphogenesis, GOslim:biological_process	4	1	0.3511	1
PYRIDINE_NUCLEOTIDE_SALVAGE	GO:0019365 pyridine nucleotide salvage, GOslim:biological_process	3	2	0.058	1
INOSITOL_METABOLIC_PROCESS	GO:0006020 inositol metabolic process, GOslim:biological_process	98	6	0.8705	1
ALKALOID_METABOLIC_PROCESS	GO:0009820 alkaloid metabolic process, GOslim:biological_process	225	13	0.9626	1
PROTEIN_MONOUBIQUITINATION	GO:0006513 protein monoubiquitination, GOslim:biological_process	2	2	0.0368	1
XANTHINE_METABOLIC_PROCESS	GO:0046110 xanthine metabolic process, GOslim:biological_process	1	1	0.1589	1
COENZYME_BIOSYNTHETIC_PROCESS	GO:0009108 coenzyme biosynthetic process, GOslim:biological_process	163	19	0.1765	1
SPHINGOLIPID_METABOLIC_PROCESS	GO:0006665 sphingolipid metabolic process, GOslim:biological_process	68	9	0.1859	1
VIRAL_REPLICATION_COMPLEX_FORMATION_AND_MAINTENANCE	GO:0046786 viral replication complex formation and maintenance, GOslim:biological_process	4	1	0.3511	1
CELLULAR_RESPONSE_TO_OXYGEN_RADICAL	GO:0071450 cellular response to oxygen radical, GOslim:biological_process	12	1	0.6753	1
REGULATION_OF_MERISTEM_STRUCTURAL_ORGANIZATION	GO:0009934 regulation of meristem structural organization, GOslim:biological_process	18	2	0.5024	1
S-GLYCOSIDE_BIOSYNTHETIC_PROCESS	GO:0016144 S-glycoside biosynthetic process, GOslim:biological_process	172	19	0.2351	1
CELLULAR_ALKENE_METABOLIC_PROCESS	GO:0043449 cellular alkene metabolic process, GOslim:biological_process	133	15	0.2447	1
REGULATION_OF_PROTON_TRANSPORT	GO:0010155 regulation of proton transport, GOslim:biological_process	77	2	0.9913	1
REMOVAL_OF_SUPEROXIDE_RADICALS	GO:0019430 removal of superoxide radicals, GOslim:biological_process	12	1	0.6753	1
NEGATIVE_REGULATION_OF_ABSCISIC_ACID_MEDIATED_SIGNALING_PATHWAY	GO:0009788 negative regulation of abscisic acid mediated signaling pathway, GOslim:biological_process	32	3	0.5633	1
CELL_WALL_ORGANIZATION_OR_BIOGENESIS	GO:0071554 cell wall organization or biogenesis, GOslim:biological_process	958	89	0.416	1
TRANSCRIPTION_INITIATION_FROM_RNA_POLYMERASE_II_PROMOTER	GO:0006367 transcription initiation from RNA polymerase II promoter, GOslim:biological_process	17	4	0.0906	1
CYCLIC-NUCLEOTIDE-MEDIATED_SIGNALING	GO:0019935 cyclic-nucleotide-mediated signaling, GOslim:biological_process	4	1	0.3511	1
POSITIVE_GRAVITROPISM	GO:0009958 positive gravitropism, GOslim:biological_process	26	2	0.6869	1
GENERATION_OF_PRECURSOR_METABOLITES_AND_ENERGY	GO:0006091 generation of precursor metabolites and energy, GOslim:biological_process	730	40	0.9997	1
[truncated: 1,246 more rows]

## Sheet: d) Cluster 3
Description	GO ID	Total	Found	p-value	q-value
[truncated: 1,713 more rows]

## Sheet: e) Cluster 4
Description	GO ID	Total	Found	p-value	q-value
[truncated: 1,310 more rows]

[truncated: 3 more sheets: f) Cluster 5, g) Cluster 6, h) Cluster 7]
